# Supplementary material for: Deciphering the Diversity in Bacterial Transporters That Salvage Queuosine Precursors
Source: Epigenomes. 2024 Apr 25;8(2):16. doi: 10.3390/epigenomes8020016 (PMC11130926; doi:10.3390/epigenomes8020016)
Supplement: Supplementary file 1 [file epigenomes-08-00016-s001.zip]

Archive with 5 entries (5 files):
- dataset S1.xlsx
- dataset S2_0304YY.xlsx
- dataset S3.xlsx
- Supplement figures_0304YY.pdf
- Table_S1-9_0304YY.xlsx
