# Supplementary material for: Deciphering the Diversity in Bacterial Transporters That Salvage Queuosine Precursors
Source: Epigenomes. 2024 Apr 25;8(2):16. doi: 10.3390/epigenomes8020016 (PMC11130926; doi:10.3390/epigenomes8020016)
Supplement: Supplementary file 1 [file epigenomes-08-00016-s001.zip › dataset S2_0304YY.xlsx]

## Sheet: dataset S2
Dataset S2. Count of Q pathway genes in the genomes of human oral microbiome that collected in https://www.homd.org/.
					count																			Count																	count
HOMD ID	genome ID	genus name	Species	order name	FolE1_Ec	FolE2_Ec	QueD_Ec	QueE_Ec	QueC_Ec	QueF1_Bsub	QueF2_Ec	TGT_Ec	QueA_Ec	QueG_Ec	QueH_Ec	QueK_CD1684	Qng1_D1C7A6	QueL_CD1682	YhhQ_Ct140	QueT_CD2097	QrtT_CD1683		order/phyla	total	FolE12	queD	QueE	QueC	QueF12	TGT	QueA	QueGH	QueK	Qng1	QueL	YhhQ	QueT	QrtT			total	FolE12	queD	QueE	QueC	QueF12	TGT	QueA	QueGH
SEQF10000.1	GCA_000691745.1	Fusobacterium	necrophorum	Fusobacteriales	2	0	0	0	1	1	1	1	1	0	1	0	0	0	1	0	0		Spirochaetales	94	6	3	0	0	0	33	34	34	12	0	0	6	0	0		Streptococcus	1807	1223	485	0	829	793	1321	1327	1260
SEQF10001.1	GCA_000691685.1	Fusobacterium	necrophorum	Fusobacteriales	2	0	0	0	1	1	1	1	1	0	1	0	0	0	1	0	0		Chlamydiales	13	0	0	0	0	0	13	0	0	0	0	0	13	0	0		Haemophilus/Aggregatibacter	402	270	0	197	245	270	270	268	269
SEQF10002.1	GCA_001597315.1	Fusobacterium	necrophorum	Fusobacteriales	2	0	0	0	1	1	1	1	1	0	1	0	0	0	1	0	0		Flavobacteriales	46	45	0	45	0	0	45	45	45	0	0	0	0	0	0		Neisseria	263	165	0	163	165	164	165	165	165
SEQF10003.1	GCA_000814775.1	Fusobacterium	necrophorum	Fusobacteriales	2	0	0	0	1	1	1	1	1	0	1	0	0	0	1	0	0		Bacteroidales	354	319	0	128	304	320	319	321	319	9	0	0	1	0	0		Corynebacterium	410	354	0	0	1	0	352	1	2
SEQF10004.1	GCA_001597475.1	Fusobacterium	necrophorum	Fusobacteriales	2	0	0	0	1	1	1	1	1	0	1	0	0	0	1	0	0		Campylobacterales	165	102	0	0	100	102	102	102	98	0	0	0	0	0	0		Fusobacterium	103	90	0	1	48	48	93	92	93
SEQF10005.1	GCA_000691705.1	Fusobacterium	necrophorum	Fusobacteriales	2	0	0	0	1	1	1	1	1	0	1	0	0	0	1	0	0		Rhodospirillales	12	9	9	4	8	9	8	9	9	9	0	0	0	0	0		Leptotrichia	22	9	0	1	0	0	17	19	18
SEQF10006.1	GCA_001596475.1	Fusobacterium	necrophorum	Fusobacteriales	2	0	0	0	1	1	1	1	1	0	1	0	0	0	1	0	0		Hyphomicrobiales	130	112	105	20	106	110	112	110	109	94	16	0	0	0	0		Capnocytophaga	42	41	0	41	0	0	41	41	41
SEQF10007.1	GCA_001597575.1	Fusobacterium	necrophorum	Fusobacteriales	2	0	0	0	1	1	1	1	1	0	1	0	0	0	1	0	0		Rhodobacterales	25	23	0	0	0	0	23	23	23	23	0	0	0	0	0		Corynebacterium	410	354	0	0	1	0	352	1	2
SEQF10008.1	GCA_004134955.1	Fusobacterium	necrophorum	Fusobacteriales	2	0	0	0	1	1	1	1	1	0	1	0	0	0	1	0	0		Caulobacterales	15	14	4	14	14	14	14	14	14	13	0	0	0	0	0		Actinomyces	72	65	0	0	0	0	0	0	0
SEQF10009.1	GCA_018205295.1	Fusobacterium	necrophorum	Fusobacteriales	2	0	0	0	1	1	1	1	1	0	1	0	0	0	1	0	0		Neisseriales	344	197	0	178	185	196	197	197	197	12	0	0	0	0	0		Corynebacterium	410	354	0	0	1	0	352	1	2
SEQF10010.1	GCA_902386295.1	Fusobacterium	necrophorum	Fusobacteriales	0	0	0	0	0	0	0	0	0	0	0	0	0	0	0	0	0		Burkholderiales	289	247	47	243	246	247	247	246	246	59	0	0	0	0	0
SEQF10011.1	GCA_001597565.1	Fusobacterium	necrophorum	Fusobacteriales	2	0	0	0	1	1	1	1	1	0	1	0	0	0	1	0	0		Xanthomonadales	56	49	49	3	49	49	49	49	49	49	0	0	0	0	0		Haemophilus	196	155	0	89	136	156	156	155	154
SEQF10012.1	GCA_008801775.1	Fusobacterium	necrophorum	Fusobacteriales	2	0	0	0	1	1	1	1	1	0	1	0	0	0	1	0	0		Pseudomonadales	202	176	171	162	176	176	176	176	176	111	0	0	0	0	0		Aggregatibacter	206	115	0	108	109	114	114	113	115
SEQF10013.1	GCA_001597545.1	Fusobacterium	necrophorum	Fusobacteriales	2	0	0	0	1	1	1	1	1	0	1	0	0	0	1	0	0		Moraxellales	306	254	0	132	254	254	254	254	247	0	0	0	0	0	0
SEQF10014.1	GCA_001597525.1	Fusobacterium	necrophorum	Fusobacteriales	2	0	0	0	1	1	1	1	1	0	1	0	0	0	1	0	0		Pasteurellales	402	270	0	197	245	270	270	268	269	10	0	0	0	0	0
SEQF10015.1	GCA_001596485.1	Fusobacterium	necrophorum	Fusobacteriales	2	0	0	0	1	1	1	1	1	0	1	0	0	0	1	0	0		Enterobacterales	494	431	432	430	432	431	432	431	423	329	1	0	0	0	66
SEQF10016.1	GCA_004134945.1	Fusobacterium	necrophorum	Fusobacteriales	2	0	0	0	1	1	1	1	1	0	1	0	0	0	1	0	0		Saccharibacteria	49	7	0	0	0	0	37	9	0	0	0	0	0	0	0
SEQF10017.1	GCA_001597305.1	Fusobacterium	necrophorum	Fusobacteriales	2	0	0	0	1	1	1	1	1	0	1	0	0	0	1	0	0		Eggerthellales	54	35	0	0	4	4	35	35	34	1	0	0	0	31	0
SEQF10018.1	GCA_021378605.1	Eggerthella	lenta	Eggerthellales	0	0	0	0	0	0	0	0	0	0	0	0	0	0	0	0	0		Coriobacteriales	25	22	0	0	1	1	22	22	16	12	0	0	0	16	1
SEQF10019.1	GCA_002148255.1	Eggerthella	lenta	Eggerthellales	0	0	0	0	0	0	0	0	0	0	0	0	0	0	0	0	0		Bifidobacteriales	285	151	0	0	0	0	250	0	0	250	0	0	0	0	43
SEQF10020.1	GCA_021378625.1	Eggerthella	lenta	Eggerthellales	0	0	0	0	0	0	0	0	0	0	0	0	0	0	0	0	0		Actinomycetales	121	112	0	0	0	0	47	0	0	23	0	0	0	0	0
SEQF10021.1	GCA_021378705.1	Eggerthella	lenta	Eggerthellales	0	0	0	0	0	0	0	0	0	0	0	0	0	0	0	0	0		Micrococcales	208	161	0	0	0	0	133	0	1	66	0	0	0	0	0
SEQF10022.1	GCA_021378685.1	Eggerthella	lenta	Eggerthellales	0	0	0	0	0	0	0	0	0	0	0	0	0	0	0	0	0		Propionibacteriales	113	106	0	0	0	0	106	0	0	94	0	0	0	0	0
SEQF10023.1	GCA_021378645.1	Eggerthella	lenta	Eggerthellales	0	0	0	0	0	0	0	0	0	0	0	0	0	0	0	0	0		Mycobacteriales	493	416	1	0	1	0	369	1	2	405	0	0	0	0	102
SEQF10024.1	GCA_021378665.1	Eggerthella	lenta	Eggerthellales	0	0	0	0	0	0	0	0	0	0	0	0	0	0	0	0	0		Fusobacteriales	131	99	0	2	48	48	114	115	115	6	0	62	49	3	8
SEQF10025.1	GCA_022845935.1	Eggerthella	lenta	Eggerthellales	1	0	0	0	0	0	0	1	1	0	1	0	0	0	0	1	0		Selenomonadales	23	21	20	0	20	21	21	21	21	0	1	0	0	0	0
SEQF10026.1	GCA_021378725.1	Eggerthella	lenta	Eggerthellales	0	0	0	0	0	0	0	0	0	0	0	0	0	0	0	0	0		Veillonellales	93	68	57	6	66	68	67	67	67	0	0	0	0	4	0
SEQF10027.1	GCA_015558765.1	Eggerthella	lenta	Eggerthellales	0	0	0	0	0	0	0	0	0	0	0	0	0	0	0	0	0		Mycoplasmatales	61	0	0	0	0	0	0	0	0	0	0	0	0	0	0
SEQF10028.1	GCA_020554205.1	Eggerthella	lenta	Eggerthellales	1	0	0	0	0	0	0	2	1	0	1	0	0	0	0	1	0		Bacillales	899	773	667	85	672	665	772	771	772	591	0	0	525	41	0
SEQF10029.1	GCA_006351165.1	Eggerthella	lenta	Eggerthellales	1	0	0	0	0	0	0	1	1	0	1	0	0	0	0	1	0		Lactobacillales	2914	1603	485	0	833	797	1897	1844	1603	821	0	0	0	749	309
SEQF1003.1	GCA_000174015.1	Lancefieldella	rimae	Coriobacteriales	1	0	0	0	0	0	0	1	1	0	1	1	0	0	0	1	0		Lachnospirales	25	2	0	0	2	2	24	24	24	11	0	0	0	20	3
SEQF10030.1	GCA_015547345.1	Eggerthella	lenta	Eggerthellales	0	0	0	0	0	0	0	0	0	0	0	0	0	0	0	0	0		Eubacteriales	10	7	0	0	0	0	9	9	8	8	0	7	0	3	7
SEQF10031.1	GCA_009755135.1	Eggerthella	lenta	Eggerthellales	1	0	0	0	0	0	0	1	1	0	1	0	0	0	0	1	0		Peptostreptococcales	23	13	2	0	0	0	21	21	21	0	0	2	3	13	0
SEQF10032.1	GCA_003340225.1	Eggerthella	lenta	Eggerthellales	1	0	0	0	0	0	0	1	1	0	1	0	0	0	0	1	0		Tissierellales	73	41	1	4	4	4	66	66	66	40	0	35	0	23	35
SEQF10033.1	GCA_015557185.1	Eggerthella	lenta	Eggerthellales	0	0	0	0	0	0	0	0	0	0	0	0	0	0	0	0	0
SEQF10034.1	GCA_003340195.1	Eggerthella	lenta	Eggerthellales	1	0	0	0	0	0	0	1	1	0	1	0	0	0	0	1	0		not shown (<10)
SEQF10035.1	GCA_003340155.1	Eggerthella	lenta	Eggerthellales	1	0	0	0	0	0	0	1	1	0	0	0	0	0	0	1	0		Anaerolineae	2
SEQF10036.1	GCA_003340075.1	Eggerthella	lenta	Eggerthellales	1	0	0	0	0	0	0	1	1	0	1	0	0	0	0	1	0		Anaerolineales	1
SEQF10037.1	GCA_020561205.1	Eggerthella	lenta	Eggerthellales	1	0	0	0	0	0	0	1	1	0	1	0	0	0	0	1	0		Bacteroidota	1
SEQF10038.1	GCA_015557295.1	Eggerthella	lenta	Eggerthellales	0	0	0	0	0	0	0	0	0	0	0	0	0	0	0	0	0		Bdellovibrionales	2
SEQF10039.1	GCA_019130955.1	Eggerthella	lenta	Eggerthellales	1	0	0	0	0	0	0	1	1	0	1	0	0	0	0	1	0		Caldilineales	1
SEQF10040.1	GCA_003340045.1	Eggerthella	lenta	Eggerthellales	1	0	0	0	0	0	0	1	1	0	1	0	0	0	0	1	0		Candidatus Absconditabacteria	2
SEQF10041.1	GCA_022136225.1	Eggerthella	lenta	Eggerthellales	1	0	0	0	0	0	0	1	1	0	1	0	0	0	0	1	0		Candidatus Gracilibacteria	2
SEQF10042.1	GCA_003438525.1	Eggerthella	lenta	Eggerthellales	1	0	0	0	0	0	0	1	1	0	1	0	0	0	0	1	0		Candidatus_Nanosynbacterales	3
SEQF10043.1	GCA_003339915.1	Eggerthella	lenta	Eggerthellales	1	0	0	0	0	0	0	1	1	0	1	0	0	0	0	1	0		Cardiobacteriales	9
SEQF10044.1	GCA_015554835.1	Eggerthella	lenta	Eggerthellales	0	0	0	0	0	0	0	0	0	0	0	0	0	0	0	0	0		Chitinophagales	1
SEQF10045.1	GCA_003340105.1	Eggerthella	lenta	Eggerthellales	1	0	0	0	0	0	0	1	1	0	1	0	0	0	0	1	0		Chlorobiales	2
SEQF10046.1	GCA_019131375.1	Eggerthella	lenta	Eggerthellales	1	0	0	0	0	0	0	1	1	0	1	0	0	0	0	1	0		Desulfobulbales	4
SEQF10047.1	GCA_003340065.1	Eggerthella	lenta	Eggerthellales	1	0	0	0	0	0	0	1	1	0	1	0	0	0	0	1	0		Desulfovibrionales	2
SEQF10048.1	GCA_015552345.1	Eggerthella	lenta	Eggerthellales	0	0	0	0	0	0	0	0	0	0	0	0	0	0	0	0	0		Erysipelotrichales	8
SEQF10049.1	GCA_020537545.1	Eggerthella	lenta	Eggerthellales	1	0	0	0	0	0	0	1	2	0	1	0	0	0	0	1	0		Ignavibacteriales	2
SEQF10050.1	GCA_003340145.1	Eggerthella	lenta	Eggerthellales	1	0	0	0	0	0	0	1	1	0	1	0	0	0	0	1	0		Metamycoplasmataceae	5
SEQF10051.1	GCA_022136145.1	Eggerthella	lenta	Eggerthellales	1	0	0	0	0	0	0	1	1	0	1	0	0	0	0	1	0		Methanobacteriales	5
SEQF10052.1	GCA_902388285.1	Eggerthella	lenta	Eggerthellales	0	0	0	0	0	0	0	0	0	0	0	0	0	0	0	0	0		Oscillatoriales	8
SEQF10053.1	GCA_015556435.1	Eggerthella	lenta	Eggerthellales	0	0	0	0	0	0	0	0	0	0	0	0	0	0	0	0	0		Rhodocyclales	1
SEQF10054.1	GCA_021397965.1	Eggerthella	lenta	Eggerthellales	0	0	0	0	0	0	0	0	0	0	0	0	0	0	0	0	0		Sphingomonadales	7
SEQF10055.1	GCA_003340165.1	Eggerthella	lenta	Eggerthellales	1	0	0	0	0	0	0	1	1	0	1	0	0	0	0	1	0		Synergistales	5
SEQF10056.1	GCA_003339875.1	Eggerthella	lenta	Eggerthellales	1	0	0	0	0	0	0	1	1	0	1	0	0	0	0	1	0		Victivallales	1
SEQF10057.1	GCA_009755205.1	Eggerthella	lenta	Eggerthellales	1	0	0	0	0	0	0	1	1	0	1	0	0	0	0	1	0		WPS-2	1
SEQF10058.1	GCA_015668575.1	Eggerthella	lenta	Eggerthellales	0	0	0	0	0	0	0	0	0	0	0	0	0	0	0	0	0
SEQF10059.1	GCA_019131175.1	Eggerthella	lenta	Eggerthellales	1	0	0	0	0	0	0	1	1	0	1	0	0	0	0	1	0		Total	8622
SEQF1006.1	GCA_000183985.1	Capnocytophaga	ochracea	Flavobacteriales	1	0	0	1	0	0	0	1	1	0	1	0	0	0	0	0	0
SEQF10060.1	GCA_902167675.1	Eggerthella	lenta	Eggerthellales	0	0	0	0	0	0	0	0	0	0	0	0	0	0	0	0	0
SEQF10061.1	GCA_020557775.1	Eggerthella	lenta	Eggerthellales	1	0	0	0	0	0	0	1	1	0	1	0	0	0	0	1	0
SEQF10062.1	GCA_020709135.1	Eggerthella	lenta	Eggerthellales	1	0	0	0	0	0	0	1	1	0	1	0	0	0	0	1	0
SEQF10063.1	GCA_003339885.1	Eggerthella	lenta	Eggerthellales	1	0	0	0	0	0	0	1	1	0	1	0	0	0	0	1	0
SEQF10064.1	GCA_003340395.1	Eggerthella	lenta	Eggerthellales	1	0	0	0	0	0	0	1	1	0	1	0	0	0	0	1	0
SEQF10065.1	GCA_000763035.1	Eggerthella	lenta	Eggerthellales	1	0	0	0	0	0	0	1	1	0	1	0	0	0	0	1	0
SEQF10066.1	GCA_003340405.1	Eggerthella	lenta	Eggerthellales	1	0	0	0	0	0	0	1	1	0	1	0	0	0	0	1	0
SEQF10067.1	GCA_018314255.1	Lentilactobacillus	buchneri	Lactobacillales	1	0	0	0	0	0	0	1	1	0	0	2	0	0	0	1	0
SEQF10068.1	GCA_008369805.1	Lentilactobacillus	buchneri	Lactobacillales	0	0	0	0	0	0	0	0	0	0	0	0	0	0	0	0	0
SEQF10069.1	GCA_009495635.1	Lentilactobacillus	buchneri	Lactobacillales	1	0	0	0	0	0	0	1	1	0	0	2	0	0	0	1	0
SEQF10070.1	GCA_005049245.1	Lentilactobacillus	buchneri	Lactobacillales	1	0	0	0	0	0	0	1	1	0	0	2	0	0	0	1	0
SEQF10071.1	GCA_009495485.1	Lentilactobacillus	buchneri	Lactobacillales	1	0	0	0	0	0	0	1	1	0	0	2	0	0	0	1	0
SEQF10072.1	GCA_005049205.1	Lentilactobacillus	buchneri	Lactobacillales	1	0	0	0	0	0	0	1	1	0	0	2	0	0	0	1	0
SEQF10073.1	GCA_001434735.1	Lentilactobacillus	buchneri	Lactobacillales	1	0	0	0	0	0	0	1	1	0	0	2	0	0	0	1	0
SEQF10074.1	GCA_009495575.1	Lentilactobacillus	buchneri	Lactobacillales	1	0	0	0	0	0	0	1	1	0	0	2	0	0	0	1	0
SEQF10075.1	GCA_005049145.1	Lentilactobacillus	buchneri	Lactobacillales	1	0	0	0	0	0	0	1	1	0	0	2	0	0	0	1	0
SEQF10076.1	GCA_007992235.1	Lentilactobacillus	buchneri	Lactobacillales	1	0	0	0	0	0	0	1	1	0	0	2	0	0	0	1	0
SEQF10077.1	GCA_005047575.1	Lentilactobacillus	buchneri	Lactobacillales	1	0	0	0	0	0	0	1	1	0	0	2	0	0	0	1	0
SEQF10078.1	GCA_005048055.1	Lentilactobacillus	buchneri	Lactobacillales	1	0	0	0	0	0	0	1	1	0	0	2	0	0	0	1	0
SEQF10079.1	GCA_005047285.1	Lentilactobacillus	buchneri	Lactobacillales	1	0	0	0	0	0	0	1	1	0	0	2	0	0	0	1	0
SEQF1008.1	GCA_000023285.1	Capnocytophaga	ochracea	Flavobacteriales	1	0	0	1	0	0	0	1	1	0	1	0	0	0	0	0	0
SEQF10080.1	GCA_005047265.1	Lentilactobacillus	buchneri	Lactobacillales	1	0	0	0	0	0	0	1	1	0	0	2	0	0	0	1	0
SEQF10081.1	GCA_013167855.1	Lentilactobacillus	buchneri	Lactobacillales	1	0	0	0	0	0	0	1	1	0	0	2	0	0	0	1	0
SEQF10082.1	GCA_004354745.1	Lentilactobacillus	buchneri	Lactobacillales	1	0	0	0	0	0	0	1	1	0	0	2	0	0	0	1	0
SEQF10083.1	GCA_005047235.1	Lentilactobacillus	buchneri	Lactobacillales	1	0	0	0	0	0	0	1	1	0	0	2	0	0	0	1	0
SEQF10084.1	GCA_009495585.1	Lentilactobacillus	buchneri	Lactobacillales	1	0	0	0	0	0	0	1	1	0	0	2	0	0	0	1	0
SEQF10085.1	GCA_009495475.1	Lentilactobacillus	buchneri	Lactobacillales	1	0	0	0	0	0	0	1	1	0	0	2	0	0	0	1	0
SEQF10086.1	GCA_013167835.1	Lentilactobacillus	buchneri	Lactobacillales	1	0	0	0	0	0	0	1	1	0	0	2	0	0	0	1	0
SEQF10087.1	GCA_023507525.1	Lentilactobacillus	buchneri	Lactobacillales	0	0	0	0	0	0	0	0	0	0	0	0	0	0	0	0	0
SEQF10088.1	GCA_009495565.1	Lentilactobacillus	buchneri	Lactobacillales	1	0	0	0	0	0	0	1	1	0	0	2	0	0	0	1	0
SEQF10089.1	GCA_005048025.1	Lentilactobacillus	buchneri	Lactobacillales	1	0	0	0	0	0	0	1	1	0	0	2	0	0	0	1	0
SEQF10090.1	GCA_009495555.1	Lentilactobacillus	buchneri	Lactobacillales	1	0	0	0	0	0	0	1	1	0	0	2	0	0	0	1	0
SEQF10091.1	GCA_009495465.1	Lentilactobacillus	buchneri	Lactobacillales	1	0	0	0	0	0	0	1	1	0	0	2	0	0	0	1	0
SEQF10092.1	GCA_900637515.1	Veillonella	dispar	Veillonellales	2	0	1	0	1	1	1	1	1	1	0	0	0	0	0	0	0
SEQF10093.1	GCA_018406505.1	Veillonella	dispar	Veillonellales	1	0	0	0	1	1	1	1	1	1	0	0	0	0	0	0	0
SEQF10094.1	GCA_003474105.1	Veillonella	dispar	Veillonellales	2	0	1	0	1	1	1	1	1	1	0	0	0	0	0	0	0
SEQF10095.1	GCA_009710845.1	Veillonella	dispar	Veillonellales	2	0	1	0	1	1	1	1	1	1	0	0	0	0	0	0	0
SEQF10096.1	GCA_902364435.1	Veillonella	dispar	Veillonellales	0	0	0	0	0	0	0	0	0	0	0	0	0	0	0	0	0
SEQF10097.1	GCA_003463825.1	Veillonella	dispar	Veillonellales	1	0	0	0	1	1	1	1	1	1	0	0	0	0	0	0	0
SEQF10098.1	GCA_009710825.1	Veillonella	dispar	Veillonellales	2	0	1	0	1	1	1	1	1	1	0	0	0	0	0	0	0
SEQF10099.1	GCA_002959755.1	Veillonella	dispar	Veillonellales	2	0	1	0	1	1	1	1	1	1	0	0	0	0	0	0	0
SEQF10100.1	GCA_020687175.1	Veillonella	dispar	Veillonellales	2	0	1	0	1	1	1	1	1	1	0	0	0	0	0	0	0
SEQF10101.1	GCA_004166985.1	Veillonella	dispar	Veillonellales	2	0	1	0	1	1	1	1	1	1	0	0	0	0	0	0	0
SEQF10102.1	GCA_009710805.1	Veillonella	dispar	Veillonellales	3	0	1	0	1	1	1	1	1	1	0	0	0	0	0	1	0
SEQF10103.1	GCA_015547025.1	Veillonella	dispar	Veillonellales	0	0	0	0	0	0	0	0	0	0	0	0	0	0	0	0	0
SEQF10104.1	GCA_001553315.1	Veillonella	dispar	Veillonellales	2	0	1	0	1	1	1	1	1	1	0	0	0	0	0	0	0
SEQF10105.1	GCA_005864225.1	Lentilactobacillus	parafarraginis	Lactobacillales	1	0	0	0	0	0	0	1	1	1	0	2	0	0	0	1	0
SEQF10106.1	GCA_902388245.1	Lentilactobacillus	parafarraginis	Lactobacillales	0	0	0	0	0	0	0	0	0	0	0	0	0	0	0	0	0
SEQF10107.1	GCA_017821535.1	Helicobacter	pylori	Campylobacterales	1	0	0	0	1	1	1	1	1	0	1	0	0	0	0	0	0
SEQF10108.1	GCA_003050665.1	Helicobacter	pylori	Campylobacterales	1	0	0	0	1	1	1	1	1	0	1	0	0	0	0	0	0
SEQF10109.1	GCA_004295525.1	Helicobacter	pylori	Campylobacterales	1	0	0	0	1	1	1	1	1	0	1	0	0	0	0	0	0
SEQF10110.1	GCA_022921215.1	Helicobacter	pylori	Campylobacterales	1	0	0	0	1	1	1	1	1	0	1	0	0	0	0	0	0
SEQF10111.1	GCA_022924515.1	Helicobacter	pylori	Campylobacterales	1	0	0	0	1	1	1	1	1	0	1	0	0	0	0	0	0
SEQF10112.1	GCA_016749715.1	Helicobacter	pylori	Campylobacterales	1	0	0	0	1	1	1	1	1	0	1	0	0	0	0	0	0
SEQF10113.1	GCA_016755795.1	Helicobacter	pylori	Campylobacterales	1	0	0	0	1	1	1	1	1	0	1	0	0	0	0	0	0
SEQF10114.1	GCA_007843715.1	Helicobacter	pylori	Campylobacterales	1	0	0	0	1	1	1	1	1	0	1	0	0	0	0	0	0
SEQF10115.1	GCA_000685705.1	Helicobacter	pylori	Campylobacterales	1	0	0	0	1	1	1	1	1	0	1	0	0	0	0	0	0
SEQF10116.1	GCA_016748925.1	Helicobacter	pylori	Campylobacterales	0	0	0	0	0	0	0	0	0	0	0	0	0	0	0	0	0
SEQF10117.1	GCA_022925775.1	Helicobacter	pylori	Campylobacterales	1	0	0	0	1	1	1	1	1	0	1	0	0	0	0	0	0
SEQF10118.1	GCA_016749085.1	Helicobacter	pylori	Campylobacterales	1	0	0	0	1	1	1	1	1	0	1	0	0	0	0	0	0
SEQF10119.1	GCA_900120205.1	Helicobacter	pylori	Campylobacterales	0	0	0	0	0	0	0	0	0	0	0	0	0	0	0	0	0
SEQF10120.1	GCA_000498315.1	Helicobacter	pylori	Campylobacterales	1	0	0	0	1	1	1	1	1	0	1	0	0	0	0	0	0
SEQF10121.1	GCA_022925925.1	Helicobacter	pylori	Campylobacterales	1	0	0	0	1	1	1	1	1	0	1	0	0	0	0	0	0
SEQF10122.1	GCA_022922915.1	Helicobacter	pylori	Campylobacterales	1	0	0	0	1	1	1	1	1	0	1	0	0	0	0	0	0
SEQF10123.1	GCA_016748175.1	Helicobacter	pylori	Campylobacterales	1	0	0	0	1	1	1	1	1	0	1	0	0	0	0	0	0
SEQF10124.1	GCA_020735805.1	Helicobacter	pylori	Campylobacterales	1	0	0	0	1	1	1	1	1	0	1	0	0	0	0	0	0
SEQF10125.1	GCA_000829135.1	Helicobacter	pylori	Campylobacterales	0	0	0	0	0	0	0	0	0	0	0	0	0	0	0	0	0
SEQF10126.1	GCA_000277365.1	Helicobacter	pylori	Campylobacterales	1	0	0	0	1	1	1	1	1	0	1	0	0	0	0	0	0
SEQF10127.3	GCA_000392475.3	Helicobacter	pylori	Campylobacterales	1	0	0	0	1	1	1	1	1	0	1	0	0	0	0	0	0
SEQF10128.1	GCA_006338685.1	Helicobacter	pylori	Campylobacterales	0	0	0	0	0	0	0	0	0	0	0	0	0	0	0	0	0
SEQF10129.1	GCA_000600205.1	Helicobacter	pylori	Campylobacterales	1	0	0	0	1	1	1	1	1	0	1	0	0	0	0	0	0
SEQF1013.1	GCA_000175375.1	Corynebacterium	matruchotii	Mycobacteriales	1	0	0	0	0	0	0	1	0	0	0	3	0	0	0	0	1
SEQF10130.1	GCA_002005525.1	Helicobacter	pylori	Campylobacterales	1	0	0	0	1	1	1	1	1	0	1	0	0	0	0	0	0
SEQF10131.3	GCA_000392455.3	Helicobacter	pylori	Campylobacterales	1	0	0	0	1	1	1	1	1	0	1	0	0	0	0	0	0
SEQF10132.1	GCA_000829095.1	Helicobacter	pylori	Campylobacterales	0	0	0	0	0	0	0	0	0	0	0	0	0	0	0	0	0
SEQF10133.1	GCA_022921855.1	Helicobacter	pylori	Campylobacterales	1	0	0	0	1	1	1	1	1	0	1	0	0	0	0	0	0
SEQF10134.1	GCA_016757555.1	Helicobacter	pylori	Campylobacterales	1	0	0	0	1	1	1	1	1	0	1	0	0	0	0	0	0
SEQF10135.1	GCA_022921335.1	Helicobacter	pylori	Campylobacterales	1	0	0	0	1	1	1	1	1	0	1	0	0	0	0	0	0
SEQF10136.1	GCA_000828955.1	Helicobacter	pylori	Campylobacterales	1	0	0	0	1	1	1	1	1	0	1	0	0	0	0	0	0
SEQF10137.1	GCA_021729725.1	Helicobacter	pylori	Campylobacterales	0	0	0	0	0	0	0	0	0	0	0	0	0	0	0	0	0
SEQF10138.2	GCA_000439295.2	Helicobacter	pylori	Campylobacterales	1	0	0	0	1	1	1	1	1	0	1	0	0	0	0	0	0
SEQF10139.1	GCA_000829115.1	Helicobacter	pylori	Campylobacterales	0	0	0	0	0	0	0	0	0	0	0	0	0	0	0	0	0
SEQF1014.1	GCA_000025765.1	Cutibacterium	acnes	Propionibacteriales	1	0	0	0	0	0	0	1	0	0	0	1	0	0	0	0	0
SEQF10140.1	GCA_022923695.1	Helicobacter	pylori	Campylobacterales	1	0	0	0	1	1	1	1	1	0	1	0	0	0	0	0	0
SEQF10141.1	GCA_000982695.1	Helicobacter	pylori	Campylobacterales	1	0	0	0	1	1	1	1	1	0	1	0	0	0	0	0	0
SEQF10142.1	GCA_022925175.1	Helicobacter	pylori	Campylobacterales	1	0	0	0	1	1	1	1	1	0	1	0	0	0	0	0	0
SEQF10143.1	GCA_006337405.1	Helicobacter	pylori	Campylobacterales	0	0	0	0	0	0	0	0	0	0	0	0	0	0	0	0	0
SEQF10144.2	GCA_000178935.2	Helicobacter	pylori	Campylobacterales	1	0	0	0	1	1	1	1	1	0	1	0	0	0	0	0	0
SEQF10145.1	GCA_022921255.1	Helicobacter	pylori	Campylobacterales	1	0	0	0	1	1	1	1	1	0	1	0	0	0	0	0	0
SEQF10146.1	GCA_022921295.1	Helicobacter	pylori	Campylobacterales	1	0	0	0	1	1	1	1	1	0	1	0	0	0	0	0	0
SEQF10147.1	GCA_017821655.1	Helicobacter	pylori	Campylobacterales	1	0	0	0	1	1	1	1	1	0	0	0	0	0	0	0	0
SEQF10148.1	GCA_001653395.1	Helicobacter	pylori	Campylobacterales	1	0	0	0	1	1	1	1	1	0	1	0	0	0	0	0	0
SEQF10149.1	GCA_000185205.1	Helicobacter	pylori	Campylobacterales	1	0	0	0	1	1	1	1	1	0	0	0	0	0	0	0	0
SEQF10150.1	GCA_000685745.1	Helicobacter	pylori	Campylobacterales	1	0	0	0	1	1	1	1	1	0	1	0	0	0	0	0	0
SEQF10151.1	GCA_002952635.1	Helicobacter	pylori	Campylobacterales	1	0	0	0	1	1	1	1	1	0	1	0	0	0	0	0	0
SEQF10152.1	GCA_022923655.1	Helicobacter	pylori	Campylobacterales	1	0	0	0	1	1	1	1	1	0	1	0	0	0	0	0	0
SEQF10153.1	GCA_022924475.1	Helicobacter	pylori	Campylobacterales	1	0	0	0	1	1	1	1	1	0	1	0	0	0	0	0	0
SEQF10154.1	GCA_900187235.1	Corynebacterium	urealyticum	Mycobacteriales	1	0	0	0	0	0	0	1	0	0	0	2	0	0	0	0	1
SEQF10155.1	GCA_016127975.1	Corynebacterium	urealyticum	Mycobacteriales	1	0	0	0	0	0	0	1	0	0	0	2	0	0	0	0	1
SEQF10156.1	GCA_016127095.1	Corynebacterium	urealyticum	Mycobacteriales	1	0	0	0	0	0	0	1	0	0	0	2	0	0	0	0	1
SEQF10157.1	GCA_016403265.1	Corynebacterium	urealyticum	Mycobacteriales	1	0	0	0	0	0	0	1	0	0	0	2	0	0	0	0	1
SEQF10158.1	GCA_008180085.1	Corynebacterium	urealyticum	Mycobacteriales	1	0	0	0	0	0	0	1	0	0	0	2	0	0	0	0	1
SEQF10159.1	GCA_008244525.1	Corynebacterium	urealyticum	Mycobacteriales	1	0	0	0	0	0	0	1	0	0	0	2	0	0	0	0	1
SEQF1016.1	GCA_000158615.1	Eikenella	corrodens	Neisseriales	0	1	0	0	0	1	1	1	1	0	1	0	0	0	0	0	0
SEQF10160.1	GCA_008180045.1	Corynebacterium	urealyticum	Mycobacteriales	1	0	0	0	0	0	0	1	0	0	0	2	0	0	0	0	1
SEQF10161.1	GCA_008180065.1	Corynebacterium	urealyticum	Mycobacteriales	1	0	0	0	0	0	0	1	0	0	0	2	0	0	0	0	1
SEQF10162.2	GCA_016466415.2	Ralstonia	pickettii	Burkholderiales	1	1	0	1	1	1	1	1	1	1	0	0	0	0	0	0	0
SEQF10163.1	GCA_002393485.1	Ralstonia	pickettii	Burkholderiales	0	1	0	1	1	1	1	1	1	1	0	0	0	0	0	0	0
SEQF10164.1	GCA_020341455.1	Ralstonia	pickettii	Burkholderiales	1	1	0	1	1	1	1	1	1	1	0	0	0	0	0	0	0
SEQF10165.1	GCA_019643015.1	Ralstonia	pickettii	Burkholderiales	1	1	0	1	1	1	1	1	1	1	0	0	0	0	0	0	0
SEQF10166.1	GCA_019641815.1	Ralstonia	pickettii	Burkholderiales	1	1	0	1	1	1	1	1	1	1	0	0	0	0	0	0	0
SEQF10167.1	GCA_014142725.1	Ralstonia	pickettii	Burkholderiales	1	1	0	1	1	1	1	1	1	1	0	0	0	0	0	0	0
SEQF10168.1	GCA_014141745.1	Ralstonia	pickettii	Burkholderiales	1	1	0	1	1	1	1	1	1	1	0	0	0	0	0	0	0
SEQF10169.1	GCA_019642995.1	Ralstonia	pickettii	Burkholderiales	1	1	0	1	1	1	1	1	1	1	0	0	0	0	0	0	0
SEQF1017.1	GCA_000161975.1	Peptostreptococcaceae	[Eubacterium]_saphenum	Peptostreptococcales	0	0	0	0	0	0	0	1	1	0	1	0	0	0	0	1	0
SEQF10170.1	GCA_019642275.1	Ralstonia	pickettii	Burkholderiales	1	1	0	1	1	1	1	1	1	1	0	0	0	0	0	0	0
SEQF10171.1	GCA_014141585.1	Ralstonia	pickettii	Burkholderiales	1	1	0	1	1	1	1	1	1	1	0	0	0	0	0	0	0
SEQF10172.1	GCA_014142165.1	Ralstonia	pickettii	Burkholderiales	1	1	0	1	1	1	1	1	1	1	0	0	0	0	0	0	0
SEQF10173.1	GCA_019642675.1	Ralstonia	pickettii	Burkholderiales	1	1	0	1	1	1	1	1	1	1	0	0	0	0	0	0	0
SEQF10174.1	GCA_014142445.1	Ralstonia	pickettii	Burkholderiales	1	1	0	1	1	1	1	1	1	1	0	0	0	0	0	0	0
SEQF10175.1	GCA_019642555.1	Ralstonia	pickettii	Burkholderiales	1	1	0	1	1	1	1	1	1	1	0	0	0	0	0	0	0
SEQF10176.1	GCA_019643255.1	Ralstonia	pickettii	Burkholderiales	1	1	0	1	1	1	1	1	2	1	0	0	0	0	0	0	0
SEQF10177.1	GCA_014142135.1	Ralstonia	pickettii	Burkholderiales	1	1	0	1	1	1	1	1	1	1	0	0	0	0	0	0	0
SEQF10178.1	GCA_019642855.1	Ralstonia	pickettii	Burkholderiales	1	1	0	1	1	1	1	1	1	1	0	0	0	0	0	0	0
SEQF10179.1	GCA_019642335.1	Ralstonia	pickettii	Burkholderiales	1	1	0	1	1	1	1	1	1	1	0	0	0	0	0	0	0
SEQF1018.2	GCA_000163895.2	Filifactor	alocis	Peptostreptococcales	0	0	0	0	0	0	0	1	1	0	1	0	0	0	0	1	0
SEQF10180.1	GCA_019641795.1	Ralstonia	pickettii	Burkholderiales	1	1	0	1	1	1	1	1	1	1	0	0	0	0	0	0	0
SEQF10181.1	GCA_019642025.1	Ralstonia	pickettii	Burkholderiales	1	1	0	1	1	1	1	1	1	1	0	0	0	0	0	0	0
SEQF10182.1	GCA_014142645.1	Ralstonia	pickettii	Burkholderiales	1	1	0	1	1	1	1	1	1	1	0	0	0	0	0	0	0
SEQF10183.1	GCA_019643235.1	Ralstonia	pickettii	Burkholderiales	1	1	0	1	1	1	1	1	1	1	0	0	0	0	0	0	0
SEQF10184.1	GCA_014142655.1	Ralstonia	pickettii	Burkholderiales	1	1	0	1	1	1	1	1	1	1	0	0	0	0	0	0	0
SEQF10185.1	GCA_014141805.1	Ralstonia	pickettii	Burkholderiales	1	1	0	1	1	1	1	1	1	1	0	0	0	0	0	0	0
SEQF10186.1	GCA_014142505.1	Ralstonia	pickettii	Burkholderiales	1	1	0	1	1	1	1	1	1	1	0	0	0	0	0	0	0
SEQF10187.1	GCA_019643215.1	Ralstonia	pickettii	Burkholderiales	1	1	0	1	1	1	1	1	1	1	0	0	0	0	0	0	0
SEQF10188.1	GCA_013391365.1	Ralstonia	pickettii	Burkholderiales	1	1	0	1	1	1	1	1	1	1	0	0	0	0	0	0	0
SEQF10189.1	GCA_014142125.1	Ralstonia	pickettii	Burkholderiales	1	1	0	1	1	1	1	1	1	1	0	0	0	0	0	0	0
SEQF1019.1	GCA_000173915.1	Gemella	haemolysans	Bacillales	1	0	0	0	0	0	0	1	1	0	1	0	0	0	0	1	0
SEQF10190.1	GCA_014141695.1	Ralstonia	pickettii	Burkholderiales	1	1	0	1	1	1	1	1	1	1	0	0	0	0	0	0	0
SEQF10191.1	GCA_014142405.1	Ralstonia	pickettii	Burkholderiales	1	1	0	1	1	1	1	1	1	1	0	0	0	0	0	0	0
SEQF10192.1	GCA_019641775.1	Ralstonia	pickettii	Burkholderiales	1	1	0	1	1	1	1	1	1	1	0	0	0	0	0	0	0
SEQF10193.1	GCA_002849525.1	Ralstonia	pickettii	Burkholderiales	1	1	0	1	1	1	1	1	1	1	0	0	0	0	0	0	0
SEQF10194.1	GCA_900455835.1	Ralstonia	pickettii	Burkholderiales	1	1	0	1	1	1	1	1	1	1	0	0	0	0	0	0	0
SEQF10195.1	GCA_014142195.1	Ralstonia	pickettii	Burkholderiales	1	1	0	1	1	1	1	1	1	1	0	0	0	0	0	0	0
SEQF10196.1	GCA_013413505.1	Ralstonia	pickettii	Burkholderiales	1	1	0	1	1	1	1	1	1	1	0	0	0	0	0	0	0
SEQF10197.1	GCA_902374465.1	Ralstonia	pickettii	Burkholderiales	0	0	0	0	0	0	0	0	0	0	0	0	0	0	0	0	0
SEQF10198.1	GCA_019642935.1	Ralstonia	pickettii	Burkholderiales	1	1	0	1	1	1	1	1	1	1	0	0	0	0	0	0	0
SEQF10199.1	GCA_000607185.1	Ralstonia	pickettii	Burkholderiales	0	0	0	0	0	0	0	0	0	0	0	0	0	0	0	0	0
SEQF10200.1	GCA_014142625.1	Ralstonia	pickettii	Burkholderiales	1	1	0	1	1	1	1	1	1	1	0	0	0	0	0	0	0
SEQF10201.1	GCA_019641905.1	Ralstonia	pickettii	Burkholderiales	0	1	0	1	1	1	1	1	1	1	0	0	0	0	0	0	0
SEQF10202.1	GCA_014142735.1	Ralstonia	pickettii	Burkholderiales	1	1	0	1	1	1	1	1	1	1	0	0	0	0	0	0	0
SEQF10203.1	GCA_019642805.1	Ralstonia	pickettii	Burkholderiales	1	1	0	1	1	1	1	1	1	1	0	0	0	0	0	0	0
SEQF10204.1	GCA_014142515.1	Ralstonia	pickettii	Burkholderiales	1	1	0	1	1	1	1	1	1	1	0	0	0	0	0	0	0
SEQF10205.1	GCA_019642515.1	Ralstonia	pickettii	Burkholderiales	1	1	0	1	1	1	1	1	1	1	0	0	0	0	0	0	0
SEQF10206.1	GCA_014142575.1	Ralstonia	pickettii	Burkholderiales	1	1	0	1	1	1	1	1	1	1	0	0	0	0	0	0	0
SEQF10207.1	GCA_014141735.1	Ralstonia	pickettii	Burkholderiales	1	1	0	1	1	1	1	1	1	1	0	0	0	0	0	0	0
SEQF10208.1	GCA_018603815.1	Ralstonia	pickettii	Burkholderiales	1	1	0	1	1	1	1	1	1	1	0	0	0	0	0	0	0
SEQF10209.1	GCA_019643135.1	Ralstonia	pickettii	Burkholderiales	1	1	0	1	1	1	1	1	1	1	0	0	0	0	0	0	0
SEQF10210.1	GCA_014195675.1	Erythrobacter	ramosus	Sphingomonadales	1	0	0	1	1	1	0	1	1	1	0	0	0	0	0	0	0
SEQF10211.1	GCA_018588945.1	Microbacterium	flavescens	Micrococcales	0	0	0	0	0	0	0	0	0	0	0	0	0	0	0	0	0
SEQF1025.1	GCA_000009625.1	Mesorhizobium	japonicum	Hyphomicrobiales	1	0	2	1	2	1	0	1	1	1	0	2	0	0	0	0	0
SEQF1026.1	GCA_000008065.1	Lactobacillus	johnsonii	Lactobacillales	0	0	0	0	0	0	0	0	0	0	0	1	0	0	0	0	0
SEQF1027.1	GCA_000007945.1	Haemophilus	ducreyi	Pasteurellales	1	0	0	1	1	1	1	1	1	0	1	0	0	0	0	0	0
SEQF1029.1	GCA_000154405.1	Parvimonas	micra	Tissierellales	0	0	0	0	0	0	0	1	1	0	1	0	0	0	0	1	0
SEQF1031.1	GCA_000143845.1	Olsenella	uli	Coriobacteriales	1	0	0	0	0	0	0	1	1	0	1	0	0	0	0	1	0
SEQF1032.1	GCA_000008585.1	Mycobacterium	tuberculosis	Mycobacteriales	1	0	0	0	0	0	0	0	0	0	0	1	0	0	0	0	0
SEQF1033.1	GCA_000174815.1	Porphyromonas	endodontalis	Bacteroidales	1	0	0	1	1	1	0	1	2	1	0	0	0	0	0	0	0
SEQF1034.2	GCA_000195955.2	Mycobacterium	tuberculosis	Mycobacteriales	1	0	0	0	0	0	0	0	0	0	0	1	0	0	0	0	0
SEQF1035.1	GCA_000195855.1	Mycobacterium	leprae	Mycobacteriales	1	0	0	0	0	0	0	0	0	0	0	0	0	0	0	0	0
SEQF1037.1	GCA_000007845.1	Bacillus	anthracis	Bacillales	1	0	1	0	1	1	1	1	1	1	0	3	0	0	0	0	0
SEQF1038.1	GCA_000008445.1	Bacillus	anthracis	Bacillales	1	0	1	0	1	1	1	1	1	1	0	3	0	0	0	0	0
SEQF1039.1	GCA_000175615.1	Rothia	mucilaginosa	Micrococcales	1	0	0	0	0	0	0	1	0	0	0	0	0	0	0	0	0
SEQF1041.1	GCA_000008165.1	Bacillus	anthracis	Bacillales	1	0	1	0	1	1	1	1	1	1	0	3	0	0	0	0	0
SEQF1045.1	GCA_000160115.1	Shuttleworthia	satelles	Lachnospirales	0	0	0	0	0	0	0	1	1	0	1	0	0	0	0	1	0
SEQF1050.1	GCA_000167135.1	Listeria	monocytogenes	Bacillales	1	0	0	0	0	0	0	1	1	1	0	0	0	0	0	0	0
SEQF1051.1	GCA_000008285.1	Listeria	monocytogenes	Bacillales	1	0	0	0	0	0	0	1	1	0	0	0	0	0	0	0	0
SEQF1052.1	GCA_000167155.1	Listeria	monocytogenes	Bacillales	1	0	0	0	0	0	0	1	2	1	0	0	0	0	0	0	0
SEQF1053.2	GCA_000093125.2	Listeria	monocytogenes	Bacillales	1	0	0	0	0	0	0	1	1	1	0	0	0	0	0	0	0
SEQF1054.1	GCA_000013825.1	Yersinia	pestis	Enterobacterales	1	0	1	1	1	1	1	1	1	1	0	0	0	0	0	0	0
SEQF1055.1	GCA_000009065.1	Yersinia	pestis	Enterobacterales	1	0	1	1	1	1	1	1	1	1	0	0	0	0	0	0	0
SEQF1056.1	GCA_000006645.1	Yersinia	pestis	Enterobacterales	1	0	1	1	1	1	1	1	1	1	0	0	0	0	0	0	0
SEQF1057.1	GCA_000013805.1	Yersinia	pestis	Enterobacterales	1	0	1	1	1	1	1	1	1	1	0	0	0	0	0	0	0
SEQF1059.1	GCA_000019825.1	Streptococcus	pneumoniae	Lactobacillales	1	0	0	0	1	1	1	1	1	0	1	0	0	0	0	1	0
SEQF1061.1	GCA_000008185.1	Treponema	denticola	Spirochaetales	0	0	0	0	0	0	0	1	1	0	1	0	0	0	0	0	0
SEQF1062.1	GCA_000008605.1	Treponema	pallidum	Spirochaetales	0	0	0	0	0	0	0	0	0	0	0	0	0	0	0	0	0
SEQF1064.1	GCA_000007585.1	Porphyromonas	gingivalis	Bacteroidales	1	0	0	1	1	1	1	1	2	1	0	0	0	0	0	0	0
SEQF1065.1	GCA_000261025.1	Prevotella	intermedia	Bacteroidales	1	0	0	0	1	1	1	1	2	1	0	0	0	0	0	0	0
SEQF1066.1	GCA_000017005.1	Streptococcus	gordonii	Lactobacillales	1	0	0	0	0	0	0	1	1	0	1	0	0	0	0	0	0
SEQF1067.1	GCA_000027165.1	Streptococcus	mitis	Lactobacillales	1	0	1	0	1	1	1	1	1	0	1	0	0	0	0	1	0
SEQF1069.2	GCA_000007465.2	Streptococcus	mutans	Lactobacillales	1	0	0	0	1	1	1	1	1	1	0	0	0	0	0	0	0
SEQF1070.1	GCA_000014205.1	Streptococcus	sanguinis	Lactobacillales	1	0	0	0	0	0	0	1	1	1	0	0	0	0	0	1	0
SEQF1072.1	GCA_000238215.1	Tannerella	forsythia	Bacteroidales	1	0	0	0	1	1	1	1	2	0	1	0	0	0	0	0	0
SEQF1073.1	GCA_000011985.1	Lactobacillus	acidophilus	Lactobacillales	0	0	0	0	0	0	0	0	0	0	0	1	0	0	0	0	0
SEQF1074.1	GCA_000604045.1	Aggregatibacter	actinomycetemcomitans	Pasteurellales	1	0	0	1	1	1	1	1	1	0	1	0	0	0	0	0	0
SEQF1075.1	GCA_000153625.1	Fusobacterium	nucleatum	Fusobacteriales	1	0	0	0	0	0	0	1	1	0	1	0	0	1	0	0	0
SEQF1076.1	GCA_000182945.1	Fusobacterium	nucleatum	Fusobacteriales	1	0	0	0	0	0	0	1	2	0	1	0	0	1	0	0	0
SEQF1078.1	GCA_000007325.1	Fusobacterium	nucleatum	Fusobacteriales	1	0	0	0	0	0	0	1	1	0	1	0	0	1	0	0	0
SEQF1080.1	GCA_000007785.1	Enterococcus	faecalis	Lactobacillales	1	0	0	0	0	0	0	1	1	1	0	2	0	0	0	1	1
SEQF1082.1	GCA_000007885.1	Yersinia	pestis	Enterobacterales	1	0	1	1	1	1	1	1	1	1	0	0	0	0	0	0	0
SEQF1083.1	GCA_000024105.1	Anaerococcus	prevotii	Tissierellales	0	0	0	0	0	0	0	1	1	0	1	0	0	0	0	1	0
SEQF1084.1	GCA_000024225.1	Lancefieldella	parvula	Coriobacteriales	1	0	0	0	0	0	0	1	1	0	1	1	0	0	0	1	0
SEQF1086.1	GCA_000195715.1	Bordetella	pertussis	Burkholderiales	0	1	0	1	1	1	1	1	1	0	1	0	0	0	0	0	0
SEQF1087.1	GCA_000016265.1	Agrobacterium	tumefaciens	Hyphomicrobiales	1	0	0	0	1	1	0	1	1	1	0	4	0	0	0	0	0
SEQF1092.1	GCA_000155955.1	Mitsuokella	multacida	Selenomonadales	1	1	1	0	1	1	1	1	1	0	1	0	0	0	0	0	0
SEQF1095.1	GCA_000016825.1	Limosilactobacillus	reuteri	Lactobacillales	1	0	0	0	0	0	0	1	0	0	0	3	0	0	0	0	0
SEQF1096.1	GCA_000016925.1	Mycobacterium	tuberculosis	Mycobacteriales	1	0	0	0	0	0	0	0	0	0	0	1	0	0	0	0	0
SEQF1099.1	GCA_000016445.1	Yersinia	pestis	Enterobacterales	1	0	1	1	1	1	1	1	1	1	0	0	0	0	0	0	0
SEQF1100.1	GCA_000014105.1	Neisseria	meningitidis	Neisseriales	0	1	0	1	1	1	1	1	1	0	1	0	0	0	0	0	0
SEQF1102.1	GCA_000092265.1	Moraxella	catarrhalis	Moraxellales	1	0	0	0	1	0	1	1	1	0	2	0	0	0	0	0	0
SEQF1103.1	GCA_000160055.1	Dialister	invisus	Veillonellales	1	0	0	1	1	1	0	1	1	1	0	0	0	0	0	0	0
SEQF1104.1	GCA_000159335.1	Lactobacillus	jensenii	Lactobacillales	0	0	0	0	0	0	0	0	0	0	0	3	0	0	0	0	0
SEQF1109.1	GCA_000020105.1	Neisseria	gonorrhoeae	Neisseriales	0	1	0	1	1	1	1	1	1	0	1	0	0	0	0	0	0
SEQF1111.1	GCA_000173335.1	Haemophilus	influenzae	Pasteurellales	1	0	0	1	1	1	1	1	1	0	1	0	0	0	0	0	0
SEQF1112.1	GCA_000173315.1	Haemophilus	influenzae	Pasteurellales	1	0	0	1	1	1	1	1	1	0	1	0	0	0	0	0	0
SEQF1116.1	GCA_000019985.1	Streptococcus	pneumoniae	Lactobacillales	1	0	0	0	1	1	1	1	1	0	0	0	0	0	0	1	0
SEQF1119.1	GCA_000020245.1	Helicobacter	pylori	Campylobacterales	1	0	0	0	1	1	1	1	1	0	1	0	0	0	0	0	0
SEQF1120.1	GCA_000168255.1	Limosilactobacillus	reuteri	Lactobacillales	1	0	0	0	0	0	0	1	0	0	0	3	0	0	0	0	0
SEQF1121.1	GCA_000010005.1	Limosilactobacillus	reuteri	Lactobacillales	1	0	0	0	0	0	0	1	0	0	0	3	0	0	0	0	0
SEQF1129.1	GCA_000016145.1	Mycobacterium	tuberculosis	Mycobacteriales	1	0	0	0	0	0	0	0	0	0	0	1	0	0	0	0	0
SEQF1130.1	GCA_000023625.1	Mycobacterium	tuberculosis	Mycobacteriales	1	0	0	0	0	0	0	0	0	0	0	1	0	0	0	0	0
SEQF1132.2	GCA_000154605.2	Mycobacterium	tuberculosis	Mycobacteriales	1	0	0	0	0	0	0	0	0	0	0	1	0	0	0	0	0
SEQF1137.1	GCA_000155125.1	Escherichia	coli	Enterobacterales	1	0	1	1	1	1	1	1	1	1	0	3	0	0	0	0	1
SEQF1139.2	GCA_000181675.2	Bacillus	anthracis	Bacillales	1	0	1	0	1	1	1	1	1	1	0	2	0	0	0	0	0
SEQF1140.1	GCA_000182055.1	Bacillus	anthracis	Bacillales	1	0	1	0	1	1	1	1	1	1	0	3	0	0	0	0	0
SEQF1141.1	GCA_000181915.1	Bacillus	anthracis	Bacillales	1	0	1	0	1	1	1	1	1	1	0	3	0	0	0	0	0
SEQF1142.1	GCA_000144405.1	Prevotella	melaninogenica	Bacteroidales	1	0	0	0	1	1	1	1	2	1	0	0	0	0	0	0	0
SEQF1143.1	GCA_000219895.1	Bacillus	anthracis	Bacillales	1	0	1	0	1	1	1	0	0	1	0	3	0	0	0	0	0
SEQF1150.1	GCA_000181935.1	Bacillus	anthracis	Bacillales	1	0	1	0	1	1	1	0	0	1	0	3	0	0	0	0	0
SEQF1151.1	GCA_000181995.1	Bacillus	anthracis	Bacillales	1	0	1	0	1	1	1	1	1	1	0	3	0	0	0	0	0
SEQF1153.1	GCA_000181835.1	Bacillus	anthracis	Bacillales	1	0	1	0	1	1	1	1	1	1	0	3	0	0	0	0	0
SEQF1159.1	GCA_000160015.1	Veillonella	dispar	Veillonellales	2	0	1	0	1	1	1	1	1	1	0	0	0	0	0	0	0
SEQF1160.1	GCA_000160475.1	Fusobacterium	periodonticum	Fusobacteriales	1	0	0	0	0	0	0	1	1	0	1	0	0	1	0	0	0
SEQF1161.1	GCA_000069205.1	Acinetobacter	baumannii	Moraxellales	1	0	0	1	1	0	1	1	1	1	1	0	0	0	0	0	0
SEQF1164.1	GCA_000069245.1	Acinetobacter	baumannii	Moraxellales	1	0	0	0	1	1	1	1	1	1	1	0	0	0	0	0	0
SEQF1165.1	GCA_000173955.1	Neisseria	subflava	Neisseriales	0	1	0	1	1	1	0	1	1	0	1	0	0	0	0	0	0
SEQF1166.2	GCA_000176755.2	Neisseria	elongata	Neisseriales	0	1	0	1	1	1	1	2	1	0	1	0	0	0	0	0	0
SEQF1167.1	GCA_000092025.1	Agrobacterium	tumefaciens	Hyphomicrobiales	1	0	1	0	1	1	0	1	1	1	0	3	0	0	0	0	0
SEQF1170.1	GCA_000009825.1	Alkalihalobacillus	clausii	Bacillales	1	0	1	0	1	1	1	1	2	1	0	3	0	0	1	0	0
SEQF1173.1	GCA_000186745.1	Bacillus	subtilis	Bacillales	1	1	1	0	1	1	1	1	1	1	0	0	0	0	0	0	0
SEQF1175.1	GCA_000173875.1	Neisseria	mucosa	Neisseriales	0	1	0	1	1	1	1	1	1	0	1	1	0	0	0	0	0
SEQF1177.2	GCA_000017725.2	Campylobacter	concisus	Campylobacterales	1	0	0	0	1	1	0	1	1	0	1	0	0	0	0	0	0
SEQF1178.2	GCA_000017465.2	Campylobacter	curvus	Campylobacterales	1	0	0	0	1	1	0	1	1	0	1	0	0	0	0	0	0
SEQF1179.2	GCA_000091085.2	Chlamydia	pneumoniae	Chlamydiales	0	0	0	0	0	0	0	1	0	0	0	0	0	0	1	0	0
SEQF1180.1	GCA_000008745.1	Chlamydia	pneumoniae	Chlamydiales	0	0	0	0	0	0	0	1	0	0	0	0	0	0	1	0	0
SEQF1181.1	GCA_000011165.1	Chlamydia	pneumoniae	Chlamydiales	0	0	0	0	0	0	0	1	0	0	0	0	0	0	1	0	0
SEQF1182.1	GCA_000007205.1	Chlamydia	pneumoniae	Chlamydiales	0	0	0	0	0	0	0	1	0	0	0	0	0	0	1	0	0
SEQF1183.1	GCA_000176735.1	Neisseria	polysaccharea	Neisseriales	0	1	0	1	1	1	1	1	1	0	1	0	0	0	0	0	0
SEQF1184.1	GCA_000195815.1	Corynebacterium	diphtheriae	Mycobacteriales	1	0	0	0	0	0	0	1	0	0	0	3	0	0	0	0	1
SEQF1185.1	GCA_000017665.1	Cronobacter	sakazakii	Enterobacterales	1	0	1	1	1	1	1	1	1	1	1	1	0	0	0	0	0
SEQF1186.1	GCA_000168095.1	Escherichia	coli	Enterobacterales	1	0	1	1	1	1	1	1	1	0	0	3	0	0	0	0	1
SEQF1187.1	GCA_000092365.1	Arcanobacterium	haemolyticum	Actinomycetales	1	0	0	0	0	0	0	1	0	0	0	0	0	0	0	0	0
SEQF1188.2	GCA_000167915.2	Escherichia	coli	Enterobacterales	1	0	1	1	1	1	1	1	1	1	0	3	0	0	0	0	0
SEQF1189.1	GCA_000026245.1	Escherichia	coli	Enterobacterales	1	0	1	1	1	1	1	1	1	1	0	3	0	0	0	0	1
SEQF1191.1	GCA_000017985.1	Escherichia	coli	Enterobacterales	1	0	1	1	1	1	1	1	1	1	1	3	0	0	0	0	0
SEQF1192.3	GCA_000167895.3	Escherichia	coli	Enterobacterales	1	0	1	0	1	1	1	1	1	0	0	3	0	0	0	0	1
SEQF1193.1	GCA_000167815.1	Escherichia	coli	Enterobacterales	1	0	1	1	1	1	1	1	1	1	0	3	0	0	0	0	1
SEQF1194.1	GCA_000007445.1	Escherichia	coli	Enterobacterales	1	0	1	1	1	1	1	1	1	1	0	2	0	0	0	0	1
SEQF1195.1	GCA_000173935.1	Neisseria	flavescens	Neisseriales	0	1	0	1	1	1	1	1	1	0	1	0	0	0	0	0	0
SEQF1196.1	GCA_000167875.1	Escherichia	coli	Enterobacterales	1	0	1	1	1	1	1	1	1	1	1	3	0	0	0	0	1
SEQF1197.1	GCA_000167855.1	Escherichia	coli	Enterobacterales	1	0	2	1	1	1	1	1	1	0	0	3	0	0	0	0	1
SEQF1198.1	GCA_000017745.1	Escherichia	coli	Enterobacterales	1	0	1	1	1	1	1	1	1	1	0	3	0	0	0	0	1
SEQF1199.1	GCA_000027125.1	Escherichia	coli	Enterobacterales	1	0	1	1	1	1	1	1	1	1	1	3	0	0	0	0	0
SEQF1200.1	GCA_000026305.1	Escherichia	coli	Enterobacterales	1	0	1	1	1	1	1	1	1	1	1	3	0	0	0	0	1
SEQF1203.1	GCA_000167835.1	Escherichia	coli	Enterobacterales	1	0	1	1	1	1	1	1	1	0	0	3	0	0	0	0	1
SEQF1205.1	GCA_000017765.1	Escherichia	coli	Enterobacterales	1	0	1	1	1	1	1	1	1	1	0	3	0	0	0	0	0
SEQF1206.1	GCA_000026265.1	Escherichia	coli	Enterobacterales	1	0	1	1	1	1	1	1	1	1	0	3	0	0	0	0	1
SEQF1207.1	GCA_000026345.1	Escherichia	coli	Enterobacterales	1	0	1	1	1	1	1	1	1	1	0	3	0	0	0	0	1
SEQF1208.2	GCA_000005845.2	Escherichia	coli	Enterobacterales	1	0	1	1	1	1	1	1	1	1	0	3	0	0	0	0	0
SEQF1213.1	GCA_000006665.1	Escherichia	coli	Enterobacterales	1	0	1	1	1	1	1	1	1	1	0	3	0	0	0	0	1
SEQF1217.2	GCA_000026285.2	Escherichia	coli	Enterobacterales	1	0	1	1	1	1	1	1	1	1	0	3	0	0	0	0	1
SEQF1218.2	GCA_000026325.2	Escherichia	coli	Enterobacterales	1	0	1	1	1	1	1	1	1	1	0	3	0	0	0	0	1
SEQF1219.1	GCA_000013265.1	Escherichia	coli	Enterobacterales	1	0	1	1	1	1	1	1	1	1	0	3	0	0	0	0	1
SEQF1220.1	GCA_000010245.1	Escherichia	coli	Enterobacterales	1	0	1	1	1	1	1	1	1	1	0	3	0	0	0	0	0
SEQF1221.1	GCA_000022985.1	Aggregatibacter	aphrophilus	Pasteurellales	1	0	0	1	1	1	1	1	1	0	1	0	0	0	0	0	0
SEQF1223.1	GCA_000169735.1	Haemophilus	influenzae	Pasteurellales	1	0	0	1	1	1	1	1	1	0	1	0	0	0	0	0	0
SEQF1224.1	GCA_000169855.1	Haemophilus	influenzae	Pasteurellales	2	0	0	0	1	1	1	1	1	0	1	0	0	0	0	0	0
SEQF1226.1	GCA_000169775.1	Haemophilus	influenzae	Pasteurellales	1	0	0	1	1	1	1	1	1	0	1	1	0	0	0	0	0
SEQF1227.1	GCA_000012185.1	Haemophilus	influenzae	Pasteurellales	1	0	0	1	1	1	1	1	1	0	1	0	0	0	0	0	0
SEQF1228.1	GCA_000169795.1	Haemophilus	influenzae	Pasteurellales	1	0	0	0	1	1	1	1	1	0	1	1	0	0	0	0	0
SEQF1231.1	GCA_000016465.1	Haemophilus	influenzae	Pasteurellales	1	0	0	1	1	1	1	1	1	0	1	0	0	0	0	0	0
SEQF1232.1	GCA_000016485.1	Haemophilus	influenzae	Pasteurellales	1	0	0	0	0	1	1	1	1	0	0	0	0	0	0	0	0
SEQF1233.1	GCA_000169815.1	Haemophilus	influenzae	Pasteurellales	2	0	0	1	1	1	1	1	1	0	1	0	0	0	0	0	0
SEQF1234.1	GCA_000169835.1	Haemophilus	influenzae	Pasteurellales	1	0	0	1	1	1	1	1	1	0	1	0	0	0	0	0	0
SEQF1235.1	GCA_000165575.1	Haemophilus	influenzae	Pasteurellales	1	0	0	1	1	1	1	1	1	0	1	0	0	0	0	0	0
SEQF1236.1	GCA_000165525.1	Haemophilus	influenzae	Pasteurellales	1	0	0	1	1	1	1	1	1	0	1	0	0	0	0	0	0
SEQF1237.1	GCA_000169755.1	Haemophilus	influenzae	Pasteurellales	1	0	0	1	1	1	1	1	2	0	1	1	0	0	0	0	0
SEQF1238.1	GCA_000210875.1	Haemophilus	influenzae	Pasteurellales	1	0	0	1	1	1	2	1	1	0	1	0	0	0	0	0	0
SEQF1239.1	GCA_000210895.1	Haemophilus	parainfluenzae	Pasteurellales	1	0	0	0	1	1	1	1	1	0	1	0	0	0	0	0	0
SEQF1240.1	GCA_000008525.1	Helicobacter	pylori	Campylobacterales	1	0	0	0	1	1	1	1	1	0	1	0	0	0	0	0	0
SEQF1243.1	GCA_000023805.1	Helicobacter	pylori	Campylobacterales	1	0	0	0	1	1	1	1	1	0	1	0	0	0	0	0	0
SEQF1244.1	GCA_000013245.1	Helicobacter	pylori	Campylobacterales	1	0	0	0	1	1	1	1	1	0	1	0	0	0	0	0	0
SEQF1245.1	GCA_000008785.1	Helicobacter	pylori	Campylobacterales	1	0	0	0	1	1	1	1	1	0	1	0	0	0	0	0	0
SEQF1246.1	GCA_000026485.1	Lacticaseibacillus	casei	Lactobacillales	0	0	0	0	0	0	0	1	1	1	0	1	0	0	0	1	0
SEQF1247.1	GCA_000022225.1	Escherichia	coli	Enterobacterales	1	0	1	1	1	1	1	1	1	1	0	3	0	0	0	0	1
SEQF1249.1	GCA_000019565.1	Klebsiella	pneumoniae	Enterobacterales	1	0	1	1	1	1	1	1	1	1	0	2	0	0	0	0	0
SEQF1250.1	GCA_000016305.1	Klebsiella	pneumoniae	Enterobacterales	1	0	1	1	1	1	1	1	1	1	0	2	0	0	0	0	0
SEQF1252.1	GCA_000014465.1	Levilactobacillus	brevis	Lactobacillales	0	0	0	0	0	0	0	1	1	0	0	3	0	0	0	0	0
SEQF1254.1	GCA_000014525.1	Lacticaseibacillus	paracasei	Lactobacillales	0	0	0	0	0	0	0	1	1	1	0	0	0	0	0	1	0
SEQF1255.1	GCA_000014425.1	Lactobacillus	gasseri	Lactobacillales	0	0	0	0	0	0	0	0	0	0	0	1	0	0	0	0	0
SEQF1257.2	GCA_000173255.2	Lacticaseibacillus	rhamnosus	Lactobacillales	0	0	0	0	0	0	0	1	1	1	0	1	0	0	0	0	0
SEQF1259.1	GCA_000008925.1	Ligilactobacillus	salivarius	Lactobacillales	0	0	0	0	0	0	0	1	1	0	1	2	0	0	0	1	1
SEQF1260.1	GCA_000159255.1	Enterococcus	faecalis	Lactobacillales	1	0	0	0	0	0	0	1	1	1	0	2	0	0	0	1	1
SEQF1261.1	GCA_000173995.1	Neisseria	lactamica	Neisseriales	0	1	0	1	1	1	1	1	1	0	1	0	0	0	0	0	0
SEQF1262.2	GCA_000155515.2	Lacticaseibacillus	paracasei	Lactobacillales	0	0	0	0	0	0	0	1	1	1	0	0	0	0	0	1	0
SEQF1263.1	GCA_000186005.1	Mycoplasmopsis	fermentans	Metamycoplasmataceae	0	0	0	0	0	0	0	0	0	0	0	0	0	0	0	0	0
SEQF1264.1	GCA_000174655.1	Neisseria	sicca	Neisseriales	0	1	0	1	1	1	0	1	1	0	1	0	0	0	0	0	0
SEQF1265.1	GCA_000209735.1	Mycoplasmopsis	fermentans	Metamycoplasmataceae	0	0	0	0	0	0	0	0	0	0	0	0	0	0	0	0	0
SEQF1267.1	GCA_000027325.1	Mycoplasma	genitalium	Mycoplasmatales	0	0	0	0	0	0	0	0	0	0	0	0	0	0	0	0	0
SEQF1271.1	GCA_000027345.1	Mycoplasma	pneumoniae	Mycoplasmatales	0	0	0	0	0	0	0	0	0	0	0	0	0	0	0	0	0
SEQF1272.1	GCA_000006845.1	Neisseria	gonorrhoeae	Neisseriales	0	1	0	1	1	1	1	1	1	0	1	0	0	0	0	0	0
SEQF1275.1	GCA_000009465.1	Neisseria	meningitidis	Neisseriales	0	1	0	1	1	1	1	1	1	0	1	0	0	0	0	0	0
SEQF1276.1	GCA_000008805.1	Neisseria	meningitidis	Neisseriales	0	1	0	1	1	1	1	1	1	0	1	0	0	0	0	0	0
SEQF1277.1	GCA_000026965.1	Neisseria	meningitidis	Neisseriales	0	1	0	1	1	1	1	1	1	0	1	0	0	0	0	0	0
SEQF1283.1	GCA_000009105.1	Neisseria	meningitidis	Neisseriales	0	1	0	1	1	1	1	1	1	0	1	0	0	0	0	0	0
SEQF1286.1	GCA_000008345.1	Cutibacterium	acnes	Propionibacteriales	1	0	0	0	0	0	0	1	0	0	0	1	0	0	0	0	0
SEQF1287.1	GCA_000023905.1	Leptotrichia	buccalis	Fusobacteriales	1	0	0	0	0	0	0	1	1	0	1	1	0	1	0	0	0
SEQF1289.1	GCA_000069965.1	Proteus	mirabilis	Enterobacterales	1	0	1	1	1	1	1	1	1	1	0	0	0	0	0	0	0
SEQF1295.1	GCA_000017205.1	Pseudomonas	aeruginosa	Pseudomonadales	2	0	1	1	1	1	1	1	1	1	0	1	0	0	0	0	0
SEQF1297.1	GCA_000006765.1	Pseudomonas	aeruginosa	Pseudomonadales	2	0	1	0	1	1	1	1	1	1	0	1	0	0	0	0	0
SEQF1298.1	GCA_000014625.1	Pseudomonas	aeruginosa	Pseudomonadales	2	0	1	1	1	1	1	1	1	1	0	1	0	0	0	0	0
SEQF1300.1	GCA_000012265.1	Pseudomonas	fluorescens	Pseudomonadales	3	0	1	1	2	1	1	1	1	1	0	1	0	0	0	0	0
SEQF1301.1	GCA_000012445.1	Pseudomonas	fluorescens	Pseudomonadales	2	0	1	1	1	1	1	1	1	1	0	1	0	0	0	0	0
SEQF1302.1	GCA_000009225.1	Pseudomonas	fluorescens	Pseudomonadales	2	0	1	1	1	1	1	1	1	1	0	1	0	0	0	0	0
SEQF1303.1	GCA_000013785.1	Pseudomonas	stutzeri	Pseudomonadales	2	0	1	1	1	1	1	1	1	1	0	0	0	0	0	0	0
SEQF1310.1	GCA_000009005.1	Staphylococcus	aureus	Bacillales	0	1	1	0	1	1	1	1	1	1	1	1	0	0	1	0	0
SEQF1311.1	GCA_000012045.1	Staphylococcus	aureus	Bacillales	0	1	1	0	1	1	1	1	1	1	1	1	0	0	1	0	0
SEQF1312.1	GCA_000017125.1	Staphylococcus	aureus	Bacillales	0	1	1	0	1	1	1	1	1	1	1	1	0	0	1	0	0
SEQF1313.1	GCA_000016805.1	Staphylococcus	aureus	Bacillales	0	1	1	0	1	1	1	1	1	1	1	1	0	0	1	0	0
SEQF1314.1	GCA_000011505.1	Staphylococcus	aureus	Bacillales	0	1	1	0	1	1	1	1	1	1	1	1	0	0	1	0	0
SEQF1315.1	GCA_000011525.1	Staphylococcus	aureus	Bacillales	0	1	1	0	1	1	1	1	1	1	1	1	0	0	1	0	0
SEQF1316.1	GCA_000009665.1	Staphylococcus	aureus	Bacillales	0	1	1	0	1	1	1	1	1	1	1	1	0	0	1	0	0
SEQF1317.1	GCA_000011265.1	Staphylococcus	aureus	Bacillales	0	1	1	0	1	1	1	1	1	1	1	1	0	0	1	0	0
SEQF1318.1	GCA_000009645.1	Staphylococcus	aureus	Bacillales	0	1	1	0	1	1	1	1	1	1	1	1	0	0	1	0	0
SEQF1319.1	GCA_000013425.1	Staphylococcus	aureus	Bacillales	0	1	1	0	1	1	1	1	1	1	1	1	0	0	1	0	0
SEQF1320.1	GCA_000013465.1	Staphylococcus	aureus	Bacillales	0	1	1	0	1	1	1	1	1	1	1	1	0	0	1	0	0
SEQF1322.1	GCA_000007645.1	Staphylococcus	epidermidis	Bacillales	0	1	1	0	1	1	1	1	1	1	1	1	0	0	1	0	0
SEQF1324.1	GCA_000011925.1	Staphylococcus	epidermidis	Bacillales	0	1	1	0	1	1	1	1	1	1	1	1	0	0	1	0	0
SEQF1326.1	GCA_000246795.1	Treponema	pallidum	Spirochaetales	0	0	0	0	0	0	0	0	0	0	0	0	0	0	0	0	0
SEQF1328.1	GCA_000246775.1	Treponema	pallidum	Spirochaetales	0	0	0	0	0	0	0	0	0	0	0	0	0	0	0	0	0
SEQF1329.1	GCA_000072485.1	Stenotrophomonas	maltophilia	Xanthomonadales	1	0	1	0	1	1	1	1	1	1	1	2	0	0	0	0	0
SEQF1330.1	GCA_000020665.1	Stenotrophomonas	maltophilia	Xanthomonadales	1	0	1	0	1	1	1	1	1	1	1	2	0	0	0	0	0
SEQF1331.1	GCA_000167715.1	Streptococcus	agalactiae	Lactobacillales	1	0	0	0	0	0	0	1	1	1	0	3	0	0	0	0	2
SEQF1332.1	GCA_000007265.1	Streptococcus	agalactiae	Lactobacillales	1	0	0	0	0	0	0	1	1	1	1	1	0	0	0	0	1
SEQF1333.1	GCA_000167735.1	Streptococcus	agalactiae	Lactobacillales	1	0	0	0	0	0	0	1	1	1	1	1	0	0	0	0	1
SEQF1334.1	GCA_000012705.1	Streptococcus	agalactiae	Lactobacillales	1	0	0	0	0	0	0	1	1	1	1	1	0	0	0	0	1
SEQF1335.1	GCA_000167755.1	Streptococcus	agalactiae	Lactobacillales	1	0	0	0	0	0	0	2	1	1	1	1	0	0	0	0	1
SEQF1336.1	GCA_000167775.1	Streptococcus	agalactiae	Lactobacillales	1	0	0	0	0	0	0	1	1	1	1	2	0	0	0	0	1
SEQF1337.1	GCA_000167795.1	Streptococcus	agalactiae	Lactobacillales	1	0	0	0	0	0	0	1	1	1	1	1	0	0	0	0	1
SEQF1338.1	GCA_000196055.1	Streptococcus	agalactiae	Lactobacillales	1	0	0	0	0	0	0	1	1	1	1	1	0	0	0	0	1
SEQF1341.1	GCA_000147095.1	Streptococcus	pneumoniae	Lactobacillales	1	0	0	0	1	1	0	1	1	0	1	0	0	0	0	1	0
SEQF1342.2	GCA_000014365.2	Streptococcus	pneumoniae	Lactobacillales	1	0	0	0	0	1	1	1	1	0	0	0	0	0	0	1	0
SEQF1343.1	GCA_000210975.1	Streptococcus	pneumoniae	Lactobacillales	1	0	0	0	1	1	1	1	1	0	0	0	0	0	0	0	0
SEQF1344.1	GCA_000210935.1	Streptococcus	pneumoniae	Lactobacillales	1	0	0	0	1	1	1	1	1	0	0	0	0	0	0	1	0
SEQF1345.1	GCA_000210955.1	Streptococcus	pneumoniae	Lactobacillales	1	0	0	0	1	1	1	1	1	0	1	0	0	0	0	1	0
SEQF1346.1	GCA_000007045.1	Streptococcus	pneumoniae	Lactobacillales	1	0	0	0	1	1	1	1	1	0	0	0	0	0	0	1	0
SEQF1349.1	GCA_000006885.1	Streptococcus	pneumoniae	Lactobacillales	1	0	0	0	0	1	1	1	1	0	0	0	0	0	0	1	0
SEQF1350.1	GCA_000246755.1	Treponema	pallidum	Spirochaetales	0	0	0	0	0	0	0	0	0	0	0	0	0	0	0	0	0
SEQF1351.1	GCA_000172935.1	Helicobacter	pylori	Campylobacterales	1	0	0	0	0	1	1	1	1	0	0	0	0	0	0	0	0
SEQF1352.1	GCA_000172955.1	Helicobacter	pylori	Campylobacterales	1	0	0	0	1	1	1	1	1	0	1	0	0	0	0	0	0
SEQF1355.1	GCA_000009385.1	Streptococcus	pyogenes	Lactobacillales	1	0	0	0	0	0	0	1	1	1	1	0	0	0	0	0	0
SEQF1356.1	GCA_000013505.1	Streptococcus	pyogenes	Lactobacillales	1	0	0	0	0	0	0	1	1	1	1	0	0	0	0	0	0
SEQF1357.1	GCA_000011665.1	Streptococcus	pyogenes	Lactobacillales	1	0	0	0	0	0	0	1	1	1	1	0	0	0	0	0	0
SEQF1358.1	GCA_000013545.1	Streptococcus	pyogenes	Lactobacillales	1	0	0	0	0	0	0	1	1	1	1	0	0	0	0	0	0
SEQF1359.1	GCA_000013525.1	Streptococcus	pyogenes	Lactobacillales	1	0	0	0	0	0	0	1	1	1	1	0	0	0	0	0	0
SEQF1360.1	GCA_000007425.1	Streptococcus	pyogenes	Lactobacillales	1	0	0	0	0	0	0	1	1	1	1	0	0	0	0	0	0
SEQF1361.2	GCA_000011765.2	Streptococcus	pyogenes	Lactobacillales	1	0	0	0	0	0	0	1	1	1	1	0	0	0	0	0	0
SEQF1362.1	GCA_000012165.1	Streptococcus	pyogenes	Lactobacillales	1	0	0	0	0	0	0	1	1	1	1	0	0	0	0	0	0
SEQF1363.1	GCA_000007285.1	Streptococcus	pyogenes	Lactobacillales	1	0	0	0	0	0	0	1	1	1	1	0	0	0	0	0	0
SEQF1364.1	GCA_000013485.1	Streptococcus	pyogenes	Lactobacillales	1	0	0	0	0	0	0	1	1	1	1	0	0	0	0	0	0
SEQF1365.1	GCA_000011285.1	Streptococcus	pyogenes	Lactobacillales	1	0	0	0	0	0	0	1	1	1	1	0	0	0	0	0	0
SEQF1366.1	GCA_000253315.1	Streptococcus	salivarius	Lactobacillales	1	0	1	0	1	1	1	1	1	1	0	0	0	0	0	1	0
SEQF1367.1	GCA_000253335.1	Streptococcus	salivarius	Lactobacillales	1	0	1	0	1	1	1	1	1	1	0	0	0	0	0	1	0
SEQF1368.1	GCA_000160515.1	Lactobacillus	crispatus	Lactobacillales	0	0	0	0	0	0	0	0	0	0	0	2	0	0	0	0	0
SEQF1369.2	GCA_000159455.2	Limosilactobacillus	reuteri	Lactobacillales	1	0	0	0	0	0	0	1	0	0	0	3	0	0	0	0	0
SEQF1376.1	GCA_000010385.1	Escherichia	coli	Enterobacterales	1	0	1	1	1	1	1	1	1	1	0	3	0	0	0	0	1
SEQF1380.2	GCA_000006785.2	Streptococcus	pyogenes	Lactobacillales	1	0	0	0	0	0	0	1	1	1	1	0	0	0	0	0	0
SEQF1382.1	GCA_000091645.1	Streptococcus	mutans	Lactobacillales	1	0	0	0	1	1	1	1	1	1	0	0	0	0	0	0	0
SEQF1384.1	GCA_000015425.1	Acinetobacter	baumannii	Moraxellales	1	0	0	0	1	0	1	1	1	1	1	0	0	0	0	0	0
SEQF1385.1	GCA_000024445.1	Bifidobacterium	dentium	Bifidobacteriales	1	0	0	0	0	0	0	1	0	0	0	2	0	0	0	0	0
SEQF1388.1	GCA_000154225.1	Schaalia	odontolytica	Actinomycetales	1	0	0	0	0	0	0	1	0	0	0	0	0	0	0	0	0
SEQF1393.2	GCA_000147675.2	Peptostreptococcus	stomatis	Peptostreptococcales	0	0	0	0	0	0	0	1	1	0	1	0	0	1	0	1	0
SEQF1395.1	GCA_000023345.1	Variovorax	paradoxus	Burkholderiales	1	0	1	1	1	0	1	1	1	1	0	2	0	0	0	0	0
SEQF1398.1	GCA_000018445.1	Acinetobacter	baumannii	Moraxellales	1	0	0	1	1	1	1	1	1	1	1	0	0	0	0	0	0
SEQF1399.1	GCA_000024145.1	Chlamydia	pneumoniae	Chlamydiales	0	0	0	0	0	0	0	1	0	0	0	0	0	0	1	0	0
SEQF1400.1	GCA_000170075.1	Streptococcus	pneumoniae	Lactobacillales	1	0	0	0	1	1	1	1	1	0	1	0	0	0	0	1	0
SEQF1401.1	GCA_000170095.1	Streptococcus	pneumoniae	Lactobacillales	1	0	0	0	1	1	0	1	1	0	0	0	0	0	0	1	0
SEQF1402.1	GCA_000170115.1	Streptococcus	pneumoniae	Lactobacillales	1	0	0	0	1	1	1	1	1	0	1	0	0	0	0	1	0
SEQF1403.1	GCA_000170135.1	Streptococcus	pneumoniae	Lactobacillales	1	0	0	0	1	1	1	1	1	0	1	0	0	0	0	1	0
SEQF1404.1	GCA_000170155.1	Streptococcus	pneumoniae	Lactobacillales	1	0	0	0	1	1	0	1	1	0	1	0	0	0	0	1	0
SEQF1405.1	GCA_000170015.1	Streptococcus	pneumoniae	Lactobacillales	1	0	0	0	1	1	1	1	1	0	1	0	0	0	0	1	0
SEQF1406.1	GCA_000170035.1	Streptococcus	pneumoniae	Lactobacillales	1	0	0	0	1	1	1	1	1	0	1	0	0	0	0	1	0
SEQF1407.1	GCA_000170055.1	Streptococcus	pneumoniae	Lactobacillales	1	0	0	0	0	1	1	1	1	0	0	0	0	0	0	1	0
SEQF1408.2	GCA_000008865.2	Escherichia	coli	Enterobacterales	1	0	1	1	1	1	1	1	1	1	0	3	0	0	0	0	1
SEQF1413.1	GCA_000018665.1	Delftia	acidovorans	Burkholderiales	1	0	1	1	1	1	1	1	1	1	1	0	0	0	0	0	0
SEQF1419.1	GCA_000246815.1	Treponema	pallidum	Spirochaetales	0	0	0	0	0	0	0	0	0	0	0	0	0	0	0	0	0
SEQF1429.1	GCA_000019385.1	Escherichia	coli	Enterobacterales	1	0	1	1	1	1	1	1	1	1	0	2	0	0	0	0	0
SEQF1430.1	GCA_000014845.1	Escherichia	coli	Enterobacterales	1	0	1	1	1	1	1	1	1	1	1	3	0	0	0	0	1
SEQF1431.1	GCA_000010465.1	Staphylococcus	aureus	Bacillales	0	1	1	0	1	1	1	1	1	1	1	1	0	0	1	0	0
SEQF1433.1	GCA_000013305.1	Escherichia	coli	Enterobacterales	1	0	1	1	1	1	1	1	1	1	0	3	0	0	0	0	1
SEQF1449.1	GCA_000160155.1	Enterococcus	faecalis	Lactobacillales	1	0	0	0	0	0	0	1	1	1	0	2	0	0	0	1	1
SEQF1451.1	GCA_000163695.1	Bacteroidales	bacterium_HMT_274	Bacteroidota	1	0	0	0	0	0	0	1	2	1	0	0	0	0	0	0	0
SEQF1452.2	GCA_000163055.2	Prevotella	nanceiensis	Bacteroidales	2	0	0	1	1	1	1	1	2	1	0	0	0	0	0	0	0
SEQF1456.2	GCA_000168695.2	Listeria	monocytogenes	Bacillales	1	0	0	0	0	0	0	1	1	1	0	0	0	0	0	0	0
SEQF1457.1	GCA_000017405.1	Brucella	anthropi	Hyphomicrobiales	1	0	1	0	1	1	0	1	1	1	0	2	0	0	0	0	0
SEQF1459.1	GCA_000168615.1	Listeria	monocytogenes	Bacillales	1	0	0	0	0	0	0	1	1	1	0	0	0	0	0	0	0
SEQF1468.1	GCA_000170655.1	Saccharibacteria	bacterium_HMT_348	Saccharibacteria	0	0	0	0	0	0	0	0	0	0	0	0	0	0	0	0	0
SEQF1469.1	GCA_000170675.1	Saccharibacteria	bacterium_HMT_348	Saccharibacteria	0	0	0	0	0	0	0	0	0	0	0	0	0	0	0	0	0
SEQF1472.1	GCA_000090945.1	Peptoniphilus	sp._HMT_386	Tissierellales	1	0	0	0	0	0	0	1	1	0	1	0	0	0	0	0	0
SEQF1477.1	GCA_000162415.1	Prevotella	sp._HMT_317	Bacteroidales	1	0	0	0	1	1	1	1	2	1	0	0	0	0	0	0	0
SEQF1478.1	GCA_000209465.1	Lachnoanaerobaculum	umeaense	Lachnospirales	0	0	0	0	0	0	0	1	1	0	1	0	0	0	0	1	0
SEQF1479.1	GCA_000168395.1	Listeria	monocytogenes	Bacillales	1	0	0	0	0	0	0	1	1	1	0	0	0	0	0	0	0
SEQF1480.1	GCA_000023845.1	Cryptobacterium	curtum	Eggerthellales	1	0	0	0	1	1	0	1	1	0	1	1	0	0	0	0	0
SEQF1481.1	GCA_000155995.1	Enterobacter	cancerogenus	Enterobacterales	1	0	1	1	1	1	1	1	1	1	1	1	0	0	0	0	0
SEQF1482.1	GCA_000006865.1	Lactococcus	lactis	Lactobacillales	1	0	0	0	0	0	0	1	1	0	1	0	0	0	0	0	0
SEQF1485.2	GCA_000021245.2	Acinetobacter	baumannii	Moraxellales	1	0	0	1	1	1	1	1	1	1	1	0	0	0	0	0	0
SEQF1486.2	GCA_000226275.2	Acinetobacter	baumannii	Moraxellales	1	0	0	1	1	1	1	1	1	1	1	0	0	0	0	0	0
SEQF1487.1	GCA_000171475.1	Haemophilus	influenzae	Pasteurellales	0	0	0	0	0	1	2	1	2	0	1	0	0	0	0	0	0
SEQF1488.1	GCA_000171435.1	Staphylococcus	aureus	Bacillales	0	1	1	0	1	1	1	1	1	1	0	1	0	0	0	0	0
SEQF1489.1	GCA_000171455.1	Staphylococcus	aureus	Bacillales	0	1	1	0	1	1	1	1	1	1	0	0	0	0	0	0	0
SEQF1490.1	GCA_000010445.1	Staphylococcus	aureus	Bacillales	0	1	1	0	1	1	1	1	1	1	1	1	0	0	1	0	0
SEQF1491.1	GCA_000153665.1	Staphylococcus	aureus	Bacillales	0	1	1	0	1	1	1	1	1	1	1	1	0	0	1	0	0
SEQF1492.1	GCA_000017085.1	Staphylococcus	aureus	Bacillales	0	1	1	0	1	1	1	1	1	1	1	1	0	0	1	0	0
SEQF1493.3	GCA_000019245.3	Lacticaseibacillus	casei	Lactobacillales	0	0	0	0	0	0	0	1	1	1	0	0	0	0	0	1	0
SEQF1494.1	GCA_000018125.1	Streptococcus	pyogenes	Lactobacillales	1	0	0	0	0	0	0	1	1	1	1	0	0	0	0	0	0
SEQF1495.2	GCA_000172575.2	Enterococcus	faecalis	Lactobacillales	1	0	0	0	0	0	0	1	1	1	0	2	0	0	0	1	1
SEQF1496.1	GCA_000024945.1	Veillonella	parvula	Veillonellales	2	0	1	0	1	1	1	1	1	1	0	0	0	0	0	0	0
SEQF1497.1	GCA_000172135.1	Bifidobacterium	dentium	Bifidobacteriales	1	0	0	0	0	0	0	1	0	0	0	2	0	0	0	0	0
SEQF1498.1	GCA_000024265.1	Eggerthella	lenta	Eggerthellales	1	0	0	0	0	0	0	1	1	0	1	0	0	0	0	1	0
SEQF1499.1	GCA_000017825.1	Treponema	pallidum	Spirochaetales	0	0	0	0	0	0	0	0	0	0	0	0	0	0	0	0	0
SEQF1500.1	GCA_000009425.1	Lactococcus	lactis	Lactobacillales	1	0	0	0	0	0	0	1	1	0	1	0	0	0	0	0	0
SEQF1501.1	GCA_000014545.1	Lactococcus	lactis	Lactobacillales	1	0	0	0	0	0	0	1	1	0	1	0	0	0	0	1	0
SEQF1503.2	GCA_000022665.2	Escherichia	coli	Enterobacterales	1	0	1	1	1	1	1	1	1	1	0	3	0	0	0	0	0
SEQF1504.1	GCA_000019425.1	Escherichia	coli	Enterobacterales	1	0	1	1	1	1	1	1	1	1	0	4	0	0	0	0	0
SEQF1507.1	GCA_000181775.1	Escherichia	coli	Enterobacterales	1	0	1	1	1	1	1	1	1	1	0	3	0	0	0	0	1
SEQF1508.1	GCA_000181755.1	Escherichia	coli	Enterobacterales	1	0	1	1	1	1	1	1	1	1	0	3	0	0	0	0	1
SEQF1509.1	GCA_000171955.1	Escherichia	coli	Enterobacterales	1	0	1	1	1	1	1	1	1	1	0	3	0	0	0	0	1
SEQF1510.1	GCA_000171935.1	Escherichia	coli	Enterobacterales	1	0	1	1	1	1	1	1	1	0	0	3	0	0	0	0	1
SEQF1511.1	GCA_000021125.1	Escherichia	coli	Enterobacterales	1	0	1	1	1	1	1	1	1	1	0	3	0	0	0	0	1
SEQF1512.1	GCA_000171915.1	Escherichia	coli	Enterobacterales	1	0	1	0	1	1	1	1	1	0	0	3	0	0	0	0	1
SEQF1513.1	GCA_000181735.1	Escherichia	coli	Enterobacterales	1	0	1	1	1	1	1	1	1	1	0	3	0	0	0	0	1
SEQF1514.1	GCA_000171975.1	Escherichia	coli	Enterobacterales	1	0	1	1	1	1	1	1	1	0	0	3	0	0	0	0	1
SEQF1515.1	GCA_000171995.1	Escherichia	coli	Enterobacterales	1	0	1	1	1	1	1	1	1	1	0	3	0	0	0	0	1
SEQF1516.1	GCA_000172015.1	Escherichia	coli	Enterobacterales	1	0	1	1	1	0	0	1	1	0	0	3	0	0	0	0	1
SEQF1517.1	GCA_000172055.1	Escherichia	coli	Enterobacterales	1	0	1	1	1	1	1	1	1	0	0	3	0	0	0	0	1
SEQF1518.1	GCA_000172035.1	Escherichia	coli	Enterobacterales	1	0	1	1	1	1	1	1	1	1	0	3	0	0	0	0	1
SEQF1519.1	GCA_000019645.1	Escherichia	coli	Enterobacterales	1	0	1	1	1	1	1	1	1	1	0	4	0	0	0	0	1
SEQF1523.1	GCA_000018965.1	Streptococcus	pneumoniae	Lactobacillales	1	0	0	0	1	1	1	1	1	0	1	0	0	0	0	1	0
SEQF1524.1	GCA_000171675.1	Streptococcus	pneumoniae	Lactobacillales	1	0	0	0	1	1	1	1	1	0	0	0	0	0	0	1	0
SEQF1525.1	GCA_000171595.1	Streptococcus	pneumoniae	Lactobacillales	1	0	0	0	1	1	1	1	1	0	0	0	0	0	0	1	0
SEQF1526.1	GCA_000171575.1	Streptococcus	pneumoniae	Lactobacillales	1	0	0	0	1	1	1	1	1	0	0	0	0	0	0	1	0
SEQF1527.1	GCA_000171695.1	Streptococcus	pneumoniae	Lactobacillales	1	0	0	0	0	1	1	1	1	0	0	0	0	0	0	1	0
SEQF1528.1	GCA_000019265.1	Streptococcus	pneumoniae	Lactobacillales	1	0	0	0	1	1	1	1	1	0	0	0	0	0	0	1	0
SEQF1529.1	GCA_000018985.1	Streptococcus	pneumoniae	Lactobacillales	1	0	0	0	1	1	1	1	1	0	0	0	0	0	0	1	0
SEQF1530.1	GCA_000171715.1	Streptococcus	pneumoniae	Lactobacillales	1	0	0	0	1	1	1	1	1	0	0	0	0	0	0	1	0
SEQF1531.1	GCA_000171655.1	Streptococcus	pneumoniae	Lactobacillales	1	0	0	0	1	1	1	1	1	0	0	0	0	0	0	1	0
SEQF1532.1	GCA_000019025.1	Streptococcus	pneumoniae	Lactobacillales	1	0	0	0	1	1	1	1	1	0	0	0	0	0	0	1	0
SEQF1533.1	GCA_000010145.1	Limosilactobacillus	fermentum	Lactobacillales	1	0	0	0	0	0	0	0	0	0	0	2	0	0	0	0	0
SEQF1536.1	GCA_000173215.1	Streptococcus	pneumoniae	Lactobacillales	1	0	0	0	1	1	0	1	1	0	0	0	0	0	0	1	0
SEQF1538.1	GCA_000010505.1	Porphyromonas	gingivalis	Bacteroidales	1	0	0	1	1	1	1	1	2	1	0	0	0	0	0	0	0
SEQF1543.1	GCA_000168475.1	Listeria	monocytogenes	Bacillales	1	0	0	0	0	0	0	1	1	1	0	0	0	0	0	0	0
SEQF1544.1	GCA_000168515.1	Listeria	monocytogenes	Bacillales	1	0	0	0	0	0	0	1	1	1	0	0	0	0	0	0	0
SEQF1545.1	GCA_000168535.1	Listeria	monocytogenes	Bacillales	1	0	0	0	0	0	0	1	1	1	0	0	0	0	0	0	0
SEQF1546.1	GCA_000168555.1	Listeria	monocytogenes	Bacillales	1	0	0	0	0	0	0	1	1	1	0	0	0	0	0	0	0
SEQF1547.2	GCA_000168575.2	Listeria	monocytogenes	Bacillales	1	0	0	0	0	0	0	1	1	1	0	0	0	0	0	0	0
SEQF1548.2	GCA_000168595.2	Listeria	monocytogenes	Bacillales	1	0	0	0	0	0	0	1	1	1	0	0	0	0	0	0	0
SEQF1549.1	GCA_000168815.1	Listeria	monocytogenes	Bacillales	1	0	0	0	0	0	0	1	1	1	0	0	0	0	0	0	0
SEQF1551.2	GCA_000168635.2	Listeria	monocytogenes	Bacillales	1	0	0	0	0	0	0	1	1	1	0	0	0	0	0	0	0
SEQF1552.1	GCA_000168655.1	Listeria	monocytogenes	Bacillales	1	0	0	0	0	0	0	1	1	1	0	0	0	0	0	0	0
SEQF1555.1	GCA_000018805.1	Yersinia	pestis	Enterobacterales	1	0	1	1	1	1	1	1	1	1	0	0	0	0	0	0	0
SEQF1556.2	GCA_000181455.2	Yersinia	pestis	Enterobacterales	1	0	1	1	1	1	1	1	1	1	0	0	0	0	0	0	0
SEQF1558.1	GCA_000182485.1	Yersinia	pestis	Enterobacterales	1	0	1	1	1	1	1	1	1	1	0	0	0	0	0	0	0
SEQF1559.1	GCA_000182545.1	Yersinia	pestis	Enterobacterales	1	0	1	1	1	1	1	1	1	1	0	0	0	0	0	0	0
SEQF1560.1	GCA_000169675.1	Yersinia	pestis	Enterobacterales	1	0	1	1	1	1	1	1	1	1	0	0	0	0	0	0	0
SEQF1561.1	GCA_000169695.1	Yersinia	pestis	Enterobacterales	1	0	1	1	1	1	1	1	1	1	0	0	0	0	0	0	0
SEQF1562.1	GCA_000169615.1	Yersinia	pestis	Enterobacterales	1	0	1	1	1	1	1	1	1	1	0	0	0	0	0	0	0
SEQF1563.1	GCA_000169655.1	Yersinia	pestis	Enterobacterales	1	0	1	1	1	1	1	1	1	1	0	0	0	0	0	0	0
SEQF1564.1	GCA_000186725.1	Yersinia	pestis	Enterobacterales	1	0	1	1	1	1	1	1	1	1	0	0	0	0	0	0	0
SEQF1565.1	GCA_000170275.1	Yersinia	pestis	Enterobacterales	1	0	1	1	1	1	1	1	1	1	0	0	0	0	0	0	0
SEQF1566.1	GCA_000182505.1	Yersinia	pestis	Enterobacterales	1	0	1	1	1	1	1	1	1	1	0	0	0	0	0	0	0
SEQF1567.2	GCA_000168235.2	Yersinia	pestis	Enterobacterales	1	0	1	1	1	1	1	1	1	1	0	0	0	0	0	0	0
SEQF1568.1	GCA_000169635.1	Yersinia	pestis	Enterobacterales	1	0	1	1	1	1	1	1	1	1	0	0	0	0	0	0	0
SEQF1569.1	GCA_000182525.1	Yersinia	pestis	Enterobacterales	1	0	1	1	1	1	1	1	1	1	0	0	0	0	0	0	0
SEQF1572.1	GCA_000023665.1	Escherichia	coli	Enterobacterales	1	0	1	1	1	1	1	1	1	1	0	3	0	0	0	0	0
SEQF1574.1	GCA_000021185.1	Listeria	monocytogenes	Bacillales	1	0	0	0	0	0	0	1	1	1	0	0	0	0	0	0	0
SEQF1575.1	GCA_000174175.1	Campylobacter	rectus	Campylobacterales	1	0	0	0	1	1	0	1	1	0	1	0	0	0	0	0	0
SEQF1576.1	GCA_000173675.1	Capnocytophaga	sputigena	Flavobacteriales	1	0	0	1	0	0	0	1	1	0	1	0	0	0	0	0	0
SEQF1577.1	GCA_000025205.1	Gardnerella	vaginalis	Bifidobacteriales	0	0	0	0	0	0	0	1	0	0	0	3	0	0	0	0	0
SEQF1587.1	GCA_000173195.1	Streptococcus	pneumoniae	Lactobacillales	1	0	0	0	1	1	0	1	1	0	0	0	0	0	0	1	0
SEQF1588.1	GCA_000173175.1	Streptococcus	pneumoniae	Lactobacillales	1	0	0	0	1	1	0	1	1	0	0	0	0	0	0	1	0
SEQF1589.1	GCA_000173275.1	Streptococcus	pneumoniae	Lactobacillales	1	0	0	0	1	1	0	1	1	0	0	0	0	0	0	1	0
SEQF1590.1	GCA_000173295.1	Streptococcus	pneumoniae	Lactobacillales	1	0	0	0	1	1	0	0	1	0	0	0	0	0	0	1	0
SEQF1593.1	GCA_000160555.1	Selenomonas	noxia	Selenomonadales	1	1	1	0	1	1	1	1	1	0	1	0	0	0	0	0	0
SEQF1594.1	GCA_000160435.1	Kingella	oralis	Neisseriales	0	1	0	0	1	1	1	1	1	0	1	0	0	0	0	0	0
SEQF1595.2	GCA_000160075.2	Abiotrophia	defectiva	Lactobacillales	0	0	0	0	1	1	1	1	1	0	1	0	0	0	0	0	0
SEQF1596.2	GCA_000160035.2	Catonella	morbi	Lachnospirales	0	0	0	0	0	0	0	1	1	0	1	1	0	0	0	1	0
SEQF1597.1	GCA_000159995.1	Alloprevotella	tannerae	Bacteroidales	1	0	0	1	1	1	1	1	2	1	0	0	0	0	0	0	0
SEQF1598.1	GCA_000160495.1	Selenomonas	sputigena	Selenomonadales	1	1	1	0	1	1	1	1	1	0	1	0	0	0	0	0	0
SEQF1599.1	GCA_000162875.1	Slackia	exigua	Eggerthellales	1	0	0	0	1	1	0	1	1	0	1	0	0	0	0	0	0
SEQF1600.1	GCA_000176335.1	Pseudoleptotrichia	goodfellowii	Fusobacteriales	0	0	0	0	0	0	0	1	1	0	1	1	0	1	0	0	0
SEQF1601.1	GCA_000162955.1	Leptotrichia	hofstadii	Fusobacteriales	1	0	0	0	0	0	0	1	1	0	1	0	0	1	0	0	1
SEQF1602.1	GCA_000174755.1	Capnocytophaga	gingivalis	Flavobacteriales	1	0	0	1	0	0	0	1	1	0	1	0	0	0	0	0	0
SEQF1603.1	GCA_000160135.1	Oribacterium	sp._HMT_078	Lachnospirales	0	0	0	0	0	0	0	1	1	0	1	1	0	0	0	1	0
SEQF1604.1	GCA_000160655.1	Cardiobacterium	hominis	Cardiobacteriales	0	1	0	0	0	1	1	1	1	0	1	0	0	0	0	0	0
SEQF1605.1	GCA_000160675.1	Granulicatella	adiacens	Lactobacillales	0	0	0	0	0	0	0	1	1	1	0	0	0	0	0	1	0
SEQF1607.1	GCA_000160635.1	Oribacterium	sinus	Lachnospirales	0	0	0	0	0	0	0	1	2	0	1	1	0	0	0	1	0
SEQF1608.2	GCA_000162475.2	Granulicatella	elegans	Lactobacillales	0	0	0	0	1	1	1	1	1	1	0	0	0	0	0	0	0
SEQF1610.1	GCA_000175895.1	Treponema	vincentii	Spirochaetales	0	0	0	0	0	0	0	1	1	0	1	1	0	0	0	0	0
SEQF1611.1	GCA_000177335.1	Pyramidobacter	piscolens	Synergistales	0	0	0	0	0	1	1	1	1	0	1	1	0	0	0	0	0
SEQF1612.1	GCA_000161995.1	Jonquetella	anthropi	Synergistales	0	0	0	0	0	0	0	1	1	0	1	0	0	0	1	0	0
SEQF1616.1	GCA_000160695.1	Selenomonas	flueggei	Selenomonadales	1	1	1	0	1	1	1	1	1	0	1	0	0	0	0	0	0
SEQF1617.1	GCA_000163495.1	Prevotella	sp._HMT_472	Bacteroidales	1	0	0	0	1	1	1	1	2	1	0	0	0	0	0	0	0
SEQF1618.1	GCA_000469405.1	Leptotrichia	wadei	Fusobacteriales	1	0	0	0	0	0	0	1	1	0	1	0	0	1	0	0	0
SEQF1619.1	GCA_000026645.1	Pseudomonas	aeruginosa	Pseudomonadales	2	0	1	1	1	1	1	1	1	1	0	1	0	0	0	0	0
SEQF1620.1	GCA_000145595.1	Staphylococcus	aureus	Bacillales	0	1	1	0	1	1	1	1	1	1	1	1	0	0	1	0	0
SEQF1622.1	GCA_000021145.1	Acinetobacter	baumannii	Moraxellales	1	0	0	1	1	1	1	1	1	1	1	0	0	0	0	0	0
SEQF1624.1	GCA_000026545.1	Escherichia	coli	Enterobacterales	1	0	1	1	1	1	1	1	1	1	0	3	0	0	0	0	1
SEQF1638.1	GCA_000159175.1	Levilactobacillus	brevis	Lactobacillales	1	0	0	0	0	0	0	1	1	1	0	3	0	0	0	1	0
SEQF1639.1	GCA_000284495.1	Escherichia	coli	Enterobacterales	1	0	1	1	1	1	1	1	1	1	0	3	0	0	0	0	1
SEQF1640.1	GCA_000159575.1	Staphylococcus	epidermidis	Bacillales	0	1	1	0	1	1	1	1	1	1	1	1	0	0	1	0	0
SEQF1641.1	GCA_000159695.1	Finegoldia	magna	Tissierellales	1	0	0	0	0	0	0	1	1	0	1	1	0	1	0	0	3
SEQF1642.1	GCA_000026665.1	Streptococcus	pneumoniae	Lactobacillales	1	0	0	0	1	1	1	1	1	0	0	0	0	0	0	1	0
SEQF1643.1	GCA_000021165.1	Helicobacter	pylori	Campylobacterales	1	0	0	0	1	1	1	1	1	0	1	0	0	0	0	0	0
SEQF1644.1	GCA_000021465.1	Helicobacter	pylori	Campylobacterales	1	0	0	0	1	1	1	1	1	0	1	0	0	0	0	0	0
SEQF1645.1	GCA_000026685.1	Mycobacterium	leprae	Mycobacteriales	1	0	0	0	0	0	0	0	0	0	0	0	0	0	0	0	0
SEQF1646.1	GCA_000442105.1	Phocaeicola	abscessus	Bacteroidales	1	0	0	1	1	1	1	1	2	0	1	0	0	0	0	0	0
SEQF1647.1	GCA_000185285.1	Schaalia	sp._HMT_180	Actinomycetales	1	0	0	0	0	0	0	1	0	0	0	0	0	0	0	0	0
SEQF1648.1	GCA_000158635.1	Corynebacterium	matruchotii	Mycobacteriales	1	0	0	0	0	0	0	1	0	0	0	3	0	0	0	0	1
SEQF1649.2	GCA_000155915.2	Lactobacillus	jensenii	Lactobacillales	0	0	0	0	0	0	0	0	0	0	0	2	0	0	0	0	0
SEQF1652.2	GCA_000163775.2	Simonsiella	muelleri	Neisseriales	0	1	0	1	1	1	1	1	1	0	1	0	0	0	0	0	0
SEQF1653.1	GCA_000411115.1	Capnocytophaga	granulosa	Flavobacteriales	1	0	0	1	0	0	0	1	1	0	1	0	0	0	0	0	0
SEQF1654.1	GCA_000163755.1	Scardovia	inopinata	Bifidobacteriales	1	0	0	0	0	0	0	1	0	0	0	3	0	0	0	0	0
SEQF1655.1	GCA_000163835.1	Parascardovia	denticolens	Bifidobacteriales	1	0	0	0	0	0	0	1	0	0	0	3	0	0	0	0	0
SEQF1656.1	GCA_000162915.1	Prevotella	oris	Bacteroidales	1	0	0	1	1	1	1	1	2	1	0	0	0	0	0	0	0
SEQF1657.1	GCA_000163415.1	Schaalia	odontolytica	Actinomycetales	1	0	0	0	0	0	0	1	0	0	0	0	0	0	0	0	0
SEQF1658.1	GCA_000159955.1	Paenibacillus	phoenicis	Bacillales	1	0	0	0	1	1	1	1	1	1	0	0	0	0	0	0	0
SEQF1659.1	GCA_000090875.1	Neisseria	oralis	Neisseriales	0	1	0	1	1	1	1	1	1	0	1	1	0	0	0	0	0
SEQF1660.1	GCA_000162895.1	Peptidiphaga	gingivicola	Actinomycetales	1	0	0	0	0	0	0	1	0	0	0	0	0	0	0	0	0
SEQF1663.1	GCA_000162935.1	Prevotella	veroralis	Bacteroidales	1	0	0	0	1	1	1	1	2	1	0	0	0	0	0	0	0
SEQF1666.1	GCA_000186685.1	Schaalia	sp._HMT_178	Actinomycetales	1	0	0	0	0	0	0	1	0	0	0	2	0	0	0	0	0
SEQF1667.1	GCA_000364865.1	Schaalia	cardiffensis	Actinomycetales	1	0	0	0	0	0	0	1	0	0	0	1	0	0	0	0	0
SEQF1668.1	GCA_000239715.1	Actinomyces	johnsonii	Actinomycetales	1	0	0	0	0	0	0	0	0	0	0	0	0	0	0	0	0
SEQF1670.1	GCA_000233535.1	Olsenella	sp._HMT_809	Coriobacteriales	1	0	0	0	0	0	0	1	1	0	1	0	0	0	0	0	0
SEQF1671.1	GCA_000234115.1	Alloprevotella	rava	Bacteroidales	1	0	0	1	1	1	1	1	2	1	0	0	0	0	0	0	0
SEQF1672.1	GCA_000235445.1	Johnsonella	ignava	Lachnospirales	0	0	0	0	0	0	0	1	1	0	1	1	0	0	0	1	0
SEQF1673.1	GCA_000234095.1	Selenomonas	infelix	Selenomonadales	1	1	1	0	1	1	1	1	1	0	1	0	0	0	0	0	0
SEQF1674.1	GCA_000210715.1	Fretibacterium	fastidiosum	Synergistales	0	1	0	0	0	0	0	1	0	0	1	0	0	0	0	1	0
SEQF1675.1	GCA_000231255.1	Aggregatibacter	aphrophilus	Pasteurellales	1	0	0	1	1	1	1	1	1	0	1	0	0	0	0	0	0
SEQF1676.2	GCA_000214475.2	Parvimonas	sp._HMT_110	Tissierellales	0	0	0	0	0	0	0	1	1	0	1	0	0	0	0	1	0
SEQF1677.1	GCA_000193395.1	Prevotella	denticola	Bacteroidales	1	0	0	0	1	1	1	1	2	1	0	0	0	0	0	0	0
SEQF1678.1	GCA_000277715.1	Arachnia	propionica	Propionibacteriales	1	0	0	0	0	0	0	1	0	0	0	0	0	0	0	0	0
SEQF1679.1	GCA_000191825.1	Treponema	denticola	Spirochaetales	0	0	0	0	0	0	0	1	1	0	1	0	0	0	0	0	0
SEQF1680.2	GCA_000234075.2	Fusobacterium	nucleatum	Fusobacteriales	1	0	0	0	0	0	0	1	1	0	1	0	0	1	0	0	0
SEQF1681.1	GCA_000179335.1	Peptoniphilus	lacrimalis	Tissierellales	0	0	0	0	0	0	0	1	1	0	1	0	0	0	0	0	0
SEQF1683.2	GCA_000186945.2	Solobacterium	moorei	Erysipelotrichales	0	0	0	0	0	0	0	1	1	0	1	2	0	0	0	1	0
SEQF1684.2	GCA_000213295.2	Capnocytophaga	leadbetteri	Flavobacteriales	1	0	0	1	0	0	0	1	1	0	1	0	0	0	0	0	0
SEQF1685.1	GCA_000165735.1	Megasphaera	micronuciformis	Veillonellales	2	0	0	1	1	1	1	1	1	1	0	0	0	0	0	0	0
SEQF1687.1	GCA_000192225.1	Capnocytophaga	sp._HMT_338	Flavobacteriales	1	0	0	1	0	0	0	1	1	0	1	0	0	0	0	0	0
SEQF1688.1	GCA_000479025.1	Rothia	aeria	Micrococcales	1	0	0	0	0	0	0	1	0	0	0	0	0	0	0	0	0
SEQF1689.1	GCA_000336235.1	Prevotella	nigrescens	Bacteroidales	1	0	0	0	1	1	1	1	2	1	0	0	0	0	0	0	0
SEQF1690.1	GCA_000234135.1	Selenomonas	noxia	Selenomonadales	1	1	1	0	1	1	1	1	1	0	1	0	0	0	0	0	0
SEQF1691.1	GCA_000224615.1	Prevotella	oulorum	Bacteroidales	1	0	0	0	1	1	1	1	2	1	0	0	0	0	0	0	0
SEQF1692.2	GCA_000184365.2	Streptococcus	anginosus	Lactobacillales	0	0	0	0	0	0	0	1	1	0	1	0	0	0	0	1	0
SEQF1693.1	GCA_000186965.1	Actinomyces	sp._HMT_171	Actinomycetales	1	0	0	0	0	0	0	0	0	0	0	0	0	0	0	0	0
SEQF1695.1	GCA_000242675.1	Peptostreptococcaceae	[Eubacterium]_infirmum	Peptostreptococcales	0	0	0	0	0	0	0	1	1	0	1	0	0	0	0	1	0
SEQF1697.1	GCA_000187125.1	Selenomonas	artemidis	Selenomonadales	1	1	1	0	1	1	1	1	1	0	1	0	0	0	0	0	0
SEQF1698.2	GCA_000183505.2	Veillonella	rogosae	Veillonellales	1	0	0	0	1	1	1	1	1	1	0	0	0	0	0	0	0
SEQF1701.1	GCA_000220835.1	Actinomyces	sp._HMT_448	Actinomycetales	1	0	0	0	0	0	0	0	0	0	0	3	0	0	0	0	0
SEQF1702.1	GCA_000180035.1	Streptococcus	parasanguinis	Lactobacillales	1	0	0	0	0	0	0	1	1	1	0	0	0	0	0	0	0
SEQF1703.1	GCA_000234035.1	Streptococcus	intermedius	Lactobacillales	0	0	0	0	0	0	0	1	1	0	1	0	0	0	0	0	0
SEQF1704.1	GCA_000235485.1	Streptococcus	oralis	Lactobacillales	1	0	0	0	0	0	0	1	1	0	1	0	0	0	0	0	0
SEQF1705.1	GCA_000180075.1	Streptococcus	vestibularis	Lactobacillales	1	0	1	0	1	1	1	1	1	1	0	0	0	0	0	1	0
SEQF1706.1	GCA_000234015.1	Streptococcus	intermedius	Lactobacillales	0	0	0	0	0	0	0	1	1	0	1	0	0	0	0	0	0
SEQF1707.4	GCA_000146265.4	Aggregatibacter	actinomycetemcomitans	Pasteurellales	1	0	0	1	1	1	1	1	1	0	1	0	0	0	0	0	0
SEQF1708.1	GCA_000022865.1	Bacillus	anthracis	Bacillales	1	0	1	0	1	1	1	1	1	1	0	3	0	0	0	0	0
SEQF1709.1	GCA_000021445.1	Bacillus	anthracis	Bacillales	1	0	1	0	1	1	1	1	1	1	0	3	0	0	0	0	0
SEQF1710.1	GCA_000010765.1	Escherichia	coli	Enterobacterales	1	0	1	1	1	1	1	1	1	1	0	3	0	0	0	0	1
SEQF1711.1	GCA_000091005.1	Escherichia	coli	Enterobacterales	1	0	1	1	1	1	1	1	1	1	0	3	0	0	0	0	1
SEQF1712.1	GCA_000010745.1	Escherichia	coli	Enterobacterales	1	0	2	1	1	1	1	1	1	1	0	3	0	0	0	0	1
SEQF1713.1	GCA_000022345.1	Escherichia	coli	Enterobacterales	1	0	1	1	1	1	1	1	1	1	0	3	0	0	0	0	0
SEQF1714.1	GCA_000091345.1	Helicobacter	pylori	Campylobacterales	1	0	0	0	1	1	1	1	1	0	1	0	0	0	0	0	0
SEQF1715.1	GCA_000009885.1	Klebsiella	pneumoniae	Enterobacterales	1	0	1	1	1	1	1	1	1	1	0	2	0	0	0	0	0
SEQF1716.1	GCA_000091405.1	Lactobacillus	johnsonii	Lactobacillales	0	0	0	0	0	0	0	0	0	0	0	1	0	0	0	0	0
SEQF1717.1	GCA_000026505.1	Lacticaseibacillus	rhamnosus	Lactobacillales	0	0	0	0	0	0	0	1	1	1	0	0	0	0	0	0	0
SEQF1718.1	GCA_000026525.1	Lacticaseibacillus	rhamnosus	Lactobacillales	0	0	0	0	0	0	0	1	1	1	0	1	0	0	0	0	0
SEQF1719.1	GCA_000025045.1	Lactococcus	lactis	Lactobacillales	1	0	0	0	0	0	0	1	1	0	1	0	0	0	0	0	0
SEQF1720.1	GCA_000022925.1	Listeria	monocytogenes	Bacillales	1	0	0	0	0	0	0	1	1	1	0	0	0	0	0	0	0
SEQF1721.1	GCA_000026705.1	Listeria	monocytogenes	Bacillales	1	0	0	0	0	0	0	1	1	1	0	0	0	0	0	0	0
SEQF1722.1	GCA_000085865.1	Mycoplasma	hominis	Mycoplasmatales	0	0	0	0	0	0	0	0	0	0	0	0	0	0	0	0	0
SEQF1723.1	GCA_000083565.1	Neisseria	meningitidis	Neisseriales	0	1	0	1	1	1	1	1	1	0	1	0	0	0	0	0	0
SEQF1724.1	GCA_000011025.1	Rothia	mucilaginosa	Micrococcales	1	0	0	0	0	0	0	1	0	0	0	0	0	0	0	0	0
SEQF1725.1	GCA_000024585.1	Staphylococcus	aureus	Bacillales	0	1	1	0	1	1	1	1	1	1	1	1	0	0	1	0	0
SEQF1726.1	GCA_000019005.1	Streptococcus	pneumoniae	Lactobacillales	1	0	0	0	1	1	1	1	1	0	0	0	0	0	0	1	0
SEQF1728.1	GCA_000159095.1	Anaerococcus	tetradius	Tissierellales	0	0	0	0	0	0	0	1	1	0	1	0	0	0	0	1	0
SEQF1729.2	GCA_000159235.2	Fannyhessea	vaginae	Coriobacteriales	1	0	0	0	0	0	0	1	1	0	0	1	0	0	0	1	0
SEQF1730.1	GCA_000177375.1	Bulleidia	extructa	Erysipelotrichales	0	0	0	0	0	0	0	1	1	0	1	2	0	0	0	1	0
SEQF1731.1	GCA_000175655.1	Campylobacter	showae	Campylobacterales	1	0	0	0	1	1	0	1	1	0	1	0	0	0	0	0	0
SEQF1734.1	GCA_000157215.1	Enterococcus	casseliflavus	Lactobacillales	0	0	0	0	0	0	0	1	1	1	0	0	0	0	0	0	0
SEQF1736.1	GCA_000159655.1	Enterococcus	faecalis	Lactobacillales	1	0	0	0	0	0	0	1	1	1	0	2	0	0	0	1	1
SEQF1751.1	GCA_000175015.1	Enterococcus	faecalis	Lactobacillales	1	0	0	0	0	0	0	1	1	1	0	2	0	0	0	1	1
SEQF1752.1	GCA_000159275.1	Enterococcus	faecalis	Lactobacillales	1	0	0	0	0	0	0	1	1	1	0	2	0	0	0	1	1
SEQF1754.1	GCA_000159295.1	Escherichia	coli	Enterobacterales	1	0	1	1	1	1	1	1	1	1	0	3	0	0	0	0	1
SEQF1757.2	GCA_000159155.2	Gardnerella	vaginalis	Bifidobacteriales	0	0	0	0	0	0	0	1	0	0	0	3	0	0	0	0	1
SEQF1758.1	GCA_000175435.1	Haemophilus	influenzae	Pasteurellales	1	0	0	1	1	1	1	1	1	0	1	1	0	0	0	0	0
SEQF1759.1	GCA_000175455.1	Haemophilus	influenzae	Pasteurellales	1	0	0	1	1	1	3	1	1	0	1	0	0	0	0	0	0
SEQF1760.1	GCA_000163455.1	Klebsiella	pneumoniae	Enterobacterales	1	0	1	1	1	1	1	1	1	1	1	2	0	0	0	0	0
SEQF1761.1	GCA_000159715.1	Lactobacillus	acidophilus	Lactobacillales	0	0	0	0	0	0	0	0	0	0	0	1	0	0	0	0	0
SEQF1766.1	GCA_000159215.1	Limosilactobacillus	fermentum	Lactobacillales	1	0	0	0	0	0	0	0	0	0	0	3	0	0	0	0	0
SEQF1767.1	GCA_000175055.1	Lactobacillus	gasseri	Lactobacillales	0	0	0	0	0	0	0	0	0	0	0	1	0	0	0	0	0
SEQF1768.1	GCA_000177415.1	Lactobacillus	gasseri	Lactobacillales	0	0	0	0	0	0	0	0	0	0	0	1	0	0	0	0	0
SEQF1769.1	GCA_000143645.1	Lactobacillus	gasseri	Lactobacillales	0	0	0	0	0	0	0	0	0	0	0	1	0	0	0	0	0
SEQF1770.1	GCA_000160875.1	Lactobacillus	iners	Lactobacillales	1	0	0	0	0	0	0	0	0	0	0	1	0	0	0	0	0
SEQF1773.1	GCA_000175035.1	Lactobacillus	jensenii	Lactobacillales	0	0	0	0	0	0	0	0	0	0	0	2	0	0	0	0	0
SEQF1776.1	GCA_000159355.1	Lactobacillus	johnsonii	Lactobacillales	0	0	0	0	0	0	0	0	0	0	0	1	0	0	0	0	0
SEQF1777.1	GCA_000159495.1	Lacticaseibacillus	paracasei	Lactobacillales	0	0	0	0	0	0	0	1	1	1	0	0	0	0	0	0	0
SEQF1778.1	GCA_000159615.1	Limosilactobacillus	reuteri	Lactobacillales	1	0	0	0	0	0	0	1	0	0	0	3	0	0	0	0	0
SEQF1779.1	GCA_000160715.1	Limosilactobacillus	reuteri	Lactobacillales	1	0	0	0	0	0	0	1	0	0	0	3	0	0	0	0	0
SEQF1780.2	GCA_000159475.2	Limosilactobacillus	reuteri	Lactobacillales	1	0	0	0	0	0	0	1	0	0	0	3	0	0	0	0	0
SEQF1781.1	GCA_000160175.1	Lacticaseibacillus	rhamnosus	Lactobacillales	0	0	0	0	0	0	0	1	1	1	0	1	0	0	0	0	0
SEQF1782.1	GCA_000159395.1	Ligilactobacillus	salivarius	Lactobacillales	0	0	0	0	0	0	0	1	1	0	1	2	0	0	0	1	1
SEQF1783.1	GCA_000159435.1	Limosilactobacillus	vaginalis	Lactobacillales	0	0	0	0	0	0	0	1	0	0	0	1	0	0	0	0	0
SEQF1784.1	GCA_000176775.1	Mobiluncus	mulieris	Actinomycetales	1	0	0	0	0	0	0	2	0	0	0	0	0	0	0	0	0
SEQF1785.1	GCA_000160615.1	Mobiluncus	mulieris	Actinomycetales	1	0	0	0	0	0	0	2	0	0	0	0	0	0	0	0	0
SEQF1790.1	GCA_000175275.1	Neisseria	flavescens	Neisseriales	0	1	0	1	1	1	0	1	1	0	1	0	0	0	0	0	0
SEQF1794.1	GCA_000159935.1	Neisseria	gonorrhoeae	Neisseriales	0	1	0	1	1	1	1	1	1	0	1	0	0	0	0	0	0
SEQF1795.1	GCA_000176955.1	Peptoniphilus	lacrimalis	Tissierellales	0	0	0	0	0	0	0	1	1	0	1	0	0	0	0	0	0
SEQF1796.1	GCA_000174775.1	Porphyromonas	uenonis	Bacteroidales	1	0	0	1	1	1	1	1	2	1	0	0	0	0	0	0	0
SEQF1797.1	GCA_000177315.1	Prevotella	bivia	Bacteroidales	1	0	0	1	1	1	1	1	2	1	0	0	0	0	0	0	0
SEQF1798.1	GCA_000162455.1	Prevotella	buccae	Bacteroidales	1	0	0	1	1	1	1	1	2	1	0	0	0	0	0	0	0
SEQF1799.1	GCA_000177075.1	Prevotella	buccalis	Bacteroidales	1	0	0	1	1	1	1	1	2	1	0	0	0	0	0	0	0
SEQF1800.1	GCA_000163035.1	Prevotella	melaninogenica	Bacteroidales	1	0	0	0	1	1	1	1	2	1	0	0	0	0	0	0	0
SEQF1801.1	GCA_000177395.1	Cutibacterium	acnes	Propionibacteriales	1	0	0	0	0	0	0	1	0	0	0	1	0	0	0	0	0
SEQF1802.1	GCA_000160755.1	Proteus	mirabilis	Enterobacterales	1	0	1	1	1	1	1	1	1	1	0	0	0	0	0	0	0
SEQF1803.1	GCA_000175495.1	Staphylococcus	aureus	Bacillales	0	1	1	0	1	1	1	1	1	1	1	1	0	0	1	0	0
SEQF1804.1	GCA_000174455.1	Staphylococcus	aureus	Bacillales	0	1	1	0	1	1	1	1	1	1	1	1	0	0	1	0	0
SEQF1805.1	GCA_000174475.1	Staphylococcus	aureus	Bacillales	0	1	1	0	1	1	1	1	1	1	1	1	0	0	1	0	0
SEQF1806.1	GCA_000174495.1	Staphylococcus	aureus	Bacillales	0	1	1	0	1	1	1	1	1	1	1	1	0	0	1	0	0
SEQF1807.1	GCA_000174515.1	Staphylococcus	aureus	Bacillales	0	1	1	0	1	1	1	1	1	1	1	1	0	0	1	0	0
SEQF1808.1	GCA_000174535.1	Staphylococcus	aureus	Bacillales	0	1	1	0	1	1	1	1	1	1	1	1	0	0	1	0	0
SEQF1809.1	GCA_000175955.1	Staphylococcus	aureus	Bacillales	0	1	1	0	1	1	1	1	1	1	1	1	0	0	1	0	0
SEQF1810.1	GCA_000174555.1	Staphylococcus	aureus	Bacillales	0	1	1	0	1	1	1	1	1	1	1	1	0	0	1	0	0
SEQF1811.1	GCA_000174575.1	Staphylococcus	aureus	Bacillales	0	1	1	0	1	1	1	1	1	1	1	1	0	0	1	0	0
SEQF1812.1	GCA_000174595.1	Staphylococcus	aureus	Bacillales	0	1	1	0	1	1	1	1	1	1	1	1	0	0	1	0	0
SEQF1813.1	GCA_000174615.1	Staphylococcus	aureus	Bacillales	0	1	1	0	1	1	1	1	1	1	1	1	0	0	1	0	0
SEQF1814.1	GCA_000175475.1	Staphylococcus	aureus	Bacillales	0	1	1	0	1	1	1	1	1	1	1	1	0	0	1	0	0
SEQF1815.1	GCA_000174635.1	Staphylococcus	aureus	Bacillales	0	1	1	0	1	1	1	1	1	1	1	1	0	0	1	0	0
SEQF1830.1	GCA_000160195.1	Staphylococcus	aureus	Bacillales	0	1	1	0	1	1	1	1	1	1	1	1	0	0	1	0	0
SEQF1831.1	GCA_000159555.1	Staphylococcus	aureus	Bacillales	0	1	1	0	1	1	1	1	1	1	1	1	0	0	1	0	0
SEQF1832.2	GCA_000159535.2	Staphylococcus	aureus	Bacillales	0	1	1	0	1	1	1	1	1	1	1	1	0	0	1	0	0
SEQF1833.1	GCA_000149015.1	Staphylococcus	aureus	Bacillales	0	1	1	0	1	1	1	1	1	1	1	1	0	0	1	0	0
SEQF1835.1	GCA_000162735.1	Staphylococcus	aureus	Bacillales	0	1	1	0	1	1	1	1	1	1	1	1	0	0	1	0	0
SEQF1836.1	GCA_000160215.1	Staphylococcus	epidermidis	Bacillales	0	1	1	0	1	1	1	1	1	1	1	1	0	0	1	0	0
SEQF1837.1	GCA_000177115.1	Staphylococcus	epidermidis	Bacillales	0	2	1	0	1	1	1	1	1	1	1	1	0	0	1	0	0
SEQF1838.1	GCA_000160235.1	Staphylococcus	epidermidis	Bacillales	0	1	1	0	1	1	1	1	1	1	1	1	0	0	1	0	0
SEQF1839.1	GCA_000175175.1	Staphylococcus	warneri	Bacillales	0	1	1	1	1	1	1	1	1	1	1	1	0	0	1	0	0
SEQF1840.1	GCA_000196595.1	Streptococcus	pneumoniae	Lactobacillales	1	0	0	0	1	1	1	1	1	0	1	0	0	0	0	1	0
SEQF1843.1	GCA_000174715.1	Streptococcus	salivarius	Lactobacillales	1	0	1	0	1	1	1	1	1	2	0	0	0	0	0	1	0
SEQF1844.1	GCA_000182705.1	Yersinia	pestis	Enterobacterales	1	0	1	1	1	1	1	1	1	1	0	0	0	0	0	0	0
SEQF1845.3	GCA_000163615.3	Aggregatibacter	actinomycetemcomitans	Pasteurellales	1	0	0	1	1	1	1	1	1	0	1	0	0	0	0	0	0
SEQF1846.1	GCA_000180055.1	Streptococcus	downei	Lactobacillales	1	0	1	0	1	1	1	1	1	1	0	0	0	0	0	0	0
SEQF1847.2	GCA_000220065.2	Streptococcus	sp._HMT_056	Lactobacillales	1	0	0	0	0	0	0	1	1	0	1	0	0	0	0	0	0
SEQF1848.2	GCA_000223355.2	Actinomyces	sp._HMT_175	Actinomycetales	1	0	0	0	0	0	0	0	0	0	0	0	0	0	0	0	0
SEQF1849.1	GCA_000195595.1	Actinomyces	sp._HMT_170	Actinomycetales	1	0	0	0	0	0	0	0	0	0	0	0	0	0	0	0	0
SEQF1850.1	GCA_000242295.1	Haemophilus	haemolyticus	Pasteurellales	1	0	0	0	0	1	1	1	1	0	1	0	0	0	0	0	0
SEQF1851.1	GCA_000478805.1	Acidipropionibacterium	acidifaciens	Propionibacteriales	1	0	0	0	0	0	0	1	0	0	0	3	0	0	0	0	0
SEQF1852.1	GCA_000234055.1	Prevotella	histicola	Bacteroidales	1	0	0	0	1	1	1	1	2	1	0	0	0	0	0	0	0
SEQF1853.1	GCA_000275805.1	Scardovia	wiggsiae	Bifidobacteriales	0	0	0	0	0	0	0	1	0	0	0	3	0	0	0	0	0
SEQF1854.2	GCA_000214455.2	Oribacterium	asaccharolyticum	Lachnospirales	0	0	0	0	0	0	0	1	1	0	1	2	0	0	0	1	0
SEQF1855.2	GCA_000221565.2	Peptoniphilus	sp._HMT_375	Tissierellales	0	0	0	0	0	0	0	1	1	1	0	1	0	0	0	1	0
SEQF1856.2	GCA_000221505.2	Limosilactobacillus	oris	Lactobacillales	0	0	0	0	0	0	0	1	0	0	0	3	0	0	0	0	0
SEQF1857.2	GCA_000223315.2	Parvimonas	sp._HMT_393	Tissierellales	0	0	0	0	0	0	0	1	1	0	1	0	0	0	0	1	0
SEQF1858.2	GCA_000183625.2	Selenomonas	sp._HMT_137	Selenomonadales	1	1	1	0	1	1	1	1	1	0	1	0	0	0	0	0	0
SEQF1859.2	GCA_000221605.2	Veillonella	sp._HMT_780	Veillonellales	1	0	0	0	0	1	1	1	1	1	0	0	0	0	0	0	0
SEQF1860.1	GCA_000239355.1	Cardiobacterium	valvarum	Cardiobacteriales	0	1	0	0	1	1	1	0	1	0	1	0	0	0	0	0	0
SEQF1861.1	GCA_000242275.1	Lentilactobacillus	kisonensis	Lactobacillales	1	0	0	0	0	0	0	1	1	0	0	4	0	0	0	1	0
SEQF1862.1	GCA_000238835.1	Lentilactobacillus	parafarraginis	Lactobacillales	1	0	0	0	0	0	0	1	1	1	0	2	0	0	0	1	0
SEQF1863.1	GCA_000243035.1	Prevotella	micans	Bacteroidales	1	0	0	0	0	1	1	1	2	1	0	0	0	0	0	0	0
SEQF1864.1	GCA_000340685.1	Treponema	denticola	Spirochaetales	0	0	0	0	0	0	0	1	1	0	2	0	0	0	0	0	0
SEQF1865.1	GCA_000338615.1	Treponema	denticola	Spirochaetales	0	0	0	0	0	0	0	1	1	0	1	0	0	0	0	0	0
SEQF1866.1	GCA_000340705.1	Treponema	denticola	Spirochaetales	0	0	0	0	0	0	0	1	1	0	1	0	0	0	0	0	0
SEQF1867.1	GCA_000338455.1	Treponema	denticola	Spirochaetales	0	0	0	0	0	0	0	1	1	0	1	0	0	0	0	0	0
SEQF1868.1	GCA_000340605.1	Treponema	denticola	Spirochaetales	0	0	0	0	0	0	0	1	1	0	1	0	0	0	0	0	0
SEQF1869.1	GCA_000340645.1	Treponema	denticola	Spirochaetales	0	0	0	0	0	0	0	1	1	0	1	0	0	0	0	0	0
SEQF1870.1	GCA_000338515.1	Treponema	denticola	Spirochaetales	0	0	0	0	0	0	0	1	1	0	1	0	0	0	0	0	0
SEQF1871.1	GCA_000340745.1	Treponema	denticola	Spirochaetales	0	0	0	0	0	0	0	1	1	0	1	0	0	0	0	0	0
SEQF1872.1	GCA_000338635.1	Treponema	denticola	Spirochaetales	0	0	0	0	0	0	0	1	1	0	1	0	0	0	0	0	0
SEQF1873.1	GCA_000340725.1	Treponema	denticola	Spirochaetales	0	0	0	0	0	0	0	1	1	0	1	0	0	0	0	0	0
SEQF1874.1	GCA_000413115.1	Treponema	denticola	Spirochaetales	0	0	0	0	0	0	0	1	1	0	1	0	0	0	0	0	0
SEQF1875.1	GCA_000413095.1	Treponema	denticola	Spirochaetales	0	0	0	0	0	0	0	1	1	0	1	0	0	0	0	0	0
SEQF1876.1	GCA_000338475.1	Treponema	denticola	Spirochaetales	0	0	0	0	0	0	0	1	1	0	1	0	0	0	0	0	0
SEQF1877.1	GCA_000413075.1	Treponema	denticola	Spirochaetales	0	0	0	0	0	0	0	1	1	0	1	0	0	0	0	0	0
SEQF1878.1	GCA_000338595.1	Treponema	denticola	Spirochaetales	0	0	0	0	0	0	0	1	1	0	2	0	0	0	0	0	0
SEQF1879.1	GCA_000235465.1	Fusobacterium	sp._HMT_370	Fusobacteriales	1	0	0	0	0	0	0	1	1	0	1	0	0	1	0	0	0
SEQF1880.1	GCA_000239275.1	Anaeroglobus	geminatus	Veillonellales	2	0	0	0	1	1	1	1	2	1	0	0	0	0	0	1	0
SEQF1881.1	GCA_000242315.1	Lachnoanaerobaculum	orale	Lachnospirales	0	0	0	0	0	0	0	1	1	0	1	0	0	0	0	1	0
SEQF1883.1	GCA_000242975.1	Fusobacterium	nucleatum	Fusobacteriales	1	0	0	0	0	0	0	1	1	0	1	0	0	1	0	0	0
SEQF1885.1	GCA_000260695.1	Streptococcus	parasanguinis	Lactobacillales	1	0	0	0	0	0	0	1	1	1	0	0	0	0	0	0	0
SEQF1887.1	GCA_000257925.1	Prevotella	sp._HMT_306	Bacteroidales	1	0	0	0	1	1	1	1	2	1	0	0	0	0	0	0	0
SEQF1888.2	GCA_000314775.2	Streptococcus	oralis	Lactobacillales	1	0	1	0	1	1	1	1	1	0	1	0	0	0	0	0	0
SEQF1889.2	GCA_000314795.2	Streptococcus	sp._HMT_066	Lactobacillales	1	0	0	0	0	0	0	1	1	1	0	0	0	0	0	0	0
SEQF1890.1	GCA_000315545.1	Selenomonas	sp._HMT_133	Selenomonadales	1	1	1	0	1	1	1	1	1	0	1	0	0	0	0	0	0
SEQF1892.1	GCA_000318405.1	Brevundimonas	diminuta	Caulobacterales	2	0	0	1	1	1	0	1	1	1	0	1	0	0	0	0	0
SEQF1893.1	GCA_000220235.1	Prevotella	nigrescens	Bacteroidales	1	0	0	0	1	1	1	1	2	1	0	0	0	0	0	0	0
SEQF1894.1	GCA_000318155.1	Aggregatibacter	actinomycetemcomitans	Pasteurellales	1	0	0	1	1	1	1	1	1	0	1	0	0	0	0	0	0
SEQF1895.1	GCA_000318115.1	Peptostreptococcus	anaerobius	Peptostreptococcales	1	0	0	0	0	0	0	2	1	0	1	0	0	0	0	1	0
SEQF1897.1	GCA_000318135.1	Corynebacterium	durum	Mycobacteriales	1	0	0	0	0	0	0	1	0	0	0	1	0	0	0	0	0
SEQF1899.2	GCA_000318095.2	Alloprevotella	sp._HMT_473	Bacteroidales	1	0	0	0	1	1	1	1	2	1	0	0	0	0	0	0	0
SEQF1900.1	GCA_000318295.1	Capnocytophaga	endodontalis	Flavobacteriales	1	0	0	1	0	0	0	1	1	0	1	0	0	0	0	0	0
SEQF1901.1	GCA_000258205.1	Rothia	aeria	Micrococcales	1	0	0	0	0	0	0	1	0	0	0	0	0	0	0	0	0
SEQF1902.1	GCA_000277685.1	Schaalia	georgiae	Actinomycetales	1	0	0	0	0	0	0	1	0	0	0	1	0	0	0	0	0
SEQF1903.1	GCA_000296275.1	Actinomyces	massiliensis	Actinomycetales	1	0	0	0	0	0	0	0	0	0	0	2	0	0	0	0	0
SEQF1906.1	GCA_000277665.1	Capnocytophaga	sp._HMT_335	Flavobacteriales	1	0	0	1	0	0	0	1	1	0	1	0	0	0	0	0	0
SEQF1907.1	GCA_000292995.1	Porphyromonas	pasteri	Bacteroidales	1	0	0	1	1	1	1	1	2	1	0	0	0	0	0	0	0
SEQF1909.1	GCA_000271925.1	Capnocytophaga	sp._HMT_412	Flavobacteriales	1	0	0	1	0	0	0	1	1	0	1	0	0	0	0	0	0
SEQF1910.1	GCA_000180015.1	Limosilactobacillus	oris	Lactobacillales	0	0	0	0	0	0	0	1	0	0	0	3	0	0	0	0	0
SEQF1911.2	GCA_000149165.2	Bifidobacterium	dentium	Bifidobacteriales	1	0	0	0	0	0	0	1	0	0	0	1	0	0	0	0	0
SEQF1912.1	GCA_000146855.1	Peptostreptococcaceae	[Eubacterium]_yurii	Peptostreptococcales	0	0	0	0	0	0	0	1	1	1	0	0	0	1	1	0	0
SEQF1913.1	GCA_000146755.1	Streptococcus	oralis	Lactobacillales	1	0	1	0	1	1	1	1	1	0	1	0	0	0	0	0	0
SEQF1914.1	GCA_000146365.1	Selenomonas	sp._HMT_149	Selenomonadales	1	1	1	0	1	1	1	1	1	0	1	0	0	0	0	0	0
SEQF1915.1	GCA_000146675.1	Prevotella	marshii	Bacteroidales	1	0	0	0	0	1	1	1	2	1	0	0	0	0	0	0	0
SEQF1916.1	GCA_000146655.1	Neisseria	meningitidis	Neisseriales	0	1	0	1	1	1	1	1	1	0	1	0	0	0	0	0	0
SEQF1917.2	GCA_000148565.2	Streptococcus	oralis	Lactobacillales	0	0	1	0	1	1	1	1	1	0	1	0	0	0	0	0	0
SEQF1918.1	GCA_000179755.1	Veillonella	atypica	Veillonellales	2	0	1	0	1	1	1	1	1	1	0	0	0	0	0	0	0
SEQF1919.2	GCA_000164675.2	Streptococcus	parasanguinis	Lactobacillales	1	0	0	0	0	0	0	1	1	1	0	0	0	0	0	0	0
SEQF1920.1	GCA_000178135.1	Lysinibacillus	fusiformis	Bacillales	1	0	1	0	1	1	1	1	1	1	0	1	0	0	0	0	0
SEQF1921.1	GCA_000178095.1	Peptostreptococcus	anaerobius	Peptostreptococcales	1	0	0	0	0	0	0	1	1	0	1	0	0	0	0	1	0
SEQF1922.1	GCA_000161935.1	Limosilactobacillus	coleohominis	Lactobacillales	1	0	0	0	0	0	0	1	0	0	0	2	0	0	0	0	0
SEQF1924.1	GCA_000154985.1	Streptococcus	infantis	Lactobacillales	1	0	0	0	1	1	0	1	1	0	1	1	0	0	0	0	1
SEQF1925.2	GCA_000164695.2	Rothia	dentocariosa	Micrococcales	1	0	0	0	0	0	0	1	0	0	0	0	0	0	0	0	0
SEQF1926.1	GCA_000165835.1	Achromobacter	xylosoxidans	Burkholderiales	1	1	0	1	1	1	1	1	1	0	1	0	0	0	0	0	0
SEQF1927.2	GCA_000152245.2	Eubacterium	limosum	Eubacteriales	1	0	0	0	0	0	0	1	1	1	0	1	0	1	0	0	1
SEQF1928.1	GCA_000148625.1	Mycoplasmopsis	fermentans	Metamycoplasmataceae	0	0	0	0	0	0	0	0	0	0	0	0	0	0	0	0	0
SEQF1929.1	GCA_000146975.1	Streptococcus	pneumoniae	Lactobacillales	1	0	0	0	1	1	1	1	1	0	1	0	0	0	0	1	0
SEQF1930.1	GCA_000091765.1	Lactobacillus	crispatus	Lactobacillales	0	0	0	0	0	0	0	0	0	0	0	1	0	0	0	0	0
SEQF1932.1	GCA_000477535.1	Prevotella	salivae	Bacteroidales	1	0	0	1	1	1	1	1	2	1	0	0	0	0	0	0	0
SEQF1933.1	GCA_000468755.1	Olsenella	profusa	Coriobacteriales	1	0	0	0	0	0	0	1	1	0	1	0	0	0	0	0	0
SEQF1934.1	GCA_000468635.1	Prevotella	baroniae	Bacteroidales	1	0	0	0	1	1	1	1	2	1	0	0	0	0	0	0	0
SEQF1935.1	GCA_000468135.1	Prevotella	pleuritidis	Bacteroidales	1	0	0	0	0	1	1	1	2	1	0	0	0	0	0	0	0
SEQF1936.2	GCA_000318215.2	Porphyromonas	catoniae	Bacteroidales	1	0	0	1	1	1	1	1	2	1	0	0	0	0	0	0	0
SEQF1937.2	GCA_000318275.2	Capnocytophaga	sp._HMT_332	Flavobacteriales	1	0	0	1	0	0	0	1	1	0	1	0	0	0	0	0	0
SEQF1938.2	GCA_000318315.2	Capnocytophaga	sp._HMT_324	Flavobacteriales	1	0	0	1	0	0	0	1	1	0	1	0	0	0	0	0	0
SEQF1939.2	GCA_000318355.2	Veillonella	atypica	Veillonellales	2	0	1	0	1	1	1	1	1	1	0	0	0	0	0	0	0
SEQF1940.1	GCA_000413035.1	Treponema	medium	Spirochaetales	0	0	0	0	0	0	0	1	1	0	1	1	0	0	0	0	0
SEQF1941.1	GCA_000413055.1	Treponema	maltophilum	Spirochaetales	0	0	0	0	0	0	0	1	1	0	1	1	0	0	0	0	0
SEQF1942.1	GCA_000413015.1	Treponema	socranskii	Spirochaetales	0	1	1	0	0	0	0	1	1	0	1	1	0	0	0	0	0
SEQF1944.2	GCA_000318235.2	Neisseria	sp._HMT_020	Neisseriales	0	1	0	0	1	1	1	1	1	0	1	0	0	0	0	0	0
SEQF1946.2	GCA_000318195.2	Prevotella	saccharolytica	Bacteroidales	1	0	0	0	1	1	1	1	2	1	0	0	0	0	1	0	0
SEQF1947.1	GCA_000412995.1	Treponema	vincentii	Spirochaetales	0	0	0	0	0	0	0	1	1	0	1	0	0	0	0	0	0
SEQF1948.2	GCA_000318335.2	Schaalia	lingnae	Actinomycetales	1	0	0	0	0	0	0	1	0	0	0	0	0	0	0	0	0
SEQF1949.1	GCA_000411555.1	Lancefieldella	sp._HMT_199	Coriobacteriales	1	0	0	0	0	0	0	1	1	0	1	0	0	0	0	1	0
SEQF1950.2	GCA_000318255.2	Capnocytophaga	sp._HMT_380	Flavobacteriales	1	0	0	1	0	0	0	1	1	0	1	0	0	0	0	0	0
SEQF1951.2	GCA_000318175.2	Selenomonas	sp._HMT_138	Selenomonadales	1	1	1	0	1	1	1	1	1	0	1	0	1	0	0	0	0
SEQF1952.1	GCA_000003135.1	Bifidobacterium	longum	Bifidobacteriales	1	0	0	0	0	0	0	1	0	0	0	2	0	0	0	0	1
SEQF1953.2	GCA_000241025.2	Aggregatibacter	actinomycetemcomitans	Pasteurellales	1	0	0	1	1	0	0	1	1	0	1	0	0	0	0	0	0
SEQF1954.3	GCA_000241005.3	Aggregatibacter	actinomycetemcomitans	Pasteurellales	1	0	0	1	1	1	1	1	1	0	1	0	0	0	0	0	0
SEQF1955.3	GCA_000240985.3	Aggregatibacter	actinomycetemcomitans	Pasteurellales	1	0	0	1	1	1	1	1	1	0	1	0	0	0	0	0	0
SEQF1956.3	GCA_000226495.3	Aggregatibacter	aphrophilus	Pasteurellales	1	0	0	1	1	1	1	1	1	0	1	0	0	0	0	0	0
SEQF1957.1	GCA_000185305.1	Aggregatibacter	segnis	Pasteurellales	1	0	0	0	0	1	1	1	1	0	1	0	0	0	0	0	0
SEQF1958.1	GCA_000213975.1	Centipeda	periodontii	Selenomonadales	1	1	1	0	1	1	1	1	1	0	1	0	0	0	0	0	0
SEQF1959.1	GCA_000194985.1	Dialister	micraerophilus	Veillonellales	1	0	1	1	1	1	0	1	1	0	0	0	0	0	0	0	0
SEQF1960.1	GCA_000213995.1	Enterobacter	hormaechei	Enterobacterales	1	0	1	1	1	1	1	1	1	1	0	1	0	0	0	0	0
SEQF1961.1	GCA_000191365.1	Enterococcus	casseliflavus	Lactobacillales	0	0	0	0	0	0	0	1	1	1	0	1	0	0	0	0	0
SEQF1963.1	GCA_000195005.1	Haemophilus	aegyptius	Pasteurellales	1	0	0	1	1	1	1	1	1	0	1	0	0	0	0	0	0
SEQF1964.1	GCA_000210515.1	Limosilactobacillus	fermentum	Lactobacillales	0	0	0	0	0	0	0	0	0	0	0	3	0	0	0	0	0
SEQF1965.3	GCA_000203855.3	Lactiplantibacillus	plantarum	Lactobacillales	1	0	0	0	0	0	0	1	1	0	0	4	0	0	0	0	1
SEQF1966.1	GCA_000143435.1	Ligilactobacillus	salivarius	Lactobacillales	0	0	0	0	0	0	0	1	1	0	1	2	0	0	0	1	1
SEQF1967.1	GCA_000186425.1	Lautropia	mirabilis	Burkholderiales	1	0	0	1	1	1	1	1	1	0	1	0	0	0	0	0	0
SEQF1968.2	GCA_000192945.2	Moraxella	catarrhalis	Moraxellales	1	0	0	0	1	0	1	1	1	0	0	0	0	0	0	0	0
SEQF1969.1	GCA_000194925.1	Neisseria	bacilliformis	Neisseriales	0	1	0	1	1	1	1	1	1	0	1	0	0	0	0	0	0
SEQF1970.1	GCA_000411575.1	Capnocytophaga	sp._HMT_336	Flavobacteriales	1	0	0	1	0	0	0	1	1	0	1	0	0	0	0	0	0
SEQF1971.1	GCA_000411455.1	Microbacterium	flavescens	Micrococcales	1	0	0	0	0	0	0	0	0	0	0	0	0	0	0	0	0
SEQF1972.1	GCA_000413315.1	Propionibacteriaceae	bacterium_HMT_192	Propionibacteriales	1	0	0	0	0	0	0	1	0	0	0	0	0	0	0	0	0
SEQF1974.1	GCA_000227315.1	Peptoniphilus	indolicus	Tissierellales	1	0	0	1	1	1	1	1	1	0	1	0	0	0	0	0	0
SEQF1975.1	GCA_000270225.1	Porphyromonas	gingivalis	Bacteroidales	1	0	0	1	1	1	1	1	2	1	0	0	0	0	0	0	0
SEQF1976.1	GCA_000069945.1	Corynebacterium	urealyticum	Mycobacteriales	1	0	0	0	0	0	0	1	0	0	0	2	0	0	0	0	1
SEQF1977.1	GCA_000023425.1	Ralstonia	pickettii	Burkholderiales	0	1	0	1	1	1	1	1	1	1	0	0	0	0	0	0	0
SEQF1978.1	GCA_000023925.1	Kytococcus	sedentarius	Micrococcales	1	0	0	0	0	0	0	0	0	0	0	0	0	0	0	0	0
SEQF1979.1	GCA_000024925.1	Sanguibacter	keddieii	Micrococcales	1	0	0	0	0	0	0	0	0	0	0	0	0	0	0	0	0
SEQF1980.1	GCA_000021865.1	Rhodobacter	capsulatus	Rhodobacterales	0	1	0	0	0	0	0	1	1	1	0	1	0	0	0	0	0
SEQF1981.1	GCA_000168855.1	Comamonas	testosteroni	Burkholderiales	1	0	1	1	1	1	1	1	1	1	1	0	0	0	0	0	0
SEQF1982.1	GCA_000156575.1	Anaerococcus	lactolyticus	Tissierellales	0	0	0	0	0	0	0	1	1	0	1	1	0	0	0	1	0
SEQF1983.2	GCA_000158835.2	Fusobacterium	gonidiaformans	Fusobacteriales	2	0	0	0	1	1	1	1	1	0	1	0	0	0	1	0	0
SEQF1984.1	GCA_000143745.1	Lactiplantibacillus	plantarum	Lactobacillales	1	0	0	0	0	0	0	1	1	0	0	3	0	0	0	0	1
SEQF1985.1	GCA_000184945.1	Prevotella	buccae	Bacteroidales	1	0	0	1	1	1	1	1	2	1	0	0	0	0	0	0	0
SEQF1986.1	GCA_000191065.1	Prevotella	multiformis	Bacteroidales	1	0	0	0	1	1	1	1	2	1	0	0	0	0	0	0	0
SEQF1987.1	GCA_000218235.1	Prevotella	multisaccharivorax	Bacteroidales	1	0	0	1	1	1	1	1	2	1	0	0	0	0	0	0	0
SEQF1988.2	GCA_000185145.2	Prevotella	oralis	Bacteroidales	1	0	0	0	1	1	1	1	2	1	0	0	0	0	0	0	0
SEQF1989.1	GCA_000220255.1	Prevotella	pallens	Bacteroidales	1	0	0	0	1	1	1	1	2	1	0	0	0	0	0	0	0
SEQF1990.1	GCA_000227295.1	Cutibacterium	avidum	Propionibacteriales	1	0	0	0	0	0	0	1	0	0	0	1	0	0	0	0	0
SEQF1991.5	GCA_000215775.5	Pseudomonas	aeruginosa	Pseudomonadales	2	0	1	0	1	1	1	1	1	1	0	1	0	0	0	0	0
SEQF1992.5	GCA_000215795.5	Pseudomonas	aeruginosa	Pseudomonadales	2	0	1	1	1	1	1	1	1	1	0	1	0	0	0	0	0
SEQF1993.1	GCA_000185505.1	Pseudoramibacter	alactolyticus	Eubacteriales	0	0	0	0	0	0	0	1	1	1	0	0	0	0	0	1	0
SEQF1994.1	GCA_000143585.1	Rothia	dentocariosa	Micrococcales	1	0	0	0	0	0	0	1	0	0	0	0	0	0	0	0	0
SEQF1995.1	GCA_000186445.1	Streptococcus	agalactiae	Lactobacillales	1	0	0	0	0	0	0	1	1	1	1	1	0	0	0	0	1
SEQF1996.2	GCA_000214555.2	Streptococcus	anginosus	Lactobacillales	0	0	0	0	0	0	0	1	1	0	1	0	0	0	0	0	0
SEQF1997.1	GCA_000187855.1	Streptococcus	cristatus	Lactobacillales	1	0	0	0	0	0	0	1	1	1	0	1	0	0	0	1	1
SEQF1998.1	GCA_000146585.1	Streptococcus	oralis	Lactobacillales	1	0	0	0	0	0	0	1	1	0	1	0	0	0	0	0	0
SEQF1999.2	GCA_000222705.2	Streptococcus	oralis	Lactobacillales	1	0	1	0	1	1	1	1	1	0	1	0	0	0	0	0	0
SEQF2000.1	GCA_000187585.1	Streptococcus	peroris	Lactobacillales	1	0	1	0	1	1	1	1	1	0	1	0	0	0	0	0	0
SEQF2001.2	GCA_000148505.2	Streptococcus	mitis	Lactobacillales	0	0	1	0	1	1	1	1	1	0	1	0	0	0	0	1	0
SEQF2002.2	GCA_000148525.2	Streptococcus	mitis	Lactobacillales	0	0	1	0	1	1	1	1	1	0	1	0	0	0	0	1	0
SEQF2003.2	GCA_000148545.2	Streptococcus	mitis	Lactobacillales	0	0	1	0	1	1	1	1	1	0	1	0	0	0	0	1	0
SEQF2004.1	GCA_000188295.1	Streptococcus	vestibularis	Lactobacillales	1	0	1	0	1	1	1	1	1	1	0	0	0	0	0	1	0
SEQF2005.1	GCA_000253155.1	Streptococcus	oralis	Lactobacillales	1	0	1	0	1	1	1	1	1	0	1	0	0	0	0	1	0
SEQF2006.2	GCA_000305335.2	Streptococcus	salivarius	Lactobacillales	1	0	1	0	1	1	1	1	1	1	0	0	0	0	0	1	0
SEQF2007.2	GCA_000222725.2	Streptococcus	parasanguinis	Lactobacillales	1	0	0	0	0	0	0	1	1	1	0	0	0	0	0	0	0
SEQF2008.1	GCA_000220315.1	Streptococcus	sanguinis	Lactobacillales	1	0	0	0	0	0	0	1	1	1	0	1	0	0	0	1	1
SEQF2009.1	GCA_000185265.1	Streptococcus	sanguinis	Lactobacillales	1	0	1	0	1	1	1	1	1	0	1	0	0	0	0	0	0
SEQF2010.1	GCA_000192205.1	Streptococcus	sanguinis	Lactobacillales	1	0	0	0	0	0	0	1	1	1	0	0	0	0	0	1	0
SEQF2011.1	GCA_000192245.1	Streptococcus	sanguinis	Lactobacillales	1	0	0	0	0	0	0	1	1	1	0	1	0	0	0	1	1
SEQF2012.1	GCA_000192275.1	Streptococcus	sanguinis	Lactobacillales	1	0	0	0	0	0	0	1	1	1	0	1	0	0	0	1	1
SEQF2013.1	GCA_000195025.1	Streptococcus	sanguinis	Lactobacillales	1	0	0	0	0	0	0	1	1	1	0	0	0	0	0	1	0
SEQF2014.1	GCA_000220275.1	Streptococcus	sanguinis	Lactobacillales	1	0	0	0	0	0	0	1	1	1	0	1	0	0	0	1	1
SEQF2015.1	GCA_000191085.1	Streptococcus	sanguinis	Lactobacillales	1	0	0	0	0	0	0	1	1	1	0	0	0	0	0	1	0
SEQF2016.1	GCA_000212855.1	Streptococcus	sanguinis	Lactobacillales	1	0	0	0	0	0	0	1	1	1	0	0	0	0	0	1	0
SEQF2017.1	GCA_000212815.1	Streptococcus	sanguinis	Lactobacillales	1	0	0	0	0	0	0	1	1	1	0	1	0	0	0	1	1
SEQF2018.1	GCA_000192185.1	Streptococcus	sanguinis	Lactobacillales	1	0	0	0	0	0	0	1	1	1	0	0	0	0	0	1	0
SEQF2019.1	GCA_000185365.1	Enterococcus	italicus	Lactobacillales	0	0	0	0	0	0	0	1	1	1	1	0	0	0	0	0	0
SEQF2020.1	GCA_000186465.1	Streptococcus	australis	Lactobacillales	1	0	0	0	0	0	0	1	1	1	0	0	0	0	0	0	0
SEQF2021.1	GCA_000191785.1	Parascardovia	denticolens	Bifidobacteriales	1	0	0	0	0	0	0	1	0	0	0	3	0	0	0	0	0
SEQF2022.1	GCA_000220215.1	Prevotella	dentalis	Bacteroidales	1	0	0	0	1	1	1	1	2	1	0	0	0	0	0	0	0
SEQF2023.1	GCA_000164095.1	Streptococcus	oralis	Lactobacillales	1	0	1	0	1	1	1	1	1	0	1	0	0	0	0	0	0
SEQF2029.1	GCA_000219745.1	Achromobacter	xylosoxidans	Burkholderiales	1	1	0	1	1	1	1	1	1	0	1	0	0	0	0	0	0
SEQF2030.1	GCA_000186185.1	Achromobacter	xylosoxidans	Burkholderiales	1	1	0	1	1	1	1	1	1	0	1	0	0	0	0	0	0
SEQF2031.1	GCA_000239695.1	Actinomyces	graevenitzii	Actinomycetales	1	0	0	0	0	0	0	0	0	0	0	1	0	0	0	0	0
SEQF2032.3	GCA_000226715.3	Aggregatibacter	actinomycetemcomitans	Pasteurellales	1	0	0	1	1	1	1	1	1	0	1	0	0	0	0	0	0
SEQF2033.3	GCA_000226835.3	Aggregatibacter	actinomycetemcomitans	Pasteurellales	1	0	0	1	1	1	1	1	0	0	1	0	0	0	0	0	0
SEQF2034.3	GCA_000226815.3	Aggregatibacter	actinomycetemcomitans	Pasteurellales	1	0	0	1	1	1	1	1	1	0	1	0	0	0	0	0	0
SEQF2035.2	GCA_000219665.2	Agrobacterium	tumefaciens	Hyphomicrobiales	1	0	1	0	1	1	0	1	1	1	0	5	0	0	0	0	0
SEQF2036.2	GCA_000191725.2	Anaerococcus	prevotii	Tissierellales	0	0	0	0	0	0	0	1	1	0	1	0	0	0	0	1	0
SEQF2037.1	GCA_000179715.1	Fannyhessea	vaginae	Coriobacteriales	1	0	0	0	0	0	0	1	1	0	0	1	0	0	0	0	0
SEQF2039.2	GCA_000209795.2	Bacillus	subtilis	Bacillales	1	1	1	0	1	1	1	1	1	1	0	0	0	0	0	0	0
SEQF2040.1	GCA_000007525.1	Bifidobacterium	longum	Bifidobacteriales	1	0	0	0	0	0	0	1	0	0	0	3	0	0	0	0	0
SEQF2041.1	GCA_000196575.1	Bifidobacterium	longum	Bifidobacteriales	1	0	0	0	0	0	0	1	0	0	0	3	0	0	0	0	1
SEQF2042.1	GCA_000166315.1	Bifidobacterium	longum	Bifidobacteriales	1	0	0	0	0	0	0	1	0	0	0	3	0	0	0	0	1
SEQF2043.1	GCA_000210755.1	Bifidobacterium	longum	Bifidobacteriales	1	0	0	0	0	0	0	1	0	0	0	2	0	0	0	0	1
SEQF2044.1	GCA_000196555.1	Bifidobacterium	longum	Bifidobacteriales	1	0	0	0	0	0	0	1	0	0	0	3	0	0	0	0	0
SEQF2045.1	GCA_000092325.1	Bifidobacterium	longum	Bifidobacteriales	1	0	0	0	0	0	0	1	0	0	0	1	0	0	0	0	0
SEQF2046.1	GCA_000219455.1	Bifidobacterium	longum	Bifidobacteriales	1	0	0	0	0	0	0	1	0	0	0	3	0	0	0	0	0
SEQF2047.2	GCA_000093145.2	Comamonas	testosteroni	Burkholderiales	1	0	1	1	1	1	1	1	1	1	0	0	0	0	0	0	0
SEQF2048.1	GCA_000241895.1	Corynebacterium	diphtheriae	Mycobacteriales	1	0	0	0	0	0	0	1	0	0	0	3	0	0	0	0	1
SEQF2049.1	GCA_000213955.1	Gardnerella	vaginalis	Bifidobacteriales	0	0	0	0	0	0	0	1	0	0	0	4	0	0	0	0	1
SEQF2050.1	GCA_000197875.1	Haemophilus	influenzae	Pasteurellales	1	0	0	1	1	1	1	1	1	0	1	0	0	0	0	0	0
SEQF2051.1	GCA_000200475.1	Haemophilus	influenzae	Pasteurellales	1	0	0	1	1	1	1	1	1	0	1	0	0	0	0	0	0
SEQF2052.1	GCA_000027305.1	Haemophilus	influenzae	Pasteurellales	1	0	0	1	1	1	2	1	1	0	1	0	0	0	0	0	0
SEQF2053.1	GCA_000146775.1	Bifidobacterium	dentium	Bifidobacteriales	1	0	0	0	0	0	0	1	0	0	0	1	0	0	0	0	0
SEQF2056.1	GCA_000204035.1	Brevundimonas	diminuta	Caulobacterales	2	0	0	1	1	1	0	1	1	1	0	0	0	0	0	0	0
SEQF2057.2	GCA_000241525.2	Comamonas	testosteroni	Burkholderiales	1	0	1	2	2	1	1	1	1	1	0	0	0	0	0	0	0
SEQF2058.1	GCA_000178915.1	Comamonas	testosteroni	Burkholderiales	1	0	1	1	1	1	1	1	1	1	0	0	0	0	0	0	0
SEQF2059.1	GCA_000245815.1	Dolosigranulum	pigrum	Lactobacillales	1	0	0	0	0	0	0	0	0	0	0	1	0	0	0	0	0
SEQF2060.1	GCA_000234175.1	Enterococcus	saccharolyticus	Lactobacillales	0	0	0	0	0	0	0	1	1	1	0	1	0	0	0	0	0
SEQF2061.1	GCA_000179495.1	Finegoldia	magna	Tissierellales	1	0	0	0	0	0	0	1	1	0	1	1	0	1	0	0	2
SEQF2062.1	GCA_000179695.1	Finegoldia	magna	Tissierellales	1	0	0	0	0	0	0	1	1	0	1	1	0	1	0	0	2
SEQF2063.2	GCA_000221585.2	Finegoldia	magna	Tissierellales	1	0	0	0	0	0	0	1	1	0	1	1	0	1	0	0	2
SEQF2064.1	GCA_000242215.1	Fusobacterium	necrophorum	Fusobacteriales	2	0	0	0	1	1	1	2	1	0	1	0	0	0	1	0	0
SEQF2065.1	GCA_000220825.1	Fusobacterium	nucleatum	Fusobacteriales	1	0	0	0	0	0	0	1	1	0	1	0	0	1	0	0	0
SEQF2067.1	GCA_000178895.1	Fusobacterium	nucleatum	Fusobacteriales	1	0	0	0	0	0	0	1	1	0	1	0	0	1	0	0	0
SEQF2068.1	GCA_000176475.1	Gardnerella	vaginalis	Bifidobacteriales	0	0	0	0	0	0	0	1	0	0	0	1	0	0	0	0	0
SEQF2070.1	GCA_000204355.1	Gemella	haemolysans	Bacillales	1	0	0	0	0	0	0	1	1	0	1	0	0	0	0	1	0
SEQF2071.2	GCA_000204335.2	Gemella	sanguinis	Bacillales	1	0	0	0	0	0	0	1	1	0	1	0	0	0	0	1	0
SEQF2072.2	GCA_000222005.2	Haemophilus	haemolyticus	Pasteurellales	2	0	0	0	0	1	1	1	1	0	1	0	0	0	0	0	0
SEQF2073.2	GCA_000222025.2	Haemophilus	haemolyticus	Pasteurellales	1	0	0	0	0	1	1	1	1	0	1	1	0	0	0	0	0
SEQF2074.2	GCA_000222045.2	Haemophilus	haemolyticus	Pasteurellales	1	0	0	0	0	1	1	1	1	0	1	0	0	0	0	0	0
SEQF2075.2	GCA_000222065.2	Haemophilus	haemolyticus	Pasteurellales	1	0	0	0	0	1	1	1	1	0	1	0	0	0	0	0	0
SEQF2076.2	GCA_000222085.2	Haemophilus	haemolyticus	Pasteurellales	1	0	0	0	0	1	1	1	1	0	1	0	0	0	0	0	0
SEQF2077.1	GCA_000191405.1	Haemophilus	parainfluenzae	Pasteurellales	1	0	0	0	1	1	1	1	1	0	1	0	0	0	0	0	0
SEQF2078.1	GCA_000237805.1	Jonquetella	anthropi	Synergistales	0	0	0	0	0	0	0	1	1	0	1	0	0	0	1	0	0
SEQF2079.1	GCA_000190695.1	Kingella	denitrificans	Neisseriales	0	1	0	0	1	1	1	1	1	0	1	0	0	0	0	0	0
SEQF2080.1	GCA_000213535.1	Kingella	kingae	Neisseriales	0	1	0	1	1	1	1	1	1	0	1	0	0	0	0	0	0
SEQF2084.1	GCA_000177575.1	Lactobacillus	crispatus	Lactobacillales	0	0	0	0	0	0	0	0	0	0	0	2	0	0	0	0	0
SEQF2090.1	GCA_000185405.1	Lactobacillus	iners	Lactobacillales	1	0	0	0	0	0	0	0	0	0	0	1	0	0	0	0	0
SEQF2091.2	GCA_000149125.2	Lactobacillus	iners	Lactobacillales	1	0	0	0	0	0	0	0	0	0	0	1	0	0	0	0	0
SEQF2092.2	GCA_000149105.2	Lactobacillus	iners	Lactobacillales	1	0	0	0	0	0	0	0	0	0	0	0	0	0	0	0	0
SEQF2093.2	GCA_000149085.2	Lactobacillus	iners	Lactobacillales	1	0	0	0	0	0	0	0	0	0	0	1	0	0	0	0	0
SEQF2094.2	GCA_000149065.2	Lactobacillus	iners	Lactobacillales	1	0	0	0	0	0	0	0	0	0	0	1	0	0	0	0	0
SEQF2095.1	GCA_000179955.1	Lactobacillus	iners	Lactobacillales	1	0	0	0	0	0	0	0	0	0	0	1	0	0	0	0	0
SEQF2096.1	GCA_000179935.1	Lactobacillus	iners	Lactobacillales	1	0	0	0	0	0	0	0	0	0	0	1	0	0	0	0	0
SEQF2097.1	GCA_000179975.1	Lactobacillus	iners	Lactobacillales	1	0	0	0	0	0	0	0	0	0	0	1	0	0	0	0	0
SEQF2098.1	GCA_000179995.1	Lactobacillus	iners	Lactobacillales	1	0	0	0	0	0	0	0	0	0	0	1	0	0	0	0	0
SEQF2099.2	GCA_000204435.2	Lactobacillus	iners	Lactobacillales	1	0	0	0	0	0	0	0	0	0	0	1	0	0	0	0	0
SEQF2100.2	GCA_000149145.2	Lactobacillus	iners	Lactobacillales	1	0	0	0	0	0	0	0	0	0	0	1	0	0	0	0	0
SEQF2101.2	GCA_000191685.2	Lactobacillus	iners	Lactobacillales	1	0	0	0	0	0	0	0	0	0	0	1	0	0	0	0	0
SEQF2102.2	GCA_000191705.2	Lactobacillus	iners	Lactobacillales	1	0	0	0	0	0	0	0	0	0	0	1	0	0	0	0	0
SEQF2103.3	GCA_000219475.3	Lactobacillus	johnsonii	Lactobacillales	0	0	0	0	0	0	0	0	0	0	0	0	0	0	0	0	0
SEQF2104.2	GCA_000247735.2	Lactiplantibacillus	plantarum	Lactobacillales	1	0	0	0	0	0	0	1	1	0	0	3	0	0	0	0	1
SEQF2106.1	GCA_000220485.1	Klebsiella	pneumoniae	Enterobacterales	1	0	1	1	1	1	1	1	1	1	0	2	0	0	0	0	0
SEQF2107.2	GCA_000240185.2	Klebsiella	pneumoniae	Enterobacterales	1	0	1	1	1	1	1	1	1	1	0	2	0	0	0	0	0
SEQF2108.1	GCA_000191545.1	Lactobacillus	acidophilus	Lactobacillales	0	0	0	0	0	0	0	0	0	0	0	1	0	0	0	0	0
SEQF2109.1	GCA_000194765.1	Lacticaseibacillus	casei	Lactobacillales	0	0	0	0	0	0	0	1	1	1	0	1	0	0	0	1	0
SEQF2110.1	GCA_000194785.1	Lacticaseibacillus	casei	Lactobacillales	0	0	0	0	0	0	0	1	1	1	0	1	0	0	0	1	0
SEQF2111.1	GCA_000204985.1	Lactobacillus	johnsonii	Lactobacillales	0	0	0	0	0	0	0	0	0	0	0	1	0	0	0	0	0
SEQF2112.1	GCA_000023085.1	Lactiplantibacillus	plantarum	Lactobacillales	1	0	0	0	0	0	0	1	1	0	0	3	0	0	0	0	1
SEQF2113.2	GCA_000148815.2	Lactiplantibacillus	plantarum	Lactobacillales	1	0	0	0	0	0	0	1	1	0	0	3	0	0	0	0	1
SEQF2114.1	GCA_000233755.1	Lacticaseibacillus	rhamnosus	Lactobacillales	0	0	0	0	0	0	0	1	1	1	0	1	0	0	0	0	0
SEQF2117.1	GCA_000235865.1	Lacticaseibacillus	rhamnosus	Lactobacillales	0	0	0	0	0	0	0	1	1	1	0	1	0	0	0	0	0
SEQF2118.2	GCA_000195375.2	Lacticaseibacillus	rhamnosus	Lactobacillales	0	0	0	0	0	0	0	0	1	0	0	0	0	0	0	0	0
SEQF2119.2	GCA_000235785.2	Lacticaseibacillus	rhamnosus	Lactobacillales	0	0	0	0	0	0	0	1	1	1	0	1	0	0	0	0	0
SEQF2120.1	GCA_000179475.1	Ligilactobacillus	salivarius	Lactobacillales	0	0	0	0	0	0	0	1	1	0	1	2	0	0	0	1	1
SEQF2121.2	GCA_000217735.2	Ligilactobacillus	salivarius	Lactobacillales	0	0	0	0	0	0	0	1	1	0	1	2	0	0	0	1	1
SEQF2122.2	GCA_000215465.2	Ligilactobacillus	salivarius	Lactobacillales	0	0	0	0	0	0	0	1	1	0	1	2	0	0	0	1	1
SEQF2123.1	GCA_000183845.1	Listeria	monocytogenes	Bacillales	0	0	0	0	0	0	0	1	1	1	0	0	0	0	0	0	0
SEQF2127.1	GCA_000146895.1	Mobiluncus	mulieris	Actinomycetales	1	0	0	0	0	0	0	2	0	0	0	0	0	0	0	0	0
SEQF2128.2	GCA_000148485.2	Mobiluncus	mulieris	Actinomycetales	1	0	0	0	0	0	0	2	0	0	0	0	0	0	0	0	0
SEQF2129.2	GCA_000192965.2	Moraxella	catarrhalis	Moraxellales	1	0	0	0	1	0	1	1	1	0	0	0	0	0	0	0	0
SEQF2130.2	GCA_000193065.2	Moraxella	catarrhalis	Moraxellales	1	0	0	0	1	0	1	1	1	0	2	0	0	0	0	0	0
SEQF2131.2	GCA_000192925.2	Moraxella	catarrhalis	Moraxellales	1	0	0	0	1	0	1	1	1	0	1	0	0	0	0	0	0
SEQF2132.2	GCA_000192905.2	Moraxella	catarrhalis	Moraxellales	1	0	0	0	1	0	1	1	1	0	0	0	0	0	0	0	0
SEQF2133.2	GCA_000192985.2	Moraxella	catarrhalis	Moraxellales	1	0	0	0	1	0	1	1	1	0	1	0	0	0	0	0	0
SEQF2134.2	GCA_000193005.2	Moraxella	catarrhalis	Moraxellales	1	0	0	0	1	0	1	1	1	0	1	0	0	0	0	0	0
SEQF2135.2	GCA_000193025.2	Moraxella	catarrhalis	Moraxellales	1	0	0	0	1	0	1	1	1	0	1	0	0	0	0	0	0
SEQF2136.2	GCA_000193045.2	Moraxella	catarrhalis	Moraxellales	1	0	0	0	1	0	1	1	1	0	2	0	0	0	0	0	0
SEQF2137.2	GCA_000193085.2	Moraxella	catarrhalis	Moraxellales	1	0	0	0	1	0	1	1	1	0	2	0	0	0	0	0	0
SEQF2141.1	GCA_000180595.1	Neisseria	lactamica	Neisseriales	0	1	0	1	1	1	1	1	1	0	1	0	0	0	0	0	0
SEQF2142.1	GCA_000186165.1	Neisseria	mucosa	Neisseriales	0	1	0	1	1	1	1	1	1	0	1	0	0	0	0	0	0
SEQF2145.2	GCA_000183605.2	Porphyromonas	asaccharolytica	Bacteroidales	1	0	0	1	1	1	1	1	2	1	0	0	0	0	0	0	0
SEQF2146.2	GCA_000191765.2	Prevotella	denticola	Bacteroidales	1	0	0	0	1	1	1	1	2	1	0	0	0	0	0	0	0
SEQF2147.1	GCA_000243015.1	Prevotella	maculosa	Bacteroidales	1	0	0	1	1	1	1	1	2	1	0	0	0	0	0	0	0
SEQF2149.1	GCA_000185845.1	Prevotella	salivae	Bacteroidales	1	0	0	0	1	1	1	1	2	1	0	0	0	0	0	0	0
SEQF2150.1	GCA_000236475.1	Lactococcus	lactis	Lactobacillales	1	0	0	0	0	0	0	1	1	0	1	0	0	0	0	1	0
SEQF2151.1	GCA_000143205.1	Lactococcus	lactis	Lactobacillales	1	0	0	0	0	0	0	1	1	0	1	0	0	0	0	0	0
SEQF2152.1	GCA_000192705.1	Lactococcus	lactis	Lactobacillales	1	0	0	0	0	0	0	1	1	0	1	0	0	0	0	0	0
SEQF2153.1	GCA_000196035.1	Listeria	monocytogenes	Bacillales	1	0	0	0	0	0	0	1	1	1	0	0	0	0	0	0	0
SEQF2154.1	GCA_000218305.1	Listeria	monocytogenes	Bacillales	1	0	0	0	0	0	0	1	1	1	0	0	0	0	0	0	0
SEQF2155.1	GCA_000209755.1	Listeria	monocytogenes	Bacillales	1	0	0	0	0	0	0	1	1	1	0	0	0	0	0	0	0
SEQF2156.1	GCA_000283755.1	Mycoplasma	pneumoniae	Mycoplasmatales	0	0	0	0	0	0	0	0	0	0	0	0	0	0	0	0	0
SEQF2157.1	GCA_000143945.1	Mycoplasma	pneumoniae	Mycoplasmatales	0	0	0	0	0	0	0	0	0	0	0	0	0	0	0	0	0
SEQF2159.1	GCA_000196295.1	Neisseria	lactamica	Neisseriales	0	1	0	1	1	1	1	1	1	0	1	0	0	0	0	0	0
SEQF2160.1	GCA_000212375.1	Porphyromonas	asaccharolytica	Bacteroidales	1	0	0	1	1	1	1	1	2	1	0	0	0	0	0	0	0
SEQF2161.1	GCA_000213155.1	Cutibacterium	acnes	Propionibacteriales	1	0	0	0	0	0	0	1	0	0	0	1	0	0	0	0	0
SEQF2162.1	GCA_000217615.1	Cutibacterium	acnes	Propionibacteriales	1	0	0	0	0	0	0	1	0	0	0	1	0	0	0	0	0
SEQF2163.1	GCA_000231215.1	Cutibacterium	acnes	Propionibacteriales	1	0	0	0	0	0	0	1	0	0	0	1	0	0	0	0	0
SEQF2164.1	GCA_000240035.1	Cutibacterium	acnes	Propionibacteriales	1	0	0	0	0	0	0	1	0	0	0	1	0	0	0	0	0
SEQF2165.1	GCA_000240055.1	Cutibacterium	acnes	Propionibacteriales	1	0	0	0	0	0	0	1	0	0	0	1	0	0	0	0	0
SEQF2166.1	GCA_000240015.1	Cutibacterium	acnes	Propionibacteriales	1	0	0	0	0	0	0	1	0	0	0	1	0	0	0	0	0
SEQF2167.1	GCA_000226155.1	Pseudomonas	aeruginosa	Pseudomonadales	2	0	1	0	1	1	1	1	1	1	0	1	0	0	0	0	0
SEQF2168.1	GCA_000284555.1	Pseudomonas	aeruginosa	Pseudomonadales	2	0	1	1	1	1	1	1	1	1	0	1	0	0	0	0	0
SEQF2169.1	GCA_000237065.1	Pseudomonas	fluorescens	Pseudomonadales	3	0	1	1	2	1	1	1	1	1	0	1	0	0	0	0	0
SEQF2170.1	GCA_000219605.1	Pseudomonas	stutzeri	Pseudomonadales	2	0	1	1	1	1	1	1	1	1	0	0	0	0	0	0	0
SEQF2171.1	GCA_000195105.1	Pseudomonas	stutzeri	Pseudomonadales	2	0	1	1	1	1	1	1	1	1	0	0	0	0	0	0	0
SEQF2172.1	GCA_000020205.1	Ralstonia	pickettii	Burkholderiales	0	1	0	1	1	1	1	1	1	1	0	0	0	0	0	0	0
SEQF2173.2	GCA_000025145.2	Staphylococcus	aureus	Bacillales	0	1	1	0	1	1	1	1	1	1	1	1	0	0	1	0	0
SEQF2174.1	GCA_000223885.1	Stenotrophomonas	maltophilia	Xanthomonadales	1	0	1	0	1	1	1	1	1	1	1	2	0	0	0	0	0
SEQF2181.1	GCA_000230295.1	Streptococcus	pyogenes	Lactobacillales	1	0	0	0	0	0	0	1	1	1	1	0	0	0	0	0	0
SEQF2182.1	GCA_000024485.1	Treponema	pallidum	Spirochaetales	0	0	0	0	0	0	0	0	0	0	0	0	0	0	0	0	0
SEQF2183.1	GCA_000184745.1	Variovorax	paradoxus	Burkholderiales	1	0	1	1	1	1	1	1	1	1	0	2	0	0	0	0	0
SEQF2184.1	GCA_000222975.1	Yersinia	pestis	Enterobacterales	1	0	1	1	1	1	1	1	1	1	0	0	0	0	0	0	0
SEQF2185.1	GCA_000022805.1	Yersinia	pestis	Enterobacterales	1	0	1	1	1	1	1	1	1	1	0	0	0	0	0	0	0
SEQF2186.1	GCA_000022825.1	Yersinia	pestis	Enterobacterales	1	0	1	1	1	1	1	1	1	1	0	0	0	0	0	0	0
SEQF2188.1	GCA_000022845.1	Yersinia	pestis	Enterobacterales	1	0	1	1	1	1	1	1	1	1	0	0	0	0	0	0	0
SEQF2189.1	GCA_000178055.1	Cutibacterium	acnes	Propionibacteriales	1	0	0	0	0	0	0	1	0	0	0	1	0	0	0	0	0
SEQF2190.2	GCA_000221125.2	Cutibacterium	acnes	Propionibacteriales	1	0	0	0	0	0	0	1	0	0	0	1	0	0	0	0	0
SEQF2191.2	GCA_000221145.2	Cutibacterium	acnes	Propionibacteriales	1	0	0	0	0	0	0	1	0	0	0	1	0	0	0	0	0
SEQF2192.1	GCA_000178075.1	Cutibacterium	acnes	Propionibacteriales	1	0	0	0	0	0	0	1	0	0	0	1	0	0	0	0	0
SEQF2193.1	GCA_000148745.1	Pseudomonas	aeruginosa	Pseudomonadales	2	0	1	1	1	1	1	1	1	1	0	1	0	0	0	0	0
SEQF2196.1	GCA_000166515.1	Pseudomonas	fluorescens	Pseudomonadales	2	0	1	1	1	1	1	1	1	1	0	1	0	0	0	0	0
SEQF2197.1	GCA_000231235.1	Rothia	mucilaginosa	Micrococcales	1	0	0	0	0	0	0	1	0	0	0	0	0	0	0	0	0
SEQF2199.1	GCA_000178015.1	Staphylococcus	aureus	Bacillales	0	1	1	0	1	1	1	1	1	1	1	1	0	0	1	0	0
SEQF2200.1	GCA_000178035.1	Staphylococcus	aureus	Bacillales	0	1	1	0	1	1	1	1	1	1	1	1	0	0	1	0	0
SEQF2201.1	GCA_000177995.1	Staphylococcus	aureus	Bacillales	0	1	1	0	1	1	1	1	1	1	1	1	0	0	1	0	0
SEQF2204.1	GCA_000183705.1	Staphylococcus	caprae	Bacillales	0	1	1	0	1	1	1	1	1	1	1	1	0	0	1	0	0
SEQF2205.2	GCA_000239515.2	Staphylococcus	epidermidis	Bacillales	0	1	1	0	1	1	1	1	1	1	1	1	0	0	1	0	0
SEQF2206.2	GCA_000186205.2	Staphylococcus	epidermidis	Bacillales	0	1	1	0	1	1	1	1	1	1	1	1	0	0	1	0	0
SEQF2207.1	GCA_000164075.1	Staphylococcus	epidermidis	Bacillales	0	1	1	0	1	1	1	1	1	1	1	1	0	0	1	0	0
SEQF2208.2	GCA_000211215.2	Staphylococcus	warneri	Bacillales	0	1	1	1	1	2	0	1	1	1	1	1	0	0	1	0	0
SEQF2209.2	GCA_000221325.2	Streptococcus	agalactiae	Lactobacillales	1	0	0	0	0	0	0	1	1	1	1	1	0	0	0	0	1
SEQF2210.1	GCA_000186545.1	Streptococcus	anginosus	Lactobacillales	0	0	0	0	0	0	0	1	1	0	1	0	0	0	0	1	0
SEQF2211.2	GCA_000223295.2	Streptococcus	constellatus	Lactobacillales	0	0	0	0	0	0	0	1	1	0	1	0	0	0	0	0	0
SEQF2212.1	GCA_000187465.1	Streptococcus	infantis	Lactobacillales	1	0	1	0	1	1	1	1	1	0	1	0	0	0	0	1	0
SEQF2213.2	GCA_000215385.2	Streptococcus	infantis	Lactobacillales	1	0	0	0	0	0	0	1	1	0	1	0	0	0	0	1	0
SEQF2214.2	GCA_000148975.2	Streptococcus	infantis	Lactobacillales	0	0	1	0	1	1	1	1	0	0	1	0	0	0	0	1	0
SEQF2215.2	GCA_000223255.2	Streptococcus	infantis	Lactobacillales	1	0	0	0	0	0	0	1	1	0	1	0	0	0	0	0	0
SEQF2216.2	GCA_000223335.2	Streptococcus	infantis	Lactobacillales	1	0	1	0	1	1	1	1	1	0	1	0	0	0	0	0	0
SEQF2217.2	GCA_000220045.2	Streptococcus	mitis	Lactobacillales	1	0	1	0	1	1	1	1	1	0	1	0	0	0	0	1	0
SEQF2218.2	GCA_000220085.2	Streptococcus	mitis	Lactobacillales	1	0	1	0	1	1	1	1	1	0	1	0	0	0	0	1	0
SEQF2219.2	GCA_000222785.2	Streptococcus	mitis	Lactobacillales	1	0	1	0	1	1	1	1	1	0	1	0	0	0	0	1	0
SEQF2220.2	GCA_000215365.2	Streptococcus	oralis	Lactobacillales	1	0	1	0	1	1	1	1	1	0	1	0	0	0	0	0	0
SEQF2221.2	GCA_000223235.2	Streptococcus	oralis	Lactobacillales	1	0	1	0	1	1	1	1	1	0	1	0	0	0	0	0	0
SEQF2222.1	GCA_000187505.1	Streptococcus	parasanguinis	Lactobacillales	1	0	0	0	0	0	0	1	1	1	0	0	0	0	0	0	0
SEQF2226.1	GCA_000177775.1	Streptococcus	pneumoniae	Lactobacillales	1	0	0	0	1	1	1	1	1	0	0	0	0	0	0	1	0
SEQF2227.2	GCA_000194885.2	Streptococcus	pneumoniae	Lactobacillales	1	0	0	0	1	1	1	1	1	0	1	0	0	0	0	1	0
SEQF2228.2	GCA_000211875.2	Streptococcus	pneumoniae	Lactobacillales	1	0	0	0	1	1	1	1	1	0	1	0	0	0	0	1	0
SEQF2229.2	GCA_000211895.2	Streptococcus	pneumoniae	Lactobacillales	1	0	0	0	1	1	1	1	1	0	0	0	0	0	0	1	0
SEQF2230.2	GCA_000211915.2	Streptococcus	pneumoniae	Lactobacillales	1	0	0	0	1	1	1	2	1	0	0	0	0	0	0	1	0
SEQF2231.2	GCA_000212555.2	Streptococcus	pneumoniae	Lactobacillales	1	0	0	0	1	1	1	1	1	0	0	0	0	0	0	1	0
SEQF2232.2	GCA_000212535.2	Streptococcus	pneumoniae	Lactobacillales	1	0	0	0	1	1	1	1	1	0	0	0	0	0	0	1	0
SEQF2233.2	GCA_000212515.2	Streptococcus	pneumoniae	Lactobacillales	1	0	0	0	1	1	1	1	1	0	1	0	0	0	0	0	0
SEQF2241.2	GCA_000180515.2	Streptococcus	pneumoniae	Lactobacillales	1	0	0	0	1	1	1	1	1	0	0	0	0	0	0	1	0
SEQF2242.1	GCA_000146715.1	Streptococcus	pyogenes	Lactobacillales	1	0	0	0	0	0	0	1	1	1	1	0	0	0	0	0	0
SEQF2243.1	GCA_000179735.1	Veillonella	atypica	Veillonellales	2	0	1	0	1	1	1	1	1	1	0	0	0	0	0	0	0
SEQF2244.2	GCA_000215025.2	Veillonella	parvula	Veillonellales	2	0	1	0	1	1	1	1	1	1	0	0	0	0	0	0	0
SEQF2247.2	GCA_000228065.2	Streptococcus	sobrinus	Lactobacillales	0	0	0	0	0	0	0	0	0	0	0	0	0	0	0	0	0
SEQF2248.1	GCA_000008945.1	Bifidobacterium	longum	Bifidobacteriales	1	0	0	0	0	0	0	1	0	0	0	2	0	0	0	0	0
SEQF2249.1	GCA_000020425.1	Bifidobacterium	longum	Bifidobacteriales	1	0	0	0	0	0	0	1	0	0	0	4	0	0	0	0	0
SEQF2250.3	GCA_000226735.3	Aggregatibacter	actinomycetemcomitans	Pasteurellales	1	0	0	1	1	1	1	1	1	0	1	0	0	0	0	0	0
SEQF2266.1	GCA_000212975.1	Bordetella	pertussis	Burkholderiales	0	1	0	1	1	1	1	1	1	0	1	0	0	0	0	0	0
SEQF2267.1	GCA_000241875.1	Corynebacterium	diphtheriae	Mycobacteriales	1	0	0	0	0	0	0	1	0	0	0	3	0	0	0	0	1
SEQF2268.1	GCA_000241935.1	Corynebacterium	diphtheriae	Mycobacteriales	1	0	0	0	0	0	0	1	0	0	0	3	0	0	0	0	1
SEQF2269.1	GCA_000255175.1	Corynebacterium	diphtheriae	Mycobacteriales	1	0	0	0	0	0	0	1	0	0	0	3	0	0	0	0	1
SEQF2270.1	GCA_000255215.1	Corynebacterium	diphtheriae	Mycobacteriales	1	0	0	0	0	0	0	1	0	0	0	3	0	0	0	0	1
SEQF2271.1	GCA_000255235.1	Corynebacterium	diphtheriae	Mycobacteriales	1	0	0	0	0	0	0	1	0	0	0	3	0	0	0	0	1
SEQF2272.1	GCA_000255155.1	Corynebacterium	diphtheriae	Mycobacteriales	1	0	0	0	0	0	0	1	0	0	0	3	0	0	0	0	1
SEQF2273.1	GCA_000242775.1	Corynebacterium	diphtheriae	Mycobacteriales	1	0	0	0	0	0	0	1	0	0	0	3	0	0	0	0	1
SEQF2274.1	GCA_000255195.1	Corynebacterium	diphtheriae	Mycobacteriales	2	0	0	0	0	0	0	1	0	0	0	3	0	0	0	0	1
SEQF2275.1	GCA_000241915.1	Corynebacterium	diphtheriae	Mycobacteriales	1	0	0	0	0	0	0	1	0	0	0	3	0	0	0	0	1
SEQF2276.1	GCA_000255275.1	Corynebacterium	diphtheriae	Mycobacteriales	1	0	0	0	0	0	0	1	0	0	0	3	0	0	0	0	1
SEQF2277.1	GCA_000255255.1	Corynebacterium	diphtheriae	Mycobacteriales	1	0	0	0	0	0	0	1	0	0	0	3	0	0	0	0	1
SEQF2278.2	GCA_000211255.2	Enterococcus	faecalis	Lactobacillales	1	0	0	0	0	0	0	1	1	1	0	2	0	0	0	1	1
SEQF2280.2	GCA_000214315.2	Gardnerella	vaginalis	Bifidobacteriales	0	0	0	0	0	0	0	1	0	0	0	3	0	0	0	0	0
SEQF2282.1	GCA_000176495.1	Gardnerella	vaginalis	Bifidobacteriales	0	0	0	0	0	0	0	1	0	0	0	2	0	0	0	0	0
SEQF2283.1	GCA_000224435.1	Mycobacterium	tuberculosis	Mycobacteriales	1	0	0	0	0	0	0	0	0	0	0	1	0	0	0	0	0
SEQF2284.1	GCA_000152165.1	Neisseria	meningitidis	Neisseriales	0	1	0	1	1	1	1	1	1	0	1	0	0	0	0	0	0
SEQF2285.1	GCA_000191425.1	Neisseria	meningitidis	Neisseriales	0	1	0	1	1	1	1	1	1	0	1	0	0	0	0	0	0
SEQF2286.1	GCA_000191445.1	Neisseria	meningitidis	Neisseriales	0	1	0	1	1	1	1	1	1	0	1	0	0	0	0	0	0
SEQF2287.1	GCA_000191525.1	Neisseria	meningitidis	Neisseriales	0	1	0	1	1	1	1	1	1	0	1	0	0	0	0	0	0
SEQF2288.1	GCA_000253215.1	Neisseria	meningitidis	Neisseriales	0	1	0	1	1	1	1	1	1	0	1	0	0	0	0	0	0
SEQF2289.1	GCA_000146565.1	Bacillus	subtilis	Bacillales	1	1	1	0	1	1	1	1	1	1	0	0	0	0	0	0	0
SEQF2290.1	GCA_000227465.1	Bacillus	subtilis	Bacillales	1	1	1	0	1	1	1	1	1	1	0	0	0	0	0	0	0
SEQF2291.1	GCA_000227485.1	Bacillus	subtilis	Bacillales	1	1	1	0	1	1	1	1	1	1	0	0	0	0	0	0	0
SEQF2293.1	GCA_000177595.1	Bacillus	subtilis	Bacillales	1	1	1	0	1	1	1	1	1	1	0	0	0	0	0	0	0
SEQF2294.3	GCA_000226795.3	Aggregatibacter	actinomycetemcomitans	Pasteurellales	1	0	0	1	1	1	1	2	1	0	1	0	0	0	0	0	0
SEQF2295.2	GCA_000226755.2	Aggregatibacter	actinomycetemcomitans	Pasteurellales	1	0	0	1	1	1	1	1	1	0	1	0	0	0	0	0	0
SEQF2296.3	GCA_000226775.3	Aggregatibacter	actinomycetemcomitans	Pasteurellales	1	0	0	1	1	1	1	1	1	0	1	0	0	0	0	0	0
SEQF2297.3	GCA_000226855.3	Aggregatibacter	actinomycetemcomitans	Pasteurellales	1	0	0	1	1	1	1	1	1	0	1	0	0	0	0	0	0
SEQF2298.1	GCA_000185645.1	Gemella	morbillorum	Bacillales	1	0	0	0	0	0	0	1	1	0	1	0	0	0	0	1	0
SEQF2299.1	GCA_000304555.1	Mycobacterium	tuberculosis	Mycobacteriales	1	0	0	0	0	0	0	0	0	0	0	1	0	0	0	0	0
SEQF2300.1	GCA_000284595.1	Stenotrophomonas	maltophilia	Xanthomonadales	1	0	1	0	1	1	1	1	1	1	1	2	0	0	0	0	0
SEQF2301.1	GCA_000250905.1	Streptococcus	pyogenes	Lactobacillales	1	0	0	0	0	0	0	1	1	1	1	0	0	0	0	0	0
SEQF2302.1	GCA_000256665.1	Streptococcus	pneumoniae	Lactobacillales	1	0	0	0	1	1	1	1	1	0	0	0	0	0	0	1	0
SEQF2303.2	GCA_000252225.2	Streptococcus	pneumoniae	Lactobacillales	1	0	0	0	1	1	1	1	1	0	0	0	0	0	0	1	0
SEQF2304.2	GCA_000252205.2	Streptococcus	pneumoniae	Lactobacillales	1	0	0	0	1	1	1	1	1	0	1	0	0	0	0	1	0
SEQF2305.2	GCA_000252245.2	Streptococcus	pneumoniae	Lactobacillales	1	0	0	0	1	1	1	1	1	0	1	0	0	0	0	1	0
SEQF2306.2	GCA_000252185.2	Streptococcus	pneumoniae	Lactobacillales	1	0	0	0	1	1	1	1	1	0	1	0	0	0	0	1	0
SEQF2307.2	GCA_000251525.2	Streptococcus	pneumoniae	Lactobacillales	1	0	0	0	0	1	1	1	1	0	0	0	0	0	0	1	0
SEQF2308.2	GCA_000251085.2	Streptococcus	pneumoniae	Lactobacillales	1	0	0	0	1	1	1	1	1	0	0	0	0	0	0	1	0
SEQF2310.1	GCA_000466165.1	Peptidiphaga	sp._HMT_183	Actinomycetales	1	0	0	0	0	0	0	1	0	0	0	0	0	0	0	0	0
SEQF2313.1	GCA_000466305.1	Schaalia	sp._HMT_877	Actinomycetales	1	0	0	0	0	0	0	1	0	0	0	2	0	0	0	0	0
SEQF2317.2	GCA_000466205.2	Actinomyces	johnsonii	Actinomycetales	1	0	0	0	0	0	0	0	0	0	0	0	0	0	0	0	0
SEQF2319.1	GCA_000466425.1	Capnocytophaga	sp._HMT_863	Flavobacteriales	1	0	0	1	0	0	0	1	1	0	1	0	0	0	0	0	0
SEQF2321.2	GCA_000236125.2	Agrobacterium	tumefaciens	Hyphomicrobiales	1	0	1	0	1	1	0	1	1	1	0	3	0	0	0	0	0
SEQF2322.2	GCA_000233975.2	Agrobacterium	tumefaciens	Hyphomicrobiales	1	0	1	0	1	1	0	1	1	1	0	3	0	0	0	0	0
SEQF2323.1	GCA_000258885.1	Bacillus	anthracis	Bacillales	1	0	1	0	1	1	1	1	1	1	0	3	0	0	0	0	0
SEQF2324.2	GCA_000230755.2	Bacillus	subtilis	Bacillales	1	1	1	0	1	1	1	1	1	1	0	0	0	0	0	0	0
SEQF2325.2	GCA_000257685.2	Bradyrhizobium	elkanii	Hyphomicrobiales	0	0	0	0	0	0	0	0	0	0	0	0	0	0	0	0	0
SEQF2326.1	GCA_000259315.1	Campylobacter	concisus	Campylobacterales	1	0	0	0	1	1	0	1	1	0	1	0	0	0	0	0	0
SEQF2327.1	GCA_000255635.1	Kingella	kingae	Neisseriales	0	1	0	1	1	1	1	1	1	0	1	0	0	0	0	0	0
SEQF2328.1	GCA_000260335.1	Ligilactobacillus	salivarius	Lactobacillales	0	0	0	0	0	0	0	1	1	0	1	2	0	0	0	1	1
SEQF2329.2	GCA_000191325.2	Neisseria	meningitidis	Neisseriales	0	1	0	1	1	1	1	1	1	0	1	0	0	0	0	0	0
SEQF2330.2	GCA_000224275.2	Neisseria	weaveri	Neisseriales	0	1	0	1	1	1	1	1	1	0	1	1	0	0	0	0	0
SEQF2331.2	GCA_000224255.2	Neisseria	weaveri	Neisseriales	0	1	0	1	1	1	1	1	1	0	1	1	0	0	0	0	0
SEQF2332.2	GCA_000262325.2	Pseudomonas	fluorescens	Pseudomonadales	2	0	1	1	1	1	1	1	1	1	0	1	0	0	0	0	0
SEQF2333.2	GCA_000237885.2	Pseudomonas	stutzeri	Pseudomonadales	2	0	1	1	1	1	1	1	1	1	0	0	0	0	0	0	0
SEQF2334.1	GCA_000257765.1	Streptococcus	anginosus	Lactobacillales	0	0	0	0	0	0	0	1	1	0	1	0	0	0	0	0	0
SEQF2336.1	GCA_000258445.1	Streptococcus	intermedius	Lactobacillales	0	0	0	0	0	0	0	1	1	0	1	0	0	0	0	0	0
SEQF2337.1	GCA_000257865.1	Streptococcus	mitis	Lactobacillales	1	0	1	0	1	1	1	1	1	0	1	0	0	0	0	1	0
SEQF2338.1	GCA_000257905.1	Streptococcus	mitis	Lactobacillales	1	0	1	0	1	1	1	1	1	0	1	0	0	0	0	1	0
SEQF2339.1	GCA_000257805.1	Streptococcus	mitis	Lactobacillales	1	0	1	0	1	1	1	1	1	0	1	0	0	0	0	1	0
SEQF2340.1	GCA_000257495.1	Streptococcus	oralis	Lactobacillales	1	0	1	0	1	1	1	1	1	0	1	0	0	0	0	0	0
SEQF2341.1	GCA_000257475.1	Streptococcus	oralis	Lactobacillales	1	0	1	0	1	1	1	1	1	0	1	0	0	0	0	0	0
SEQF2342.1	GCA_000257845.1	Streptococcus	oralis	Lactobacillales	1	0	1	0	1	1	1	1	1	0	1	0	0	0	0	0	0
SEQF2343.1	GCA_000257455.1	Streptococcus	oralis	Lactobacillales	1	0	1	0	1	1	1	1	1	0	1	0	0	0	0	0	0
SEQF2344.1	GCA_000262145.1	Streptococcus	parasanguinis	Lactobacillales	1	0	0	0	0	0	0	1	1	1	0	0	0	0	0	0	0
SEQF2345.2	GCA_000225385.2	Streptococcus	salivarius	Lactobacillales	1	0	1	0	1	1	1	1	1	1	0	0	0	0	0	1	0
SEQF2346.1	GCA_000257585.1	Streptococcus	salivarius	Lactobacillales	1	0	1	0	1	1	1	1	1	1	0	0	0	0	0	0	0
SEQF2347.1	GCA_000262225.1	Fusobacterium	necrophorum	Fusobacteriales	2	0	0	0	1	1	1	1	1	0	1	0	0	0	1	0	0
SEQF2348.1	GCA_000262285.1	Haemophilus	haemolyticus	Pasteurellales	1	0	0	0	0	1	1	1	1	0	1	0	0	0	0	0	0
SEQF2349.1	GCA_000261285.1	Haemophilus	parainfluenzae	Pasteurellales	1	0	0	0	1	1	1	1	1	0	1	0	0	0	0	0	0
SEQF2350.1	GCA_000259485.1	Haemophilus	parainfluenzae	Pasteurellales	1	0	0	0	1	1	1	1	1	0	1	0	0	0	0	0	0
SEQF2351.1	GCA_000260655.1	Neisseria	sicca	Neisseriales	0	1	0	1	1	0	0	1	1	0	1	0	0	0	0	0	0
SEQF2352.3	GCA_000262065.3	Pseudomonas	oleovorans	Pseudomonadales	3	0	2	1	1	2	2	1	1	1	0	0	0	0	0	0	0
SEQF2353.1	GCA_000469385.1	Leptotrichia	sp._HMT_879	Fusobacteriales	1	0	0	0	0	0	0	1	1	0	1	0	0	1	0	0	0
SEQF2355.1	GCA_000467815.1	Porphyromonas	gingivalis	Bacteroidales	1	0	0	1	1	1	1	1	2	1	0	0	0	0	0	0	0
SEQF2356.1	GCA_000467835.1	Porphyromonas	gingivalis	Bacteroidales	1	0	0	1	1	1	1	1	2	1	0	0	0	0	0	0	0
SEQF2357.2	GCA_000467855.2	Porphyromonas	sp._HMT_278	Bacteroidales	1	0	0	1	1	1	1	1	2	1	0	0	0	0	0	0	0
SEQF2361.1	GCA_000306805.1	Streptococcus	intermedius	Lactobacillales	0	0	0	0	0	0	0	1	1	0	1	0	0	0	0	0	0
SEQF2363.1	GCA_000413475.1	Streptococcus	intermedius	Lactobacillales	0	0	0	0	0	0	0	1	1	0	1	0	0	0	0	0	0
SEQF2364.1	GCA_000177435.1	Veillonella	parvula	Veillonellales	2	0	1	0	1	1	1	1	1	1	0	0	0	0	0	0	0
SEQF2366.1	GCA_000467795.1	Porphyromonas	gingivalis	Bacteroidales	1	0	0	1	1	1	1	1	2	1	0	0	0	0	0	0	0
SEQF2367.1	GCA_000261245.1	Bifidobacterium	longum	Bifidobacteriales	1	0	0	0	0	0	0	1	0	0	0	3	0	0	0	0	1
SEQF2368.1	GCA_000261205.1	Bifidobacterium	longum	Bifidobacteriales	1	0	0	0	0	0	0	1	0	0	0	3	0	0	0	0	1
SEQF2369.1	GCA_000261225.1	Bifidobacterium	longum	Bifidobacteriales	1	0	0	0	0	0	0	1	0	0	0	3	0	0	0	0	1
SEQF2370.1	GCA_000261265.1	Bifidobacterium	longum	Bifidobacteriales	1	0	0	0	0	0	0	1	0	0	0	2	0	0	0	0	0
SEQF2374.1	GCA_000284735.1	Lactococcus	lactis	Lactobacillales	1	0	0	0	0	0	0	1	1	0	1	0	0	0	0	0	0
SEQF2375.1	GCA_000292505.1	Mycoplasma	genitalium	Mycoplasmatales	0	0	0	0	0	0	0	0	0	0	0	0	0	0	0	0	0
SEQF2376.1	GCA_000292405.1	Mycoplasma	genitalium	Mycoplasmatales	0	0	0	0	0	0	0	0	0	0	0	0	0	0	0	0	0
SEQF2377.1	GCA_000292445.1	Mycoplasma	genitalium	Mycoplasmatales	0	0	0	0	0	0	0	0	0	0	0	0	0	0	0	0	0
SEQF2378.1	GCA_000292485.1	Mycoplasma	genitalium	Mycoplasmatales	0	0	0	0	0	0	0	0	0	0	0	0	0	0	0	0	0
SEQF2380.1	GCA_000262545.1	Prevotella	bivia	Bacteroidales	1	0	0	1	1	1	1	1	2	1	0	0	0	0	0	0	0
SEQF2381.2	GCA_000263675.2	Pseudomonas	fluorescens	Pseudomonadales	2	0	1	1	1	1	1	1	1	1	0	1	0	0	0	0	0
SEQF2382.1	GCA_000267545.1	Pseudomonas	stutzeri	Pseudomonadales	2	0	1	0	1	1	1	1	1	1	0	0	0	0	0	0	0
SEQF2383.2	GCA_000205405.2	Staphylococcus	epidermidis	Bacillales	0	1	1	0	1	1	1	1	1	1	1	1	0	0	1	0	0
SEQF2384.1	GCA_000263315.1	Streptococcus	pyogenes	Lactobacillales	1	0	0	0	0	0	0	1	1	1	0	0	0	0	0	0	0
SEQF2385.1	GCA_000269805.1	Actinomyces	massiliensis	Actinomycetales	0	0	0	0	0	0	0	0	0	0	0	0	0	0	0	0	0
SEQF2386.1	GCA_000285995.1	Actinomyces	naeslundii	Actinomycetales	1	0	0	0	0	0	0	0	0	0	0	0	0	0	0	0	0
SEQF2387.1	GCA_000277585.1	Capnocytophaga	ochracea	Flavobacteriales	1	0	0	1	0	0	0	1	1	0	1	0	0	0	0	0	0
SEQF2388.1	GCA_000263415.1	Corynebacterium	diphtheriae	Mycobacteriales	1	0	0	0	0	0	0	1	0	0	0	3	0	0	0	0	1
SEQF2389.1	GCA_000292975.1	Fusobacterium	necrophorum	Fusobacteriales	2	0	0	0	1	1	1	1	1	0	1	0	0	0	1	0	0
SEQF2391.1	GCA_000269845.1	Parascardovia	denticolens	Bifidobacteriales	1	0	0	0	0	0	0	1	0	0	0	3	0	0	0	0	0
SEQF2392.1	GCA_000271945.1	Porphyromonas	gingivalis	Bacteroidales	1	0	0	1	1	1	1	1	2	1	0	0	0	0	0	0	0
SEQF2393.1	GCA_000297835.1	Proteus	mirabilis	Enterobacterales	1	0	1	1	1	1	1	1	1	1	0	0	0	0	0	0	0
SEQF2394.1	GCA_000297815.1	Proteus	mirabilis	Enterobacterales	1	0	1	1	1	1	1	1	1	1	0	0	0	0	0	0	0
SEQF2395.1	GCA_000287935.1	Stenotrophomonas	maltophilia	Xanthomonadales	1	0	1	0	1	1	1	1	1	1	1	2	0	0	0	0	0
SEQF2397.1	GCA_000287595.1	Streptococcus	anginosus	Lactobacillales	0	0	0	0	0	0	0	1	1	0	1	0	0	0	0	1	0
SEQF2398.1	GCA_000279535.1	Streptococcus	infantis	Lactobacillales	1	0	1	0	1	1	1	1	1	0	1	0	0	0	0	1	0
SEQF2399.1	GCA_000287715.1	Streptococcus	oralis	Lactobacillales	1	0	1	0	1	1	1	1	1	0	2	0	0	0	0	0	0
SEQF2400.1	GCA_000286295.1	Streptococcus	salivarius	Lactobacillales	1	0	1	0	1	1	1	1	1	1	0	0	0	0	0	1	0
SEQF2406.1	GCA_000297655.1	Fusobacterium	periodonticum	Fusobacteriales	1	0	0	0	0	0	0	1	1	0	1	0	0	1	0	0	0
SEQF2407.1	GCA_000296405.1	Corynebacterium	otitidis	Mycobacteriales	1	0	0	0	0	0	0	1	0	0	0	1	0	0	0	0	0
SEQF2408.1	GCA_000292915.1	Burkholderia	cepacia	Burkholderiales	1	1	0	1	1	1	1	1	1	1	0	1	0	0	0	0	0
SEQF2409.1	GCA_000185185.1	Helicobacter	pylori	Campylobacterales	1	0	0	0	1	1	1	1	1	0	1	0	0	0	0	0	0
SEQF2410.1	GCA_000185225.1	Helicobacter	pylori	Campylobacterales	1	0	0	0	1	1	1	1	1	0	1	0	0	0	0	0	0
SEQF2411.2	GCA_000314675.2	Afipia	broomeae	Hyphomicrobiales	1	0	1	1	1	1	0	1	1	1	0	0	0	0	0	0	0
SEQF2412.1	GCA_000315445.1	Alloiococcus	otitis	Lactobacillales	1	0	0	0	0	0	0	0	0	0	0	0	0	0	0	0	0
SEQF2413.2	GCA_000247755.2	Bifidobacterium	breve	Bifidobacteriales	1	0	0	0	0	0	0	1	0	0	0	2	0	0	0	0	1
SEQF2415.1	GCA_000158015.1	Bifidobacterium	breve	Bifidobacteriales	1	0	0	0	0	0	0	1	0	0	0	2	0	0	0	0	0
SEQF2416.1	GCA_000313615.1	Campylobacter	showae	Campylobacterales	1	0	0	0	1	1	0	1	1	0	1	0	0	0	0	0	0
SEQF2417.1	GCA_000315405.1	Enterococcus	durans	Lactobacillales	0	0	0	0	0	0	0	1	1	1	1	1	0	0	0	0	1
SEQF2418.1	GCA_000159195.1	Lentilactobacillus	buchneri	Lactobacillales	1	0	0	0	0	0	0	1	1	1	0	2	0	0	0	1	0
SEQF2419.1	GCA_000271445.1	Lactiplantibacillus	pentosus	Lactobacillales	1	0	0	0	0	0	0	1	1	0	0	3	0	0	0	0	1
SEQF2420.1	GCA_000301135.1	Lactobacillus	crispatus	Lactobacillales	0	0	0	0	0	0	0	0	0	0	0	2	0	0	0	0	0
SEQF2421.1	GCA_000301115.1	Lactobacillus	crispatus	Lactobacillales	0	0	0	0	0	0	0	0	0	0	0	2	0	0	0	0	0
SEQF2422.2	GCA_000313955.2	Lysinibacillus	fusiformis	Bacillales	1	0	1	0	1	1	1	1	1	1	0	1	0	0	0	0	0
SEQF2423.2	GCA_000297075.2	Pseudomonas	oleovorans	Pseudomonadales	2	0	1	1	1	1	1	1	1	1	0	0	0	0	0	0	0
SEQF2424.1	GCA_000313655.1	Streptococcus	intermedius	Lactobacillales	0	0	0	0	0	0	0	1	1	0	1	0	0	0	0	0	0
SEQF2425.1	GCA_000213865.1	Bifidobacterium	breve	Bifidobacteriales	1	0	0	0	0	0	0	1	0	0	0	2	0	0	0	0	1
SEQF2426.1	GCA_000220135.1	Bifidobacterium	breve	Bifidobacteriales	1	0	0	0	0	0	0	1	0	0	0	2	0	0	0	0	1
SEQF2427.2	GCA_000298115.2	Lentilactobacillus	buchneri	Lactobacillales	1	0	0	0	0	0	0	1	1	0	0	2	0	0	0	1	0
SEQF2428.1	GCA_000211375.1	Lentilactobacillus	buchneri	Lactobacillales	1	0	0	0	0	0	0	1	1	0	0	2	0	0	0	1	0
SEQF2429.1	GCA_000304295.1	Treponema	pallidum	Spirochaetales	0	0	0	0	0	0	0	0	0	0	0	0	0	0	0	0	0
SEQF2430.1	GCA_000466265.1	Schaalia	sp._HMT_172	Actinomycetales	1	0	0	0	0	0	0	1	0	0	0	0	0	0	0	0	0
SEQF2431.1	GCA_000180155.1	Actinomyces	oris	Actinomycetales	0	0	0	0	0	0	0	0	0	0	0	0	0	0	0	0	0
SEQF2434.1	GCA_000175875.1	Campylobacter	gracilis	Campylobacterales	1	0	0	0	1	1	0	1	1	0	1	0	0	0	0	0	0
SEQF2435.1	GCA_000010185.1	Finegoldia	magna	Tissierellales	1	0	0	0	0	0	0	1	1	0	1	1	0	1	0	0	2
SEQF2436.2	GCA_000332915.2	Aggregatibacter	actinomycetemcomitans	Pasteurellales	1	0	0	1	1	1	1	1	1	0	1	0	0	0	0	0	0
SEQF2437.2	GCA_000332955.2	Aggregatibacter	actinomycetemcomitans	Pasteurellales	1	0	0	1	1	1	1	1	0	0	1	0	0	0	0	0	0
SEQF2438.2	GCA_000332935.2	Aggregatibacter	actinomycetemcomitans	Pasteurellales	1	0	0	1	1	1	1	1	1	0	1	0	0	0	0	0	0
SEQF2439.2	GCA_000332895.2	Aggregatibacter	actinomycetemcomitans	Pasteurellales	1	0	0	1	1	1	1	1	1	0	1	0	0	0	0	0	0
SEQF2440.1	GCA_000338095.1	Corynebacterium	urealyticum	Mycobacteriales	1	0	0	0	0	0	0	1	0	0	0	2	0	0	0	0	1
SEQF2441.2	GCA_000338115.2	Lactiplantibacillus	plantarum	Lactobacillales	1	0	0	0	0	0	0	1	1	0	0	3	0	0	0	0	1
SEQF2442.1	GCA_000332735.1	Staphylococcus	warneri	Bacillales	0	1	1	1	1	1	1	1	1	1	1	1	0	0	1	0	0
SEQF2443.1	GCA_000467935.1	Peptoniphilaceae	bacterium_HMT_113	Tissierellales	0	1	1	0	0	0	0	1	1	0	1	3	0	0	0	1	0
SEQF2444.1	GCA_000469505.1	Leptotrichia	sp._HMT_215	Fusobacteriales	0	0	0	0	0	0	0	1	1	0	1	1	0	0	0	0	1
SEQF2445.1	GCA_000466335.1	Aggregatibacter	sp._HMT_458	Pasteurellales	1	0	0	0	0	1	1	1	1	0	1	0	0	0	0	0	0
SEQF2446.1	GCA_000469545.1	Mitsuokella	sp._HMT_131	Selenomonadales	1	1	0	0	1	1	1	1	1	0	1	0	0	0	0	0	0
SEQF2447.1	GCA_000467995.1	Porphyromonas	gingivalis	Bacteroidales	1	0	0	1	1	1	1	1	2	1	0	0	0	0	0	0	0
SEQF2448.1	GCA_000469565.1	Oribacterium	sp._HMT_078	Lachnospirales	0	0	0	0	0	0	0	1	1	0	1	1	0	0	0	1	0
SEQF2449.1	GCA_000466245.1	Actinomyces	johnsonii	Actinomycetales	1	0	0	0	0	0	0	0	0	0	0	0	0	0	0	0	0
SEQF2450.1	GCA_000466185.1	Actinomyces	graevenitzii	Actinomycetales	1	0	0	0	0	0	0	0	0	0	0	1	0	0	0	0	0
SEQF2451.1	GCA_000466365.1	Alloscardovia	omnicolens	Bifidobacteriales	1	0	0	0	0	0	0	1	0	0	0	3	0	0	0	0	0
SEQF2452.1	GCA_000469525.1	Leptotrichia	sp._HMT_225	Fusobacteriales	1	0	0	0	0	0	0	1	1	0	1	0	0	1	0	0	1
SEQF2453.1	GCA_000466505.1	Bacteroides	pyogenes	Bacteroidales	1	0	0	0	1	1	1	1	2	0	1	0	0	0	0	0	0
SEQF2454.1	GCA_000468035.1	Selenomonas	sp._HMT_892	Selenomonadales	1	1	1	0	1	1	1	1	1	0	1	0	0	0	0	0	0
SEQF2455.1	GCA_000466405.1	Olegusella	massiliensis	Coriobacteriales	1	0	0	0	0	0	0	1	1	0	1	1	0	0	0	0	1
SEQF2456.1	GCA_000466585.1	Clostridiales	bacterium_HMT_876	Eubacteriales	1	0	0	0	0	0	0	1	1	2	0	2	0	1	0	1	2
SEQF2457.1	GCA_000467955.1	Porphyromonas	gingivalis	Bacteroidales	1	0	0	1	1	1	1	1	2	1	0	0	0	0	0	0	0
SEQF2458.1	GCA_000467975.1	Porphyromonas	gingivalis	Bacteroidales	1	0	0	1	1	1	1	1	2	1	0	0	0	0	0	0	0
SEQF2460.1	GCA_000469465.1	Gemella	bergeri	Bacillales	1	0	0	0	0	0	0	1	1	0	1	0	0	0	0	1	0
SEQF2461.1	GCA_000378085.1	Prevotella	loescheii	Bacteroidales	0	0	0	0	0	0	0	0	0	0	0	0	0	0	0	0	0
SEQF2462.1	GCA_000468055.1	Treponema	lecithinolyticum	Spirochaetales	0	0	0	0	0	0	0	1	1	0	1	1	0	0	0	0	0
SEQF2463.1	GCA_000260715.1	Bifidobacterium	animalis	Bifidobacteriales	0	0	0	0	0	0	0	1	0	0	0	2	0	0	0	0	0
SEQF2464.1	GCA_000220885.1	Bifidobacterium	animalis	Bifidobacteriales	0	0	0	0	0	0	0	1	0	0	0	3	0	0	0	0	0
SEQF2465.1	GCA_000021425.1	Bifidobacterium	animalis	Bifidobacteriales	0	0	0	0	0	0	0	1	0	0	0	3	0	0	0	0	0
SEQF2466.1	GCA_000277325.1	Bifidobacterium	animalis	Bifidobacteriales	0	0	0	0	0	0	0	1	0	0	0	3	0	0	0	0	0
SEQF2467.2	GCA_000025245.2	Bifidobacterium	animalis	Bifidobacteriales	0	0	0	0	0	0	0	1	0	0	0	3	0	0	0	0	0
SEQF2468.1	GCA_000277345.1	Bifidobacterium	animalis	Bifidobacteriales	0	0	0	0	0	0	0	1	0	0	0	3	0	0	0	0	0
SEQF2469.1	GCA_000022705.1	Bifidobacterium	animalis	Bifidobacteriales	0	0	0	0	0	0	0	1	0	0	0	3	0	0	0	0	0
SEQF2470.2	GCA_000224965.2	Bifidobacterium	animalis	Bifidobacteriales	0	0	0	0	0	0	0	1	0	0	0	3	0	0	0	0	0
SEQF2471.1	GCA_000022965.1	Bifidobacterium	animalis	Bifidobacteriales	0	0	0	0	0	0	0	1	0	0	0	3	0	0	0	0	0
SEQF2472.1	GCA_000092765.1	Bifidobacterium	animalis	Bifidobacteriales	0	0	0	0	0	0	0	1	0	0	0	3	0	0	0	0	0
SEQF2473.1	GCA_000344575.1	Lactococcus	lactis	Lactobacillales	1	0	0	0	0	0	0	1	1	0	1	0	0	0	0	0	0
SEQF2474.1	GCA_000240765.1	Bifidobacterium	animalis	Bifidobacteriales	0	0	0	0	0	0	0	1	0	0	0	3	0	0	0	0	0
SEQF2475.1	GCA_000172535.1	Bifidobacterium	animalis	Bifidobacteriales	0	0	0	0	0	0	0	1	0	0	0	3	0	0	0	0	0
SEQF2476.2	GCA_000344295.2	Campylobacter	showae	Campylobacterales	1	0	0	0	1	1	0	2	1	0	0	0	0	0	0	0	0
SEQF2477.1	GCA_000340375.1	Eggerthia	catenaformis	Erysipelotrichales	0	0	0	0	0	0	0	1	1	0	1	0	0	0	0	1	0
SEQF2478.1	GCA_000344215.1	Stenotrophomonas	maltophilia	Xanthomonadales	1	0	1	0	1	1	1	1	1	1	1	2	0	0	0	0	0
SEQF2479.1	GCA_000188275.1	Streptococcus	sanguinis	Lactobacillales	1	0	0	0	0	0	0	1	1	1	0	0	0	0	0	1	0
SEQF2481.1	GCA_000242235.1	Stomatobaculum	longum	Lachnospirales	0	0	0	0	0	0	0	1	1	0	1	0	0	0	0	0	0
SEQF2482.1	GCA_000349865.1	Agrobacterium	tumefaciens	Hyphomicrobiales	1	0	1	0	1	1	0	1	1	1	0	5	0	0	0	0	0
SEQF2483.1	GCA_000364325.1	Atopobium	minutum	Coriobacteriales	1	0	0	0	0	0	0	1	1	0	1	0	0	0	0	1	0
SEQF2484.1	GCA_000350465.1	Enterococcus	durans	Lactobacillales	0	0	0	0	0	0	0	1	1	1	1	1	0	0	0	1	1
SEQF2485.1	GCA_000349365.1	Desulfobulbus	sp._HMT_041	Desulfobulbales	0	0	0	0	0	0	0	0	0	0	0	0	0	0	0	0	0
SEQF2486.1	GCA_000349345.1	Desulfobulbus	sp._HMT_041	Desulfobulbales	0	0	0	0	0	0	0	0	0	0	0	0	0	0	0	0	0
SEQF2487.1	GCA_000379145.1	Bradyrhizobium	elkanii	Hyphomicrobiales	0	0	0	0	0	0	0	0	0	0	0	0	0	0	0	0	0
SEQF2488.1	GCA_000376325.1	Campylobacter	curvus	Campylobacterales	0	0	0	0	0	0	0	0	0	0	0	0	0	0	0	0	0
SEQF2490.1	GCA_000373785.1	Erysipelothrix	tonsillarum	Erysipelotrichales	0	0	0	0	0	0	0	0	0	0	0	0	0	0	0	0	0
SEQF2491.1	GCA_000263595.1	Gardnerella	vaginalis	Bifidobacteriales	0	0	0	0	0	0	0	1	0	0	0	2	0	0	0	0	0
SEQF2492.1	GCA_000263435.1	Gardnerella	vaginalis	Bifidobacteriales	0	0	0	0	0	0	0	1	0	0	0	4	0	0	0	0	0
SEQF2493.1	GCA_000309645.1	Lacticaseibacillus	casei	Lactobacillales	0	0	0	0	0	0	0	1	1	1	0	0	0	0	0	1	0
SEQF2494.1	GCA_000309765.1	Lacticaseibacillus	casei	Lactobacillales	0	0	0	0	0	0	0	1	1	1	0	1	0	0	0	1	0
SEQF2495.1	GCA_000309785.1	Lacticaseibacillus	casei	Lactobacillales	0	0	0	0	0	0	0	1	1	1	0	0	0	0	0	1	0
SEQF2496.1	GCA_000309665.1	Lacticaseibacillus	casei	Lactobacillales	0	0	0	0	0	0	0	1	1	1	0	0	0	0	0	0	0
SEQF2497.1	GCA_000283135.1	Lactobacillus	gasseri	Lactobacillales	0	0	0	0	0	0	0	0	0	0	0	1	0	0	0	0	0
SEQF2498.1	GCA_000347515.1	Lactiplantibacillus	plantarum	Lactobacillales	1	0	0	0	0	0	0	1	1	0	0	3	0	0	0	0	1
SEQF2499.1	GCA_000311945.1	Lacticaseibacillus	rhamnosus	Lactobacillales	0	0	0	0	0	0	0	1	1	1	0	0	0	0	0	0	0
SEQF2500.1	GCA_000311965.1	Lacticaseibacillus	rhamnosus	Lactobacillales	0	0	0	0	0	0	0	1	1	1	0	0	0	0	0	0	0
SEQF2501.1	GCA_000373045.1	Leptotrichia	shahii	Fusobacteriales	0	0	0	0	0	0	0	0	0	0	0	0	0	0	0	0	0
SEQF2502.1	GCA_000373345.1	Leptotrichia	wadei	Fusobacteriales	0	0	0	0	0	0	0	0	0	0	0	0	0	0	0	0	0
SEQF2505.1	GCA_000378725.1	Peptoniphilus	lacrimalis	Tissierellales	0	0	0	0	0	0	0	0	0	0	0	0	0	0	0	0	0
SEQF2506.1	GCA_000381525.1	Peptostreptococcus	anaerobius	Peptostreptococcales	0	0	0	0	0	0	0	0	0	0	0	0	0	0	0	0	0
SEQF2507.1	GCA_000380305.1	Porphyromonas	gingivalis	Bacteroidales	1	0	0	1	1	2	0	1	2	1	0	0	0	0	0	0	0
SEQF2508.1	GCA_000382385.1	Prevotella	maculosa	Bacteroidales	0	0	0	0	0	0	0	0	0	0	0	0	0	0	0	0	0
SEQF2509.1	GCA_000373705.1	Prevotella	micans	Bacteroidales	0	0	0	0	0	0	0	0	0	0	0	0	0	0	0	0	0
SEQF2510.1	GCA_000377685.1	Prevotella	oris	Bacteroidales	0	0	0	0	0	0	0	0	0	0	0	0	0	0	0	0	0
SEQF2511.1	GCA_000377625.1	Prevotella	veroralis	Bacteroidales	0	0	0	0	0	0	0	0	0	0	0	0	0	0	0	0	0
SEQF2513.1	GCA_000263395.1	Pseudomonas	stutzeri	Pseudomonadales	2	0	1	1	1	1	1	1	1	1	0	0	0	0	0	0	0
SEQF2514.1	GCA_000372665.1	Ralstonia	pickettii	Burkholderiales	1	1	0	1	1	1	1	1	1	1	0	0	0	0	0	0	0
SEQF2515.1	GCA_000346445.1	Stenotrophomonas	maltophilia	Xanthomonadales	1	0	1	0	1	1	1	1	1	1	1	2	0	0	0	0	0
SEQF2516.1	GCA_000347435.1	Streptococcus	agalactiae	Lactobacillales	1	0	0	0	0	0	0	1	1	1	1	1	0	0	0	0	1
SEQF2517.1	GCA_000347935.1	Streptococcus	sobrinus	Lactobacillales	1	0	1	0	1	1	1	1	1	1	0	0	0	0	0	1	0
SEQF2520.1	GCA_000385925.1	Streptococcus	cristatus	Lactobacillales	1	0	0	0	0	0	0	1	1	1	0	1	0	0	0	1	1
SEQF2521.1	GCA_000279165.1	Pseudomonas	stutzeri	Pseudomonadales	1	0	1	0	1	1	1	1	1	1	0	0	0	0	0	0	0
SEQF2522.1	GCA_000367205.1	Cutibacterium	avidum	Propionibacteriales	1	0	0	0	0	0	0	1	0	0	0	1	0	0	0	0	0
SEQF2523.1	GCA_000413355.1	Prevotella	oralis	Bacteroidales	1	0	0	0	1	1	1	1	2	1	0	0	0	0	0	0	0
SEQF2524.1	GCA_000385075.1	Mycoplasma	hominis	Mycoplasmatales	0	0	0	0	0	0	0	0	0	0	0	0	0	0	0	0	0
SEQF2525.1	GCA_000410795.1	Lactiplantibacillus	plantarum	Lactobacillales	1	0	0	0	0	0	0	1	1	0	0	3	0	0	0	0	1
SEQF2526.1	GCA_000409835.1	Lacticaseibacillus	paracasei	Lactobacillales	0	0	0	0	0	0	0	1	1	1	0	0	0	0	0	1	0
SEQF2527.1	GCA_000409815.1	Lacticaseibacillus	paracasei	Lactobacillales	0	0	0	0	0	0	0	1	1	1	0	1	0	0	0	1	0
SEQF2528.1	GCA_000409935.1	Lacticaseibacillus	paracasei	Lactobacillales	0	0	0	0	0	0	0	1	1	1	0	0	0	0	0	1	0
SEQF2529.3	GCA_000158215.3	Fusobacterium	periodonticum	Fusobacteriales	1	0	0	0	0	0	0	1	1	0	1	0	0	1	0	0	0
SEQF2530.2	GCA_000218645.2	Fusobacterium	nucleatum	Fusobacteriales	1	0	0	0	0	0	0	1	1	0	1	0	0	1	0	0	0
SEQF2531.1	GCA_000218655.1	Fusobacterium	nucleatum	Fusobacteriales	1	0	0	0	0	0	0	1	1	0	1	0	0	1	0	0	0
SEQF2532.2	GCA_000158295.2	Fusobacterium	necrophorum	Fusobacteriales	2	0	0	0	1	1	1	1	1	0	1	0	0	0	1	0	0
SEQF2533.1	GCA_000407005.1	Enterococcus	saccharolyticus	Lactobacillales	0	0	0	0	0	0	0	1	1	1	0	1	0	0	0	0	1
SEQF2534.1	GCA_000406985.1	Enterococcus	durans	Lactobacillales	0	0	0	0	0	0	0	1	1	1	1	1	0	0	0	1	1
SEQF2535.1	GCA_000411435.1	Bifidobacterium	breve	Bifidobacteriales	1	0	0	0	0	0	0	1	0	0	0	2	0	0	0	0	1
SEQF2536.1	GCA_000411215.1	Delftia	acidovorans	Burkholderiales	1	0	1	1	1	1	1	1	1	1	0	0	0	0	0	0	0
SEQF2537.1	GCA_000411195.1	Delftia	acidovorans	Burkholderiales	1	0	1	1	1	1	1	1	1	1	0	0	0	0	0	0	0
SEQF2539.1	GCA_000400875.1	Fusobacterium	nucleatum	Fusobacteriales	1	0	0	0	0	0	0	1	1	0	1	0	0	1	0	0	0
SEQF2540.2	GCA_000389675.2	Lactobacillus	acidophilus	Lactobacillales	0	0	0	0	0	0	0	0	0	0	0	1	0	0	0	0	0
SEQF2541.1	GCA_000397165.1	Limosilactobacillus	fermentum	Lactobacillales	1	0	0	0	0	0	0	0	0	0	0	2	0	0	0	0	0
SEQF2542.1	GCA_000412205.1	Lactiplantibacillus	plantarum	Lactobacillales	1	0	0	0	0	0	0	1	1	0	0	3	0	0	0	0	1
SEQF2543.2	GCA_000392485.2	Lactiplantibacillus	plantarum	Lactobacillales	1	0	0	0	0	0	0	1	1	0	0	3	0	0	0	0	1
SEQF2544.1	GCA_000410995.1	Limosilactobacillus	reuteri	Lactobacillales	1	0	0	0	0	0	0	1	0	0	0	3	0	0	0	0	0
SEQF2545.1	GCA_000387485.1	Treponema	pallidum	Spirochaetales	0	0	0	0	0	0	0	0	0	0	0	0	0	0	0	0	0
SEQF2546.1	GCA_000967095.1	Achromobacter	xylosoxidans	Burkholderiales	1	1	0	1	1	1	1	1	1	0	1	0	0	0	0	0	0
SEQF2547.1	GCA_000420505.1	Alloscardovia	omnicolens	Bifidobacteriales	0	0	0	0	0	0	0	0	0	0	0	0	0	0	0	0	0
SEQF2549.1	GCA_000414945.1	Enterococcus	casseliflavus	Lactobacillales	0	0	0	0	0	0	0	1	1	1	0	0	0	0	0	0	0
SEQF2550.1	GCA_000158235.1	Fusobacterium	gonidiaformans	Fusobacteriales	2	0	0	0	1	1	1	1	1	0	1	0	0	0	1	0	0
SEQF2551.1	GCA_000442865.1	Lactobacillus	acidophilus	Lactobacillales	0	0	0	0	0	0	0	0	0	0	0	1	0	0	0	0	0
SEQF2552.1	GCA_000442825.1	Lactobacillus	acidophilus	Lactobacillales	0	0	0	0	0	0	0	0	0	0	0	1	0	0	0	0	0
SEQF2553.1	GCA_000420105.1	Mycoplasma	orale	Mycoplasmatales	0	0	0	0	0	0	0	0	0	0	0	0	0	0	0	0	0
SEQF2554.1	GCA_000439065.1	Prevotella	intermedia	Bacteroidales	0	0	0	0	0	0	0	0	0	0	0	0	0	0	0	0	0
SEQF2555.1	GCA_000163935.1	Fusobacterium	periodonticum	Fusobacteriales	1	0	0	0	0	0	0	1	1	0	1	0	0	1	0	0	0
SEQF2557.2	GCA_000439915.2	Lactobacillus	gasseri	Lactobacillales	0	0	0	0	0	0	0	0	0	0	0	1	0	0	0	0	0
SEQF2558.2	GCA_000406345.2	Lactobacillus	gasseri	Lactobacillales	0	0	0	0	0	0	0	0	0	0	0	1	0	0	0	0	0
SEQF2559.1	GCA_000447965.1	Lactococcus	lactis	Lactobacillales	1	0	0	0	0	0	0	0	1	0	0	0	0	0	0	0	0
SEQF2560.1	GCA_000447905.1	Lactococcus	lactis	Lactobacillales	1	0	0	0	0	0	0	0	1	0	1	0	0	0	0	0	0
SEQF2561.1	GCA_000447985.1	Lactococcus	lactis	Lactobacillales	1	0	0	0	0	0	0	0	1	0	1	0	0	0	0	0	0
SEQF2563.1	GCA_000421205.1	Prevotella	denticola	Bacteroidales	0	0	0	0	0	0	0	0	0	0	0	0	0	0	0	0	0
SEQF2564.1	GCA_000448705.1	Veillonella	parvula	Veillonellales	2	0	1	0	1	1	1	1	1	1	0	0	0	0	0	0	0
SEQF2565.1	GCA_000359625.1	Levilactobacillus	brevis	Lactobacillales	0	0	0	0	0	0	0	1	1	0	0	4	0	0	0	0	0
SEQF2566.1	GCA_000418515.1	Lacticaseibacillus	casei	Lactobacillales	0	0	0	0	0	0	0	1	1	1	0	1	0	0	0	1	0
SEQF2567.1	GCA_000439275.1	Limosilactobacillus	reuteri	Lactobacillales	1	0	0	0	0	0	0	1	0	0	0	3	0	0	0	0	0
SEQF2568.1	GCA_000418475.1	Lacticaseibacillus	rhamnosus	Lactobacillales	0	0	0	0	0	0	0	1	1	1	0	1	0	0	0	0	0
SEQF2569.1	GCA_000418495.1	Lacticaseibacillus	rhamnosus	Lactobacillales	0	0	0	0	0	0	0	1	1	1	0	1	0	0	0	0	0
SEQF2570.1	GCA_000312685.1	Lactococcus	lactis	Lactobacillales	1	0	0	0	0	0	0	1	1	0	1	0	0	0	0	1	0
SEQF2571.2	GCA_000331085.2	Mycoplasma	pneumoniae	Mycoplasmatales	0	0	0	0	0	0	0	0	0	0	0	0	0	0	0	0	0
SEQF2572.1	GCA_000444425.1	Proteus	mirabilis	Enterobacterales	1	0	1	1	1	1	1	1	1	1	0	0	0	0	0	0	0
SEQF2573.1	GCA_000429225.1	Actinomyces	dentalis	Actinomycetales	0	0	0	0	0	0	0	0	0	0	0	0	0	0	0	0	0
SEQF2574.1	GCA_000429245.1	Schaalia	georgiae	Actinomycetales	0	0	0	0	0	0	0	0	0	0	0	0	0	0	0	0	0
SEQF2575.1	GCA_000429265.1	Actinomyces	gerencseriae	Actinomycetales	0	0	0	0	0	0	0	0	0	0	0	0	0	0	0	0	0
SEQF2576.1	GCA_000466545.1	Bifidobacterium	breve	Bifidobacteriales	1	0	0	0	0	0	0	1	0	0	0	2	0	0	0	0	1
SEQF2577.1	GCA_000426405.1	Bifidobacterium	subtile	Bifidobacteriales	0	0	0	0	0	0	0	0	0	0	0	0	0	0	0	0	0
SEQF2578.1	GCA_000466705.1	Campylobacter	concisus	Campylobacterales	1	0	0	0	1	1	0	1	1	0	1	0	0	0	0	0	0
SEQF2579.1	GCA_000466745.1	Campylobacter	concisus	Campylobacterales	1	0	0	0	1	1	0	1	1	0	1	0	0	0	0	0	0
SEQF2580.1	GCA_000466665.1	Campylobacter	concisus	Campylobacterales	1	0	0	0	1	1	0	1	1	0	1	0	0	0	0	0	0
SEQF2581.1	GCA_000428965.1	Leptotrichia	hofstadii	Fusobacteriales	0	0	0	0	0	0	0	0	0	0	0	0	0	0	0	0	0
SEQF2582.1	GCA_000426585.1	Prevotella	baroniae	Bacteroidales	0	0	0	0	0	0	0	0	0	0	0	0	0	0	0	0	0
SEQF2583.1	GCA_000426605.1	Acidipropionibacterium	acidifaciens	Propionibacteriales	0	0	0	0	0	0	0	0	0	0	0	0	0	0	0	0	0
SEQF2584.1	GCA_000426665.1	Selenomonas	artemidis	Selenomonadales	0	0	0	0	0	0	0	0	0	0	0	0	0	0	0	0	0
SEQF2585.1	GCA_000425005.1	Solobacterium	moorei	Erysipelotrichales	0	0	0	0	0	0	0	0	0	0	0	0	0	0	0	0	0
SEQF2586.1	GCA_000463015.1	Variovorax	paradoxus	Burkholderiales	1	0	1	1	1	1	1	1	1	1	0	2	0	0	0	0	0
SEQF2587.1	GCA_000463465.1	Streptococcus	anginosus	Lactobacillales	0	0	0	0	0	0	0	1	1	0	1	0	0	0	0	1	0
SEQF2588.1	GCA_000463505.1	Streptococcus	anginosus	Lactobacillales	0	0	0	0	0	0	0	1	1	0	1	0	0	0	0	0	0
SEQF2589.1	GCA_000463425.1	Streptococcus	constellatus	Lactobacillales	0	0	0	0	0	0	0	1	1	0	1	0	0	0	0	0	0
SEQF2590.1	GCA_000463395.1	Streptococcus	constellatus	Lactobacillales	0	0	0	0	0	0	0	1	1	0	1	0	0	0	0	0	0
SEQF2591.1	GCA_000463445.1	Streptococcus	constellatus	Lactobacillales	0	0	0	0	0	0	0	1	1	0	1	0	0	0	0	0	0
SEQF2592.1	GCA_000463355.1	Streptococcus	intermedius	Lactobacillales	0	0	0	0	0	0	0	1	1	0	1	0	0	0	0	0	0
SEQF2593.1	GCA_000463385.1	Streptococcus	intermedius	Lactobacillales	0	0	0	0	0	0	0	1	1	0	1	0	0	0	0	0	0
SEQF2594.1	GCA_000295095.1	Actinomyces	timonensis	Actinomycetales	0	0	0	0	0	0	0	0	0	0	0	0	0	0	0	0	0
SEQF2600.1	GCA_000469705.1	Lactobacillus	acidophilus	Lactobacillales	0	0	0	0	0	0	0	0	0	0	0	1	0	0	0	0	0
SEQF2601.1	GCA_000469765.1	Lactobacillus	acidophilus	Lactobacillales	0	0	0	0	0	0	0	0	0	0	0	1	0	0	0	0	0
SEQF2602.1	GCA_000469745.1	Lactobacillus	acidophilus	Lactobacillales	0	0	0	0	0	0	0	0	0	0	0	1	0	0	0	0	0
SEQF2603.1	GCA_000471925.1	Ralstonia	pickettii	Burkholderiales	1	1	0	1	1	1	1	1	1	1	0	0	0	0	0	0	0
SEQF2604.1	GCA_000478345.1	Enterobacter	cancerogenus	Enterobacterales	0	0	0	0	0	0	0	0	0	0	0	0	0	0	0	0	0
SEQF2605.1	GCA_000477515.1	Limosilactobacillus	fermentum	Lactobacillales	1	0	0	0	0	0	0	0	0	0	0	2	0	0	0	0	0
SEQF2607.1	GCA_000485555.1	Mycoplasma	salivarium	Mycoplasmatales	0	0	0	0	0	0	0	0	0	0	0	0	0	0	0	0	0
SEQF2609.1	GCA_000478925.1	Streptococcus	anginosus	Lactobacillales	0	0	0	0	0	0	0	1	1	0	1	0	0	0	0	0	0
SEQF2610.1	GCA_000508285.1	Achromobacter	xylosoxidans	Burkholderiales	1	1	0	1	1	1	1	1	1	0	1	0	0	0	0	0	0
SEQF2611.1	GCA_000498675.1	Lactobacillus	johnsonii	Lactobacillales	0	0	0	0	0	0	0	0	0	0	0	1	0	0	0	0	0
SEQF2613.1	GCA_000413435.1	Campylobacter	ureolyticus	Campylobacterales	1	0	0	0	1	1	0	1	1	0	1	0	0	0	0	0	0
SEQF2614.1	GCA_000374605.1	Campylobacter	ureolyticus	Campylobacterales	0	0	0	0	0	0	0	0	0	0	0	0	0	0	0	0	0
SEQF2615.1	GCA_000504685.1	Eikenella	corrodens	Neisseriales	0	1	0	0	0	1	1	1	1	0	1	0	0	0	0	0	0
SEQF2616.1	GCA_000503975.1	Porphyromonas	gingivalis	Bacteroidales	1	0	0	1	1	1	1	1	2	0	0	0	0	0	0	0	0
SEQF2617.1	GCA_000507825.1	Prevotella	nigrescens	Bacteroidales	1	0	0	0	1	1	1	1	2	1	0	0	0	0	0	0	0
SEQF2618.1	GCA_000507905.1	Prevotella	oralis	Bacteroidales	1	0	0	0	1	1	1	1	2	1	0	0	0	0	0	0	0
SEQF2619.2	GCA_000506425.2	Rhodobacter	capsulatus	Rhodobacterales	0	1	0	0	0	0	0	1	1	1	0	1	0	0	0	0	0
SEQF2620.1	GCA_000505785.1	Rhodobacter	capsulatus	Rhodobacterales	0	1	0	0	0	0	0	1	1	1	0	1	0	0	0	0	0
SEQF2621.2	GCA_000506565.2	Rhodobacter	capsulatus	Rhodobacterales	0	1	0	0	0	0	0	1	1	1	0	1	0	0	0	0	0
SEQF2622.2	GCA_000506965.2	Rhodobacter	capsulatus	Rhodobacterales	0	1	0	0	0	0	0	1	1	1	0	1	0	0	0	0	0
SEQF2623.2	GCA_000506525.2	Rhodobacter	capsulatus	Rhodobacterales	0	1	0	0	0	0	0	1	1	1	0	1	0	0	0	0	0
SEQF2624.2	GCA_000506545.2	Rhodobacter	capsulatus	Rhodobacterales	0	1	0	0	0	0	0	1	1	1	0	1	0	0	0	0	0
SEQF2625.1	GCA_000507765.1	Streptococcus	parasanguinis	Lactobacillales	1	0	0	0	0	0	0	1	1	1	0	0	0	0	0	0	0
SEQF2626.1	GCA_000350285.1	Absconditabacteria	bacterium_HMT_874	Candidatus Absconditabacteria	0	0	0	0	0	0	0	0	0	0	0	0	0	0	0	0	0
SEQF2628.1	GCA_000529385.1	Ligilactobacillus	salivarius	Lactobacillales	0	0	0	0	0	0	0	1	1	0	1	1	0	0	0	1	0
SEQF2629.1	GCA_000516535.1	Pseudoleptotrichia	goodfellowii	Fusobacteriales	0	0	0	0	0	0	0	0	0	0	0	0	0	0	0	0	0
SEQF2630.1	GCA_000525775.1	Mogibacterium	timidum	Peptostreptococcales	1	0	0	0	0	0	0	1	1	0	1	0	0	0	0	0	0
SEQF2631.1	GCA_000524335.1	Olsenella	uli	Coriobacteriales	1	0	0	0	0	0	0	1	1	0	1	0	0	0	0	1	0
SEQF2632.1	GCA_000565015.1	Porphyromonas	catoniae	Bacteroidales	1	0	0	1	1	1	1	1	2	1	0	0	0	0	0	0	0
SEQF2633.1	GCA_000508585.1	Veillonella	dispar	Veillonellales	2	0	1	0	1	1	1	3	2	1	0	0	0	0	0	0	0
SEQF2634.1	GCA_000510545.1	Tannerella	sp._HMT_286	Bacteroidales	0	0	0	0	1	1	1	1	3	0	1	1	0	0	0	0	0
SEQF2635.1	GCA_000510385.1	Tannerella	sp._HMT_286	Bacteroidales	1	0	0	0	1	1	1	1	2	0	1	1	0	0	0	0	0
SEQF2636.1	GCA_000510505.1	Tannerella	sp._HMT_286	Bacteroidales	1	0	0	0	1	1	1	1	2	0	1	1	0	0	0	0	0
SEQF2637.1	GCA_000510525.1	Tannerella	sp._HMT_286	Bacteroidales	1	0	0	0	1	1	1	1	2	0	1	1	0	0	0	0	0
SEQF2638.1	GCA_000510565.1	Tannerella	sp._HMT_286	Bacteroidales	1	0	0	0	1	1	1	1	1	0	1	1	0	0	0	0	0
SEQF2641.1	GCA_000406805.1	Anaerolineae	bacterium_HMT_439	Anaerolineae	0	0	0	0	0	0	0	0	0	0	0	0	0	0	0	0	0
SEQF2642.1	GCA_000582635.1	Finegoldia	magna	Tissierellales	1	0	0	0	0	0	0	1	1	0	1	1	0	1	0	0	2
SEQF2643.1	GCA_000257785.1	Streptococcus	constellatus	Lactobacillales	0	0	0	0	0	0	0	1	1	0	1	0	0	0	0	0	0
SEQF2664.1	GCA_000385435.1	Bartonella	schoenbuchensis	Hyphomicrobiales	1	0	0	0	0	0	0	1	0	0	0	0	0	0	0	0	0
SEQF2665.1	GCA_000428105.1	Bacteroides	pyogenes	Bacteroidales	0	0	0	0	0	0	0	0	0	0	0	0	0	0	0	0	0
SEQF2666.1	GCA_000511775.1	Bacteroides	pyogenes	Bacteroidales	1	0	0	0	1	1	1	2	2	0	1	0	0	0	0	0	0
SEQF2667.1	GCA_000511735.1	Bacteroides	pyogenes	Bacteroidales	1	0	0	0	1	1	1	2	2	0	1	0	0	0	0	0	0
SEQF2668.1	GCA_000511755.1	Bacteroides	pyogenes	Bacteroidales	1	0	0	0	1	1	1	2	2	0	1	0	0	0	0	0	0
SEQF2669.1	GCA_000319615.1	Cronobacter	sakazakii	Enterobacterales	1	0	1	1	1	0	1	1	1	1	1	1	0	0	0	0	0
SEQF2670.1	GCA_000600355.1	Fusobacterium	necrophorum	Fusobacteriales	2	0	0	0	1	1	1	1	1	0	1	0	0	0	1	0	0
SEQF2671.1	GCA_000529525.1	Methanobrevibacter	oralis	Methanobacteriales	0	0	0	0	0	0	0	0	0	0	0	0	0	0	0	0	0
SEQF2672.3	GCA_000317305.3	Mycolicibacterium	neoaurum	Mycobacteriales	1	0	0	0	0	0	0	1	0	0	0	1	0	0	0	0	0
SEQF2673.1	GCA_000585655.1	Brucella	anthropi	Hyphomicrobiales	1	0	1	0	2	1	0	1	1	1	0	2	0	0	0	0	0
SEQF2674.1	GCA_000613705.1	Porphyromonas	uenonis	Bacteroidales	0	0	0	0	0	0	0	0	0	0	0	0	0	0	0	0	0
SEQF2675.1	GCA_000613565.1	Prevotella	baroniae	Bacteroidales	0	0	0	0	0	0	0	0	0	0	0	0	0	0	0	0	0
SEQF2676.1	GCA_000613585.1	Prevotella	denticola	Bacteroidales	0	0	0	0	0	0	0	0	0	0	0	0	0	0	0	0	0
SEQF2677.1	GCA_000613405.1	Prevotella	enoeca	Bacteroidales	0	0	0	0	0	0	0	0	0	0	0	0	0	0	0	0	0
SEQF2678.1	GCA_000614245.1	Prevotella	fusca	Bacteroidales	0	0	0	0	0	0	0	0	0	0	0	0	0	0	0	0	0
SEQF2679.1	GCA_000613925.1	Prevotella	histicola	Bacteroidales	0	0	0	0	0	0	0	0	0	0	0	0	0	0	0	0	0
SEQF2680.1	GCA_000613965.1	Prevotella	maculosa	Bacteroidales	0	0	0	0	0	0	0	0	0	0	0	0	0	0	0	0	0
SEQF2681.1	GCA_000613625.1	Prevotella	marshii	Bacteroidales	0	0	0	0	0	0	0	0	0	0	0	0	0	0	0	0	0
SEQF2682.1	GCA_000614105.1	Prevotella	micans	Bacteroidales	0	0	0	0	0	0	0	0	0	0	0	0	0	0	0	0	0
SEQF2683.1	GCA_000613505.1	Prevotella	oris	Bacteroidales	0	0	0	0	0	0	0	0	0	0	0	0	0	0	0	0	0
SEQF2684.1	GCA_000613785.1	Prevotella	oulorum	Bacteroidales	0	0	0	0	0	0	0	0	0	0	0	0	0	0	0	0	0
SEQF2685.1	GCA_000614205.1	Prevotella	saccharolytica	Bacteroidales	0	0	0	0	0	0	0	0	0	0	0	0	0	0	0	0	0
SEQF2686.1	GCA_000614285.1	Prevotella	scopos	Bacteroidales	0	0	0	0	0	0	0	0	0	0	0	0	0	0	0	0	0
SEQF2687.1	GCA_000613445.1	Prevotella	shahii	Bacteroidales	0	0	0	0	0	0	0	0	0	0	0	0	0	0	0	0	0
SEQF2688.1	GCA_000613325.1	Prevotella	veroralis	Bacteroidales	0	0	0	0	0	0	0	0	0	0	0	0	0	0	0	0	0
SEQF2689.3	GCA_000175315.3	Actinomyces	viscosus	Actinomycetales	1	0	0	0	0	0	0	0	0	0	0	0	0	0	0	0	0
SEQF2690.1	GCA_000504545.1	Cronobacter	sakazakii	Enterobacterales	1	0	1	1	1	1	1	1	1	1	1	1	1	0	0	0	0
SEQF2691.1	GCA_000263215.1	Cronobacter	sakazakii	Enterobacterales	1	0	1	1	1	1	1	1	1	1	1	1	0	0	0	0	0
SEQF2692.1	GCA_000339015.1	Cronobacter	sakazakii	Enterobacterales	1	0	1	1	1	1	1	1	1	1	1	1	0	0	0	0	0
SEQF2695.1	GCA_000632755.1	Pseudomonas	otitidis	Pseudomonadales	0	0	0	0	0	0	0	0	0	0	0	0	0	0	0	0	0
SEQF2696.1	GCA_000297275.1	Pseudomonas	aeruginosa	Pseudomonadales	2	0	1	0	1	1	1	1	1	1	0	1	0	0	0	0	0
SEQF2697.1	GCA_000297315.1	Pseudomonas	aeruginosa	Pseudomonadales	2	0	1	1	1	1	1	1	1	1	0	1	0	0	0	0	0
SEQF2703.1	GCA_000455785.1	Corynebacterium	diphtheriae	Mycobacteriales	1	0	0	0	0	0	0	2	0	0	0	3	0	0	0	0	1
SEQF2704.1	GCA_000455805.1	Corynebacterium	diphtheriae	Mycobacteriales	1	0	0	0	0	0	0	1	0	0	0	3	0	0	0	0	1
SEQF2705.1	GCA_000711965.1	Actinomyces	israelii	Actinomycetales	0	0	0	0	0	0	0	0	0	0	0	0	0	0	0	0	0
SEQF2707.1	GCA_000741405.1	Bifidobacterium	scardovii	Bifidobacteriales	1	0	0	0	0	0	0	1	0	0	0	5	0	0	0	0	0
SEQF2708.1	GCA_000741775.1	Bifidobacterium	subtile	Bifidobacteriales	0	0	0	0	0	0	0	1	0	0	0	1	0	0	0	0	0
SEQF2709.1	GCA_000741825.1	Delftia	acidovorans	Burkholderiales	1	0	1	1	1	1	1	1	1	1	0	0	0	0	0	0	0
SEQF2711.1	GCA_000735365.1	Kluyvera	ascorbata	Enterobacterales	1	0	1	1	1	1	1	1	1	1	1	2	0	0	0	0	0
SEQF2712.1	GCA_000712915.1	Staphylococcus	warneri	Bacillales	0	1	1	1	1	1	1	1	1	1	1	1	0	0	1	0	0
SEQF2713.1	GCA_000712925.1	Staphylococcus	warneri	Bacillales	0	1	1	1	1	1	1	1	1	1	1	1	0	0	1	0	0
SEQF2714.1	GCA_000626735.1	Pseudomonas	oleovorans	Pseudomonadales	2	0	1	1	1	1	1	1	1	2	0	0	0	0	0	0	0
SEQF2715.1	GCA_000199675.1	Anaerolinea	thermophila	Anaerolineales	0	0	0	0	0	0	0	0	1	1	0	0	0	0	0	0	0
SEQF2716.2	GCA_000701165.2	Burkholderia	cepacia	Burkholderiales	1	1	0	1	1	1	1	1	1	1	1	1	0	0	0	0	0
SEQF2717.1	GCA_000281175.1	Caldilinea	aerophila	Caldilineales	0	0	0	0	0	0	0	1	1	1	0	2	0	0	0	0	0
SEQF2718.1	GCA_000020465.1	Chlorobium	limicola	Chlorobiales	1	0	0	0	1	1	0	1	2	1	0	0	0	0	0	0	0
SEQF2719.1	GCA_000258405.1	Ignavibacterium	album	Ignavibacteriales	2	0	0	0	1	1	0	1	1	1	0	0	0	0	0	0	0
SEQF2720.1	GCA_000279145.1	Melioribacter	roseus	Ignavibacteriales	1	0	1	1	1	1	0	1	1	1	0	0	0	0	0	0	0
SEQF2721.1	GCA_000392435.1	Candidatus	aalborgensis	Saccharibacteria	0	0	0	0	0	0	0	1	1	0	0	0	0	0	0	0	0
SEQF2722.1	GCA_000169295.1	Saccharibacteria	bacterium_HMT_987	Saccharibacteria	0	0	0	0	0	0	0	0	0	0	0	0	0	0	0	0	0
SEQF2723.2	GCA_000463895.2	Saccharibacteria	bacterium_HMT_986	Saccharibacteria	0	0	0	0	0	0	0	0	0	0	0	0	0	0	0	0	0
SEQF2724.1	GCA_000404725.1	Gracilibacteria	bacterium_HMT_996	Candidatus Gracilibacteria	0	0	0	0	0	0	0	0	0	0	0	0	0	0	0	0	0
SEQF2725.1	GCA_000404985.1	Gracilibacteria	bacterium_HMT_997	Candidatus Gracilibacteria	0	0	0	0	0	0	0	0	0	0	0	0	0	0	0	0	0
SEQF2726.1	GCA_000758945.1	Lancefieldella	parvula	Coriobacteriales	1	0	0	0	0	0	0	1	1	0	1	1	0	0	0	0	0
SEQF2728.1	GCA_000759045.1	Prevotella	bivia	Bacteroidales	1	0	0	1	1	1	1	1	2	1	0	0	0	0	0	0	0
SEQF2729.1	GCA_000759245.1	Prevotella	bivia	Bacteroidales	1	0	0	1	1	1	1	1	2	1	0	0	0	0	0	0	0
SEQF2730.1	GCA_000759165.1	Prevotella	bivia	Bacteroidales	1	0	0	1	1	1	1	1	2	1	0	0	0	0	0	0	0
SEQF2731.1	GCA_000759185.1	Prevotella	buccalis	Bacteroidales	1	0	0	1	1	1	1	1	2	1	0	0	0	0	0	0	0
SEQF2732.1	GCA_000759265.1	Prevotella	buccalis	Bacteroidales	1	0	0	1	1	1	1	1	2	1	0	0	0	0	0	0	0
SEQF2733.1	GCA_000759205.1	Prevotella	denticola	Bacteroidales	1	0	0	0	1	1	1	1	2	1	0	0	0	0	0	0	0
SEQF2734.1	GCA_000759305.1	Prevotella	melaninogenica	Bacteroidales	1	0	0	0	1	1	1	1	2	1	0	0	0	0	0	0	0
SEQF2736.1	CABL00000000.1	WPS-2	bacterium_HMT_999	WPS-2	0	0	0	0	0	0	0	0	0	0	0	0	0	0	0	0	0
SEQF2737.1	GCA_000503915.1	Saccharibacteria	bacterium_HMT_989	Saccharibacteria	0	0	0	0	0	0	0	0	0	0	0	0	0	0	0	0	0
SEQF2738.1	GCA_001006485.1	Tannerella	forsythia	Bacteroidales	1	0	0	0	1	1	1	1	2	0	1	0	0	0	0	0	0
SEQF2739.1	GCA_001262055.1	Schaalia	meyeri	Actinomycetales	1	0	0	0	0	0	0	1	0	0	0	0	0	0	0	0	0
SEQF2740.1	GCA_000739415.1	Porphyromonas	gingivalis	Bacteroidales	1	0	0	1	1	1	1	1	2	1	0	0	0	0	0	0	0
SEQF2741.1	GCA_001263815.1	Porphyromonas	gingivalis	Bacteroidales	1	0	0	1	1	1	1	1	2	1	0	0	0	0	0	0	0
SEQF2742.1	GCA_001274615.1	Porphyromonas	gingivalis	Bacteroidales	1	0	0	1	1	1	1	1	2	1	0	0	0	0	0	0	0
SEQF2743.1	GCA_001297745.1	Porphyromonas	gingivalis	Bacteroidales	1	0	0	1	1	1	1	1	2	1	0	0	0	0	0	0	0
SEQF2744.1	GCA_001189495.1	Peptostreptococcaceae	[Eubacterium]_sulci	Peptostreptococcales	0	0	0	0	0	0	0	1	1	0	1	0	0	0	0	1	0
SEQF2745.1	GCA_001278845.1	Actinomyces	sp._HMT_414	Actinomycetales	1	0	0	0	0	0	0	0	0	0	0	0	0	0	0	0	0
SEQF2746.1	GCA_001189535.1	Arsenicicoccus	bolidensis	Micrococcales	1	0	0	0	0	0	0	0	0	0	0	0	0	0	0	0	0
SEQF2747.1	GCA_001278825.1	Capnocytophaga	sp._HMT_323	Flavobacteriales	1	0	0	1	0	0	0	1	1	0	1	0	0	0	0	0	0
SEQF2748.1	GCA_001274535.1	Leptotrichia	sp._HMT_212	Fusobacteriales	0	0	0	0	0	0	0	1	1	0	0	2	0	0	0	0	0
SEQF2749.1	GCA_001262075.1	Ottowia	sp._HMT_894	Burkholderiales	1	0	0	0	1	1	1	1	1	1	0	0	0	0	0	0	0
SEQF2750.1	GCA_001262035.1	Aggregatibacter	paraphrophilus	Pasteurellales	1	0	0	1	2	1	1	1	1	0	1	0	0	0	0	0	0
SEQF2751.2	GCA_001189515.2	Olsenella	sp._HMT_807	Coriobacteriales	1	0	0	0	0	0	0	1	1	0	1	0	0	0	0	0	0
SEQF2752.1	GCA_001189555.1	Selenomonas	sp._HMT_478	Selenomonadales	1	1	1	0	1	1	1	1	1	0	1	0	0	0	0	0	0
SEQF2753.1	GCA_001262015.1	Prevotella	fusca	Bacteroidales	1	0	0	0	1	1	1	1	2	1	0	0	0	0	0	0	0
SEQF2757.1	GCA_000464455.1	Treponema	socranskii	Spirochaetales	0	1	1	0	0	0	0	1	1	0	1	1	0	0	1	0	0
SEQF2760.1	GCA_000185385.1	Lachnoanaerobaculum	saburreum	Lachnospirales	0	0	0	0	0	0	0	1	1	0	1	0	0	0	0	1	0
SEQF2761.1	GCA_000257705.1	Lachnoanaerobaculum	saburreum	Lachnospirales	0	0	0	0	0	0	0	1	1	0	1	0	0	0	0	1	0
SEQF2763.1	GCA_000384055.1	Mesorhizobium	japonicum	Hyphomicrobiales	0	0	0	0	0	0	0	0	0	0	0	0	0	0	0	0	0
SEQF2764.1	GCA_000472705.1	Mesorhizobium	japonicum	Hyphomicrobiales	0	0	0	0	0	0	0	0	0	0	0	0	0	0	0	0	0
SEQF2766.1	GCA_000767835.1	Streptococcus	sinensis	Lactobacillales	1	0	0	0	0	0	0	1	1	0	1	1	0	0	0	0	1
SEQF2767.2	GCA_000221165.2	Streptococcus	oralis	Lactobacillales	1	0	0	0	0	0	0	1	1	0	1	0	0	0	0	1	0
SEQF2771.1	GCA_000755145.1	Treponema	putidum	Spirochaetales	0	0	0	0	0	0	0	1	1	0	1	0	0	0	0	0	0
SEQF2774.1	GCA_000262265.1	Haemophilus	parahaemolyticus	Pasteurellales	1	0	0	1	1	1	1	1	1	0	1	0	0	0	0	0	0
SEQF2775.2	GCA_000223275.2	Haemophilus	pittmaniae	Pasteurellales	1	0	0	1	1	1	1	1	3	0	1	0	0	0	0	0	0
SEQF2776.1	GCA_000287615.1	Haemophilus	sputorum	Pasteurellales	1	0	0	1	1	1	1	1	1	0	1	0	0	0	0	0	0
SEQF2777.2	GCA_000238055.2	Oribacterium	parvum	Lachnospirales	0	0	0	0	0	0	0	1	1	0	1	1	0	0	0	1	0
SEQF2778.1	GCA_000973085.1	Sneathia	vaginalis	Fusobacteriales	0	0	0	0	0	0	0	1	1	0	1	1	0	0	1	0	0
SEQF2779.1	GCA_000019105.1	Mycoplasma	genitalium	Mycoplasmatales	0	0	0	0	0	0	0	0	0	0	0	0	0	0	0	0	0
SEQF2780.1	GCA_001438885.1	Lancefieldella	rimae	Coriobacteriales	1	0	0	0	0	0	0	1	1	0	1	1	0	0	0	1	0
SEQF2781.1	GCA_001553565.1	Actinomyces	radicidentis	Actinomycetales	1	0	0	0	0	0	0	0	0	0	0	1	0	0	0	0	0
SEQF2783.1	GCA_001553915.1	Gemella	sp._HMT_928	Bacillales	1	0	0	0	0	0	0	1	1	0	1	0	0	0	0	1	0
SEQF2784.1	GCA_000759055.1	Corynebacterium	tuscaniense	Mycobacteriales	1	0	0	0	0	0	0	1	0	0	0	2	0	0	0	0	0
SEQF2785.1	GCA_000956535.1	Microbacterium	ginsengisoli	Micrococcales	1	0	0	0	0	0	0	0	0	0	0	2	0	0	0	0	0
SEQF2786.1	GCA_001553685.1	Streptococcus	infantis	Lactobacillales	1	0	1	0	1	1	1	1	1	0	1	0	0	0	0	1	0
SEQF2787.1	GCA_000488855.1	Peptostreptococcaceae	[Eubacterium]_brachy	Peptostreptococcales	0	0	0	0	0	0	0	1	1	0	1	0	0	0	1	0	0
SEQF2788.1	GCA_001553545.1	Capnocytophaga	haemolytica	Flavobacteriales	1	0	0	1	0	0	0	1	1	0	1	0	0	0	0	0	0
SEQF2789.1	GCA_000510425.1	Peptostreptococcaceae	[Eubacterium]_nodatum	Peptostreptococcales	0	1	1	0	0	0	0	1	1	0	1	0	0	0	1	0	0
SEQF2790.1	GCA_001553645.1	Leptotrichia	sp._HMT_847	Fusobacteriales	0	0	0	0	0	0	0	0	1	0	1	0	0	1	0	0	0
SEQF2792.1	GCA_001444445.1	Prevotella	enoeca	Bacteroidales	1	0	0	0	0	0	0	1	2	1	0	0	0	0	0	0	0
SEQF2793.1	GCA_001553605.1	Desulfovibrio	fairfieldensis	Desulfovibrionales	0	1	1	0	1	1	0	1	1	0	1	0	0	0	0	0	0
SEQF2794.1	GCA_001553625.1	Desulfomicrobium	orale	Desulfovibrionales	0	2	1	0	0	0	0	1	1	0	1	0	0	0	0	0	0
SEQF2795.1	GCA_001553955.1	Moraxella	osloensis	Moraxellales	1	0	0	1	1	0	1	1	1	1	0	0	0	0	0	0	0
SEQF2796.1	GCA_000803625.1	Saccharibacteria	bacterium_HMT_952	Saccharibacteria	0	0	0	0	0	0	0	1	0	0	0	0	0	0	0	0	0
SEQF2797.1	GCA_001314265.1	Porphyromonas	gingivalis	Bacteroidales	1	0	0	1	1	1	1	1	2	1	0	0	0	0	0	0	0
SEQF2798.1	GCA_001444325.1	Porphyromonas	gingivalis	Bacteroidales	1	0	0	0	1	1	1	1	2	1	0	0	0	0	0	0	0
SEQF2799.1	GCA_001553795.1	Porphyromonas	gingivalis	Bacteroidales	1	0	0	1	1	1	1	1	2	1	0	0	0	0	0	0	0
SEQF2803.1	GCA_001431425.1	Stenotrophomonas	nitritireducens	Xanthomonadales	1	0	1	0	1	1	1	1	1	0	1	1	0	0	0	0	0
SEQF2804.1	GCA_001462375.1	Schaalia	odontolytica	Actinomycetales	1	0	0	0	0	0	0	1	0	0	0	0	0	0	0	0	0
SEQF2805.1	GCA_001683335.1	Selenomonas	sp._HMT_126	Selenomonadales	1	1	1	0	0	1	1	1	1	0	1	0	0	0	0	0	0
SEQF2806.1	GCA_001553935.1	Actinomyces	oris	Actinomycetales	1	0	0	0	0	0	0	0	0	0	0	0	0	0	0	0	0
SEQF2807.2	GCA_001717525.2	Tannerella	sp._HMT_286	Bacteroidales	1	0	0	0	1	1	1	0	2	0	1	1	0	0	0	0	0
SEQF2808.1	GCA_001717565.1	Cutibacterium	sp._HMT_193	Propionibacteriales	1	0	0	0	0	0	0	1	0	0	0	1	0	0	0	0	0
SEQF2809.1	GCA_001435935.1	Limosilactobacillus	panis	Lactobacillales	0	0	0	0	0	0	0	1	0	0	0	2	0	0	0	0	0
SEQF2810.1	GCA_001436255.1	Lentilactobacillus	rapi	Lactobacillales	1	0	0	0	0	0	0	1	1	1	0	3	0	0	0	1	0
SEQF2811.1	GCA_000517785.1	Veillonella	denticariosi	Veillonellales	2	0	1	0	1	1	1	1	1	1	0	0	0	0	0	0	0
SEQF2812.1	GCA_001455125.1	Fusobacterium	nucleatum	Fusobacteriales	1	0	0	0	0	0	0	1	1	0	1	0	0	1	0	0	0
SEQF2813.1	GCA_001457555.1	Fusobacterium	nucleatum	Fusobacteriales	1	0	0	0	0	0	0	1	1	0	1	0	0	1	0	0	0
SEQF2814.1	GCA_001433955.1	Fusobacterium	nucleatum	Fusobacteriales	1	0	0	0	0	0	0	1	1	0	1	0	0	1	0	0	0
SEQF2815.1	GCA_001296145.1	Fusobacterium	nucleatum	Fusobacteriales	1	0	0	0	0	0	0	1	1	0	1	0	0	1	0	0	0
SEQF2816.1	GCA_001296085.1	Fusobacterium	nucleatum	Fusobacteriales	1	0	0	0	0	0	0	1	1	0	1	0	0	1	0	0	0
SEQF2817.2	GCA_000158275.2	Fusobacterium	nucleatum	Fusobacteriales	1	0	0	0	0	0	0	1	1	0	1	0	0	1	0	0	0
SEQF2818.1	GCA_001296125.1	Fusobacterium	nucleatum	Fusobacteriales	1	0	0	0	0	0	0	1	1	0	1	0	0	1	0	0	0
SEQF2819.2	GCA_000163915.2	Fusobacterium	nucleatum	Fusobacteriales	1	0	0	0	0	0	0	1	1	0	1	0	0	1	0	0	0
SEQF2820.2	GCA_000162235.2	Fusobacterium	nucleatum	Fusobacteriales	1	0	0	0	0	0	0	1	1	0	1	0	0	1	0	0	0
SEQF2821.1	GCA_001296165.1	Fusobacterium	nucleatum	Fusobacteriales	1	0	0	0	0	0	0	1	1	0	1	0	0	1	0	0	0
SEQF2822.1	GCA_001296185.1	Fusobacterium	nucleatum	Fusobacteriales	1	0	0	0	0	0	0	1	1	0	1	0	0	1	0	0	0
SEQF2823.1	GCA_000259915.1	Aggregatibacter	actinomycetemcomitans	Pasteurellales	1	0	0	1	1	1	1	1	1	0	1	0	0	0	0	0	0
SEQF2824.1	GCA_001547775.1	Aggregatibacter	actinomycetemcomitans	Pasteurellales	1	0	0	1	1	1	1	1	1	0	1	0	0	0	0	0	0
SEQF2825.1	GCA_001596225.1	Aggregatibacter	actinomycetemcomitans	Pasteurellales	1	0	0	1	1	0	1	1	1	0	1	0	0	0	0	0	0
SEQF2826.1	GCA_001596235.1	Aggregatibacter	actinomycetemcomitans	Pasteurellales	1	0	0	1	1	1	1	1	1	0	1	0	0	0	0	0	0
SEQF2827.1	GCA_001596245.1	Aggregatibacter	actinomycetemcomitans	Pasteurellales	1	0	0	1	1	1	1	1	1	0	1	0	0	0	0	0	0
SEQF2828.1	GCA_001596255.1	Aggregatibacter	actinomycetemcomitans	Pasteurellales	1	0	0	0	1	1	1	1	1	0	1	0	0	0	0	0	0
SEQF2829.1	GCA_001596305.1	Aggregatibacter	actinomycetemcomitans	Pasteurellales	1	0	0	1	1	1	1	1	1	0	1	0	0	0	0	0	0
SEQF2830.1	GCA_001596315.1	Aggregatibacter	actinomycetemcomitans	Pasteurellales	1	0	0	1	1	1	1	1	1	0	1	0	0	0	0	0	0
SEQF2831.1	GCA_001596325.1	Aggregatibacter	actinomycetemcomitans	Pasteurellales	1	0	0	1	1	1	1	1	3	0	1	0	0	0	0	0	0
SEQF2832.2	GCA_001596335.2	Aggregatibacter	actinomycetemcomitans	Pasteurellales	1	0	0	1	1	1	1	1	1	0	1	0	0	0	0	0	0
SEQF2833.1	GCA_001596385.1	Aggregatibacter	actinomycetemcomitans	Pasteurellales	1	0	0	1	1	1	1	1	1	0	1	0	0	0	0	0	0
SEQF2834.1	GCA_001596395.1	Aggregatibacter	actinomycetemcomitans	Pasteurellales	1	0	0	1	1	0	1	1	1	0	1	0	0	0	0	0	0
SEQF2835.1	GCA_001596415.1	Aggregatibacter	actinomycetemcomitans	Pasteurellales	1	0	0	1	1	1	1	1	2	0	1	0	0	0	0	0	0
SEQF2836.1	GCA_001596425.1	Aggregatibacter	actinomycetemcomitans	Pasteurellales	1	0	0	1	1	0	1	1	1	0	1	0	0	0	0	0	0
SEQF2837.1	GCA_001690155.1	Aggregatibacter	actinomycetemcomitans	Pasteurellales	1	0	0	1	1	1	1	1	1	0	1	0	0	0	0	0	0
SEQF2838.1	GCA_001594245.1	Aggregatibacter	actinomycetemcomitans	Pasteurellales	1	0	0	1	1	1	1	1	1	0	1	0	0	0	0	0	0
SEQF2839.1	GCA_001594265.1	Aggregatibacter	actinomycetemcomitans	Pasteurellales	1	0	0	1	1	1	1	1	1	0	1	0	0	0	0	0	0
SEQF2840.1	GCA_001455085.1	Fusobacterium	hwasookii	Fusobacteriales	1	0	0	0	0	0	0	1	1	0	1	0	0	1	0	0	0
SEQF2841.1	GCA_001455105.1	Fusobacterium	hwasookii	Fusobacteriales	2	0	0	1	0	0	0	1	1	0	1	0	0	1	0	0	0
SEQF2842.1	GCA_001455145.1	Fusobacterium	hwasookii	Fusobacteriales	1	0	0	0	0	0	0	1	1	0	1	0	0	1	0	0	0
SEQF2843.1	GCA_000292935.1	Fusobacterium	hwasookii	Fusobacteriales	1	0	0	0	0	0	0	1	1	0	1	0	0	1	0	0	0
SEQF2845.1	GCA_001188545.1	Enhydrobacter	aerosaccus	Hyphomicrobiales	1	0	0	1	1	1	1	1	1	1	0	0	0	0	0	0	0
SEQF2846.1	GCA_000833575.1	Corynebacterium	singulare	Mycobacteriales	1	0	0	0	0	0	0	1	0	0	0	2	0	0	0	0	0
SEQF2847.1	GCA_000215745.1	Klebsiella	aerogenes	Enterobacterales	1	0	1	1	1	1	1	1	1	1	1	1	0	0	0	0	0
SEQF2848.1	GCA_000226315.1	Micavibrio	aeruginosavorus	Bdellovibrionales	0	0	0	0	0	0	0	1	0	0	0	0	1	0	0	0	0
SEQF2849.1	GCA_000494875.1	Staphylococcus	pasteuri	Bacillales	0	1	1	1	1	1	1	1	1	1	1	1	0	0	1	0	0
SEQF2850.1	GCA_002243705.1	Anoxybacillus	flavithermus	Bacillales	1	0	1	0	1	0	0	1	1	1	0	0	0	0	1	0	0
SEQF2851.1	GCA_001831515.1	Corynebacterium	gottingense	Mycobacteriales	1	0	0	0	0	0	0	1	0	0	0	3	0	0	0	0	0
SEQF2852.1	GCA_000159415.1	Lactobacillus	ultunensis	Lactobacillales	0	0	0	0	0	0	0	0	0	0	0	1	0	0	0	0	0
SEQF2853.1	GCA_002196905.1	Haematobacter	missouriensis	Rhodobacterales	0	1	0	0	0	0	0	1	1	1	0	2	0	0	0	0	0
SEQF2854.1	GCA_001281465.1	Cupriavidus	gilardii	Burkholderiales	1	1	0	1	1	1	1	1	1	1	0	0	0	0	0	0	0
SEQF2855.1	GCA_001717505.1	Dialister	pneumosintes	Veillonellales	1	0	1	1	1	1	1	1	1	0	1	0	0	0	0	1	0
SEQF2856.3	GCA_000175415.3	Arthrospira	platensis	Oscillatoriales	2	0	1	1	1	1	0	1	1	1	0	1	0	0	0	0	0
SEQF2857.1	GCA_002243385.1	Mogibacterium	pumilum	Peptostreptococcales	1	0	0	0	0	0	0	1	1	0	1	0	0	0	0	0	0
SEQF2859.1	GCA_002156805.1	Corynebacterium	striatum	Mycobacteriales	1	0	0	0	0	0	0	1	0	0	0	2	0	0	0	0	1
SEQF2860.1	GCA_001990205.1	Staphylococcus	cohnii	Bacillales	0	1	1	0	1	1	1	0	1	0	0	1	0	0	1	0	0
SEQF2861.1	GCA_001275345.1	Kocuria	palustris	Micrococcales	1	0	0	0	0	0	0	1	0	0	0	1	0	0	0	0	0
SEQF2862.1	GCA_000023145.1	Corynebacterium	kroppenstedtii	Mycobacteriales	1	0	0	0	0	0	0	1	0	0	0	1	0	0	0	0	0
SEQF2863.1	GCA_000022305.1	Acidovorax	ebreus	Burkholderiales	1	0	0	0	1	1	1	1	1	1	0	0	0	0	0	0	0
SEQF2864.1	GCA_000286595.1	Acinetobacter	radioresistens	Moraxellales	1	0	0	0	1	0	1	1	1	1	0	0	0	0	0	0	0
SEQF2866.1	GCA_001586215.1	Corynebacterium	simulans	Mycobacteriales	1	0	0	0	0	0	0	1	0	0	0	4	0	0	0	0	1
SEQF2867.2	GCA_002073635.2	Paracoccus	yeei	Rhodobacterales	0	1	0	0	0	0	0	1	1	1	0	1	0	0	0	0	0
SEQF2869.1	GCA_001679495.1	Haemophilus	sp._HMT_036	Pasteurellales	1	0	0	1	1	1	1	1	1	0	1	0	0	0	0	0	0
SEQF2870.1	GCA_002014765.1	Moraxella	lincolnii	Moraxellales	1	0	0	0	1	1	1	1	1	0	1	0	0	0	0	0	0
SEQF2871.2	GCA_002208685.2	Kocuria	rhizophila	Micrococcales	1	0	0	0	0	0	0	1	0	0	0	0	0	0	0	0	0
SEQF2875.1	GCA_001941805.1	Acinetobacter	junii	Moraxellales	1	0	0	0	1	0	1	1	1	1	0	0	0	0	0	0	0
SEQF2876.1	GCA_000220865.1	Neisseria	macacae	Neisseriales	0	1	0	1	1	1	1	1	1	0	1	0	0	0	0	0	0
SEQF2877.1	GCA_001281505.1	Lawsonella	clevelandensis	Mycobacteriales	1	0	0	0	0	0	0	1	0	0	0	0	0	0	0	0	0
SEQF2878.1	GCA_000805675.1	Corynebacterium	minutissimum	Mycobacteriales	1	0	0	0	0	0	0	1	0	0	0	1	0	0	0	0	0
SEQF2879.1	GCA_000740455.1	Moraxella	catarrhalis	Moraxellales	1	0	0	0	1	0	1	1	1	0	2	0	0	0	0	0	0
SEQF2880.1	GCA_001632305.1	Paenibacillus	glucanolyticus	Bacillales	1	0	1	1	2	1	1	1	1	1	0	0	0	0	0	0	0
SEQF2881.1	GCA_001028645.1	Staphylococcus	capitis	Bacillales	0	1	1	0	1	1	1	1	1	1	1	1	0	0	1	0	0
SEQF2882.1	GCA_000175635.1	Corynebacterium	tuberculostearicum	Mycobacteriales	1	0	0	0	0	0	0	1	0	0	0	3	0	0	0	0	1
SEQF2883.2	GCA_002083135.2	Aerococcus	viridans	Lactobacillales	1	0	0	0	0	0	0	1	1	0	0	3	0	0	0	1	0
SEQF2884.1	GCA_000487975.1	Acinetobacter	lwoffii	Moraxellales	1	0	0	1	1	1	1	1	1	1	1	0	0	0	0	0	0
SEQF2885.1	GCA_001889125.1	Janibacter	indicus	Micrococcales	1	0	0	0	0	0	0	0	0	0	0	0	0	0	0	0	0
SEQF2886.1	GCA_001639025.1	Corynebacterium	afermentans	Mycobacteriales	1	0	0	0	0	0	0	1	0	0	0	3	0	0	0	0	0
SEQF2887.1	GCA_000775415.1	Dermabacter	hominis	Micrococcales	1	0	0	0	0	0	0	1	0	0	0	0	0	0	0	0	0
SEQF2888.2	GCA_000183565.2	Peptoniphilus	harei	Tissierellales	1	0	0	0	0	0	0	1	1	0	1	1	0	1	0	0	1
SEQF2889.1	GCA_001280365.1	Serratia	marcescens	Enterobacterales	1	0	1	1	1	2	2	1	1	1	1	4	0	0	0	0	0
SEQF2890.2	GCA_000186325.2	Dietzia	cinnamea	Mycobacteriales	1	0	0	0	0	0	0	1	0	0	0	1	0	0	0	0	0
SEQF2891.1	GCA_000253395.1	Streptococcus	thermophilus	Lactobacillales	1	0	1	0	1	1	1	1	1	1	0	0	0	0	0	0	0
SEQF2892.1	GCA_001611955.1	Staphylococcus	haemolyticus	Bacillales	0	1	1	0	1	1	1	1	1	1	1	1	0	0	1	0	0
SEQF2893.1	GCA_000935585.1	Acidovorax	temperans	Burkholderiales	1	0	0	0	1	1	1	1	1	1	0	0	0	0	0	0	0
SEQF2894.2	GCA_001466485.2	Roseomonas	mucosa	Rhodospirillales	1	0	1	0	1	1	0	1	1	1	0	2	0	0	0	0	0
SEQF2895.2	GCA_002208805.2	Staphylococcus	pettenkoferi	Bacillales	0	1	1	0	1	1	1	1	1	1	1	1	0	0	1	0	0
SEQF2896.1	GCA_002243405.1	Fusobacterium	sp._HMT_203	Fusobacteriales	1	0	0	0	0	0	0	1	1	0	1	0	0	1	0	0	0
SEQF2897.1	GCA_000023205.1	Micrococcus	luteus	Micrococcales	1	0	0	0	0	0	0	1	0	0	0	1	0	0	0	0	0
SEQF2899.1	GCA_000173895.1	Neisseria	cinerea	Neisseriales	0	1	0	1	1	1	1	1	1	0	1	0	0	0	0	0	0
SEQF2900.1	GCA_001679155.1	Moraxella	nonliquefaciens	Moraxellales	1	0	0	1	1	0	1	1	1	0	1	0	0	0	0	0	0
SEQF2901.1	GCA_001051895.1	Staphylococcus	hominis	Bacillales	0	1	1	0	1	1	1	1	1	1	1	2	0	0	1	0	0
SEQF2902.1	GCA_000463665.1	Cutibacterium	granulosum	Propionibacteriales	1	0	0	0	0	0	0	1	0	0	0	0	0	0	0	0	0
SEQF2904.1	GCA_001715725.1	Brochothrix	thermosphacta	Bacillales	1	0	0	0	0	0	0	1	1	1	0	1	0	0	0	0	0
SEQF2905.1	GCA_001683375.1	Streptococcus	sp._HMT_064	Lactobacillales	1	0	1	0	1	1	1	1	1	0	1	0	0	0	0	0	0
SEQF2906.1	GCA_001856725.1	Haemophilus	influenzae	Pasteurellales	1	0	0	1	1	1	1	1	1	0	1	0	0	0	0	0	0
SEQF2907.1	GCA_001806995.1	Corynebacterium	coyleae	Mycobacteriales	1	0	0	0	0	0	0	1	0	0	0	3	0	0	0	0	0
SEQF2908.1	GCA_001941945.1	Roseomonas	gilardii	Rhodospirillales	1	0	1	1	1	1	0	0	1	1	0	2	0	0	0	0	0
SEQF2909.2	GCA_001558815.2	Staphylococcus	lugdunensis	Bacillales	0	1	1	0	1	1	1	1	1	1	1	1	0	0	1	0	0
SEQF2910.1	GCA_000755185.1	Corynebacterium	amycolatum	Mycobacteriales	1	0	0	0	0	0	0	1	0	0	0	1	0	0	0	0	0
SEQF2911.1	GCA_000477935.1	Corynebacterium	pseudodiphtheriticum	Mycobacteriales	1	0	0	0	0	0	0	1	0	0	0	1	0	0	0	0	0
SEQF2912.1	GCA_001815985.1	Corynebacterium	urealyticum	Mycobacteriales	1	0	0	0	0	0	0	1	0	0	0	2	0	0	0	0	1
SEQF2913.1	GCA_001543085.1	Streptococcus	salivarius	Lactobacillales	1	0	1	0	1	1	1	1	1	1	0	0	0	0	0	1	0
SEQF2914.1	GCA_001548255.1	Staphylococcus	schleiferi	Bacillales	0	1	1	1	1	1	1	1	1	1	1	1	0	0	1	0	0
SEQF2915.1	GCA_900156665.1	Corynebacterium	appendicis	Mycobacteriales	1	0	0	0	0	0	0	1	0	0	0	2	0	0	0	0	0
SEQF2916.1	GCA_001484935.1	Acinetobacter	johnsonii	Moraxellales	1	0	0	1	1	1	1	1	1	1	1	0	0	0	0	0	0
SEQF2917.1	GCA_000512995.1	Lachnoanaerobaculum	sp._HMT_083	Lachnospirales	0	0	0	0	0	0	0	1	1	0	1	0	0	0	0	1	0
SEQF2918.1	GCA_000260675.1	Haemophilus	paraphrohaemolyticus	Pasteurellales	1	0	0	1	1	1	1	1	1	0	1	0	0	0	0	0	0
SEQF2919.1	GCA_001717585.1	Selenomonas	sp._HMT_920	Selenomonadales	1	1	1	0	1	1	1	1	1	0	1	0	0	0	0	0	0
SEQF2920.1	GCA_002240055.1	Leptotrichia	sp._HMT_498	Fusobacteriales	0	0	0	0	0	0	0	0	1	0	1	0	0	1	0	0	1
SEQF2921.1	GCA_001717545.1	Anaerolineae	bacterium_HMT_439	Anaerolineae	0	0	0	0	0	0	0	1	1	1	0	3	0	0	0	0	1
SEQF2922.1	GCA_001683355.1	Prevotella	scopos	Bacteroidales	1	0	0	0	1	1	1	1	2	1	0	0	0	0	0	0	0
SEQF2935.1	GCA_000478075.1	Corynebacterium	accolens	Mycobacteriales	1	0	0	0	0	0	0	1	0	0	0	3	0	0	0	0	0
SEQF2936.1	GCA_001814945.1	Corynebacterium	aurimucosum	Mycobacteriales	1	0	0	0	0	0	0	1	0	0	0	0	0	0	0	0	0
SEQF2937.1	GCA_000477975.1	Corynebacterium	accolens	Mycobacteriales	1	0	0	0	0	0	0	1	0	0	0	3	0	0	0	0	0
SEQF2938.1	GCA_001836165.1	Corynebacterium	aurimucosum	Mycobacteriales	1	0	0	0	0	0	0	1	0	0	0	1	0	0	0	0	0
SEQF2939.1	GCA_001811565.1	Corynebacterium	aurimucosum	Mycobacteriales	1	0	0	0	0	0	0	1	0	0	0	1	0	0	0	0	0
SEQF2940.1	GCA_000478015.1	Corynebacterium	accolens	Mycobacteriales	1	0	0	0	0	0	0	1	0	0	0	3	0	0	0	0	0
SEQF2941.1	GCA_001679485.1	Haemophilus	parainfluenzae	Pasteurellales	1	0	0	0	1	1	1	1	1	0	1	0	0	0	0	0	0
SEQF2942.1	GCA_001811805.1	Corynebacterium	amycolatum	Mycobacteriales	1	0	0	0	0	0	0	1	0	0	0	1	0	0	0	0	0
SEQF2943.1	GCA_000478115.1	Corynebacterium	tuberculostearicum	Mycobacteriales	1	0	0	0	0	0	0	1	0	0	0	3	0	0	0	0	1
SEQF2944.1	GCA_001813925.1	Corynebacterium	aurimucosum	Mycobacteriales	1	0	0	0	0	0	0	1	0	0	0	1	0	0	0	0	0
SEQF2945.1	GCA_001835905.1	Corynebacterium	coyleae	Mycobacteriales	1	0	0	0	0	0	0	1	0	0	0	3	0	0	0	0	0
SEQF2946.1	GCA_001809255.1	Moraxella	catarrhalis	Moraxellales	1	0	0	0	1	0	1	1	1	0	0	0	0	0	0	0	0
SEQF2948.1	GCA_001810695.1	Corynebacterium	aurimucosum	Mycobacteriales	1	0	0	0	0	0	0	1	0	0	0	1	0	0	0	0	0
SEQF2949.1	GCA_001814235.1	Corynebacterium	amycolatum	Mycobacteriales	1	0	0	0	0	0	0	1	0	0	0	1	0	0	0	0	0
SEQF2950.1	GCA_001808885.1	Corynebacterium	aurimucosum	Mycobacteriales	1	0	0	0	0	0	0	1	0	0	0	1	0	0	0	0	0
SEQF2951.1	GCA_001810585.1	Corynebacterium	amycolatum	Mycobacteriales	1	0	0	0	0	0	0	1	0	0	0	1	0	0	0	0	0
SEQF2952.1	GCA_001807495.1	Corynebacterium	simulans	Mycobacteriales	1	0	0	0	0	0	0	1	0	0	0	4	0	0	0	0	0
SEQF2953.1	GCA_000477875.1	Corynebacterium	accolens	Mycobacteriales	1	0	0	0	0	0	0	1	0	0	0	3	0	0	0	0	0
SEQF2954.1	GCA_000478095.1	Corynebacterium	accolens	Mycobacteriales	1	0	0	0	0	0	0	1	0	0	0	3	0	0	0	0	0
SEQF2955.1	GCA_001807315.1	Corynebacterium	simulans	Mycobacteriales	1	0	0	0	0	0	0	1	0	0	0	3	0	0	0	0	0
SEQF2956.1	GCA_001807075.1	Corynebacterium	amycolatum	Mycobacteriales	1	0	0	0	0	0	0	1	0	0	0	1	0	0	0	0	0
SEQF2957.1	GCA_001807545.1	Corynebacterium	coyleae	Mycobacteriales	1	0	0	0	0	0	0	1	0	0	0	3	0	0	0	0	0
SEQF2959.1	GCA_001813745.1	Fusobacterium	nucleatum	Fusobacteriales	1	0	0	0	0	0	0	1	1	0	1	0	0	1	0	0	0
SEQF2960.1	GCA_001553125.1	Peptoniphilus	harei	Tissierellales	1	0	0	0	0	0	0	1	1	0	1	1	0	1	0	0	1
SEQF2961.1	GCA_001836185.1	Corynebacterium	simulans	Mycobacteriales	1	0	0	0	0	0	0	1	0	0	0	4	0	0	0	0	0
SEQF2962.1	GCA_001807155.1	Corynebacterium	coyleae	Mycobacteriales	1	0	0	0	0	0	0	1	0	0	0	3	0	0	0	0	0
SEQF2963.1	GCA_001811425.1	Peptoniphilus	sp._HMT_187	Tissierellales	1	0	0	0	0	0	0	1	1	0	1	1	0	1	0	0	1
SEQF2964.1	GCA_001810555.1	Corynebacterium	amycolatum	Mycobacteriales	1	0	0	0	0	0	0	1	0	0	0	1	0	0	0	0	0
SEQF2965.1	GCA_001811665.1	Haemophilus	influenzae	Pasteurellales	1	0	0	1	1	1	1	1	1	0	1	0	0	0	0	0	0
SEQF2966.1	GCA_001810345.1	Haemophilus	parainfluenzae	Pasteurellales	1	0	0	0	1	1	1	1	1	0	1	0	0	0	0	0	0
SEQF2967.1	GCA_001815745.1	Corynebacterium	amycolatum	Mycobacteriales	1	0	0	0	0	0	0	1	0	0	0	1	0	0	0	0	0
SEQF2968.1	GCA_001835805.1	Corynebacterium	coyleae	Mycobacteriales	1	0	0	0	0	0	0	1	0	0	0	3	0	0	0	0	0
SEQF2969.1	GCA_001807265.1	Corynebacterium	pilbarense	Mycobacteriales	1	0	0	0	0	0	0	1	0	0	0	3	0	0	0	0	0
SEQF2970.1	GCA_001815965.1	Corynebacterium	urealyticum	Mycobacteriales	1	0	0	0	0	0	0	1	0	0	0	2	0	0	0	0	1
SEQF2971.1	GCA_001808895.1	Corynebacterium	aurimucosum	Mycobacteriales	1	0	0	0	0	0	0	1	0	0	0	2	0	0	0	0	0
SEQF2972.1	GCA_000477955.1	Corynebacterium	pseudodiphtheriticum	Mycobacteriales	1	0	0	0	0	0	0	1	0	0	0	1	0	0	0	0	0
SEQF2973.1	GCA_000524215.1	Fusobacterium	nucleatum	Fusobacteriales	1	0	0	0	0	0	0	1	1	0	1	0	0	1	0	0	0
SEQF2974.1	GCA_001815355.1	Haemophilus	parainfluenzae	Pasteurellales	1	0	0	0	1	1	1	1	1	0	1	0	0	0	0	0	0
SEQF2975.1	GCA_001809695.1	Corynebacterium	amycolatum	Mycobacteriales	1	0	0	0	0	0	0	1	0	0	0	1	0	0	0	0	0
SEQF2976.1	GCA_001814055.1	Haemophilus	parainfluenzae	Pasteurellales	1	0	0	0	1	1	1	1	1	0	1	0	0	0	0	0	0
SEQF2977.1	GCA_000478055.1	Corynebacterium	tuberculostearicum	Mycobacteriales	1	0	0	0	0	0	0	1	0	0	0	3	0	0	0	0	1
SEQF2978.1	GCA_001807485.1	Corynebacterium	jeikeium	Mycobacteriales	1	0	0	0	0	0	0	1	0	0	0	2	0	0	0	0	1
SEQF2979.1	GCA_001812505.1	Corynebacterium	amycolatum	Mycobacteriales	1	0	0	0	0	0	0	1	0	0	0	1	0	0	0	0	0
SEQF2980.1	GCA_001810995.1	Fusobacterium	nucleatum	Fusobacteriales	1	0	0	0	0	0	0	1	1	0	1	0	0	1	0	0	0
SEQF2981.1	GCA_001811145.1	Corynebacterium	aurimucosum	Mycobacteriales	1	0	0	0	0	0	0	1	0	0	0	1	0	0	0	0	0
SEQF2982.1	GCA_001811025.1	Haemophilus	parainfluenzae	Pasteurellales	1	0	0	0	1	1	1	1	1	0	1	0	0	0	0	0	0
SEQF2983.1	GCA_001810545.1	Haemophilus	parainfluenzae	Pasteurellales	1	0	0	0	1	1	1	1	1	0	1	0	0	0	0	0	0
SEQF2985.1	GCA_000524395.1	Fusobacterium	sp._HMT_203	Fusobacteriales	1	0	0	0	0	0	0	1	1	0	1	0	0	1	0	0	0
SEQF2986.1	GCA_000478135.1	Corynebacterium	accolens	Mycobacteriales	1	0	0	0	0	0	0	1	0	0	0	3	0	0	0	0	0
SEQF2987.1	GCA_002154655.1	Corynebacterium	tuberculostearicum	Mycobacteriales	1	0	0	0	0	0	0	1	1	0	0	3	0	0	0	0	1
SEQF2988.1	GCA_000478175.1	Corynebacterium	accolens	Mycobacteriales	1	0	0	0	0	0	0	1	0	0	0	3	0	0	0	0	0
SEQF2989.1	GCA_001813755.1	Corynebacterium	aurimucosum	Mycobacteriales	1	0	0	0	0	0	0	1	0	0	0	2	0	0	0	0	0
SEQF2991.1	GCA_001813425.1	Corynebacterium	aurimucosum	Mycobacteriales	1	0	0	0	0	0	0	1	0	0	0	1	0	0	0	0	0
SEQF2992.1	GCA_001811205.1	Corynebacterium	amycolatum	Mycobacteriales	1	0	0	0	0	0	0	1	0	0	0	1	0	0	0	0	0
SEQF2993.1	GCA_000477995.1	Corynebacterium	tuberculostearicum	Mycobacteriales	1	0	0	0	0	0	0	1	0	0	0	3	0	0	0	0	1
SEQF2994.1	GCA_000478035.1	Corynebacterium	tuberculostearicum	Mycobacteriales	1	0	0	0	0	0	0	1	0	0	0	3	0	0	0	0	1
SEQF2995.1	GCA_001838325.1	Corynebacterium	amycolatum	Mycobacteriales	1	0	0	0	0	0	0	1	0	0	0	1	0	0	0	0	0
SEQF2996.1	GCA_001838295.1	Corynebacterium	amycolatum	Mycobacteriales	1	0	0	0	0	0	0	1	0	0	0	0	0	0	0	0	0
SEQF2997.1	GCA_001276515.1	Haemophilus	haemolyticus	Pasteurellales	1	0	0	0	0	1	1	1	1	0	1	0	0	0	0	0	0
SEQF2998.1	GCA_001838175.1	Corynebacterium	pilbarense	Mycobacteriales	1	0	0	0	0	0	0	1	0	0	0	3	0	0	0	0	0
SEQF2999.1	GCA_001807295.1	Corynebacterium	striatum	Mycobacteriales	1	0	0	0	0	0	0	1	0	0	0	2	0	0	0	0	1
SEQF3001.1	GCA_001814605.1	Corynebacterium	aurimucosum	Mycobacteriales	1	0	0	0	0	0	0	1	0	0	0	1	0	0	0	0	0
SEQF3002.1	GCA_001808545.1	Corynebacterium	simulans	Mycobacteriales	1	0	0	0	0	0	0	1	0	0	0	4	0	0	0	0	0
SEQF3003.1	GCA_001810365.1	Corynebacterium	coyleae	Mycobacteriales	1	0	0	0	0	0	0	1	0	0	0	3	0	0	0	0	0
SEQF3004.1	GCA_001837615.1	Corynebacterium	coyleae	Mycobacteriales	1	0	0	0	0	0	0	1	0	0	0	3	0	0	0	0	0
SEQF3005.1	GCA_001810285.1	Corynebacterium	simulans	Mycobacteriales	1	0	0	0	0	0	0	1	0	0	0	4	0	0	0	0	0
SEQF3006.1	GCA_001807045.1	Corynebacterium	amycolatum	Mycobacteriales	1	0	0	0	0	0	0	1	0	0	0	1	0	0	0	0	0
SEQF3007.1	GCA_001836265.1	Corynebacterium	coyleae	Mycobacteriales	1	0	0	0	0	0	0	1	0	0	0	3	0	0	0	0	0
SEQF3008.1	GCA_001811185.1	Corynebacterium	coyleae	Mycobacteriales	1	0	0	0	0	0	0	1	0	0	0	3	0	0	0	0	0
SEQF3009.1	GCA_001807205.1	Corynebacterium	aurimucosum	Mycobacteriales	1	0	0	0	0	0	0	1	0	0	0	1	0	0	0	0	0
SEQF3010.1	GCA_001814525.1	Corynebacterium	aurimucosum	Mycobacteriales	1	0	0	0	0	0	0	1	0	0	0	1	0	0	0	0	0
SEQF3011.1	GCA_001838615.1	Haemophilus	parainfluenzae	Pasteurellales	1	0	0	1	1	1	1	1	1	0	1	0	0	0	0	0	0
SEQF3012.1	GCA_000411235.1	Corynebacterium	amycolatum	Mycobacteriales	1	0	0	0	0	0	0	1	0	0	0	1	0	0	0	0	0
SEQF3013.1	GCA_001837705.1	Corynebacterium	amycolatum	Mycobacteriales	1	0	0	0	0	0	0	1	0	0	0	1	0	0	0	0	0
SEQF3014.1	GCA_001838205.1	Corynebacterium	amycolatum	Mycobacteriales	1	0	0	0	0	0	0	1	0	0	0	1	0	0	0	0	0
SEQF3015.1	GCA_001809065.1	Corynebacterium	amycolatum	Mycobacteriales	1	0	0	0	0	0	0	1	0	0	0	1	0	0	0	0	0
SEQF3016.1	GCA_001837655.1	Haemophilus	influenzae	Pasteurellales	1	0	0	1	1	1	1	1	1	0	1	0	0	0	0	0	0
SEQF3017.1	GCA_001809455.1	Corynebacterium	amycolatum	Mycobacteriales	1	0	0	0	0	0	0	1	0	0	0	1	0	0	0	0	0
SEQF3018.1	GCA_001815715.1	Fusobacterium	nucleatum	Fusobacteriales	1	0	0	0	0	0	0	1	1	0	1	0	0	1	0	0	0
SEQF3019.1	GCA_001809405.1	Corynebacterium	aurimucosum	Mycobacteriales	1	0	0	0	0	0	0	1	0	0	0	1	0	0	0	0	0
SEQF3020.1	GCA_001812845.1	Corynebacterium	amycolatum	Mycobacteriales	1	0	0	0	0	0	0	1	0	0	0	1	0	0	0	0	0
SEQF3022.1	GCA_001838635.1	Haemophilus	parainfluenzae	Pasteurellales	1	0	0	0	1	1	1	1	1	0	1	0	0	0	0	0	0
SEQF3023.1	GCA_001809885.1	Corynebacterium	jeikeium	Mycobacteriales	1	0	0	0	0	0	0	1	0	0	0	2	0	0	0	0	1
SEQF3024.1	GCA_001809925.1	Corynebacterium	amycolatum	Mycobacteriales	1	0	0	0	0	0	0	1	0	0	0	1	0	0	0	0	0
SEQF3025.1	GCA_000524235.1	Fusobacterium	nucleatum	Fusobacteriales	1	0	0	0	0	0	0	1	1	0	1	0	0	1	0	0	0
SEQF3026.1	GCA_000477895.1	Corynebacterium	accolens	Mycobacteriales	1	0	0	0	0	0	0	1	0	0	0	3	0	0	0	0	0
SEQF3027.1	GCA_000477915.1	Corynebacterium	accolens	Mycobacteriales	1	0	0	0	0	0	0	1	0	0	0	3	0	0	0	0	0
SEQF3028.1	GCA_001838215.1	Corynebacterium	amycolatum	Mycobacteriales	1	0	0	0	0	0	0	1	0	0	0	1	0	0	0	0	0
SEQF3029.1	GCA_001807365.1	Corynebacterium	simulans	Mycobacteriales	1	0	0	0	0	0	0	1	0	0	0	3	0	0	0	0	0
SEQF3030.1	GCA_000478155.1	Corynebacterium	tuberculostearicum	Mycobacteriales	1	0	0	0	0	0	0	1	0	0	0	3	0	0	0	0	1
SEQF3031.1	GCA_001809225.1	Corynebacterium	amycolatum	Mycobacteriales	1	0	0	0	0	0	0	1	0	0	0	1	0	0	0	0	0
SEQF3032.1	GCA_001814885.1	Corynebacterium	aurimucosum	Mycobacteriales	1	0	0	0	0	0	0	1	0	0	0	2	0	0	0	0	0
SEQF3033.1	GCA_001837775.1	Corynebacterium	amycolatum	Mycobacteriales	1	0	0	0	0	0	0	1	0	0	0	1	0	0	0	0	0
SEQF3034.1	GCA_001810195.1	Corynebacterium	amycolatum	Mycobacteriales	1	0	0	0	0	0	0	1	0	0	0	1	0	0	0	0	0
SEQF3035.1	GCA_001815405.1	Peptoniphilus	harei	Tissierellales	1	0	0	0	0	0	0	1	1	0	1	1	0	1	0	0	1
SEQF3036.1	GCA_001813815.1	Corynebacterium	simulans	Mycobacteriales	1	0	0	0	0	0	0	1	0	0	0	4	0	0	0	0	0
SEQF3037.1	GCA_001807105.1	Corynebacterium	amycolatum	Mycobacteriales	1	0	0	0	0	0	0	1	0	0	0	1	0	0	0	0	0
SEQF3038.1	GCA_001815635.1	Corynebacterium	coyleae	Mycobacteriales	1	0	0	0	0	0	0	1	0	0	0	3	0	0	0	0	0
SEQF3039.1	GCA_001812805.1	Corynebacterium	singulare	Mycobacteriales	1	0	0	0	0	0	0	1	0	0	0	1	0	0	0	0	0
SEQF3040.1	GCA_001814825.1	Corynebacterium	gottingense	Mycobacteriales	1	0	0	0	0	0	0	1	0	0	0	3	0	0	0	0	0
SEQF3041.1	GCA_001665955.1	Corynebacterium	pseudodiphtheriticum	Mycobacteriales	1	0	0	0	0	0	0	1	0	0	0	1	0	0	0	0	0
SEQF3042.1	GCA_001810085.1	Corynebacterium	aurimucosum	Mycobacteriales	1	0	0	0	0	0	0	1	0	0	0	1	0	0	0	0	0
SEQF3043.1	GCA_001813175.1	Corynebacterium	aurimucosum	Mycobacteriales	1	0	0	0	0	0	0	1	0	0	0	1	0	0	0	0	0
SEQF3044.1	GCA_001807215.1	Corynebacterium	striatum	Mycobacteriales	1	0	0	0	0	0	0	1	0	0	0	2	0	0	0	0	0
SEQF3045.1	GCA_001836065.1	Corynebacterium	aurimucosum	Mycobacteriales	1	0	0	0	0	0	0	1	0	0	0	2	0	0	0	0	0
SEQF3046.1	GCA_001809235.1	Corynebacterium	aurimucosum	Mycobacteriales	1	0	0	0	0	0	0	1	0	0	0	2	0	0	0	0	0
SEQF3047.1	GCA_001807225.1	Corynebacterium	minutissimum	Mycobacteriales	1	0	0	0	0	0	0	1	0	0	0	2	0	0	0	0	0
SEQF3048.1	GCA_001815785.1	Corynebacterium	aurimucosum	Mycobacteriales	1	0	0	0	0	0	0	1	0	0	0	2	0	0	0	0	0
SEQF3049.1	GCA_002285155.1	Corynebacterium	gottingense	Mycobacteriales	1	0	0	0	0	0	0	1	0	0	0	3	0	0	0	0	0
SEQF3050.1	GCA_002285085.1	Corynebacterium	gottingense	Mycobacteriales	1	0	0	0	0	0	0	1	0	0	0	3	0	0	0	0	0
SEQF3051.1	GCA_002998435.1	Bacteroides	zoogleoformans	Bacteroidales	1	0	0	0	0	1	1	1	2	0	1	0	0	0	0	0	0
SEQF3052.1	GCA_003433295.1	Peptostreptococcaceae	[Eubacterium]_minutum	Peptostreptococcales	0	1	1	0	0	0	0	1	1	0	1	0	0	0	0	0	0
SEQF3053.1	GCA_002998925.1	Mogibacterium	diversum	Peptostreptococcales	1	0	0	0	0	0	0	1	1	0	1	0	0	0	0	0	0
SEQF3054.1	GCA_002998295.1	Fastidiosipila	sanguinis	Eubacteriales	0	0	0	0	0	0	0	1	1	0	0	1	0	0	0	1	0
SEQF3055.1	GCA_003043945.1	Prevotella	sp._HMT_376	Bacteroidales	1	0	0	0	1	1	1	1	2	0	1	0	0	0	0	0	0
SEQF3056.1	GCA_002998535.1	Bacteroides	heparinolyticus	Bacteroidales	1	0	0	0	0	1	1	1	2	0	1	0	0	0	0	0	0
SEQF3057.1	GCA_003043955.1	Lachnospiraceae	bacterium_HMT_096	Lachnospirales	1	0	0	0	1	1	1	1	1	0	1	0	0	0	0	0	1
SEQF3058.1	GCA_002998835.1	Capnocytophaga	sp._HMT_864	Flavobacteriales	1	0	0	1	0	0	0	1	1	0	1	0	0	0	0	0	0
SEQF3059.1	GCA_002999135.1	Capnocytophaga	sp._HMT_878	Flavobacteriales	1	0	0	1	0	0	0	1	1	0	1	0	0	0	0	0	0
SEQF3060.1	GCA_001554015.1	Selenomonas	sp._HMT_136	Selenomonadales	1	1	1	0	1	1	1	1	1	0	1	0	0	0	0	0	0
SEQF3061.1	GCA_002998595.1	Haemophilus	sp._HMT_036	Pasteurellales	1	0	0	1	1	1	1	1	1	0	1	0	0	0	0	0	0
SEQF3062.1	GCA_002999235.1	Actinomyces	sp._HMT_897	Actinomycetales	1	0	0	0	0	0	0	0	0	0	0	0	0	0	0	0	0
SEQF3063.1	GCA_003043935.1	Prevotella	jejuni	Bacteroidales	1	0	0	0	1	1	1	1	2	1	0	0	0	0	0	0	0
SEQF3065.1	GCA_003033945.1	Paenibacillus	glucanolyticus	Bacillales	1	0	1	1	2	1	1	1	1	1	0	0	0	0	0	0	0
SEQF3066.1	GCA_002999035.1	Lachnospiraceae	bacterium_HMT_500	Lachnospirales	0	0	0	0	0	0	0	1	1	0	1	3	0	0	0	0	1
SEQF3068.1	GCA_003033925.1	Tannerella	sp._HMT_286	Bacteroidales	1	0	0	0	1	1	1	0	2	0	1	1	0	0	0	0	0
SEQF3070.1	GCA_002998695.1	Peptoniphilaceae	bacterium_HMT_929	Tissierellales	0	0	0	0	0	0	0	1	1	1	0	0	0	0	0	1	0
SEQF3071.1	GCA_002999155.1	Dietzia	cinnamea	Mycobacteriales	1	0	0	0	0	0	0	1	0	0	0	1	0	0	0	0	0
SEQF3072.1	GCA_003043925.1	Prevotella	sp._HMT_820	Bacteroidales	1	0	0	0	1	1	1	1	2	1	0	0	0	0	0	0	0
SEQF3073.1	GCA_900116825.1	Acidovorax	caeni	Burkholderiales	1	0	0	0	1	1	1	1	1	1	0	0	0	0	0	0	0
SEQF3074.1	GCA_000467895.1	Prevotella	sp._HMT_314	Bacteroidales	1	0	0	0	1	1	1	1	2	1	0	0	0	0	0	0	0
SEQF3076.1	GCA_003936815.1	Pseudomonas	luteola	Pseudomonadales	1	0	1	1	1	1	1	1	1	1	0	2	0	0	0	0	0
SEQF3077.1	GCA_002847685.1	Dermabacter	hominis	Micrococcales	1	0	0	0	0	0	0	1	0	0	0	0	0	0	0	0	0
SEQF3078.1	GCA_000959885.1	Streptococcus	cristatus	Lactobacillales	1	0	0	0	0	0	0	1	1	1	0	1	0	0	0	1	1
SEQF3079.1	GCA_000241465.1	Sphingomonas	glacialis	Sphingomonadales	0	0	0	0	0	0	0	0	0	0	0	0	0	0	0	0	0
SEQF3080.1	GCA_002155695.1	Erythrobacter	tepidarius	Sphingomonadales	0	0	0	0	0	0	0	0	0	0	0	0	0	0	0	0	0
SEQF3081.1	GCA_000375525.1	Corynebacterium	propinquum	Mycobacteriales	0	0	0	0	0	0	0	0	0	0	0	0	0	0	0	0	0
SEQF3082.2	GCA_000183325.2	Corynebacterium	bovis	Mycobacteriales	0	0	0	0	0	0	0	0	0	0	0	0	0	0	0	0	0
SEQF3083.1	GCA_000375365.1	Corynebacterium	mastitidis	Mycobacteriales	0	0	0	0	0	0	0	0	0	0	0	0	0	0	0	0	0
SEQF3084.1	GCA_001500315.1	Staphylococcus	auricularis	Bacillales	0	0	0	0	0	0	0	0	0	0	0	0	0	0	0	0	0
SEQF3085.1	GCA_000420605.1	Corynebacterium	massiliense	Mycobacteriales	0	0	0	0	0	0	0	0	0	0	0	0	0	0	0	0	0
SEQF3086.1	GCA_002149965.1	Novosphingobium	panipatense	Sphingomonadales	0	0	0	0	0	0	0	0	0	0	0	0	0	0	0	0	0
SEQF3087.1	GCA_001517935.1	Sneathia	sanguinegens	Fusobacteriales	0	0	0	0	0	0	0	0	0	0	0	0	0	0	0	0	0
SEQF3088.1	GCA_000788295.1	Campylobacter	sputorum	Campylobacterales	0	0	0	0	0	0	0	0	0	0	0	0	0	0	0	0	0
SEQF3089.1	GCA_001556165.1	Neisseria	perflava	Neisseriales	0	0	0	0	0	0	0	0	0	0	0	0	0	0	0	0	0
SEQF3090.1	GCA_000614025.1	Prevotella	aurantiaca	Bacteroidales	0	0	0	0	0	0	0	0	0	0	0	0	0	0	0	0	0
SEQF3091.1	GCA_001069775.1	Streptococcus	cristatus	Lactobacillales	0	0	0	0	0	0	0	0	0	0	0	0	0	0	0	0	0
SEQF3092.1	GCA_001069055.1	Streptococcus	cristatus	Lactobacillales	0	0	0	0	0	0	0	0	0	0	0	0	0	0	0	0	0
SEQF3093.1	GCA_001069915.1	Streptococcus	cristatus	Lactobacillales	0	0	0	0	0	0	0	0	0	0	0	0	0	0	0	0	0
SEQF3095.1	GCA_005696555.1	Actinomyces	sp._HMT_171	Actinomycetales	1	0	0	0	0	0	0	0	0	0	0	0	0	0	0	0	0
SEQF3096.1	GCA_005696695.1	Schaalia	odontolytica	Actinomycetales	1	0	0	0	0	0	0	1	0	0	0	0	0	0	0	0	0
SEQF3097.1	GCA_005696855.1	Arachnia	propionica	Propionibacteriales	1	0	0	0	0	0	0	1	0	0	0	0	0	0	0	0	0
SEQF3098.1	GCA_005697215.1	Saccharibacteria	bacterium_HMT_488	Saccharibacteria	0	0	0	0	0	0	0	1	0	0	0	0	0	0	0	0	0
SEQF3099.1	GCA_005697055.1	Saccharibacteria	bacterium_HMT_955	Saccharibacteria	0	0	0	0	0	0	0	1	1	0	0	0	0	0	0	0	0
SEQF3100.1	GCA_005697565.1	Saccharibacteria	bacterium_HMT_957	Saccharibacteria	0	0	0	0	0	0	0	0	0	0	0	0	0	0	0	0	0
SEQF3101.1	GCA_005697395.1	Saccharibacteria	bacterium_HMT_952	Saccharibacteria	0	0	0	0	0	0	0	1	0	0	0	0	0	0	0	0	0
SEQF3102.1	GCA_001639275.1	Methanobrevibacter	oralis	Methanobacteriales	0	1	0	0	1	0	0	1	0	0	0	0	0	0	0	0	0
SEQF3103.1	GCA_900289035.1	Methanobrevibacter	oralis	Methanobacteriales	0	0	0	0	0	0	0	0	0	0	0	0	0	0	0	0	0
SEQF3104.1	GCA_002890585.1	Tannerella	sp._HMT_808	Bacteroidales	1	0	0	0	0	1	1	1	2	0	1	1	0	0	0	0	0
SEQF3105.1	GCA_002890575.1	Tannerella	sp._HMT_808	Bacteroidales	1	0	0	0	0	1	1	1	2	0	1	1	0	0	0	0	0
SEQF3106.1	GCA_002890635.1	Tannerella	sp._HMT_808	Bacteroidales	1	0	0	0	0	1	1	1	2	0	1	0	0	0	0	0	0
SEQF3107.1	GCA_000503875.1	Absconditabacteria	bacterium_HMT_991	Candidatus Absconditabacteria	0	0	0	0	0	0	0	1	0	0	0	0	0	0	0	0	0
SEQF3131.1	GCA_010202845.1	Saccharibacteria	bacterium_HMT_488	Saccharibacteria	0	0	0	0	0	0	0	1	0	0	0	0	0	0	0	0	0
SEQF3132.1	GCA_010202645.1	Saccharibacteria	bacterium_HMT_488	Saccharibacteria	1	0	0	0	0	0	0	1	0	0	0	0	0	0	0	0	0
SEQF3133.1	GCA_010202465.1	Saccharibacteria	bacterium_HMT_488	Saccharibacteria	0	0	0	0	0	0	0	1	0	0	0	0	0	0	0	0	0
SEQF3134.1	GCA_010202115.1	Saccharibacteria	bacterium_HMT_488	Saccharibacteria	0	0	0	0	0	0	0	1	0	0	0	0	0	0	0	0	0
SEQF3135.1	GCA_010202265.1	Saccharibacteria	bacterium_HMT_955	Saccharibacteria	0	0	0	0	0	0	0	1	1	0	0	0	0	0	0	0	0
SEQF3136.1	GCA_010201925.1	Saccharibacteria	bacterium_HMT_955	Saccharibacteria	0	0	0	0	0	0	0	1	1	0	0	0	0	0	0	0	0
SEQF3137.1	GCA_013100845.1	Saccharibacteria	bacterium_HMT_488	Saccharibacteria	0	0	0	0	0	0	0	1	0	0	0	0	0	0	0	0	0
SEQF3138.1	GCA_013099195.1	Saccharibacteria	bacterium_HMT_488	Saccharibacteria	1	0	0	0	0	0	0	1	0	0	0	0	0	0	0	0	0
SEQF3139.1	GCA_013099015.1	Saccharibacteria	bacterium_HMT_488	Saccharibacteria	0	0	0	0	0	0	0	1	0	0	0	0	0	0	0	0	0
SEQF3140.1	GCA_013098855.1	Saccharibacteria	bacterium_HMT_955	Saccharibacteria	0	0	0	0	0	0	0	1	1	0	0	0	0	0	0	0	0
SEQF3141.1	GCA_013100825.1	Saccharibacteria	bacterium_HMT_488	Saccharibacteria	1	0	0	0	0	0	0	1	0	0	0	0	0	0	0	0	0
SEQF3142.1	GCA_013098655.1	Saccharibacteria	bacterium_HMT_955	Saccharibacteria	0	0	0	0	0	0	0	1	1	0	0	0	0	0	0	0	0
SEQF3143.1	GCA_013098515.1	Saccharibacteria	bacterium_HMT_488	Saccharibacteria	1	0	0	0	0	0	0	1	0	0	0	0	0	0	0	0	0
SEQF3144.1	GCA_013100805.1	Saccharibacteria	bacterium_HMT_488	Saccharibacteria	0	0	0	0	0	0	0	1	0	0	0	0	0	0	0	0	0
SEQF3145.1	GCA_004104015.1	Actinomyces	oricola	Actinomycetales	0	0	0	0	0	0	0	0	0	0	0	0	0	0	0	0	0
SEQF3146.1	GCA_002847745.1	Anaerococcus	octavius	Tissierellales	0	0	0	0	0	0	0	1	1	0	1	1	0	0	0	1	0
SEQF3147.1	GCA_900445265.1	Anaerococcus	octavius	Tissierellales	0	0	0	0	0	0	0	1	1	0	1	1	0	0	0	1	0
SEQF3148.1	GCA_006717005.1	Bosea	vestrisii	Hyphomicrobiales	1	0	0	0	1	1	0	1	1	0	0	1	0	0	0	0	0
SEQF3149.1	GCA_003688935.1	Corynebacterium	macginleyi	Mycobacteriales	1	0	0	0	0	0	0	1	0	0	0	3	0	0	0	0	0
SEQF3150.1	GCA_012396315.1	Corynebacterium	mucifaciens	Mycobacteriales	1	0	0	0	0	0	0	1	0	0	0	3	0	0	0	0	0
SEQF3151.1	GCA_009828055.1	Erythrobacter	ramosus	Sphingomonadales	1	0	0	1	1	1	0	1	1	1	0	0	0	0	0	0	0
SEQF3152.1	GCA_003014445.1	Fusobacterium	naviforme	Fusobacteriales	0	0	0	0	0	0	0	1	1	0	1	0	0	0	0	1	0
SEQF3153.1	GCA_002863305.1	Neisseria	perflava	Neisseriales	0	1	0	1	1	1	1	1	1	0	1	0	0	0	0	0	0
SEQF3154.1	GCA_900176115.1	Peptoniphilus	asaccharolyticus	Tissierellales	1	0	0	1	1	1	1	1	1	0	1	0	0	0	0	0	0
SEQF3155.1	GCA_002933415.1	Schlegelella	thermodepolymerans	Burkholderiales	1	1	1	1	1	1	0	1	1	1	0	0	0	0	0	0	0
SEQF3156.1	GCA_004342465.1	Schlegelella	thermodepolymerans	Burkholderiales	1	1	1	1	1	1	0	1	1	1	0	0	0	0	0	0	0
SEQF3157.1	GCA_007991655.1	Segetibacter	aerophilus	Chitinophagales	1	0	0	1	0	0	0	1	3	1	0	0	0	0	0	0	0
SEQF3158.1	GCA_900573895.1	Treponema	pectinovorum	Spirochaetales	0	0	0	0	0	0	0	0	0	0	0	0	0	0	0	0	0
SEQF3159.1	GCA_007990635.1	Leptotrichia	hongkongensis	Fusobacteriales	1	0	0	0	0	0	0	1	1	0	1	0	0	1	0	0	0
SEQF3160.1	GCA_003349825.1	Schlegelella	thermodepolymerans	Burkholderiales	1	1	1	1	1	1	0	1	1	1	0	0	0	0	0	0	0
SEQF3161.1	GCA_003688955.1	Corynebacterium	macginleyi	Mycobacteriales	1	0	0	0	0	0	0	1	0	0	0	3	0	0	0	0	0
SEQF3162.1	GCA_003688975.1	Corynebacterium	macginleyi	Mycobacteriales	1	0	0	0	0	0	0	1	0	0	0	3	0	0	0	0	0
SEQF3163.1	GCA_008801825.1	Fusobacterium	naviforme	Fusobacteriales	0	0	0	0	0	0	0	1	1	0	1	0	0	0	0	1	0
SEQF3164.1	GCA_900450945.1	Fusobacterium	naviforme	Fusobacteriales	0	0	0	0	0	0	0	1	1	0	1	0	0	0	0	1	0
SEQF3165.1	GCA_900497565.1	Treponema	pectinovorum	Spirochaetales	0	0	0	0	0	0	0	0	0	0	0	0	0	0	0	0	0
SEQF3166.1	GCA_900497585.1	Treponema	pectinovorum	Spirochaetales	0	0	0	0	0	0	0	0	0	0	0	0	0	0	0	0	0
SEQF3167.1	GCA_900497595.1	Treponema	pectinovorum	Spirochaetales	0	0	0	0	0	0	0	0	0	0	0	0	0	0	0	0	0
SEQF3168.1	GCA_900566195.1	Treponema	pectinovorum	Spirochaetales	0	0	0	0	0	0	0	0	0	0	0	0	0	0	0	0	0
SEQF3169.3	GCA_000148585.3	Streptococcus	mitis	Lactobacillales	1	0	1	0	1	1	1	1	1	0	1	0	0	0	0	1	0
SEQF3170.1	GCA_013394755.1	Saccharibacteria	bacterium_HMT_488	Saccharibacteria	0	0	0	0	0	0	0	1	0	0	0	0	0	0	0	0	0
SEQF3171.1	GCA_013394805.1	Mogibacterium	timidum	Peptostreptococcales	1	0	0	0	0	0	0	1	1	0	1	0	0	0	0	0	0
SEQF3172.1	GCA_002871875.1	Brevibacterium	paucivorans	Micrococcales	1	0	0	0	0	0	0	1	0	0	0	1	0	0	0	0	0
SEQF3173.1	GCA_013394695.1	Streptococcus	sp._HMT_061	Lactobacillales	1	0	0	0	0	0	0	1	1	0	1	0	0	0	0	1	0
SEQF3174.1	GCA_013394735.1	Capnocytophaga	sp._HMT_902	Flavobacteriales	1	0	0	1	0	0	0	1	1	0	1	0	0	0	0	0	0
SEQF3175.1	GCA_013394775.1	Oribacterium	sp._HMT_102	Lachnospirales	0	0	0	0	0	0	0	1	1	0	1	0	0	0	0	1	0
SEQF3176.1	GCA_013394785.1	Capnocytophaga	sp._HMT_903	Flavobacteriales	1	0	0	1	0	0	0	1	1	0	1	0	0	0	0	0	0
SEQF3177.1	GCA_013394795.1	Leptotrichia	sp._HMT_223	Fusobacteriales	2	0	0	1	0	0	0	1	1	0	1	0	0	1	0	0	1
SEQF3178.1	GCA_013394865.1	Leptotrichia	sp._HMT_417	Fusobacteriales	1	0	0	0	0	0	0	1	1	0	1	0	0	1	0	0	0
SEQF3179.1	GCA_013394875.1	Peptostreptococcaceae	bacterium_HMT_081	Peptostreptococcales	0	0	0	0	0	0	0	1	1	1	0	0	0	0	0	1	0
SEQF3180.1	GCA_013394715.1	Actinomyces	sp._HMT_169	Actinomycetales	1	0	0	0	0	0	0	0	0	0	0	0	0	0	0	0	0
SEQF3181.1	GCA_900095705.1	Fusobacterium	sp._HMT_248	Fusobacteriales	0	0	0	0	0	0	0	0	0	0	0	0	0	0	0	0	0
SEQF3182.1	GCA_002204455.1	Porphyromonas	gingivalis	Bacteroidales	1	0	0	1	1	1	1	1	2	1	0	0	0	0	0	0	0
SEQF3183.1	GCA_002206065.1	Porphyromonas	gingivalis	Bacteroidales	1	0	0	1	1	1	1	1	2	1	0	0	0	0	0	0	0
SEQF3184.1	GCA_002206085.1	Porphyromonas	gingivalis	Bacteroidales	1	0	0	1	1	1	1	1	2	1	0	0	0	0	0	0	0
SEQF3185.1	GCA_002206105.1	Porphyromonas	gingivalis	Bacteroidales	1	0	0	1	1	1	1	1	2	1	0	0	0	0	0	0	0
SEQF3186.1	GCA_002208045.1	Porphyromonas	gingivalis	Bacteroidales	1	0	0	1	1	1	1	1	2	1	0	0	0	0	0	0	0
SEQF3187.1	GCA_002529125.1	Porphyromonas	gingivalis	Bacteroidales	1	0	0	1	1	1	1	1	2	1	0	0	0	0	0	0	0
SEQF3188.1	GCA_002529145.1	Porphyromonas	gingivalis	Bacteroidales	1	0	0	1	1	1	1	1	2	1	0	0	0	0	0	0	0
SEQF3189.1	GCA_002529155.1	Porphyromonas	gingivalis	Bacteroidales	1	0	0	1	1	1	1	1	2	1	0	0	0	0	0	0	0
SEQF3190.1	GCA_002529185.1	Porphyromonas	gingivalis	Bacteroidales	1	0	0	1	1	1	1	1	2	1	0	0	0	0	0	0	0
SEQF3191.1	GCA_002529205.1	Porphyromonas	gingivalis	Bacteroidales	1	0	0	1	1	1	1	1	2	1	0	0	0	0	0	0	0
SEQF3192.1	GCA_002529215.1	Porphyromonas	gingivalis	Bacteroidales	1	0	0	1	1	1	1	1	2	1	0	0	0	0	0	0	0
SEQF3193.1	GCA_002529235.1	Porphyromonas	gingivalis	Bacteroidales	1	0	0	1	1	1	1	1	2	1	0	0	0	0	0	0	0
SEQF3194.1	GCA_002529285.1	Porphyromonas	gingivalis	Bacteroidales	1	0	0	1	1	1	1	1	2	1	0	0	0	0	0	0	0
SEQF3195.1	GCA_002529345.1	Porphyromonas	gingivalis	Bacteroidales	1	0	0	1	1	1	1	1	2	1	0	0	0	0	0	0	0
SEQF3196.1	GCA_002529355.1	Porphyromonas	gingivalis	Bacteroidales	1	0	0	1	1	1	1	1	2	1	0	0	0	0	0	0	0
SEQF3197.1	GCA_002529365.1	Porphyromonas	gingivalis	Bacteroidales	1	0	0	1	1	1	1	1	2	1	0	0	0	0	0	0	0
SEQF3198.1	GCA_002529375.1	Porphyromonas	gingivalis	Bacteroidales	1	0	0	1	1	1	1	1	2	1	0	0	0	0	0	0	0
SEQF3199.1	GCA_002529425.1	Porphyromonas	gingivalis	Bacteroidales	1	0	0	1	1	1	1	1	2	1	0	0	0	0	0	0	0
SEQF3200.1	GCA_002753935.1	Porphyromonas	gingivalis	Bacteroidales	1	0	0	1	1	1	1	1	2	1	0	0	0	0	0	0	0
SEQF3201.1	GCA_002753955.1	Porphyromonas	gingivalis	Bacteroidales	1	0	0	1	1	1	1	1	2	1	0	0	0	0	0	0	0
SEQF3202.1	GCA_002753975.1	Porphyromonas	gingivalis	Bacteroidales	1	0	0	1	1	1	1	1	2	1	0	0	0	0	0	0	0
SEQF3203.1	GCA_002754015.1	Porphyromonas	gingivalis	Bacteroidales	1	0	0	1	1	1	1	1	2	1	0	0	0	0	0	0	0
SEQF3204.1	GCA_002754035.1	Porphyromonas	gingivalis	Bacteroidales	1	0	0	1	1	1	1	1	2	1	0	0	0	0	0	0	0
SEQF3205.1	GCA_002754055.1	Porphyromonas	gingivalis	Bacteroidales	1	0	0	1	1	1	1	1	2	1	0	0	0	0	0	0	0
SEQF3206.1	GCA_002754075.1	Porphyromonas	gingivalis	Bacteroidales	1	0	0	1	1	1	1	1	2	1	0	0	0	0	0	0	0
SEQF3207.1	GCA_002754095.1	Porphyromonas	gingivalis	Bacteroidales	1	0	0	1	1	1	1	1	2	1	0	0	0	0	0	0	0
SEQF3208.1	GCA_002754115.1	Porphyromonas	gingivalis	Bacteroidales	1	0	0	1	1	1	1	1	2	1	0	0	0	0	0	0	0
SEQF3209.1	GCA_002754135.1	Porphyromonas	gingivalis	Bacteroidales	1	0	0	1	1	1	1	1	2	1	0	0	0	0	0	0	0
SEQF3210.1	GCA_002754155.1	Porphyromonas	gingivalis	Bacteroidales	1	0	0	1	1	1	1	1	2	1	0	0	0	0	0	0	0
SEQF3211.1	GCA_002892555.1	Porphyromonas	gingivalis	Bacteroidales	1	0	0	1	1	1	1	1	2	1	0	0	0	0	0	0	0
SEQF3212.1	GCA_003514485.1	Porphyromonas	gingivalis	Bacteroidales	0	0	0	1	1	1	1	1	2	1	0	0	0	0	0	0	0
SEQF3213.1	GCA_003862255.1	Porphyromonas	gingivalis	Bacteroidales	1	0	0	1	1	1	1	1	2	1	0	0	0	0	0	0	0
SEQF3214.1	GCA_004214925.1	Porphyromonas	gingivalis	Bacteroidales	1	0	0	1	1	1	1	1	2	1	0	0	0	0	0	0	0
SEQF3215.1	GCA_004214945.1	Porphyromonas	gingivalis	Bacteroidales	1	0	0	1	1	1	1	1	2	1	0	0	0	0	0	0	0
SEQF3216.1	GCA_900157215.1	Porphyromonas	gingivalis	Bacteroidales	1	0	0	1	1	1	1	1	2	1	0	0	0	0	0	0	0
SEQF3217.1	GCA_900157225.1	Porphyromonas	gingivalis	Bacteroidales	1	0	0	1	1	1	1	1	2	1	0	0	0	0	0	0	0
SEQF3218.1	GCA_900157235.1	Porphyromonas	gingivalis	Bacteroidales	1	0	0	1	1	1	1	1	2	1	0	0	0	0	0	0	0
SEQF3219.1	GCA_900157245.1	Porphyromonas	gingivalis	Bacteroidales	1	0	0	1	1	1	1	1	2	1	0	0	0	0	0	0	0
SEQF3220.1	GCA_900157255.1	Porphyromonas	gingivalis	Bacteroidales	1	0	0	1	1	1	1	1	2	1	0	0	0	0	0	0	0
SEQF3221.1	GCA_900157265.1	Porphyromonas	gingivalis	Bacteroidales	1	0	0	1	1	1	1	1	2	1	0	0	0	0	0	0	0
SEQF3222.1	GCA_900157275.1	Porphyromonas	gingivalis	Bacteroidales	1	0	0	1	1	1	1	1	2	1	0	0	0	0	0	0	0
SEQF3223.1	GCA_900157285.1	Porphyromonas	gingivalis	Bacteroidales	1	0	0	1	1	1	1	1	2	1	0	0	0	0	0	0	0
SEQF3224.1	GCA_900157295.1	Porphyromonas	gingivalis	Bacteroidales	1	0	0	1	1	1	1	1	2	1	0	0	0	0	0	0	0
SEQF3225.1	GCA_900157325.1	Porphyromonas	gingivalis	Bacteroidales	1	0	0	1	1	1	1	1	2	1	0	0	0	0	0	0	0
SEQF3226.1	GCA_900157345.1	Porphyromonas	gingivalis	Bacteroidales	1	0	0	1	1	1	1	1	2	1	0	0	0	0	0	0	0
SEQF3228.2	GCA_000228745.2	Streptococcus	mutans	Lactobacillales	0	0	0	0	0	0	0	0	0	0	0	0	0	0	0	0	0
SEQF3229.2	GCA_000228765.2	Streptococcus	mutans	Lactobacillales	0	0	0	0	0	0	0	0	0	0	0	0	0	0	0	0	0
SEQF3230.2	GCA_000228785.2	Streptococcus	mutans	Lactobacillales	0	0	0	0	0	0	0	0	0	0	0	0	0	0	0	0	0
SEQF3231.2	GCA_000228805.2	Streptococcus	mutans	Lactobacillales	0	0	0	0	0	0	0	0	0	0	0	0	0	0	0	0	0
SEQF3232.2	GCA_000228825.2	Streptococcus	mutans	Lactobacillales	0	0	0	0	0	0	0	0	0	0	0	0	0	0	0	0	0
SEQF3233.2	GCA_000228845.2	Streptococcus	mutans	Lactobacillales	0	0	0	0	0	0	0	0	0	0	0	0	0	0	0	0	0
SEQF3234.2	GCA_000228865.2	Streptococcus	mutans	Lactobacillales	0	0	0	0	0	0	0	0	0	0	0	0	0	0	0	0	0
SEQF3235.2	GCA_000228885.2	Streptococcus	mutans	Lactobacillales	0	0	0	0	0	0	0	0	0	0	0	0	0	0	0	0	0
SEQF3236.2	GCA_000228905.2	Streptococcus	mutans	Lactobacillales	0	0	0	0	0	0	0	0	0	0	0	0	0	0	0	0	0
SEQF3237.2	GCA_000228925.2	Streptococcus	mutans	Lactobacillales	0	0	0	0	0	0	0	0	0	0	0	0	0	0	0	0	0
SEQF3238.2	GCA_000228945.2	Streptococcus	mutans	Lactobacillales	0	0	0	0	0	0	0	0	0	0	0	0	0	0	0	0	0
SEQF3239.2	GCA_000228965.2	Streptococcus	mutans	Lactobacillales	0	0	0	0	0	0	0	0	0	0	0	0	0	0	0	0	0
SEQF3240.2	GCA_000228985.2	Streptococcus	mutans	Lactobacillales	0	0	0	0	0	0	0	0	0	0	0	0	0	0	0	0	0
SEQF3241.2	GCA_000229005.2	Streptococcus	mutans	Lactobacillales	0	0	0	0	0	0	0	0	0	0	0	0	0	0	0	0	0
SEQF3242.2	GCA_000229025.2	Streptococcus	mutans	Lactobacillales	0	0	0	0	0	0	0	0	0	0	0	0	0	0	0	0	0
SEQF3243.2	GCA_000229045.2	Streptococcus	mutans	Lactobacillales	0	0	0	0	0	0	0	0	0	0	0	0	0	0	0	0	0
SEQF3244.2	GCA_000229065.2	Streptococcus	mutans	Lactobacillales	0	0	0	0	0	0	0	0	0	0	0	0	0	0	0	0	0
SEQF3245.2	GCA_000229085.2	Streptococcus	mutans	Lactobacillales	0	0	0	0	0	0	0	0	0	0	0	0	0	0	0	0	0
SEQF3246.2	GCA_000229105.2	Streptococcus	mutans	Lactobacillales	0	0	0	0	0	0	0	0	0	0	0	0	0	0	0	0	0
SEQF3247.2	GCA_000229125.2	Streptococcus	mutans	Lactobacillales	0	0	0	0	0	0	0	0	0	0	0	0	0	0	0	0	0
SEQF3248.2	GCA_000229145.2	Streptococcus	mutans	Lactobacillales	0	0	0	0	0	0	0	0	0	0	0	0	0	0	0	0	0
SEQF3249.2	GCA_000229165.2	Streptococcus	mutans	Lactobacillales	0	0	0	0	0	0	0	0	0	0	0	0	0	0	0	0	0
SEQF3250.2	GCA_000229185.2	Streptococcus	mutans	Lactobacillales	0	0	0	0	0	0	0	0	0	0	0	0	0	0	0	0	0
SEQF3251.2	GCA_000229205.2	Streptococcus	mutans	Lactobacillales	0	0	0	0	0	0	0	0	0	0	0	0	0	0	0	0	0
SEQF3252.2	GCA_000229225.2	Streptococcus	mutans	Lactobacillales	0	0	0	0	0	0	0	0	0	0	0	0	0	0	0	0	0
SEQF3253.2	GCA_000229245.2	Streptococcus	mutans	Lactobacillales	0	0	0	0	0	0	0	0	0	0	0	0	0	0	0	0	0
SEQF3254.2	GCA_000229265.2	Streptococcus	mutans	Lactobacillales	0	0	0	0	0	0	0	0	0	0	0	0	0	0	0	0	0
SEQF3255.2	GCA_000229285.2	Streptococcus	mutans	Lactobacillales	0	0	0	0	0	0	0	0	0	0	0	0	0	0	0	0	0
SEQF3256.2	GCA_000229305.2	Streptococcus	mutans	Lactobacillales	0	0	0	0	0	0	0	0	0	0	0	0	0	0	0	0	0
SEQF3257.2	GCA_000229325.2	Streptococcus	mutans	Lactobacillales	0	0	0	0	0	0	0	0	0	0	0	0	0	0	0	0	0
SEQF3258.2	GCA_000229345.2	Streptococcus	mutans	Lactobacillales	0	0	0	0	0	0	0	0	0	0	0	0	0	0	0	0	0
SEQF3259.2	GCA_000229365.2	Streptococcus	mutans	Lactobacillales	0	0	0	0	0	0	0	0	0	0	0	0	0	0	0	0	0
SEQF3260.2	GCA_000229385.2	Streptococcus	mutans	Lactobacillales	0	0	0	0	0	0	0	0	0	0	0	0	0	0	0	0	0
SEQF3261.2	GCA_000229405.2	Streptococcus	mutans	Lactobacillales	0	0	0	0	0	0	0	0	0	0	0	0	0	0	0	0	0
SEQF3262.2	GCA_000229425.2	Streptococcus	mutans	Lactobacillales	0	0	0	0	0	0	0	0	0	0	0	0	0	0	0	0	0
SEQF3263.2	GCA_000229445.2	Streptococcus	mutans	Lactobacillales	0	0	0	0	0	0	0	0	0	0	0	0	0	0	0	0	0
SEQF3264.2	GCA_000229465.2	Streptococcus	mutans	Lactobacillales	0	0	0	0	0	0	0	0	0	0	0	0	0	0	0	0	0
SEQF3265.2	GCA_000229485.2	Streptococcus	mutans	Lactobacillales	0	0	0	0	0	0	0	0	0	0	0	0	0	0	0	0	0
SEQF3266.2	GCA_000229505.2	Streptococcus	mutans	Lactobacillales	0	0	0	0	0	0	0	0	0	0	0	0	0	0	0	0	0
SEQF3267.2	GCA_000229525.2	Streptococcus	mutans	Lactobacillales	0	0	0	0	0	0	0	0	0	0	0	0	0	0	0	0	0
SEQF3268.2	GCA_000229545.2	Streptococcus	mutans	Lactobacillales	0	0	0	0	0	0	0	0	0	0	0	0	0	0	0	0	0
SEQF3269.2	GCA_000229565.2	Streptococcus	mutans	Lactobacillales	0	0	0	0	0	0	0	0	0	0	0	0	0	0	0	0	0
SEQF3270.2	GCA_000229585.2	Streptococcus	mutans	Lactobacillales	0	0	0	0	0	0	0	0	0	0	0	0	0	0	0	0	0
SEQF3271.2	GCA_000229605.2	Streptococcus	mutans	Lactobacillales	0	0	0	0	0	0	0	0	0	0	0	0	0	0	0	0	0
SEQF3272.2	GCA_000229625.2	Streptococcus	mutans	Lactobacillales	0	0	0	0	0	0	0	0	0	0	0	0	0	0	0	0	0
SEQF3273.2	GCA_000229645.2	Streptococcus	mutans	Lactobacillales	0	0	0	0	0	0	0	0	0	0	0	0	0	0	0	0	0
SEQF3274.2	GCA_000229665.2	Streptococcus	mutans	Lactobacillales	0	0	0	0	0	0	0	0	0	0	0	0	0	0	0	0	0
SEQF3275.2	GCA_000229685.2	Streptococcus	mutans	Lactobacillales	0	0	0	0	0	0	0	0	0	0	0	0	0	0	0	0	0
SEQF3276.2	GCA_000229705.2	Streptococcus	mutans	Lactobacillales	0	0	0	0	0	0	0	0	0	0	0	0	0	0	0	0	0
SEQF3277.2	GCA_000229725.2	Streptococcus	mutans	Lactobacillales	0	0	0	0	0	0	0	0	0	0	0	0	0	0	0	0	0
SEQF3278.2	GCA_000229745.2	Streptococcus	mutans	Lactobacillales	0	0	0	0	0	0	0	0	0	0	0	0	0	0	0	0	0
SEQF3279.2	GCA_000229765.2	Streptococcus	mutans	Lactobacillales	0	0	0	0	0	0	0	0	0	0	0	0	0	0	0	0	0
SEQF3280.2	GCA_000229785.2	Streptococcus	mutans	Lactobacillales	0	0	0	0	0	0	0	0	0	0	0	0	0	0	0	0	0
SEQF3281.2	GCA_000229805.2	Streptococcus	mutans	Lactobacillales	0	0	0	0	0	0	0	0	0	0	0	0	0	0	0	0	0
SEQF3282.2	GCA_000229825.2	Streptococcus	mutans	Lactobacillales	0	0	0	0	0	0	0	0	0	0	0	0	0	0	0	0	0
SEQF3283.2	GCA_000229845.2	Streptococcus	mutans	Lactobacillales	0	0	0	0	0	0	0	0	0	0	0	0	0	0	0	0	0
SEQF3284.2	GCA_000229865.2	Streptococcus	mutans	Lactobacillales	0	0	0	0	0	0	0	0	0	0	0	0	0	0	0	0	0
SEQF3285.2	GCA_000229885.2	Streptococcus	mutans	Lactobacillales	0	0	0	0	0	0	0	0	0	0	0	0	0	0	0	0	0
SEQF3286.2	GCA_000229905.2	Streptococcus	mutans	Lactobacillales	0	0	0	0	0	0	0	0	0	0	0	0	0	0	0	0	0
SEQF3287.2	GCA_000229925.2	Streptococcus	mutans	Lactobacillales	0	0	0	0	0	0	0	0	0	0	0	0	0	0	0	0	0
SEQF3288.2	GCA_000229945.2	Streptococcus	mutans	Lactobacillales	0	0	0	0	0	0	0	0	0	0	0	0	0	0	0	0	0
SEQF3289.2	GCA_000229965.2	Streptococcus	mutans	Lactobacillales	0	0	0	0	0	0	0	0	0	0	0	0	0	0	0	0	0
SEQF3290.2	GCA_000229985.2	Streptococcus	mutans	Lactobacillales	0	0	0	0	0	0	0	0	0	0	0	0	0	0	0	0	0
SEQF3291.2	GCA_000230005.2	Streptococcus	mutans	Lactobacillales	0	0	0	0	0	0	0	0	0	0	0	0	0	0	0	0	0
SEQF3292.2	GCA_000230025.2	Streptococcus	mutans	Lactobacillales	0	0	0	0	0	0	0	0	0	0	0	0	0	0	0	0	0
SEQF3293.2	GCA_000230045.2	Streptococcus	mutans	Lactobacillales	0	0	0	0	0	0	0	0	0	0	0	0	0	0	0	0	0
SEQF3294.2	GCA_000230065.2	Streptococcus	mutans	Lactobacillales	0	0	0	0	0	0	0	0	0	0	0	0	0	0	0	0	0
SEQF3295.2	GCA_000230085.2	Streptococcus	mutans	Lactobacillales	0	0	0	0	0	0	0	0	0	0	0	0	0	0	0	0	0
SEQF3296.2	GCA_000230105.2	Streptococcus	mutans	Lactobacillales	0	0	0	0	0	0	0	0	0	0	0	0	0	0	0	0	0
SEQF3297.2	GCA_000230125.2	Streptococcus	mutans	Lactobacillales	0	0	0	0	0	0	0	0	0	0	0	0	0	0	0	0	0
SEQF3298.2	GCA_000230145.2	Streptococcus	mutans	Lactobacillales	0	0	0	0	0	0	0	0	0	0	0	0	0	0	0	0	0
SEQF3299.2	GCA_000230165.2	Streptococcus	mutans	Lactobacillales	0	0	0	0	0	0	0	0	0	0	0	0	0	0	0	0	0
SEQF3300.2	GCA_000230185.2	Streptococcus	mutans	Lactobacillales	0	0	0	0	0	0	0	0	0	0	0	0	0	0	0	0	0
SEQF3301.2	GCA_000230205.2	Streptococcus	mutans	Lactobacillales	0	0	0	0	0	0	0	0	0	0	0	0	0	0	0	0	0
SEQF3302.2	GCA_000230225.2	Streptococcus	mutans	Lactobacillales	0	0	0	0	0	0	0	0	0	0	0	0	0	0	0	0	0
SEQF3303.1	GCA_000271865.1	Streptococcus	mutans	Lactobacillales	1	0	0	0	1	1	1	1	1	1	0	0	0	0	0	0	0
SEQF3304.1	GCA_000284575.1	Streptococcus	mutans	Lactobacillales	1	0	0	0	1	1	1	1	1	1	0	0	0	0	0	0	0
SEQF3305.1	GCA_000339055.1	Streptococcus	mutans	Lactobacillales	1	0	0	0	1	1	1	1	1	1	0	0	0	0	0	0	0
SEQF3306.1	GCA_000339075.1	Streptococcus	mutans	Lactobacillales	1	0	0	0	1	1	1	1	1	1	0	0	0	0	0	0	0
SEQF3307.1	GCA_000339095.1	Streptococcus	mutans	Lactobacillales	1	0	0	0	1	1	1	1	1	1	0	0	0	0	0	0	0
SEQF3308.1	GCA_000339115.1	Streptococcus	mutans	Lactobacillales	1	0	0	0	1	1	1	1	1	1	0	0	0	0	0	0	0
SEQF3309.1	GCA_000339135.1	Streptococcus	mutans	Lactobacillales	1	0	0	0	1	1	1	1	1	1	0	0	0	0	0	0	0
SEQF3310.1	GCA_000339155.1	Streptococcus	mutans	Lactobacillales	1	0	0	0	1	1	1	1	1	1	0	0	0	0	0	0	0
SEQF3311.1	GCA_000339175.1	Streptococcus	mutans	Lactobacillales	1	0	0	0	1	1	1	1	1	1	0	0	0	0	0	0	0
SEQF3312.1	GCA_000339195.1	Streptococcus	mutans	Lactobacillales	1	0	0	0	1	1	1	1	1	1	0	0	0	0	0	0	0
SEQF3313.1	GCA_000339215.1	Streptococcus	mutans	Lactobacillales	1	0	0	0	1	1	1	1	1	1	0	0	0	0	0	0	0
SEQF3314.1	GCA_000339235.1	Streptococcus	mutans	Lactobacillales	1	0	0	0	1	1	1	1	1	1	0	0	0	0	0	0	0
SEQF3315.1	GCA_000339255.1	Streptococcus	mutans	Lactobacillales	1	0	0	0	1	1	1	1	1	0	0	0	0	0	0	0	0
SEQF3316.1	GCA_000339275.1	Streptococcus	mutans	Lactobacillales	1	0	0	0	1	1	0	1	1	1	0	0	0	0	0	0	0
SEQF3317.1	GCA_000339295.1	Streptococcus	mutans	Lactobacillales	1	0	0	0	1	1	1	1	1	1	0	0	0	0	0	0	0
SEQF3318.1	GCA_000339315.1	Streptococcus	mutans	Lactobacillales	0	0	0	0	1	1	1	1	1	1	0	0	0	0	0	0	0
SEQF3319.1	GCA_000339335.1	Streptococcus	mutans	Lactobacillales	1	0	0	0	1	1	1	1	1	1	0	0	0	0	0	0	0
SEQF3320.1	GCA_000339355.1	Streptococcus	mutans	Lactobacillales	1	0	0	0	1	1	1	1	1	1	0	0	0	0	0	0	0
SEQF3321.1	GCA_000339375.1	Streptococcus	mutans	Lactobacillales	1	0	0	0	1	1	1	1	1	1	0	0	0	0	0	0	0
SEQF3322.1	GCA_000339395.1	Streptococcus	mutans	Lactobacillales	1	0	0	0	1	1	1	1	1	1	0	0	0	0	0	0	0
SEQF3323.1	GCA_000339415.1	Streptococcus	mutans	Lactobacillales	1	0	0	0	0	1	1	1	1	1	0	0	0	0	0	0	0
SEQF3324.1	GCA_000339435.1	Streptococcus	mutans	Lactobacillales	1	0	0	0	1	1	1	1	1	1	0	0	0	0	0	0	0
SEQF3325.1	GCA_000339455.1	Streptococcus	mutans	Lactobacillales	1	0	0	0	1	1	1	1	1	1	0	0	0	0	0	0	0
SEQF3326.1	GCA_000339475.1	Streptococcus	mutans	Lactobacillales	1	0	0	0	1	1	1	1	1	1	0	0	0	0	0	0	0
SEQF3327.1	GCA_000339495.1	Streptococcus	mutans	Lactobacillales	1	0	0	0	1	1	1	1	1	1	0	0	0	0	0	0	0
SEQF3328.1	GCA_000339515.1	Streptococcus	mutans	Lactobacillales	1	0	0	0	1	1	1	1	1	1	0	0	0	0	0	0	0
SEQF3329.1	GCA_000339535.1	Streptococcus	mutans	Lactobacillales	1	0	0	0	1	1	1	1	1	1	0	0	0	0	0	0	0
SEQF3330.1	GCA_000339555.1	Streptococcus	mutans	Lactobacillales	1	0	0	0	1	1	1	1	1	1	0	0	0	0	0	0	0
SEQF3331.1	GCA_000339575.1	Streptococcus	mutans	Lactobacillales	1	0	0	0	1	1	1	1	1	1	0	0	0	0	0	0	0
SEQF3332.1	GCA_000339595.1	Streptococcus	mutans	Lactobacillales	1	0	0	0	1	1	1	1	1	1	0	0	0	0	0	0	0
SEQF3333.1	GCA_000339615.1	Streptococcus	mutans	Lactobacillales	1	0	0	0	1	1	1	1	1	1	0	0	0	0	0	0	0
SEQF3334.1	GCA_000339635.1	Streptococcus	mutans	Lactobacillales	1	0	0	0	1	1	1	1	1	1	0	0	0	0	0	0	0
SEQF3335.1	GCA_000339655.1	Streptococcus	mutans	Lactobacillales	1	0	0	0	1	1	1	1	1	1	0	0	0	0	0	0	0
SEQF3336.1	GCA_000339675.1	Streptococcus	mutans	Lactobacillales	1	0	0	0	1	1	1	1	1	1	0	0	0	0	0	0	0
SEQF3337.1	GCA_000339695.1	Streptococcus	mutans	Lactobacillales	1	0	0	0	1	1	1	1	1	1	0	0	0	0	0	0	0
SEQF3338.1	GCA_000339715.1	Streptococcus	mutans	Lactobacillales	1	0	0	0	1	1	1	1	1	1	0	0	0	0	0	0	0
SEQF3339.1	GCA_000339735.1	Streptococcus	mutans	Lactobacillales	1	0	0	0	1	1	1	1	1	1	0	0	0	0	0	0	0
SEQF3340.1	GCA_000339755.1	Streptococcus	mutans	Lactobacillales	1	0	0	0	1	1	1	1	1	1	0	0	0	0	0	0	0
SEQF3341.1	GCA_000339775.1	Streptococcus	mutans	Lactobacillales	1	0	0	0	1	1	1	1	1	1	0	0	0	0	0	0	0
SEQF3342.1	GCA_000339795.1	Streptococcus	mutans	Lactobacillales	1	0	0	0	1	1	1	1	1	1	0	0	0	0	0	0	0
SEQF3343.1	GCA_000339815.1	Streptococcus	mutans	Lactobacillales	1	0	0	0	1	1	1	1	1	1	0	0	0	0	0	0	0
SEQF3344.1	GCA_000339835.1	Streptococcus	mutans	Lactobacillales	1	0	0	0	1	1	1	1	1	1	0	0	0	0	0	0	0
SEQF3345.1	GCA_000339855.1	Streptococcus	mutans	Lactobacillales	1	0	0	0	1	1	1	1	1	1	0	0	0	0	0	0	0
SEQF3346.1	GCA_000339875.1	Streptococcus	mutans	Lactobacillales	1	0	0	0	1	1	1	1	1	1	0	0	0	0	0	0	0
SEQF3347.1	GCA_000339895.1	Streptococcus	mutans	Lactobacillales	1	0	0	0	1	1	1	1	1	1	0	0	0	0	0	0	0
SEQF3348.1	GCA_000339915.1	Streptococcus	mutans	Lactobacillales	1	0	0	0	1	1	0	1	1	1	0	0	0	0	0	0	0
SEQF3349.1	GCA_000339935.1	Streptococcus	mutans	Lactobacillales	1	0	0	0	1	1	1	1	1	1	0	0	0	0	0	0	0
SEQF3350.1	GCA_000339955.1	Streptococcus	mutans	Lactobacillales	1	0	0	0	1	1	1	1	1	1	0	0	0	0	0	0	0
SEQF3351.1	GCA_000339975.1	Streptococcus	mutans	Lactobacillales	1	0	0	0	1	1	1	1	1	1	0	0	0	0	0	0	0
SEQF3352.1	GCA_000339995.1	Streptococcus	mutans	Lactobacillales	1	0	0	0	1	1	1	1	1	1	0	0	0	0	0	0	0
SEQF3353.1	GCA_000340015.1	Streptococcus	mutans	Lactobacillales	1	0	0	0	1	1	1	1	1	1	0	0	0	0	0	0	0
SEQF3354.1	GCA_000340035.1	Streptococcus	mutans	Lactobacillales	1	0	0	0	1	1	1	1	1	1	0	0	0	0	0	0	0
SEQF3355.1	GCA_000340055.1	Streptococcus	mutans	Lactobacillales	1	0	0	0	1	1	1	1	1	1	0	0	0	0	0	0	0
SEQF3356.1	GCA_000340075.1	Streptococcus	mutans	Lactobacillales	1	0	0	0	1	1	1	1	1	1	0	0	0	0	0	0	0
SEQF3357.1	GCA_000340095.1	Streptococcus	mutans	Lactobacillales	1	0	0	0	1	1	1	1	1	1	0	0	0	0	0	0	0
SEQF3358.1	GCA_000340115.1	Streptococcus	mutans	Lactobacillales	1	0	0	0	1	1	1	1	1	1	0	0	0	0	0	0	0
SEQF3359.1	GCA_000340135.1	Streptococcus	mutans	Lactobacillales	1	0	0	0	1	1	1	1	1	1	0	0	0	0	0	0	0
SEQF3360.1	GCA_000340155.1	Streptococcus	mutans	Lactobacillales	1	0	0	0	1	1	1	1	1	1	0	0	0	0	0	0	0
SEQF3361.1	GCA_000340175.1	Streptococcus	mutans	Lactobacillales	1	0	0	0	1	1	1	1	1	1	0	0	0	0	0	0	0
SEQF3362.1	GCA_000347795.1	Streptococcus	mutans	Lactobacillales	1	0	0	0	1	1	1	1	1	1	0	0	0	0	0	0	0
SEQF3363.1	GCA_000347815.1	Streptococcus	mutans	Lactobacillales	1	0	0	0	1	1	1	1	1	1	0	0	0	0	0	0	0
SEQF3364.1	GCA_000347835.1	Streptococcus	mutans	Lactobacillales	1	0	0	0	1	1	1	1	1	1	0	0	0	0	0	0	0
SEQF3365.1	GCA_000347855.1	Streptococcus	mutans	Lactobacillales	1	0	0	0	1	1	1	1	1	1	0	0	0	0	0	0	0
SEQF3366.1	GCA_000347875.1	Streptococcus	mutans	Lactobacillales	1	0	0	0	1	1	1	1	1	1	0	0	0	0	0	0	0
SEQF3367.1	GCA_000347895.1	Streptococcus	mutans	Lactobacillales	1	0	0	0	1	1	1	1	1	1	0	0	0	0	0	0	0
[truncated: 6,625 more rows]
[truncated: 6 more columns]
