# Supplementary material for: Deciphering the Diversity in Bacterial Transporters That Salvage Queuosine Precursors
Source: Epigenomes. 2024 Apr 25;8(2):16. doi: 10.3390/epigenomes8020016 (PMC11130926; doi:10.3390/epigenomes8020016)
Supplement: Supplementary file 1 [file epigenomes-08-00016-s001.zip › dataset S3.xlsx]

## Sheet: dataset S3
Dataset S3. Q pathway profile in given taxon based on Q synthesis and salvage proteins in Uniprot database.
	Count of enzymes						Uniprot ID
taxon	FolE12	QueDEC	QueF	TGT	QueA	QueGH	FolE1	FolE2	QueD	QueE	QueC	QueF	TGT	QueA	QueG	QueH	QueK	Qng1	QrtT	QueT	QPTR
100	1	1	1	1	1	1	A0A4R1I764	na	A0A4R1HM87	na	na	A0A4R1ICV4	A0A4R1I2U4	A0A4R1ICG3	A0A4R1I495	na	na	na	na	na	A0A4R1I0Q7
100035	1	0	0	1	0	0	A0A7C8MK54	na	na	na	na	na	A0A7C8ILL0	na	na	na	A0A7C8IDW4	A0A7C8M641	na	na	na
1000413	1	0	0	1	0	0	A0A5C7HAT5	na	na	na	na	na	A0A5C7H710	na	na	na	A0A5C7HNB1	A0A5C7HQL0	na	na	na
1000565	2	3	1	1	1	1	F5RDN6	F5RDX7	F5RFC0	F5RFB9	F5RG06	F5R9J9	F5R7F9	F5R7G0	F5RHL8	na	na	na	na	na	na
1000566	1	3	0	0	0	0	A0A839DZW2	na	A0A839DQK6	A0A839DRU1	A0A839DX54	na	na	na	na	na	A0A839E2U9	na	na	na	na
1000569	1	3	1	1	1	1	F9MNE2	na	F9MNM6	F9MNM5	F9MQY2	F9MQJ4	F9MNY6	F9MNY5	F9MNS4	na	na	na	F9MPZ5	F9MQJ5	na
1000588	1	3	1	1	1	1	F9LXA7	na	F9LUI3	F9LUI2	F9LUI4	F9LUI1	F9LZE4	F9LW51	na	F9LYF6	na	na	F9LX60	F9LXG9	na
1001064	0	0	0	0	0	0	na	na	na	na	na	na	na	na	na	na	na	G0T0S9	na	na	na
1001240	1	0	0	0	0	0	A0A099JJK3	na	na	na	na	na	na	na	na	na	A0A099JV56	na	na	na	na
1001583	0	0	0	1	1	0	na	na	na	na	na	na	M5AZA8	M5ADI5	na	na	M5AB87	na	M5AC06	M5B1K8	na
1001589	1	3	1	1	1	1	A0A828YZK8	na	A0A828Z0T3	A0A828Z1K9	A0A828Z5L5	A0A828Z1U2	A0A828Z3F9	A0A828YW43	A0A828YWN8	na	na	na	na	na	A0A828Z2W9
1001590	1	3	1	1	1	1	M6GBZ9	na	M6G9H2	M6GH56	M6GTB6	M6GHP1	M6GAE8	M6G7T8	M6GCP9	na	na	na	na	na	M6GXI1
1001595	1	3	1	1	1	1	T0GYH7	na	T0FIH8	T0FPX3	T0FIL5	T0F9R9	T0FPU6	T0FEZ8	T0FL28	na	na	na	na	na	T0GQ54
1001598	1	3	1	1	1	1	M3H4Q9	na	M3HA82	M3IIQ7	M3H679	M3ICN9	M3H8I7	M3GCC7	M3G4W8	na	na	na	na	na	M3H4W2
1001599	1	2	1	0	1	1	M3I0P1	na	M3FYV2	na	M3ICK7	M3GXM6	na	M3H224	M3GUI8	na	na	na	na	na	M3GNP4
1001601	1	3	1	1	1	1	M6H7P9	na	M6H7X3	M6HGP0	M6H896	M6HCU8	M6HKU9	M6HAT9	M6HGY5	na	na	na	na	na	M6HHJ5
1001822	2	3	1	1	1	1	A0A4Q7RTH2	A0A4V2FHU3	A0A4Q7S6X2	A0A4Q7S9A5	A0A4Q7S6C0	A0A4Q7SC52	A0A4Q7S464	A0A4Q7S3W1	A0A4V2FI97	na	na	na	na	na	A0A4Q7S9K8
1001832	1	0	0	1	0	0	A0A1Y2WR92	na	na	na	na	na	A0A1Y2WKY3	na	na	na	A0A1Y2WXM2	A0A1Y2WV08	na	na	na
1001833	1	0	0	1	0	0	A0A1Y2VUP8	na	na	na	na	na	A0A1Y2VR38	na	na	na	A0A1Y2W056	A0A1Y2VML2	na	na	na
1001886	1	3	1	0	1	1	A0A090R0V7	na	A0A090RGF8	A0A090R6V0	A0A090R320	A0A090R7G7	na	A0A090R721	A0A090S890	na	na	na	na	na	A0A090RG10
1001937	1	0	0	1	0	0	A0A1Y2U3M1	na	na	na	na	na	A0A1Y2TMA2	na	na	na	A0A1Y2TFA8	A0A1Y2TJ18	na	na	na
1001938	1	0	0	1	0	0	A0A1Y2VB09	na	na	na	na	na	A0A1Y2VIN1	na	na	na	A0A1Y2V1V8	A0A1Y2UAK9	na	na	na
1001994	1	3	0	0	0	0	F9CUY9	na	F9CXY3	F9CUY8	F9CUM7	na	na	na	na	na	na	na	na	na	na
10020	1	1	0	1	0	0	A0A1S3EWK0	na	A0A1S3EN81	na	na	na	A0A1S3GKU2	na	na	na	na	A0A1S3GEU7	na	na	na
100226	1	1	0	0	1	0	Q9X8I3	na	O86696	na	na	na	na	Q9AJX3	na	na	Q9F2K2	na	na	na	na
1002340	1	3	1	1	1	1	na	A0A0B4E0V2	A0A0B4FI63	A0A0B4E0C1	A0A0B4ECD1	A0A0B4EQK5	A0A0B4ENH5	A0A0B4EPV7	A0A0B4EEG3	na	A0A0B4EDQ9	na	na	na	A0A0B4EJL2
1002364	1	3	1	1	1	1	G9YCB4	na	G9Y5F1	G9Y5E4	G9Y5A1	G9Y9P2	G9YDB9	G9YBD3	G9Y8T0	na	G9YAK8	na	G9Y5S1	na	G9Y910
1002366	1	0	0	0	1	1	H1G8S8	na	na	na	na	na	na	H1GDV1	H1GC68	na	na	na	na	H1GC04	na
1002367	1	1	1	1	1	1	G6B0H0	na	na	na	G6AWV1	G6AZ76	G6B244	G6B0F0	G6AXI4	na	na	na	na	na	G6AZ77
1002368	1	3	1	1	1	1	G9ZA45	na	G9Z3D5	G9Z3N2	G9Z4A1	G9Z3L7	G9Z456	G9Z455	G9YYG8	na	G9YZB3	na	na	na	G9Z0X2
1002370	0	0	0	1	0	0	na	na	na	na	na	na	A0AA38X9G0	na	na	na	na	A0AA39CZG6	na	na	na
1002526	1	0	1	1	1	1	A0A1I5ZKA0	na	na	na	na	A0A1I6AQ23	A0A1I6C7Q8	A0A1I6C7X6	A0A1I5ZYB1	na	na	na	na	na	A0A1I6AV29
1002672	1	0	0	1	0	0	F2I2C6	na	na	na	na	na	F2I198	na	na	na	na	na	na	na	F2I3A7
100268	1	0	0	0	0	0	A0A8J4SZK7	na	na	na	na	na	na	na	na	na	na	A0A8J4SJE4	na	na	na
1002689	1	3	1	1	1	1	A0A9J7BZE9	na	A0A9J7BKR6	A0A9J7BL82	A0A9J7BRD6	A0A9J7BLW8	A0A9J7BTB2	A0A9J7BX27	A0A9J7BPA0	na	A0A9J7BUK1	na	na	na	na
1002804	1	3	1	1	1	1	F8KRC3	na	F8KRX1	F8KRX2	F8KRV0	F8KS13	F8KS50	F8KT74	na	F8KQS7	na	na	na	na	na
1002805	1	3	1	0	1	1	H5VEQ2	na	H5V9H4	H5V9K0	H5VD62	H5VDD2	na	H5VC58	na	H5VBE5	na	na	na	na	na
1002809	1	0	0	1	1	1	F2F6U9	na	na	na	na	na	F2F3G0	F2F3F9	F2EZY1	na	F2F0D4	na	F2FAM5	F2F7B2	na
1002870	1	0	1	1	1	1	A0A7M2Z1P7	na	na	na	na	A0A7M2YZN2	A0A7M2YYM3	A0A7M2YXW1	A0A7M2YXS9	na	A0A7M2YZC8	na	na	na	na
10029	1	1	0	1	0	0	A0A8C2QIW5	na	A0A9J7FW25	na	na	na	A0A8C2L9L8	na	na	na	na	A0A8C2LXT0	na	na	na
1003	1	2	0	1	1	1	A0A1I2JP36	na	A0A1I2GHK8	A0A1I2C5J4	na	na	A0A1I2E8U5	A0A1I2A3X0	A0A1I2I055	na	A0A1I2CTV4	na	na	na	A0A1I2G530
1003114	0	0	0	1	0	0	na	na	na	na	na	na	A0AA51SBL5	na	na	na	na	na	na	na	na
1003181	1	3	1	1	1	1	na	A0A0A6PH84	A0A0A6NYH3	A0A0A6S393	A0A176RZL6	A0A0A6P2D9	A0A0A6P7K3	A0A0A6RWC6	na	A0A0A6RR65	na	na	na	na	A0A0A6P4P2
1003195	1	3	0	0	1	0	F8JT12	na	F8JT14	F8JT13	F8JT15	na	na	F8JXY8	na	na	F8JKT3	na	F8K381	na	na
1003200	2	3	1	1	1	1	F7T8M0	F7T450	F7T6R5	F7T6R6	F7SY36	F7SV03	F7SVZ4	F7SVZ3	na	F7T4T0	na	na	na	na	F7T7B1
1003237	0	1	0	1	0	0	na	na	na	na	G1Y1M0	na	G1Y098	na	na	na	G1XVI0	na	na	na	na
1003335	1	0	0	0	0	0	W0T3X8	na	na	na	na	na	na	na	na	na	W0T4X9	na	na	na	na
1003336	0	0	0	0	0	0	na	na	na	na	na	na	na	na	na	na	T1YUU8	na	na	na	na
10036	1	1	0	1	0	0	A0A1U7RF12	na	A0A1U7QN32	na	na	na	A0A1U7R0N2	na	na	na	na	A0A1U7R329	na	na	na
1003997	1	3	1	1	1	1	A0A917K8U6	na	A0A917NJY6	A0A917K9W5	A0A917NJN9	A0A917KD67	A0A917KAP2	A0A917NJT3	A0A917NKZ7	na	A0A917KBB3	na	na	na	na
1004	1	2	0	1	1	1	A0A1K1PCB2	na	A0A1K1PC17	A0A1K1RE41	na	na	A0A1K1REI2	A0A1K1Q863	A0A1K1ND40	na	na	na	na	na	A0A1K1MX34
1004150	1	3	1	1	1	2	A0A7C9KTK6	na	A0A7C9KGU0	A0A7C9KI81	A0A7C9KCP1	A0A7C9KUV2	A0A7C9GPA9	A0A7C9GIS8	A0A7C9KUR1	A0A7C9GLA8	A0A7C9KHH1	na	na	na	A0A7C9GJG8
1004151	1	3	1	1	1	2	W3V2P2	na	W3V152	W3V0T2	W3VBE8	W3VB68	W3VAY8	W3VDB5	W3VA77	W3V912	W3VBS8	na	na	na	W3V093
1004156	1	3	0	0	1	1	A0A1V4AT27	na	A0A1V4AXY1	A0A1V4AV16	A0A1V4AV25	na	na	A0A1V4AWQ9	na	A0A1V4AVR2	na	na	na	na	na
1004261	1	1	1	1	1	1	na	A0A918D2G6	na	na	A0A917XWN3	A0A917XTY2	A0A917XVL4	A0A918D0F7	A0A917Y438	na	A0A917XT75	na	A0A917XTX8	A0A917XRQ8	A0A918CZU7
1004279	1	3	1	1	1	1	A0A1G9BXK6	na	A0A1G9GN31	A0A1G9GP39	A0A1G9GN56	A0A1G9KRD8	A0A1G8TMI8	A0A1G8TKJ8	A0A1G8P1A4	na	A0A1G8Y6M6	na	na	na	A0A1G8RYS3
1004304	1	2	0	1	1	1	A0A2W7RRH2	na	A0A2W7SBX8	A0A2W7RRK8	na	na	A0A2W7RX62	A0A2W7RRU2	A0A2W7RTL8	na	na	na	na	na	na
100452	1	1	0	1	0	0	A0A8S3ZWF4	na	A0A8S3ZVN1	na	na	na	A0A8S4A9M3	na	na	na	na	A0A8S4A7Q8	na	na	na
100469	1	0	0	1	0	0	A0A3P1SF63	na	na	na	na	na	A0A3P1SFQ3	na	na	na	na	na	na	na	A0A3P1SGF6
1004785	2	3	1	0	1	1	K0D5F2	K0D5N5	K0D359	K0CYT5	K0D1U9	K0CVD8	na	K0D2W5	K0D5I4	na	K0D3U3	na	na	na	na
1004787	1	3	1	0	1	1	K0EK45	na	K0EGE6	K0EDN8	K0E8E6	K0EB29	na	K0EGB5	K0EEI8	na	K0ECL6	na	na	na	na
1004901	1	0	0	1	0	0	A0A2S0KCU8	na	na	na	na	na	A0A2S0KJT7	na	na	na	na	na	na	na	A0A2S0KE00
1004952	1	0	0	1	1	2	G7SFN1	na	na	na	na	na	G7SGN6	G7SE71	G7SFE7	G7SI48	na	na	G7SG84	G7SED9	na
1005039	1	1	1	1	1	1	na	A0A931LXQ7	A0A931PV03	na	na	A0A931PUE2	A0A931PUE8	A0A931LYK1	A0A931LW35	na	na	na	na	na	na
1005043	1	2	1	1	1	1	G2GX21	na	G2GY35	na	G2GXP0	G2GW87	G2GWK8	G2GWK9	G2GYU3	na	na	na	na	na	G2GX45
1005048	2	3	1	1	1	2	G0AA98	G0AHY6	G0AB81	G0AB80	G0ADY9	G0A8E7	G0AI15	G0AI13	G0ADC9	G0AHH6	G0ACD8	na	na	na	na
1005057	0	0	0	1	0	0	na	na	na	na	na	na	G2LP09	na	na	na	na	na	na	na	na
1005058	1	3	1	1	1	1	F4HFC4	na	F4HCV9	F4HCW0	F4HCV8	F4HA72	F4HEB3	F4HEB4	na	F4HFH1	na	na	na	na	F4HBP1
1005090	0	0	0	1	0	0	na	na	na	na	na	na	G2LMK5	na	na	na	na	na	na	na	na
1005394	1	3	1	1	1	1	A0A5I5F9W1	na	A0A5I4V3R0	A0A5H5K3G1	A0A5I6CJG1	A0A5I6CTA4	A0A5H5JVV8	A0A5H5JN32	A0A5I0WUX8	na	A0A5I0X073	na	A0A5I5GR24	na	A0A5I0MWM6
1005395	2	3	1	1	1	1	L1M8A2	L1LX90	L1LYX6	L1LXG8	L1LXJ6	L1M781	L1M0W9	L1M0K7	L1M147	na	na	na	na	na	na
1005665	1	3	1	1	1	1	A0A1C3Z092	na	A0A1C4AUS6	A0A1C4AVC8	A0A1C4ANL5	A0A1C4AW26	A0A1C4AQ92	A0A1C4AQF6	A0A1C3ZV79	na	A0A1C4A5N6	na	na	na	A0A1C4C3Q3
1005667	1	3	1	1	1	1	A0A1C4AU15	na	A0A1C4DTJ6	A0A1C4DTF4	A0A1C4F569	A0A1C4DSK7	A0A1C4DD03	A0A1C4DCZ6	A0A1C4EP11	na	A0A1C3Z0Z1	na	na	na	A0A1C4CUR0
1005704	1	3	1	1	1	1	F5VTQ1	na	F5VV00	F5VV01	F5VUZ9	F5VV02	F5VWE2	F5VTG7	na	F5VUE3	na	na	F5VTK6	F5VSZ6	na
1005705	1	0	0	1	1	1	F5VZ28	na	na	na	na	na	F5W2G7	F5W1A2	na	F5VZN9	na	na	F5VZW1	F5VY40	na
1005740	1	1	0	1	1	1	na	A0A4R8MGP8	A0A4R8MJI0	na	na	na	A0A4R8M599	A0A4R8M4Z8	na	A0A4R8M579	na	na	A0A4R8M7E4	A0A4R8MA37	na
1005926	1	3	0	1	1	1	A0A3A1NP59	na	A0A3A1NR80	A0A3A1NRK7	A0A3A1NS67	na	A0A1M6WH00	A0A3A1NR69	A0A3A1NP25	na	na	na	na	na	A0A3A1NVU7
1005928	2	3	1	1	1	1	A0A1I5DMG9	A0A1I5DPQ7	A0A1I5FFG1	A0A1I5FEF3	A0A1I5FE67	A0A1I5FEC1	A0A1I5CMW6	A0A1I5CKT0	A0A1I4ZXX2	na	A0A1I5CH31	na	na	na	na
1005944	1	0	0	0	0	0	A0A1H0C4J5	na	na	na	na	na	na	na	na	na	na	na	na	na	na
1005945	1	0	0	0	0	0	A0A1I3MZF1	na	na	na	na	na	na	na	na	na	na	na	na	na	na
1005994	1	3	1	1	1	1	A0A085AG64	na	A0A085A888	A0A085A889	A0A085AEJ0	A0A085A8A8	A0A085AE94	A0A085AE95	A0A085AAM7	na	A0A084ZZ56	na	na	na	A0A085A2K2
1005995	1	3	1	1	1	1	A0A085JH92	na	A0A085JAL3	A0A085JAL4	A0A085JAR6	A0A085JAP1	A0A085JAV3	A0A085JAV4	na	A0A085JP97	A0A085JKA5	na	na	na	A0A085JP93
1005999	1	1	1	0	1	1	A0A085HKD9	na	na	na	A0A085HHE5	A0A085HMV0	na	A0A085HHL8	A0A085HF53	na	A0A085HK28	na	na	na	A0A085HCN4
1006004	1	3	1	1	1	1	A0A085G995	na	A0A085G430	A0A085G431	A0A085GI42	A0A085G453	A0A085GI02	A0A085GI01	A0A085GKR6	na	A0A085G292	na	na	na	A0A085G030
1006006	1	3	0	0	0	0	F4G133	na	F4FZ07	F4FZB0	F4FZG1	na	na	na	na	na	na	na	na	na	na
1006007	1	3	1	1	0	1	A0A8D3WVP7	na	A0A8D3X4D4	A0A8D3X1Y5	A0A8D4BPZ2	A0A8D3X4M8	A0A8D3WV13	na	A0A8D3X347	na	A0A8D3X2F5	na	A0A8D3WYG0	A0A8D3X4L1	na
1006155	1	0	0	1	1	1	A0A1S7FTJ0	na	na	na	na	na	A0A1S7FV61	A0A1S7FUY6	A0A1S7FYL5	na	na	na	A0A1S7FTI9	A0A1S7FSL4	na
1006551	1	3	1	1	1	1	A0A0H3HJP5	na	A0A0H3GXS1	A0A0H3H2Y4	A0A0H3H9J3	A0A0H3H0J4	A0A0H3H4A5	A0A0H3HCU2	A0A0H3H4S6	na	A0A0H3H323	na	A0A0H3GYD3	na	A0A0H3H2R8
1006576	0	0	0	1	1	1	na	na	na	na	na	na	A0A0C7NKJ1	A0A0C7NSP8	na	A0A0C7NML5	A0A0C7P0T8	na	A0A0C7NIE8	A0A0C7NRU6	na
1006623	1	3	1	1	1	1	A0A2H9U6U7	na	A0A2H9U0Q9	A0A2H9U7S6	A0A2H9U3N4	A0A2H9U974	A0A2H9U5Z2	A0A2H9U5X8	A0A2H9U5J6	na	na	na	na	na	A0A2H9U772
1006972	1	3	0	0	0	0	H6SUN8	na	H6SU72	H6SUE5	H6SUQ0	na	na	na	na	na	na	na	na	na	na
1007099	1	1	1	1	1	1	A0A1H3E1G8	na	na	na	A0A1H2ZFX2	A0A1H3B8G2	A0A1H2XJL3	A0A1H2XJA7	A0A1H2R2F7	na	A0A1H3CAZ5	na	na	na	A0A1H3F8N6
1007105	1	0	1	1	1	1	na	F4GM99	na	na	na	F4GVG5	F4GQ97	F4GQ96	na	F4GVF0	na	na	na	na	F4GWR3
1007511	1	2	1	1	1	1	A0A5J5I9N1	na	na	A0A5J5IAC0	A0A5J5I633	A0A5J5HZY1	A0A5J5HZA8	A0A5J5I186	A0A5J5I366	na	A0A5J5I0C2	na	na	na	A0A5J5I817
1007676	1	0	0	1	1	0	A0A0H4QLH1	na	na	na	na	na	A0A0H4QIT0	A0A0H4QG70	na	na	A0A0H4QLG1	na	A0A0H4QCZ1	A0A0H4QJG5	na
100784	1	1	0	0	0	0	A0A087V797	na	A0A087VC95	na	na	na	na	na	na	na	na	A0A087V817	na	na	na
100787	1	0	0	1	0	0	A0A0G4L525	na	na	na	na	na	A0A0G4LN76	na	na	na	A0A0G4KCU5	A0A0G4KE12	na	na	na
1008153	0	3	0	0	0	0	na	na	A0A151AK52	A0A151AKG8	A0A151AJQ4	na	na	na	na	na	A0A151AH47	na	na	na	A0A151AC08
100816	1	0	0	1	0	0	A0A175VWI5	na	na	na	na	na	A0A175VT44	na	na	na	A0A175VYR0	A0A175W0X0	na	na	na
100819	1	1	0	0	0	0	A0A8C4U5I0	na	A0A8C4UBP0	na	na	na	na	na	na	na	na	A0A8C4UST3	na	na	na
1008305	1	1	0	1	1	1	na	A0A1E3G575	A0A1E3G215	na	na	na	A0A1E3G330	A0A1E3G4K3	na	A0A1E3G3I9	na	na	A0A1E3G2F3	na	A0A1E3G1M4
1008452	1	3	1	1	1	1	F9HAE1	na	F9H8X8	F9H8X7	F9H8X9	F9H8X6	F9H958	F9HDH8	na	F9HCP5	na	na	F9HBB1	F9HDU0	na
1008453	1	3	1	1	1	1	F9HN36	na	F9HMH5	F9HMH6	F9HMH4	F9HMH7	F9HN18	F9HQ43	na	F9HK26	na	na	F9HL40	F9HLL3	na
1008459	2	3	1	1	1	1	G4QB93	G4Q9V3	G4QDN1	G4QDN2	G4QDN0	G4QCE4	G4QA08	G4QCB1	na	G4Q9Y0	na	na	na	na	na
100861	1	1	0	1	1	0	A0A6G0WU67	na	A0A6G0WJG5	na	na	na	A0A6G0W6A7	A0A6G0WZ21	na	na	na	A0A6G0W8G0	na	na	na
100884	0	0	0	1	1	1	na	na	na	na	na	na	E7GAM2	E7GAM3	na	E7GAM4	na	na	E7G8K5	E7G5M9	na
10089	1	1	0	1	0	0	A0A6P5QTR9	na	A0A6P5QDK1	na	na	na	A0A6P5QKB6	na	na	na	na	A0A6P5QXA5	na	na	na
10090	1	1	0	1	0	0	Q05915	na	A0A1L1SRN0	na	na	na	Q9JMA2	na	na	na	na	G3X8U3	na	na	na
100901	0	0	0	1	0	0	na	na	na	na	na	na	I7IAC6	na	na	na	na	na	na	na	na
100902	1	0	0	0	0	0	A0A8H6GTC6	na	na	na	na	na	na	na	na	na	A0A8H6H3N3	A0A8H6GTQ4	na	na	na
1009370	1	3	1	1	1	1	na	F7NPS4	F7NNG8	F7NNG7	F7NNG9	F7NPH1	F7NND1	F7NQ93	na	F7NQ90	na	na	F7NH49	na	na
1009682	1	3	1	1	1	1	na	A0A7I8ECQ2	A0A7I8EDS1	A0A7I8ED49	A0A7I8EDQ2	A0A7I8E866	A0A7I8E6E7	A0A7I8E6R9	A0A7I8EHF1	na	na	na	na	na	na
1009846	0	0	0	1	0	0	na	na	na	na	na	na	A0A9W3K481	na	na	na	na	na	na	na	na
1009856	1	3	1	1	1	0	W0P0S0	na	W0P4H6	W0P5N6	W0P0R1	W0P0R5	W0P480	W0P5C1	na	na	na	na	na	na	na
1010	1	2	0	1	1	1	A0A239Z4K7	na	A0A239Z4V0	A0A239XE02	na	na	A0A239X5V5	A0A239XQB8	na	A0A239X8A1	na	na	na	na	na
101028	1	0	0	0	0	0	A0A7S8E2I1	na	na	na	na	na	na	na	na	na	A0A7S8DVK9	na	na	na	na
10103	1	1	0	1	0	0	A0A8C6HWP9	na	A0A8C6GJA3	na	na	na	A0A8C6HBM9	na	na	na	na	A0A8C6HNA6	na	na	na
1010610	1	3	1	1	1	1	A0A512JHS4	na	A0A512JLS4	A0A512JJ17	A0A512JLT8	A0A512JMX6	A0A512JIY1	A0A512JIZ0	A0A512JN46	na	na	na	na	na	na
1010611	1	0	0	1	1	1	na	A0A521BFZ8	na	na	na	na	A0A521FQQ3	A0A521EUS1	A0A521ATT0	na	A0A521FG28	na	na	na	A0A521AL56
1010633	1	0	0	1	0	0	A0A835ADE5	na	na	na	na	na	A0A835EH58	na	na	na	A0A835AGN3	na	na	na	na
1010796	1	3	1	1	1	1	A0A9P2I618	na	A0A9P2IEJ5	A0A9P2MP76	A0A9P2I6Z6	A0A9P2IB87	A0A9P2I7B0	A0A9P2I955	A0A9P2MPC6	na	A0A9P2I6Y6	na	A0A9P2I811	na	A0A9P2I9U5
101091	1	1	0	1	0	0	A0A1C7N0L7	na	A0A1C7NMH3	na	na	na	A0A1C7NCU1	na	na	na	na	A0A1C7N5U4	na	na	na
101097	1	1	0	1	0	0	A0A9P6MWT1	na	A0A9P6MYW5	na	na	na	A0A9P6T5R8	na	na	na	A0A9P6MWU7	A0A9P6MQD9	na	na	na
101127	1	1	0	1	0	0	A0A1X2GFR3	na	A0A1X2GGG2	na	na	na	A0A1X2GG75	na	na	na	A0A1X2GPP7	A0A1X2G511	na	na	na
101142	1	1	0	1	0	0	A0A8H7T0S9	na	A0A8H7VVV8	na	na	na	A0A8H7ST91	na	na	na	na	A0A8H7SXQ2	na	na	na
10116	1	1	0	1	0	0	A0A8I5ZYD9	na	A0A8I6A899	na	na	na	A0A0H2UHF3	na	na	na	na	A6KAK3	na	na	na
101201	1	0	0	1	0	0	A0A6V8QSX6	na	na	na	na	na	A0A6V8R070	na	na	na	A0A6V8QS36	A0A6V8QK88	na	na	na
101383	1	2	0	1	1	0	A0A7K3WKZ7	na	A0A7K3WMG9	A0A7K3WQ82	na	na	A0A7K3WMM7	A0A7K3WSB2	na	na	A0A7K3WPF4	na	na	na	A0A7K3WN67
10141	1	1	0	1	0	0	H0V177	na	A0A286XXK8	na	na	na	H0W301	na	na	na	na	H0UXH9	na	na	na
101480	1	0	0	1	0	0	A0A9P5CXH2	na	na	na	na	na	A0A9P4YDV8	na	na	na	A0A9P4YLS9	A0A9P4YJL9	na	na	na
1015	1	2	0	1	1	1	A0A376BYN1	na	A0A380ZSH5	A0A376BYZ8	na	na	A0A380ZS91	A0A380ZVH0	A0A376C190	na	na	na	na	na	na
101510	1	0	0	1	1	0	Q0RVZ8	na	na	na	na	na	Q0S920	Q0SK86	na	na	Q0S0D6	na	na	na	Q0S919
101564	2	3	1	1	1	1	A0A1G7IW14	A0A1G7B376	A0A1G7DJX8	A0A1G6VN38	A0A1G6VM47	A0A1G7J328	A0A1G7PHX4	A0A1G7PHG9	A0A1G6Y3B9	na	na	na	na	na	A0A1G7BRM4
101571	2	3	1	1	1	1	A0A102KH21	A0A102NJB0	A0A105ZF61	A0A104I624	A0A102IHF2	A0A102LQC5	A0A102PNZ7	A0A102KZK3	A0A102K2T4	na	A0A6P2M9Q2	na	na	na	A0A102KYA7
10160	1	1	0	1	0	0	A0A6P6F533	na	A0A6P3FWQ2	na	na	na	A0A6P3FA97	na	na	na	na	A0A6P3F5X0	na	na	na
1016849	1	0	0	1	0	0	A0A0D1ZI01	na	na	na	na	na	A0A0D1WB04	na	na	na	A0A0D1YA88	A0A0D1Z0Y0	na	na	na
1016987	1	1	1	1	1	1	A0A3B7DPH9	na	na	na	A0A3B7DK26	A0A3B7DVY9	A0A3B7DYR6	A0A3B7DQ85	A0A3B7DUL7	na	A0A3B7DVN4	na	na	na	A0A3B7DHV6
1016998	1	3	1	1	1	1	A9N6K0	na	A0A6C6Z6F5	A0A3Z1ED78	A9MWC2	A9N2H7	A9MX29	A0A6C6Z1Y3	A0A3Z1E8E7	na	A9MUJ0	na	A0A3Z1E976	na	A0A6C6Z864
1017	1	2	0	1	1	1	A0A250FQV6	na	A0A250FLL1	A0A250FMY0	na	na	A0A250FS39	A0A250FUU4	na	A0A250FM25	na	na	na	na	na
1017177	1	3	1	1	1	1	A0A7W4P971	na	A0A7W4JAB8	A0A7W4JAC9	A0A7W4JAH6	A0A7W4JGT2	A0A7W4JCU4	A0A7W4JCG5	A0A7W4JCJ8	na	A0A7W4JBK7	na	na	na	na
1017181	1	3	1	1	1	1	A0A7W4J1E9	na	A0A7W4J092	A0A7W4J059	A0A7W4J0P8	A0A7W4J3V1	A0A7W4J1H1	A0A7W4J1C6	A0A7W4J1I1	na	A0A7W4IWU3	na	na	na	na
1017270	1	3	1	1	1	1	A0A0V8JES6	na	A0A0V8J9M8	A0A0V8J9G3	A0A0V8J9R3	A0A0V8J8W0	A0A0V8J9E3	A0A0V8IRG5	A0A0V8JAS9	na	A0A0V8J2K8	na	A0A0V8J8D5	na	A0A0V8J3P0
1017273	2	3	1	1	1	1	A0A1N6P948	A0A1N6V868	A0A1N6YH84	A0A1N6YHB1	A0A1N6YH60	A0A1N6WYE7	A0A1N6PWS7	A0A1N6PX54	A0A1N7B536	na	na	na	A0A1N6PB62	na	na
1017277	1	3	1	1	1	1	na	A0A0V8GEQ6	A0A0V8GDR7	A0A0V8GDS8	A0A0V8GDL1	A0A0V8GE11	A0A0V8GJX5	A0A0V8GJH4	A0A0V8GFQ9	na	na	na	A0A0V8GIY5	na	A0A0V8GKF3
1017319	1	0	0	1	0	0	A0A426QW38	na	na	na	na	na	A0A426R1G1	na	na	na	A0A426R4N6	na	na	na	A0A426R1B3
1017351	0	3	0	0	0	0	na	na	A0A8T8W9I3	A0A8T8WDV8	A0A8T8WDU8	na	na	na	na	na	na	na	na	na	A0A8T8W941
1018	1	2	0	1	1	1	A0A2X2RQV6	na	A0A2X2RFD9	A0A2X2RNE8	na	na	A0A2X2RCR9	A0A2X2SWD4	na	A0A2X2TL41	na	na	na	na	na
10181	1	2	0	1	0	0	G5BF79	na	A0A0N8EU57	na	G5B263	na	G5BUH7	na	na	na	na	G5ARN0	na	na	na
1019	1	2	0	1	1	1	A0A250F239	na	A0A2A3N7T9	A0A250F1X6	na	na	A0A250F6I3	A0A250FD38	na	A0A2A3N465	na	na	na	na	na
101924	1	3	0	1	1	1	A0A7S2ZCS6	na	A0A7S0BJC5	A0A7S2ZJM1	A0A7S2ZPZ1	na	A0A7S0BKS3	A0A7S0BLE3	A0A7S0BGD4	na	na	na	na	na	na
10195	1	1	0	1	0	0	A0A3M7P9A9	na	A0A3M7QI35	na	na	na	A0A3M7T0E2	na	na	na	A0A3M7PEF8	A0A3M7PJ70	na	na	na
102	1	2	0	1	1	0	A0A2S7WU71	na	A0A2S7WI72	A0A2S7WXM9	na	na	A0A2S7WUX6	A0A2S7WI41	na	na	na	na	na	na	A0A2S7WI99
10212	1	0	0	0	0	0	A0A7J7JIM6	na	na	na	na	na	na	na	na	na	na	A0A7J7J1B7	na	na	na
102125	1	3	1	1	1	1	L8M3R3	na	L8M3S3	L8LZ56	L8LX24	L8M241	L8M1U0	L8M510	L8LRT2	na	L8M4A4	na	na	na	na
102148	0	0	0	1	1	1	na	na	na	na	na	na	A0A412PIY8	A0A412PIU4	na	A0A412PIV2	A0A412PEV0	na	A0A412PCL4	A0A412PHJ5	na
102232	1	3	1	1	1	1	L8LP61	na	L8LP76	L8LLT0	L8LM79	L8LRL5	L8LM49	L8LUU7	L8LJQ1	na	na	na	na	na	na
10224	1	0	0	0	0	0	D1LX36	na	na	na	na	na	na	na	na	na	na	na	na	na	na
10228	1	1	0	1	0	0	B3RJS9	na	B3RSD0	na	na	na	B3RNX6	na	na	na	na	B3S4Q8	na	na	na
102285	1	1	0	1	0	0	A0A0R3T8P5	na	A0A0R3TN07	na	na	na	A0A0R3T1F4	na	na	na	na	A0A0R3TMU1	na	na	na
102608	1	3	1	0	1	1	E6NNT4	na	E6NNT0	E6NNS9	E6NPI5	E6NM14	na	E6NKY8	na	E6NMW8	na	na	na	na	na
102611	1	3	1	1	1	1	A0A024BX74	na	A0A024BWE3	A0A024BX79	A0A024BWS0	A0A024BWH8	A0A024BUL8	A0A024BVV3	na	A0A024BUW2	na	na	na	na	na
102617	1	3	1	1	1	1	A0A1U9ITI8	na	A0A1U9ITI5	A0A1U9ITI4	A0A1U9IU85	A0A1U9IVF9	A0A1U9ISJ9	A0A1U9ISS3	na	A0A1U9IS20	na	na	na	na	na
102618	1	3	1	1	1	1	A0A2X5AG00	na	A0A2X4ZXN2	A0A2X5AJW7	A0A2X5CN29	A0A2X5D6B7	A0A2X5D311	A0A2X5A7W5	na	A0A2X5CH83	na	na	na	na	na
102684	1	1	0	1	1	1	A0A380KMZ9	na	na	na	A0A380KMH6	na	A0A380KRA3	A0A380KMR9	na	A0A380KRW4	A0A380KQT9	na	A0A380KM21	na	na
1026882	1	3	1	1	1	1	na	F5SUN8	F5SUN7	F5SXU3	F5SXU2	F5SXH2	F5SZX7	F5SVT7	F5T154	na	na	na	na	na	na
1026970	1	1	0	1	0	0	A0A8C6QDS7	na	A0A8C6QJH3	na	na	na	A0A8C6QZA8	na	na	na	na	A0A8C6QV15	na	na	na
1027249	1	3	1	1	1	1	na	A0A1M7PKA6	A0A1M7IFD6	A0A1M7IER1	A0A1M7IEV1	A0A1M7L3C0	A0A1M7NYY1	A0A1M7NYS3	A0A1M7PXD3	na	na	na	A0A1M7MMT0	na	A0A1M7PPD0
1027273	1	3	1	1	1	1	A0A081N2S9	na	A0A081N8S1	A0A081N9X6	A0A081N9X7	A0A081N515	A0A081NBA6	A0A081NBA5	A0A081MZF4	na	A0A081N6W3	na	na	na	na
1027292	1	1	1	1	1	1	F9DNT1	na	na	na	F9DRZ1	F9DVV1	F9DVG8	F9DVG9	F9DXU8	na	na	na	F9DNV4	F9DS65	F9DVV2
1027361	1	1	0	1	1	1	A0A4D9D7H9	na	A0A4D9CP00	na	na	na	A0A4D9CPQ6	A0A4D9D3D7	A0A4D9D0Z0	na	na	A0A4D9CUX0	na	na	na
1027371	1	1	0	1	0	0	F9VQG4	na	na	na	F9W271	na	F9VW29	na	na	na	F9W0H6	na	na	na	F9VSF2
1027620	1	1	0	0	0	0	A0A401Y439	na	A0A401YCD4	na	na	na	na	na	na	na	na	na	A0A401YCK5	na	na
1027633	1	1	0	1	0	0	A0A543APK5	na	A0A543AN69	na	na	na	A0A543AFZ6	na	na	na	A0A543A0J6	na	na	na	A0A543AFX1
1027910	1	0	0	0	0	0	A0A6G1NQZ3	na	na	na	na	na	na	na	na	na	A0A6G1NYB4	na	na	na	na
1028	1	2	0	1	1	1	A0A1X7I9C0	na	A0A1X7I8N7	A0A1X7JD36	na	na	A0A1X7ILP6	A0A1X7INI5	A0A1X7JZ77	na	A0A1X7IPX9	na	na	na	A0A1X7KY30
1028307	1	3	1	1	1	2	A0A0H3G3H3	na	A0A0H3FJ62	A0A0H3FIZ2	A0A0H3FSQ7	A0A0H3FLP9	A0A0H3FRY5	A0A0H3FPF0	A0A0H3FVC7	A0A0H3FJE9	A0A0H3FRJ1	na	na	na	A0A0H3FNH3
1028414	1	3	1	1	1	1	A0A229GN64	na	A0A229GBB4	A0A229GIQ0	A0A229GHV0	A0A229G135	A0A229GXB6	A0A229GGI5	A0A229G312	na	na	na	na	na	na
1028416	1	3	1	1	1	1	A0A1U6GM82	na	A0A1U6GLP0	A0A1U6GKK6	A0A1U6GKW1	A0A1U6GJQ0	A0A1U6GNR5	A0A1U6GND6	A0A1U6GK39	na	na	na	na	na	na
1028490	1	1	0	1	1	0	F6IUZ6	na	F6ITV6	na	na	na	F6IWF6	F6IWF7	na	na	F6ISP6	na	F6IRQ0	F6ITZ5	na
1028566	1	3	0	0	0	0	M1IW38	na	M1IQ00	M1IS42	M1J2X1	na	na	na	na	na	M1I4T9	na	na	na	na
1028567	1	3	0	0	0	0	M1IYX9	na	M1IBS1	M1JDL9	M1J9R9	na	na	na	na	na	M1ICE9	na	na	na	na
102862	1	3	1	1	1	1	A0A379EJQ1	na	A0A0G4QI26	A0A0G4QHD6	A0A0G4Q824	A0A0G4QBY2	A0A0G4Q896	A0A0G4Q7F7	A0A0G4QF85	na	na	na	na	na	A0A0G4Q8L5
1028688	1	1	0	0	0	0	A0A0B6XVG8	na	A0A0B6YE78	na	na	na	na	na	na	na	na	A0A0B7A0U7	na	na	na
1028729	1	0	0	1	0	0	K3W0E9	na	na	na	na	na	K3VJW8	na	na	na	K3UYD2	K3W1Z4	na	na	na
1028742	1	2	1	1	1	1	A0A6I4SMS1	na	na	A0A6I4SKZ9	A0A6I4SL52	A0A6I4SKP3	A0A6I4SN38	A0A6I4SMX2	A0A6I4SLY8	na	na	na	na	na	A0A6I4SQ28
1028745	1	2	0	1	1	1	A0A8J6Q833	na	A0A8J6Q6D7	A0A8J6QK37	na	na	A0A8J6UGC6	A0A8J6QGB9	A0A8J6QHS9	na	na	na	na	na	A0A8J6QX69
1028746	1	2	0	1	1	1	A0A7K1LPG6	na	A0A7K1LRK1	A0A7M3SYA8	na	na	A0A7M3SYR8	A0A7K1LMB9	A0A7K1LMW9	na	na	na	na	na	A0A7K1LMS2
1028752	1	3	1	1	1	1	A0A6G9QFE3	na	A0A6G9QIP2	A0A6G9QK51	A0A6G9QJ64	A0A6G9QKB1	A0A6G9QKI1	A0A6G9QLW6	A0A6G9QLJ3	na	na	na	na	na	A0A6G9QQ47
1028800	1	2	1	1	1	1	A0A068SP86	na	A0A068SV85	na	A0A068SVV6	A0A068SR03	A0A068SSG2	A0A068SQ51	A0A068SZM3	na	A0A068SJR2	na	na	na	A0A068SXD8
1028801	1	2	1	1	1	1	A0A068T9X4	na	A0A068TCT1	na	A0A068TA48	A0A068TC53	A0A068T9U1	A0A068T7Q0	A0A068TF98	na	A0A068T2Y2	na	na	na	A0A068TBL8
1028803	1	0	1	1	1	1	F9GPP7	na	na	na	na	F9GPN1	F9GNQ4	F9GNP1	na	F9GNW6	F9GRA1	na	na	na	F9GNU0
1028804	1	0	1	1	1	1	F9GWL7	na	na	na	na	F9GSI6	F9GTL5	F9GTL6	na	F9GTE3	na	na	na	na	F9GTI4
102891	1	2	0	0	0	0	A0A0Q0Y0S7	na	A0A0Q0XM95	A0A0N8WIS0	na	na	na	na	na	na	na	na	na	na	na
102897	1	0	0	0	0	0	D3D5R8	na	na	na	na	na	na	na	na	na	na	na	na	na	na
1028989	1	3	1	1	1	1	A0A077LI01	na	A0A077LSD5	A0A077LQ34	A0A077LHG2	A0A077LK75	A0A077LE40	A0A077LHD8	A0A077LMK4	na	A0A077LKU5	na	na	na	na
1029718	0	0	0	1	0	1	na	na	na	na	na	na	F9VKH8	na	F9VLR1	na	na	na	F9VJ77	na	F9VLA4
1029756	1	3	1	1	1	1	V5SBV7	na	V5SFQ8	V5SFI5	V5SE88	V5SE45	V5SF23	V5SFB2	V5SAZ5	na	na	na	na	na	na
1029822	0	0	0	1	1	1	na	na	na	na	na	na	F5VCS6	F5VCS5	na	F5VGG5	F5VD74	na	F5VBF9	F5VD21	na
1030009	1	0	0	1	1	1	A0A0E0UXG7	na	na	na	na	na	A0A0E0UW83	A0A0E0UVZ0	A0A0E0UVH9	na	na	na	A0A0E0UW42	A0A0E0UUW9	na
1030092	1	3	1	1	1	1	A0A366GIK5	na	A0A366GI24	A0A366GI28	A0A366GI26	A0A366GKJ2	A0A366GVP7	A0A366GUC7	A0A366G526	na	A0A366G2X4	na	A0A366GIH4	A0A366GIT9	na
1030157	1	2	1	1	1	1	A0A1X9YC42	na	na	A0A1X9YEF6	A0A1X9YEI3	A0A1X9YGQ3	A0A1X9YEP4	A0A1X9YL29	A0A1X9YH77	na	na	na	na	na	A0A1X9YKC5
1030841	1	3	1	1	1	1	na	G4CNL9	G4CSP7	G4CSP6	G4CSP9	G4CTL6	G4CQG1	G4CQK3	na	G4CRW9	G4CRK9	na	na	na	G4CTL7
1031	1	0	0	0	0	0	A0A2G6HR81	na	na	na	na	na	na	na	na	na	na	na	na	na	A0A2G6HQ24
1031224	1	2	0	1	1	1	A0A6N8J240	na	A0A6N8J4T5	A0A6N8J2Q0	na	na	A0A6N8J4X7	A0A6N8J8C0	A0A6N8JGJ2	na	na	na	na	na	A0A6N8JAA8
1031537	1	3	1	1	1	1	na	A0A368KPP2	A0A368KQL2	A0A368KU97	A0A368KJG9	A0A368KUP5	A0A368KM83	A0A368KVG9	A0A368KXN3	na	A0A368KTA4	na	na	na	na
1031538	2	3	1	1	1	1	A0A5P1R7S5	A0A5P1RAV0	A0A5P1RE79	A0A5P1RC37	A0A5P1RBD0	A0A5P1RDG2	A0A5P1RFN8	A0A5P1RDZ3	A0A5P1RDE9	na	na	na	na	na	na
1031541	1	0	0	1	1	1	na	A0A239FN56	na	na	na	na	A0A239DDZ6	A0A239GP23	A0A239J4A8	na	A0A239EKV1	na	na	na	A0A239KW22
1031542	1	3	1	1	1	1	A0A5C7E3A1	na	A0A5C7E4B7	A0A5C7E1L0	A0A5C7DSP4	A0A5C8KYT7	A0A5C7E5L9	A0A5C7DQE9	na	A0A5C7DVB3	A0A5C7DVI1	na	na	na	na
1031564	1	3	1	1	1	1	A0A0A8H2L3	na	A0A0A8H5X1	A0A0A8H3S7	A0A0A8H0W9	A0A0A8GZF4	A0A0A8H019	A0A0A8H0B4	na	A0A0A8H2T9	na	na	na	na	na
1031594	1	1	1	1	1	1	A0A369AR34	na	na	na	A0A369AHB1	A0A369AS36	A0A369AJ63	A0A369AIT0	A0A369AL25	na	na	na	na	na	na
1031711	1	3	1	1	1	1	na	F6FZE3	F6G1R9	F6G1S0	F6G4W4	F6G5D9	F6FYK9	F6FYL0	F6FYX9	na	F6G8P5	na	na	na	F6G582
1031753	1	3	1	1	1	1	A0A1X9SKY1	na	A0A1X9SPI4	A0A1X9SPD4	A0A1X9SNA0	A0A1X9SKP2	A0A1X9SMR4	A0A1X9SNG7	na	A0A1X9SL90	na	na	na	na	na
1032	2	3	1	1	1	1	A0A432UUM7	A0A432UY60	A0A432UYE2	A0A432UV00	A0A432UUW5	A0A5C7QKV8	A0A5C7RK57	A0A432UUS0	A0A432URN2	na	A0A5C7QTQ6	na	na	na	A0A5C7RKP0
1032067	1	3	1	1	1	1	A0A6G5QEW8	na	A0A6G5QE30	A0A6G5QEC6	A0A6G5QGJ3	A0A6G5QDW8	A0A6G5QHI3	A0A6G5QHH6	na	A0A6G5QE09	na	na	na	na	na
1032069	1	3	1	1	1	1	A0A0K1HHT4	na	A0A0K1HI25	A0A0K1HHJ7	A0A0K1HEV1	A0A0K1HD11	A0A0K1HF45	A0A0K1HFG8	na	A0A0K1HD85	na	na	na	na	na
1032070	1	3	1	1	1	1	A0A5B7XBV0	na	A0A5B7XBQ6	A0A5B7XCP0	A0A5B7XC89	A0A5B7XBM2	A0A5B7XBK9	A0A5B7XC49	na	A0A5B7XBC7	na	na	na	na	na
1032071	1	3	1	1	1	1	A0A494TB67	na	A0A494T2I0	A0A494T0T9	A0A494TA33	A0A494T9H0	A0A494T0G8	A0A494TCK1	na	A0A494TB76	na	na	na	na	na
1032238	1	3	1	1	1	1	A0A345J768	na	A0A345J2E1	A0A345J2E0	A0A345J2E2	A0A345J1F7	A0A345J864	A0A345J5W8	na	A0A345J8Q3	na	na	na	na	na
1032239	1	3	1	1	1	1	A0A4Q0UCL4	na	A0A4Q0UG80	A0A4Q0UG17	A0A4Q0UFJ1	A0A4V1LB81	A0A4Q0UFN7	A0A4Q0UDK0	na	A0A4Q0UBT0	na	na	na	na	na
1032241	1	3	1	1	1	1	A0A4Q0ZYP1	na	A0A4Q0ZX67	A0A4Q1A6W1	A0A4Q1A4Z4	A0A4Q0ZZ23	A0A4Q0ZYL3	A0A4Q0ZXX5	na	A0A4V1LWY6	na	na	na	na	na
1032243	1	3	1	1	1	1	A0A6G5QWY4	na	A0A6G5QWS2	A0A6G5QX35	A0A6G5QXE5	A0A6G5QW26	A0A6G5QZ03	A0A6G5QY54	na	A0A6G5QWJ5	na	na	na	na	na
103232	1	2	0	0	1	0	A0A540PL49	na	A0A540Q019	na	A0A540PMS5	na	na	A0A540P700	na	na	A0A540P0N4	na	na	na	A0A540QCX0
1032476	1	0	0	0	1	0	A0A7W0CJ39	na	na	na	na	na	na	A0A7W0CHL9	na	na	A0A7W0CMH1	na	na	na	na
1032480	1	2	0	1	1	0	F5XFC2	na	F5XHJ3	na	F5XIP1	na	F5XMH3	F5XL99	na	na	F5XQ68	na	na	na	F5XIP2
1032488	1	3	1	1	1	1	na	G4CGS8	G4CF31	G4CF30	G4CF32	G4CJM5	G4CGX3	G4CGT3	na	G4CFS8	na	na	na	na	G4CJM7
1032505	1	0	0	1	1	1	X8I582	na	na	na	na	na	X8HZ81	X8I4I4	na	X8I0A5	na	na	na	na	X8HN15
1032623	1	3	1	1	1	1	A0A420XJC8	na	A0A420XGK3	A0A420XH27	A0A420XGU0	A0A420XIM7	A0A420XIZ6	A0A420XIB5	na	A0A420XF41	na	na	na	na	A0A420XG14
1032851	1	0	0	0	0	0	A0A3D4SYS1	na	na	na	na	na	na	na	na	na	A0A3D4SYC2	na	na	na	na
1032868	0	2	0	0	0	1	na	na	J6CV46	na	J4SPR6	na	na	na	na	J5KZZ8	J5KFZ1	na	na	na	J4SG95
1033177	1	0	0	1	1	0	G7XMJ4	na	na	na	na	na	G7XK10	G7X7C7	na	na	G7X956	G7XB29	na	na	na
103349	0	0	0	1	0	0	na	na	na	na	na	na	A0AA38YNU2	na	na	na	na	A0AA39D474	na	na	na
103372	1	1	0	1	0	0	F4WHI9	na	F4X4T9	na	na	na	F4W4F1	na	na	na	na	F4WUX4	na	na	na
1033731	1	2	0	1	1	1	A0A1H4BBI9	na	A0A1H4BA86	A0A1H4F8B4	na	na	A0A1H4B0K3	A0A1H4C1U7	A0A1H4FGS8	na	na	na	na	na	na
1033734	1	3	1	1	1	1	A0A4S3PNA7	na	A0A4S3PJ58	A0A4S3PJN2	A0A4S3PML0	A0A4S3PMD6	A0A4S3PZN8	A0A4S3PS44	A0A4S3PNH3	na	A0A4S3PQJ4	na	A0A4S3PQ47	na	A0A4S3PMA6
1033736	1	0	0	0	0	0	A0A921SMP5	na	na	na	na	na	na	na	na	na	na	na	na	na	A0A921ME36
1033802	0	3	1	1	1	1	na	na	U2EHT2	U2FZA9	F7QBJ1	U2EL73	U2ESP1	U2FRR8	na	U2EL39	na	na	na	na	U2E0Z4
1033806	0	0	0	0	0	0	na	na	na	na	na	na	na	na	na	na	na	na	na	na	F7PJ64
1033810	0	0	1	1	1	1	na	na	na	na	na	F7Q132	F7PX10	F7PX09	U2EDD8	na	na	na	U2E9N7	na	F7PWX2
1033846	1	3	1	1	1	1	A0A1E3CE77	na	A0A1E3CBB3	A0A1E3CEH7	A0A1E3CEX3	A0A1E3C595	A0A1E3C5A2	A0A1E3C5A1	A0A1E3CAD5	na	na	na	na	na	na
1033900	1	2	0	1	1	1	A0A2N0XI01	na	A0A2N0XE49	A0A2N0XBM3	na	na	A0A2N0XHH5	A0A2N0XDF7	A0A2N0XG93	na	na	na	na	na	na
1033975	1	1	0	0	0	0	A0A0J9VDR8	na	A0A0J9SU47	na	na	na	na	na	na	na	na	na	na	na	na
1034015	1	3	0	0	0	0	A0A977IGU6	na	A0A977IDI5	A0A977IGT9	A0A977NNF6	na	na	na	na	na	na	na	na	na	na
1034303	1	0	0	1	0	0	A0A5N6WK89	na	na	na	na	na	A0A5N6WZV5	na	na	na	A0A5N6WNZ4	A0A5N6XKR0	na	na	na
1034304	1	0	0	1	0	0	A0A5N6VPT1	na	na	na	na	na	A0A5N6VJ00	na	na	na	A0A5N6VLY8	A0A5N6W6F0	na	na	na
1034346	0	0	0	1	1	1	na	na	na	na	na	na	A0A2V2EW39	A0A318KVQ7	na	A0A318KTK4	A0A318KM53	na	A0A2V2F8E2	A0A2V2FT08	na
1034471	1	3	1	1	1	2	A0A2D0KD61	na	A0A2D0KE90	A0A2D0KEL2	A0A2D0KI18	A0A2D0KES6	A0A2D0KIS9	A0A2D0KI73	A0A2D0KFW1	A0A2D0KDH7	A0A2D0KHW8	na	na	na	A0A2D0KFC6
1034604	1	0	0	0	0	0	A0A7S0S104	na	na	na	na	na	na	na	na	na	A0A7S0NAZ7	A0A7S0S0L9	na	na	na
1034807	1	2	0	1	1	1	G2Z1C9	na	G2Z6J0	G2YZU9	na	na	G2Z0I5	G2Z083	G2Z4J9	na	na	na	na	na	G2Z523
1034831	1	0	0	0	0	1	A0A7S2SXJ0	na	na	na	na	na	na	na	A0A7S2RQH9	na	A0A7S2RTP6	na	na	na	na
1034889	1	3	1	1	1	1	A0A1C6PQ07	na	A0A1C6NQK2	A0A1C6NR94	A0A1C6PL20	A0A1C6PAV8	A0A1C6NU47	A0A1C6NU31	A0A1C6PZA2	na	A0A1C6MD33	na	na	na	na
1034943	1	3	1	1	1	1	A0A078KS91	na	A0A078KWF6	A0A078L1C3	A0A078KXA7	A0A078KWM9	A0A078L1M4	A0A078KZ95	na	A0A078L1Q6	A0A078KWJ4	na	na	na	A0A078KPI6
1035	1	3	1	1	1	1	A0A090MPJ0	na	A0A090ML43	A0A090N7P1	A0A090MKU4	A0A090MQP5	A0A090MKN6	A0A090MKJ8	na	A0A090N7H8	na	na	na	na	na
1035067	0	0	0	1	0	0	na	na	na	na	na	na	A0A9X1A7G1	na	na	na	na	na	na	na	na
1035184	0	0	0	1	1	1	na	na	na	na	na	na	F9PA54	F9P521	na	F9P7V5	na	na	F9P5L2	F9P5W9	na
1035185	1	0	0	1	1	1	F9M4W3	na	na	na	na	na	F9M077	F9M1C9	F9M421	na	na	na	F9M1J9	F9M248	na
1035187	1	3	1	1	1	1	F9MLJ5	na	F9MIX2	F9MIX1	F9MIX3	F9MIX0	F9MIP3	F9MH93	na	F9ML75	na	na	F9MK00	F9MKJ7	na
1035188	1	3	1	1	1	1	F9Q5Q4	na	F9Q7R5	F9Q7R6	F9Q7R4	F9QBJ9	F9QBE2	F9QBE4	na	F9Q6J5	na	na	na	na	F9QAC3
1035189	1	0	0	0	1	1	F9PZC0	na	na	na	na	na	na	F9PX46	na	F9PXB4	na	na	na	F9PUV9	na
1035190	1	3	1	1	1	1	F9Q0F4	na	F9Q3X1	F9Q3X0	F9Q3X2	F9Q3W9	F9PZU7	F9Q4G4	na	F9PZY1	na	na	F9Q0A1	F9Q1F5	na
1035193	1	2	0	1	1	1	L1Q024	na	L1P8G9	L1Q1Y9	na	na	L1PCU7	L1PMX3	na	L1PU13	na	na	na	na	na
1035195	1	0	0	1	0	0	L1M9C4	na	na	na	na	na	L1MDA2	na	na	na	L1M9L7	na	na	na	L1MCH9
1035197	1	1	1	1	1	1	L1MCF7	na	na	na	L1MS11	L1MS25	L1MBQ1	L1MCR8	L1MK33	na	na	na	na	na	L1MS16
1035309	1	0	0	1	0	0	A0A2C5X1M2	na	na	na	na	na	A0A2C5X3D7	na	na	na	A0A2C5WBX3	A0A2C5WX96	na	na	na
1035514	1	1	0	0	0	0	A0A0J9TPW9	na	A0A0J9WCS0	na	na	na	na	na	na	na	na	na	na	na	na
1035515	1	1	0	0	0	0	A0A0J9VS47	na	A0A0J9TBI9	na	na	na	na	na	na	na	na	na	na	na	na
1035707	1	3	1	1	1	1	A0A1I7LV75	na	A0A1I7M648	A0A1I7M5L4	A0A1I7IG79	A0A1I7KCY3	A0A1I7L9Q9	A0A1I7LA54	A0A1I7FVR9	na	A0A1I7K8Q1	na	na	na	na
1035817	1	0	0	1	0	0	F8ASZ7	na	na	na	na	na	F8AUJ9	na	na	na	F8AT83	na	F8AU03	na	na
103600	1	1	0	0	0	0	A0A484GUS2	na	A0A484GGX3	na	na	na	na	na	na	na	na	na	na	na	na
1036020	1	1	0	0	1	0	A0A7W4VRM5	na	A0A7W4Z245	na	na	na	na	A0A7W4VZU1	na	na	A0A7W4Z001	na	na	na	na
1036172	1	3	1	0	1	1	S5PR49	na	S5PS22	S5PEC1	S5P7Q8	S5P8L3	na	S5P5C9	na	S5PSL6	na	na	na	na	na
1036180	1	3	1	1	1	1	A0A562QV26	na	A0A562RJT2	A0A562RKR1	A0A562QWH1	A0A562QWN5	A0A562QXE6	A0A562QXA7	A0A562R7A9	na	na	na	na	na	na
1036181	1	0	0	0	0	0	A0A1H8Z9K7	na	na	na	na	na	na	na	na	na	A0A1H8ZZH7	na	na	na	na
1036182	1	1	0	0	1	0	A0A285EZ44	na	A0A285J5Q1	na	na	na	na	A0A285KFI8	na	na	A0A285GKR1	na	na	na	na
103621	1	0	0	0	0	0	A0A2I1KSU0	na	na	na	na	na	na	na	na	na	na	na	na	na	na
1036611	1	0	0	1	0	0	A0A1L9PLG0	na	na	na	na	na	A0A1L9PZC6	na	na	na	A0A1L9P753	A0A1L9PB28	na	na	na
1036612	1	0	0	1	0	0	A0A1L9T347	na	na	na	na	na	A0A1L9T8I4	na	na	na	A0A1L9T9S4	A0A1L9TYZ8	na	na	na
1036672	1	2	1	1	1	1	I3UDJ6	na	I3UDX5	na	I3UGG9	I3UGQ1	I3UA17	I3UA18	na	I3UCH6	na	na	na	na	I3UBV3
1036673	1	3	1	1	1	1	F8FQ24	na	F8FPI7	F8FPI8	F8FPI9	F8FIL7	F8FMX4	F8FMX5	F8FQ20	na	F8FQQ2	na	F8FRF1	na	na
1036674	1	3	1	1	1	2	na	F7RZA4	F7RWU4	F7RVA0	F7RV99	F7RXA6	F7RYD0	F7RYD1	F7S0K3	F7RV86	na	na	na	na	na
1036679	0	3	0	0	0	1	na	na	A0A2A2HZ89	A0A2A2HZ51	A0A2A2HZD4	na	na	na	A0A2A2HQX2	na	na	na	na	na	na
1036723	1	1	0	0	0	0	A0A024V5Z2	na	A0A024V9C6	na	na	na	na	na	na	na	na	na	na	na	na
1036724	1	1	0	0	0	0	A0A024VMT3	na	A0A024VUM9	na	na	na	na	na	na	na	na	na	na	na	na
1036725	1	1	0	0	0	0	A0A024W5M0	na	A0A024WAC8	na	na	na	na	na	na	na	na	na	na	na	na
1036726	1	1	0	0	0	0	W4I7L8	na	W4IK76	na	na	na	na	na	na	na	na	na	na	na	na
1036727	1	1	0	0	0	0	A0A024WNI0	na	A0A024WTB1	na	na	na	na	na	na	na	na	na	na	na	na
1036778	1	2	1	1	1	1	A0A1H5Y2Q9	na	A0A1H6BCJ1	na	A0A1H6BBA5	A0A1H5W4N8	A0A1H5W484	A0A1H5VWK5	A0A1H6D284	na	A0A1H5ZCS7	na	na	na	A0A1H6BAT8
1036779	1	2	1	1	1	1	A0A1H7HZY3	na	A0A1H7VUB6	na	A0A1H7VW27	A0A1H7H4B0	A0A1H7H2J5	A0A1H7H0E2	A0A1H7P316	na	A0A1H7QK76	na	na	na	A0A1H7VUR0
1036808	1	0	0	1	0	0	A0A0C3A299	na	na	na	na	na	A0A0C3EAL0	na	na	na	A0A0C2ZA58	A0A0C2YXZ5	na	na	na
103690	1	3	1	1	1	1	Q8YLL1	na	Q8YNL1	Q8YPN2	Q8YM45	Q8YXQ0	Q8YVT9	Q8YW18	Q8YMJ0	na	Q8YS07	na	na	na	na
103695	1	1	0	1	0	0	A0A6J0SEY1	na	A0A6J0TK84	na	na	na	A0A6J0TGD7	na	na	na	na	A0A6J0V8C1	na	na	na
103721	0	0	0	0	0	0	na	na	na	na	na	na	na	na	na	na	na	na	A0AA45R7I4	na	na
103725	1	3	0	0	1	0	A0A7W9KND9	na	A0A7W9NFR8	A0A7W9NGN2	A0A7W9KGQ8	na	na	A0A7W9NK91	na	na	A0A7W9KEQ2	na	na	na	A0A7W9KG29
103733	1	1	0	0	0	0	A0A5Q0H201	na	A0A5Q0HCK5	na	na	na	na	na	na	na	A0A5Q0GW71	na	na	na	na
103734	1	1	0	0	0	0	A0A3N1H8T6	na	A0A3N1H6Q2	na	na	na	na	na	na	na	A0A3N1HDF3	na	na	na	na
1037355	1	0	1	1	1	1	A0A1T5A2A0	na	na	na	na	A0A1T5CNM5	A0A1T5BXF7	A0A1T5D547	A0A1T5A7D1	na	na	na	na	na	A0A1T5CNT0
1037362	1	3	1	1	1	1	na	A0A238JB34	A0A238JF20	A0A238JEX5	A0A238JEY8	A0A238JEX1	A0A238JCS8	A0A238JG94	A0A238J934	na	A0A238JDM5	na	na	na	A0A238J7N5
1037377	1	2	0	1	1	2	A0A316X1N5	na	A0A316WJY6	A0A316WEW9	na	na	A0A316X3Q8	A0A316WS66	A0A316WF45	A0A316WHN3	na	na	na	na	na
103762	1	0	0	1	0	0	A0A8J5RDL4	na	na	na	na	na	A0A8J5VUZ5	na	na	na	A0A8J5RJA6	A0A8J5SPZ5	na	na	na
1037660	1	0	0	0	0	0	A0A066V9Y3	na	na	na	na	na	na	na	na	na	A0A066W146	A0A066VBH4	na	na	na
1037680	1	3	1	1	1	1	A0A4U1D2P7	na	A0A4U1D2E2	A0A4U1DAL7	A0A4U1D9A3	A0A4U1D8V0	A0A4U1DBU7	A0A4U1DDJ3	A0A4U1D5Z8	na	A0A4U1CZ56	na	A0A4U1CYB5	na	A0A4U1DE09
103775	1	1	0	1	0	0	A0A9P9YH92	na	A0A9P9YTZ9	na	na	na	A0A9Q0BT37	na	na	na	na	A0A9P9YHY8	na	na	na
1037889	1	3	1	1	1	1	na	A0A921TAY1	A0A921TB99	A0A921TE86	A0A921TCI2	A0A921TC21	A0A921NT31	A0A921TGN8	A0A921NR51	na	A0A921P1F3	na	na	na	na
103796	2	3	1	1	1	1	A0A0K8LX90	A0A2G9L1V9	A0A2G9KZ62	A0A0K8M7X2	A0A2G9KTZ9	A0A2G9L417	A0A2G5QAE3	A0A0K8M6T2	A0A2G9LA31	na	A0A2G9KZ84	na	na	na	na
1038014	1	2	0	1	1	1	A0A1H7FFD1	na	A0A1H7K9U5	A0A1H7WEP0	na	na	A0A1H7TJN6	A0A1H7MLL5	A0A1H7N9E3	na	na	na	na	na	A0A1H7N1T6
103808	1	0	0	1	0	0	A0A0D8HRK2	na	na	na	na	na	A0A0D8I582	na	na	na	A0A0D8HYB3	na	na	na	A0A0D8I4M0
103816	1	0	0	1	0	0	A0A7M2XNB3	na	na	na	na	na	A0A7M2XMP8	na	na	na	A0A7M2XL36	na	na	na	A0A495NHK5
103817	1	0	0	0	0	0	A0A3D1L7Z6	na	na	na	na	na	na	na	na	na	na	na	na	na	na
103827	1	1	0	1	0	0	A0A0N5CT89	na	A0A0N5D9I0	na	na	na	A0A0N5CY39	na	na	na	na	A0A0N5CV55	na	na	na
103836	1	1	0	0	0	0	A0A543J3V9	na	A0A543IYN2	na	na	na	na	na	na	na	A0A543J3R2	na	na	na	na
103838	1	1	0	0	1	0	A0A5S4F7M2	na	A0A5S4F289	na	na	na	na	A0A5S4EYC6	na	na	A0A5S4F0H8	na	na	na	A0A5S4F9W1
103855	1	3	1	1	1	1	na	A0A0H4WFA7	A0A0H4WJG3	A0A0H4WD04	A0A0H4VT75	A0A0H4W1V6	A0A0H4W211	A0A0H4WVU7	na	A0A0H4WFA5	na	na	na	na	A0A0H4WH60
1038845	1	2	0	1	1	1	A0A6N8HD46	na	A0A6N8HAD0	A0A6N8HDP7	na	na	A0A6N8HAT3	A0A6N8H7M7	A0A6N8HAX8	na	na	na	na	na	A0A6N8HG78
1038856	1	3	1	1	1	1	A0A1C7ED52	na	A0A1C7E5Y1	A0A1C7E546	A0A1C7E5U4	A0A1C7EBJ5	A0A1C7E6W8	A0A1C7ECA9	A0A1C7E4G4	na	A0A1C7EBI5	na	A0A1C7E797	na	A0A1C7E741
1038857	1	1	0	1	0	0	A0A6N8GLM1	na	A0A6N8GQ30	na	na	na	A0A6N8GUQ0	na	na	na	na	na	na	na	A0A6N8GT98
103891	1	3	1	1	1	1	A0A380NJN1	na	A0A380NM76	A0A380NNK2	A0A380NLW6	A0A380NMM0	A0A380NL10	A0A380NJ74	A0A380NLG6	na	na	na	A0A380NIE8	A0A380NPK4	na
103892	1	2	1	1	1	1	A0A6N3DHR7	na	A0A6N3A9F8	na	A0A6N2ZA32	A0A6N3ET82	A0A6N2ZNR8	A0A6N2ZMX4	A0A6N2YMB3	na	na	na	A0A6N3CI00	A0A6N3ELX2	na
1038922	2	3	1	1	1	1	J2EY23	J2E6L9	J2F542	J2F5Q4	J2Y7V0	J2EHH9	J2EK81	J2MVE2	J2Y7M8	na	J2Y9E0	na	na	na	J2YB59
1038923	2	3	1	0	1	1	I4JY88	I4KLS3	I4KPM7	I4JZD1	I4K0E6	I4KLE2	na	I4KZ76	I4KZ60	na	I4KPW7	na	na	na	na
1038928	1	1	0	0	0	0	A0A3R7FTX8	na	A0A420V9C9	na	na	na	na	na	na	na	A0A420UTD6	na	A0A3R7LRZ3	na	na
103933	1	1	0	1	0	0	A0A6P8LNS7	na	A0A6P8MWT6	na	na	na	A0A6P8MUP9	na	na	na	na	A0A6P8MAD9	na	na	na
103954	1	1	0	0	0	0	A0A851LQ77	na	A0A851LBM6	na	na	na	na	na	na	na	na	A0A851LYC9	na	na	na
103956	0	0	0	0	0	0	na	na	na	na	na	na	na	na	na	na	na	A0A7L0FY01	na	na	na
103985	2	3	1	1	1	1	A0A0Q0FUC4	A0A3M5MS19	A0A3M5N154	A0A3M5N5H4	A0A0Q0ESV8	A0A0Q0E656	A0A0N8TL20	A0A0Q0GDK2	A0A0Q0FX22	na	A0A0Q0F1G2	na	na	na	na
104087	2	3	1	1	1	1	A0A0B1YS00	A0A0B1Z087	A0A0B1YXT4	A0A0B1YZB6	A0A0B1Z0N4	A0A0B1Z9N2	A0A0B1Z3U1	A0A0B1YYS9	A0A0B1Z309	na	A0A0B1YWJ9	na	na	na	A0A1H5GR03
1040964	0	0	0	1	1	1	na	na	na	na	na	na	F7QZ69	F7QZ70	na	F7R1D3	F7QYG0	na	F7QYI0	F7R138	na
104097	1	3	1	1	1	1	A0A967B5G5	na	A0A967BC90	A0A967B7C4	A0A967BB03	A0A967EDU1	A0A967B7N3	A0A967ED67	A0A967B4N0	na	A0A967B9L8	na	na	na	na
1040979	2	3	1	1	1	1	A0A375HRD6	A0A375HAW2	A0A375H9I8	A0A375H9Q6	A0A375HBR6	A0A375H1B8	A0A375HCK4	A0A375HCA7	A0A375H681	na	na	na	na	na	A0A375GZN7
104098	1	3	1	1	1	1	A0A4Y3TST3	na	A0A4Y3TUA0	A0A4Y3TRX8	A0A4Y3TNG3	A0A4Y3TWA4	A0A4Y3TVK5	A0A4Y3TW89	A0A4Y3TX84	na	na	na	na	na	na
104099	1	3	1	1	1	1	A0A4Y3TN74	na	A0A4Y3TL32	A0A4Y3TIQ8	A0A4Y3TJL1	A0A4Y3TQP8	A0A4Y3TR62	A0A4Y3TPV7	A0A4Y3TKI3	na	A0A4Y3TLZ0	na	na	na	na
104100	1	3	1	1	1	1	A0A841QE97	na	A0A841QA48	A0A841QBK8	A0A841QAX4	A0A841QEU6	A0A841QGZ7	A0A841QGK1	A0A841QFF7	na	na	na	na	na	na
104101	1	3	1	1	1	2	A0A252AYU3	na	A0A252AVB8	A0A252AV34	A0A252AVI8	A0A252AWS0	A0A252ATE1	A0A6N3T6Q8	A0A252ATG8	A0A252AR10	A0A252AET8	na	na	na	na
1041015	1	1	0	1	0	0	A0A6P4FKT8	na	A0A6P4FJI6	na	na	na	A0A6P4E262	na	na	na	A0A6P4FD16	A0A6P4FZZ8	na	na	na
104102	1	3	1	1	1	2	A0A094YP85	na	A0A094ZFH1	A0A095AX61	A0A094YJ14	A0A094ZJF3	A0A094YJJ7	A0A095AVJ9	A0A094YFJ1	A0A252A1X0	A0A094YWY9	na	na	na	na
1041138	1	3	1	1	1	1	A0A0B4X2F1	na	A0A0B4XDX6	A0A0B4XHK4	A0A0B4XI10	A0A0B4X659	A0A0B4X245	A0A0B4X3C8	A0A0B4WYP6	na	A0A0B4WXR9	na	na	na	A0A0B4X8U9
1041504	0	0	0	1	1	1	na	na	na	na	na	na	G2IHL0	G2IHL1	G2IEX5	na	na	na	G2IES9	na	G2IEI1
1041521	0	0	0	1	1	1	na	na	na	na	na	na	F7QSK8	F7QSK7	na	F7QWV9	F7QTG4	na	F7QTC0	F7QTL9	na
1041522	1	0	0	0	0	0	J4TI31	na	na	na	na	na	na	na	na	na	J5EE22	na	na	na	na
1041766	1	2	0	1	1	1	na	A0A5E6MLN3	A0A5E6MPV7	A0A5E6MJF0	na	na	A0A5E6ME42	A0A5E6ME59	na	A0A5E6M962	na	na	na	na	na
1041768	1	2	0	1	1	1	na	A0A5E6MCU3	A0A5E6MG99	A0A5E6MQ74	na	na	A0A5E6MJT2	A0A5E6MC33	na	A0A5E6MD39	na	na	na	na	na
1041826	1	2	0	1	1	1	G8X9Y6	na	G8X6H0	G8X5T9	na	na	G8X7G6	G8X5B5	G8X5M6	na	na	na	na	na	G8X561
1041930	0	3	0	0	0	0	na	na	H8I7Q3	H8I7Q2	H8I7Q0	na	na	na	na	na	na	na	na	na	na
1042	1	3	1	1	1	1	A0A2D8MGH5	na	A0A2D8MEX6	A0A2D8MEY5	A0A2D8MEX3	A0A2D8M9E9	A0A2D8MKW3	A0A2D8MKY2	A0A2D8M7R1	na	A0A922WTU7	na	na	na	A0A2D5F4C2
104205	1	1	0	0	0	0	A0A841E9N3	na	A0A841EBZ6	na	na	na	na	na	na	na	A0A841EGJ3	na	na	na	na
1042133	1	0	0	0	0	0	A0A9P8D3P1	na	na	na	na	na	na	na	na	na	A0A9P8DSI5	A0A9P8DFM8	na	na	na
1042156	1	3	1	1	1	1	F7V6M9	na	F7V6N1	F7V6N0	F7V6M8	F7V6M7	F7V5X1	F7V6I7	na	F7V6K3	na	na	na	na	na
1042160	1	1	0	1	1	0	G0M580	na	G0M4B7	na	na	na	G0M186	G0M187	na	na	G0LZ39	na	G0LZM4	G0M3B4	na
1042163	1	3	1	1	1	1	A0A075R404	na	A0A075QX61	A0A075R193	A0A075R0L7	A0A075QZH8	A0A075R7R3	A0A075R161	A0A075QZT6	na	A0A075R0H0	na	A0A075R0W6	na	A0A075R6D0
1042209	2	3	1	1	1	1	A0A010RR79	A0A010T2A0	A0A010SU56	A0A010RP03	A0A010RRL0	A0A010S0Z9	A0A010S899	A0A010T151	A0A010TD16	na	A0A010S177	na	na	na	A0A010SQ91
1042311	1	0	0	1	0	0	A0A2T3ZCL7	na	na	na	na	na	A0A2T3ZA20	na	na	na	A0A2T3YRB5	A0A2T3ZQD0	na	na	na
1042400	0	0	0	0	0	0	na	na	na	na	na	na	na	na	na	na	G6F537	na	G6F4X2	na	na
1042402	1	0	0	0	1	1	G6FEU0	na	na	na	na	na	na	G6FC58	na	G6FFH5	na	na	na	G6FFQ0	na
1042403	0	0	0	1	0	0	na	na	na	na	na	na	A0A806FP09	na	na	na	A0A806FKS2	na	na	na	na
1042404	1	3	1	0	0	1	G6EN45	na	G6ENK5	G6ENK4	G6ENK6	G6ENK3	na	na	G6ELT8	na	na	na	na	G6EM65	na
1042417	0	0	0	1	1	1	na	na	na	na	na	na	A0A3B6VZT9	A0A3B6VQQ0	na	A0A3B6W186	na	na	na	na	A0A3B6W1X8
1042418	0	0	0	1	1	1	na	na	na	na	na	na	A0A2N5RDM0	A0A2N5RST8	na	A0A2N5RIW5	A0A2N5RSL8	na	A0A2N5RCG3	na	A0A2N5RT48
104259	1	0	0	1	0	0	A0A0F7TUR5	na	na	na	na	na	A0A0F7TEU0	na	na	na	A0A0F7TCY8	A0A0F7TMU0	na	na	na
104268	1	2	0	1	1	1	A0A1M5D2F5	na	A0A1M5D2P2	A0A1M5F6B4	na	na	A0A1M5F803	A0A1M5CS66	A0A1M5DG72	na	na	na	na	na	A0A1M5GSD0
1042876	2	3	1	1	1	1	F8G4J1	F8G0X6	F8FYQ3	F8FZA9	F8FZA8	F8FUR7	F8FVS5	F8FVS4	F8FTY3	na	F8G053	na	na	na	F8FYL9
1042877	0	3	0	0	0	0	na	na	G0HJW8	G0HMP1	G0HK30	na	na	na	na	na	na	na	na	na	na
1042878	2	3	1	1	1	2	F8GRM3	F8GWR4	G0EXN5	G0EXN6	G0ET38	G0EVA7	G0EVV4	G0EVV3	G0EWR4	F8GV42	na	na	na	na	G0EVH7
1042984	1	2	0	0	0	0	A0A7W9QFN0	na	A0A7W9V1W4	A0A7W9V0Z8	na	na	na	na	na	na	na	na	A0A7W9Q628	na	na
1043002	1	0	0	1	0	0	A0A074XM63	na	na	na	na	na	A0A074WZK0	na	na	na	A0A074XAJ5	A0A074XUZ6	na	na	na
1043003	1	0	0	1	0	0	A0A074VGR8	na	na	na	na	na	A0A074VNN3	na	na	na	A0A074VV79	A0A074WV13	na	na	na
1043004	1	0	0	1	0	0	A0A074WP07	na	na	na	na	na	A0A074WQ09	na	na	na	A0A074WKL6	A0A074WHY1	na	na	na
1043005	1	0	0	0	0	0	A0A074YBQ2	na	na	na	na	na	na	na	na	na	A0A074YEE6	A0A074YMT6	na	na	na
1043206	1	3	1	1	1	1	F7S7Z2	na	F7S5Z2	F7S5Z3	F7S6S6	F7S806	F7S807	F7S808	F7S805	na	na	na	na	na	na
104336	1	0	0	0	0	0	A0A0F0KFP7	na	na	na	na	na	na	na	na	na	na	na	na	na	na
104341	1	0	0	1	0	0	A0A8H7P4D3	na	na	na	na	na	A0A8H7P9F3	na	na	na	A0A8H7P2L5	A0A8H7NWB0	na	na	na
1043493	1	0	0	0	0	0	A0A1H6YQI6	na	na	na	na	na	na	na	na	na	na	na	na	na	na
1043627	1	0	0	1	1	0	A0A0F7ZNX3	na	na	na	na	na	A0A0F8A456	A0A0F7ZLS8	na	na	A0A0F7ZGW6	na	na	na	na
1043628	0	0	0	0	0	0	na	na	na	na	na	na	na	na	na	na	W7HZH4	na	na	na	na
1044	1	2	1	1	1	1	A0A074MCM1	na	na	A0A074MA54	A0A074M000	A0A074MCD8	A0A074MHH3	A0A074MEX6	A0A074M801	na	na	na	na	na	A0A074M741
104408	1	0	0	0	0	0	A0A8H3TVG0	na	na	na	na	na	na	na	na	na	A0A8H3TX09	A0A8H3TQG6	na	na	na
104421	1	1	0	1	0	0	E2AAF9	na	E2A0S6	na	na	na	E2ALT7	na	na	na	na	E2AFE6	na	na	na
104452	1	1	0	0	0	0	A0A0L7LQB5	na	A0A0L7LSC6	na	na	na	na	na	na	na	na	A0A0L7KPL9	na	na	na
1045004	0	0	0	1	1	0	na	na	na	na	na	na	G9WJP7	G9WFG3	na	na	G9WG80	na	G9WG71	G9WJ43	na
1045010	1	3	1	1	1	1	A0A9P2GIY4	na	A0A9P2GMB1	A0A9P2UYF7	A0A9P2GGR2	A0A9P2GI47	A0A9P2PS38	A0A9P2GHH2	A0A9P2QZB6	na	A0A9P2GJB9	na	A0A9P2UY70	na	A0A9P2QWM6
1045317	1	2	1	1	1	1	A0A7G9SKB8	na	na	A0A7G9SG14	A0A7G9SGF0	A0A7G9SJQ7	A0A7G9SKI3	A0A7G9SKH9	A0A7G9SIW9	na	na	na	na	na	A0A7G9SH90
1045558	1	3	1	1	1	1	A0A1I2PUB1	na	A0A1I2VW19	A0A1I2PZD0	A0A1I2UUF8	A0A1I2NVP9	A0A1I2TZX0	A0A1I2U1Z4	A0A1I2UAV5	na	na	na	na	na	na
1045773	1	1	0	1	0	0	A0A1G8QM45	na	A0A1G8V3E6	na	na	na	A0A1G8V9E5	na	na	na	A0A1G8JRN1	na	na	na	A0A1G8VBN5
1045774	1	0	0	0	1	0	A0A1G6PJ71	na	na	na	na	na	na	A0A1G6SM42	na	na	na	na	A0A1G6NS78	na	na
1045775	1	3	1	1	1	1	A0A1I2D4L8	na	A0A1I1Z6R4	A0A1I1Z6A6	A0A1I1Z9M9	A0A1I1Z6L4	A0A1I1YZJ0	A0A1I1YZV2	A0A1I2D4R0	na	A0A1I1UMD8	na	na	na	A0A1I2F7H4
1045776	1	3	0	0	1	0	A0A3E0HK68	na	A0A3E0HDJ3	A0A3E0HK63	A0A3E0HKY5	na	na	A0A3E0H3M1	na	na	A0A3E0HAT7	na	na	na	na
1045855	1	3	1	1	1	1	G7UV24	na	G7UUN9	G7UPU5	G7UPU6	G7USW1	G7URQ5	G7URQ4	G7USF6	na	G7UNC5	na	na	na	G7UR37
1045858	0	0	0	1	1	1	na	na	na	na	na	na	G0EJS7	G0EKE9	na	G0EL72	na	na	na	na	G0EIJ2
104605	0	2	1	1	1	1	na	na	na	A0A0A6CZZ5	A0A0A6F6P3	A0A0A6D3T2	A0A0A6CZ77	A0A0A6D0J7	A0A0A6D342	na	na	na	na	na	A0A0A6D027
104608	0	0	0	1	1	1	na	na	na	na	na	na	A0A930E9B0	A0A930E8T9	na	A0A930HBA1	A0A930H7G4	na	na	na	A0A930E5Y9
104609	1	3	1	1	1	1	A0A3S0MRM6	na	A0A432D8P7	A0A432DAN7	A0A3S0MRP7	A0A432DJ50	A0A3S0PSK9	A0A432D499	A0A3S0PIP7	na	A0A432D530	na	na	na	A0A432D4J8
1046115	1	1	0	0	1	1	A0A2T4DUL7	na	A0A2T4DHN2	na	na	na	na	A0A2T4DVA4	A0A2T4DV73	na	na	na	na	na	A0A2T4DTL9
104623	1	3	1	1	1	2	A0A2I5T9E6	na	A0A2I5T512	A0A2I5THB9	A0A2I5TAY2	A0A2I5TP62	A0A2I5TB02	A0A2I5TAX4	A0A2I5TGH4	A0A2I5TM17	A0A2I5TMK2	na	na	na	A0A2I5TBT6
104628	1	3	1	1	1	1	A0A6J4CYQ8	na	A0A6J4CXH1	A0A6J4CXC9	A0A6J4CVR7	A0A6J4CX99	A0A6J4CYG2	A0A6J4D001	na	A0A6J4CZJ5	na	na	na	na	na
1046596	0	1	1	1	1	1	na	na	na	na	J0UP68	J0L2Z3	J1F4F5	A0A0R2E876	na	A0A0R2E6J8	J0L132	na	A0A0R2E2F3	A0A0R2E4K5	na
104662	1	2	0	1	1	1	A0A562TAZ4	na	A0A562TCE3	A0A562TAW6	na	na	A0A562TCA6	A0A562T3S7	A0A562T6F5	na	na	na	na	na	A0A562T0X6
1046624	1	0	0	0	1	1	H5SYZ1	na	na	na	na	na	na	H5T083	na	H5SZS0	na	na	na	H5SY21	na
1046627	1	2	0	1	1	1	G2ECG3	na	G2EEL2	G2EAB7	na	na	G2EGI8	G2EDJ4	G2EFS7	na	na	na	na	na	G2EAN5
1046629	1	3	1	1	1	1	F8HB50	na	F8HCS8	F8HCS9	F8HCS7	F8HCT0	F8HF03	F8HF58	F8HDE9	na	na	na	F8HCQ3	F8HGE1	na
104663	1	2	0	1	1	1	A0A1G7GM70	na	A0A1G7GMA4	A0A1G7GJP6	na	na	A0A1G7GIP8	A0A1G7X409	A0A1G8DBF2	na	na	na	na	na	A0A1G7MPM8
1047168	1	0	0	0	0	0	A0A0F4GY74	na	na	na	na	na	na	na	na	na	A0A0F4GCL8	A0A0F4G919	na	na	na
1047172	1	0	0	1	1	0	A0A4P7H7X4	na	na	na	na	na	A0A4P7H5S3	A0A4P7H1K5	na	na	A0A4P7H337	na	na	na	A0A4P7H646
104777	1	1	0	1	0	0	A0A813PFQ5	na	A0A814PU55	na	na	na	A0A813SNH1	na	na	na	A0A813MW10	A0A813R6F2	na	na	na
1048	2	3	1	1	1	2	A0A4R4A6X0	A0A4R4A6G9	A0A4R4A9M5	A0A4R4AGS6	A0A4R4AIC7	A0A4R4A5C4	A0A4V2WA88	A0A4R4AG82	A0A4R4AA48	A0A4R4A8J0	na	na	na	na	A0A4R4A470
1048205	1	1	0	0	1	0	A0A1Q4UXS0	na	A0A1Q4VBX7	na	na	na	na	A0A1Q4V4R2	na	na	A0A1Q4V855	na	A0A1Q4VA07	na	na
1048245	1	0	0	0	0	0	G0TJP2	na	na	na	na	na	na	na	na	na	G0TIQ4	na	na	na	na
1048260	1	3	1	1	1	1	J9ZB45	na	J9Z7K2	J9Z823	J9Z9C7	J9ZA86	J9ZB81	J9Z757	J9Z7R6	na	na	na	na	na	na
1048332	1	3	1	0	1	1	F8LKM6	na	F8LIK5	F8LIK6	F8LIK4	F8LIK7	na	F8LKE8	F8LJ99	na	na	na	na	F8LKP0	na
1048340	1	3	1	1	1	1	A0A1H2UT30	na	A0A1H3BAX2	A0A1H3BA36	A0A1H3BB30	A0A1H2QWW0	A0A1H2SAY4	A0A1H2SB26	A0A1H3C711	na	na	na	A0A1H2V9X8	A0A1H2YHR2	na
1048380	1	3	0	1	1	1	A0A1B6BAF4	na	A0A1B6BAH6	A0A1B6BAI4	A0A1B6BAH1	na	A0A1B6BFU4	A0A1B6BFV5	A0A1B6BID0	na	na	na	A0A1B6B6Y8	A0A1B6BH94	na
1048394	1	0	0	0	0	0	A0A2M9C504	na	na	na	na	na	na	na	na	na	na	na	na	na	na
1048396	0	3	0	0	0	0	na	na	A0A1H3FE68	A0A1H3NPD3	A0A1H3NNZ3	na	na	na	na	na	na	na	na	A0A1H3J212	A0A1H3I6V4
1048519	1	0	0	1	0	0	A0A6A6H3S6	na	na	na	na	na	A0A6A6HFQ8	na	na	na	A0A6A6H8X8	A0A6A6HLL5	na	na	na
1048642	1	3	1	1	1	1	na	A0A432WUM5	A0A432WX27	A0A432WY15	A0A432WY85	A0A432WWQ8	A0A432WQX3	A0A432WQY6	A0A432WV55	na	na	na	na	na	na
1048808	1	1	1	1	1	1	na	G2DBX7	G2D9E8	na	na	G2DFI6	G2DET6	G2DET7	G2DD66	na	na	na	na	na	na
1048830	0	0	0	0	0	0	na	na	na	na	na	na	na	na	na	na	A0A6P1LEX0	na	A0A6P1LEX2	na	na
1048834	1	3	1	1	1	1	F8ID39	na	F8IES2	F8IES3	F8II74	F8IFC5	F8IFP9	F8IFQ0	F8ID72	na	na	na	na	na	na
1048955	1	0	0	1	0	0	A0A9P4NGW3	na	na	na	na	na	A0A9P4TYQ6	na	na	na	A0A9P4NIZ2	A0A9P4NTE7	na	na	na
1048983	1	2	0	1	1	1	A0A074KY16	na	A0A074L3T6	A0A074KWY4	na	na	A0A074KX14	A0A074KZ53	A0A074KYJ3	na	na	na	na	na	A0A074LFK7
1049	0	0	1	0	0	0	na	na	na	na	na	Q1W3D3	na	na	na	na	na	na	na	na	na
1049199	1	0	0	1	1	1	na	A0A497X4M6	na	na	na	na	A0A497X5K8	A0A497VH96	A0A497WLI1	na	A0A497X189	na	na	na	A0A497VWE1
1049564	1	3	1	1	1	1	na	G2FCW1	G2FG18	G2FIN0	G2FIN1	G2FED6	G2FFV4	G2FFV5	G2FIQ2	na	na	na	na	na	na
1049583	1	1	0	1	0	0	A0A1X7DXY1	na	na	na	A0A4P6RQ64	na	A0A1X7EEJ0	na	na	na	na	na	na	na	A0A1X7EEP6
1049759	1	3	1	1	1	1	V6HUH8	na	V6I011	V6I0C3	V6I1P6	V6HZ34	V6I905	V6HXM6	V6IB26	na	na	na	na	na	V6HYV2
1049789	1	3	1	1	1	1	T0F984	na	T0F2Y1	T0GDU5	T0FAL5	T0G9T4	T0GIU4	T0FEJ0	T0F6I6	na	na	na	na	na	T0GDS5
1049790	1	3	1	1	1	1	V6HQM2	na	V6H9Y5	V6HHA0	V6HH93	V6HC32	V6HE43	V6HBE3	V6HA24	na	na	na	na	na	V6HW79
1049910	1	3	1	1	1	1	M6RC00	na	M6RCW3	M6RH10	M6RTB8	M6RR03	M6RIX6	M6R7M7	M6RF44	na	na	na	na	na	M6RYC9
1049928	1	3	1	1	1	1	M6KKT8	na	M6K326	M6KAR6	M6K1X9	M6K7H2	M6KCR6	M6K7L8	M6K6L1	na	na	na	na	na	M6KL31
1049937	1	3	1	1	1	1	A0A0F6HBT4	na	A0A0F6H4C8	A0A0F6H4U6	A0A0F6H4J1	A0A0F6H7U1	A0A0F6H646	A0A0F6H9L8	A0A0F6H6P6	na	na	na	na	na	A0A0F6H735
1049938	1	3	1	1	1	1	A0A0E2D9W9	na	A0A0E2CY91	A0A0E2D8B7	A0A0E2D0R4	A0A0E2D0U1	A0A0E2DB27	A0A0E2D1T4	A0A0E2D4H9	na	na	na	na	na	A0A0E2CZ46
1049966	1	3	1	1	1	1	A0A0E2B3P2	na	A0A0E2AYT3	A0A0E2B7G5	A0A0E2AYV0	A0A0E2B0E0	A0A0E2BI62	A0A0E2B1S7	A0A0E2B4H0	na	na	na	na	na	A0A0E2B0H6
1049972	1	3	1	1	1	1	I0XV40	na	I0XUJ7	I0XTY3	I0XVY9	I0XS65	I0XPP8	I0XQV6	I0XMC2	na	na	na	na	na	I0XS01
1049976	1	3	1	1	1	1	M6JJM6	na	M6JKY0	M6JJK3	M6JLB7	M6K736	M6JEP0	M6JR82	M6JYJ2	na	na	na	na	na	M6JNS4
1049977	1	3	1	1	1	1	M6YWY6	na	M6ZFM2	M6Z384	M6ZG99	M6ZL91	M6Z080	M6ZNS5	M6YVF2	na	na	na	na	na	M6Z1G1
1049984	1	3	1	1	1	1	A0A0E2BGJ6	na	A0A0E2BIW7	A0A0E2BCD9	A0A0E2BIR7	A0A0E2BAP4	A0A0E2BKN5	A0A0E2BMQ1	A0A0E2BAW8	na	na	na	na	na	A0A0E2B9U7
1049985	1	3	1	1	1	1	M6UKH4	na	M6URX0	M6ULA4	M6UWI1	M6V531	M6URL1	M6UQH5	M6UUP9	na	na	na	na	na	M6V5I8
1049986	1	3	1	1	1	1	N1U7X4	na	N1U292	N1UED0	N1U940	N1TWN1	N1UAL1	N1TZJ7	N1TYP5	na	na	na	na	na	N1U364
1050105	1	1	0	0	1	0	A0A919JZF4	na	A0A919JXI8	na	na	na	na	A0A919MXB1	na	na	A0A919JT57	na	na	na	na
1050107	0	0	0	0	0	0	na	na	na	na	na	na	na	na	na	na	A0A1L3KA44	na	na	na	na
1050174	1	0	0	1	0	0	A0A0G3GTX0	na	na	na	na	na	A0A0G3GLX8	na	na	na	A0A0G3GTR7	na	na	na	A0A0G3GNB2
1050190	1	3	1	1	1	1	A0A727YRV1	na	A0A727TIW3	A0A727TJZ5	A0A727TII2	A0A727TG04	A0A727TII3	A0A727TM86	A0A727Z1B6	na	A0A727TJR6	na	A0A727TGK8	na	A0A727TEW0
1050222	2	3	1	1	1	1	H6CE36	H6CIN9	H6CFE2	H6CFE1	H6CFE3	H6CFD9	H6CME0	H6CME1	H6CE34	na	H6CF71	na	H6CNS3	na	H6CGD6
105023	1	1	0	1	0	0	A0A1A8A523	na	A0A1A8ACJ0	na	na	na	A0A1A8AKL1	na	na	na	na	A0A8C6MFW1	na	na	na
1050370	2	3	1	1	1	1	A0A238DJH8	A0A238DP68	A0A238DM42	A0A975ZIB1	A0A238DN13	A0A975ZJX6	A0A975VX47	A0A975VXB1	A0A238DSA7	na	na	na	na	na	na
1050624	1	3	1	1	1	1	A0A7G8GJ79	na	A0A7G8GK27	A0A7G8GPU3	A0A7G8GPV4	A0A7G8GNK1	A0A7G8GHT3	A0A7G8GMW3	A0A7G8GH32	na	na	na	na	na	A0A7G8GHZ5
1050646	1	3	1	1	1	1	A0A7G8E365	na	A0A7G8E3U6	A0A7G8E9N0	A0A7G8E9N2	A0A7G8E8F3	A0A7G8E1L3	A0A7G8E7B1	A0A7G8E0Z3	na	na	na	na	na	A0A7G8E1R8
1050657	1	3	1	1	1	1	A0A7G8H0M3	na	A0A7G8H1A6	A0A7G8H652	A0A7G8H654	A0A7G8H525	A0A7G8GZ78	A0A7G8H4G2	A0A7G8GYI2	na	na	na	na	na	A0A7G8GZD4
1050714	1	3	1	1	1	1	A0A7G8J827	na	A0A7G8J7V7	A0A7G8JAN8	A0A7G8JAP3	A0A7G8J973	A0A7G8J2B8	A0A7G8J393	A0A7G8J1C1	na	na	na	na	na	A0A7G8J2H4
1051006	1	0	0	1	0	0	F9NVV5	na	na	na	na	na	F9NTU1	na	na	na	F9NYC4	na	na	na	F9NTU0
1051074	1	3	1	1	1	1	F8LYU6	na	F8LWT4	F8LWT5	F8LWT3	F8LWT6	F8LTJ3	F8LW01	F8LXN1	na	na	na	F8LV21	F8LYV6	na
1051139	1	3	1	1	1	1	na	A0A423PHZ6	A0A423PRR1	A0A423PMA4	A0A423PM86	A0A423Q1Q8	A0A423Q3J5	A0A423Q2Q4	na	A0A423Q1S8	na	na	na	na	A0A423Q310
1051531	1	1	0	0	0	0	A0A841CHA7	na	A0A841CCW2	na	na	na	na	na	na	na	A0A841CGR6	na	na	na	na
1051616	1	0	0	1	0	0	A0A3M9YE10	na	na	na	na	na	A0A3M9YA90	na	na	na	A0A3M9Y7A5	A0A3M9XX81	na	na	na
1051646	1	3	1	1	1	1	F9TA08	na	F9T8V0	F9T268	F9T269	F9T4V9	F9TBP2	F9TBP1	F9T155	na	F9T8Q0	na	na	na	F9T745
1051651	0	0	0	0	1	1	na	na	na	na	na	na	na	K6R432	K6QJ58	na	na	na	na	K6PN23	na
1051653	0	0	0	0	1	1	na	na	na	na	na	na	na	A0A0E2BU08	A0A0E2BPW4	na	na	na	na	A0A0E2BN82	na
1051661	0	0	0	0	1	1	na	na	na	na	na	na	na	K6SR41	K6SEQ5	na	na	na	na	K6RI41	na
1051664	1	1	0	1	0	0	A0A1A8C8W0	na	A0A1A8CGF2	na	na	na	A0A1A8C997	na	na	na	na	na	na	na	na
1051890	1	0	0	1	0	0	A0A3N4LRU6	na	na	na	na	na	A0A3N4LT02	na	na	na	A0A3N4LMW1	A0A3N4L9J5	na	na	na
1051891	1	0	0	1	0	0	A0A0C3QCQ1	na	na	na	na	na	A0A0C3QPN4	na	na	na	A0A0C3Q6T5	A0A0C3M7X6	na	na	na
1051973	1	0	0	1	0	0	A0A161GMH1	na	na	na	na	na	A0A161GDM4	na	na	na	A0A161GFS6	na	na	na	A0A161GDN0
1051981	1	0	0	1	1	1	A0A922NU22	na	na	na	na	na	A0A922NUF5	A0A922NVW9	na	A0A922NU68	na	na	A0A922T2V9	A0A922NW48	na
1052	1	3	1	1	1	1	na	A0A125T2Q3	A0A0X8X865	A0A0X8X736	A0A0X8X956	A0A0X8X8Y2	A0A110B262	A0A0X8XA76	A0A0X8X7X7	na	na	na	na	na	na
105219	2	3	1	1	1	1	A0A2N5L6D9	A0A0D5ARV7	A0A0D5AQK1	A0A160BPL7	A0A160BSS9	A0A160BUC6	A0A160BRQ5	A0A160BXY0	A0A160BRT4	na	na	na	na	na	A0A160BWV1
1052209	1	3	1	0	1	1	na	A0A8H9CI61	A0A8H9CJ46	A0A8H8XI69	A0A8H9CHL3	A0A8H8XFQ1	na	A0A8H9CHP6	na	A0A8H8XJF6	A0A8H8XE33	na	na	na	na
1052212	1	3	1	1	1	1	na	A0A482YZN0	A0A482Z0P4	A0A482YUD1	A0A482YQF7	A0A482YS07	A0A482YQD5	A0A482Z2U8	na	A0A482YV82	na	na	na	na	na
1052260	1	0	0	0	0	0	A0A1H0NGY6	na	na	na	na	na	na	na	na	na	A0A1H0R2H3	na	na	na	na
105231	1	1	0	1	0	0	A0A1Y1I5R2	na	na	na	A0A1Y1HJV8	na	A0A1Y1ICU9	na	na	na	A0A1Y1HVK1	A0A1Y1IAM2	na	na	na
1052585	2	3	1	1	1	1	G4NSZ5	G4NQT4	G4NVI7	G4NVI8	G4NVI6	G4NVI9	G4NYA6	G4NYA7	G4NRK6	na	na	na	G4NW03	na	G4NSI1
1052685	1	0	0	1	0	0	A0A8E2APC7	na	na	na	na	na	A0A8E2DL90	na	na	na	A0A8E2DES8	A0A8E2AY76	na	na	na
1052797	1	0	0	1	1	0	A0A4Q7JZR8	na	na	na	na	na	A0A4Q7JS34	A0A4Q7K8G5	na	na	A0A4Q7JQL2	A0A4Q7JH23	na	na	na
1052879	0	0	0	1	0	0	na	na	na	na	na	na	A0A9W8H2A3	na	na	na	na	A0A9W8H1F3	na	na	na
1052880	0	0	0	1	0	0	na	na	na	na	na	na	A0A9W7XJJ0	na	na	na	na	A0A9W7XMQ7	na	na	na
1053134	1	0	0	1	0	0	A0A8H4U617	na	na	na	na	na	A0A8H4XGK2	na	na	na	A0A8H4UTF2	A0A8H4ULN7	na	na	na
1053167	1	3	1	0	1	1	R8HMV5	na	R8HMP3	R8HM35	R8HN40	R8I070	na	R8HGG8	R8I645	na	R8HEB1	na	na	R8I112	na
1053189	1	3	1	1	1	1	J8AVR4	na	J8AH92	J8A1N9	J7XDX5	J8ASQ4	J8AG35	J8B6Z0	J8ARA4	na	J7XPY4	na	J8ATQ9	J8AXE4	na
1053195	1	3	1	0	1	1	J8BAG0	na	J8AYE6	J8BEB4	J8BPP0	J7Y9J3	na	J8BBM8	J8BHR6	na	J7Y150	na	na	J7Y611	na
1053201	1	3	1	1	1	1	J9CQW9	na	J8YZ26	J9CBC3	J9CSW4	J9CQG4	J9BQQ1	J9C700	J9CTW2	na	J9B958	na	J9BYU7	J9CC36	na
1053205	1	3	1	1	1	1	R8DDL5	na	R8DDJ0	R8DD99	R8DD85	R8DDB9	R8CYV3	R8CZ20	R8CJB2	na	R8CKD0	na	R8D407	R8DEL2	na
1053206	1	3	1	1	1	1	J8CYA9	na	J8A3P5	J8D9U5	J8DJ25	J8CU42	J8E4N3	J8APE6	J8D711	na	J8ABB8	na	J8AF34	J8CY49	na
1053211	0	0	0	1	0	0	na	na	na	na	na	na	A0A9W5QR95	na	na	na	na	na	A0A9W5QTF0	na	na
1053215	0	0	0	1	0	0	na	na	na	na	na	na	A0A9W5QDP6	na	na	na	na	na	A0A9W5QH19	na	na
1053219	1	3	1	1	1	1	J8CCQ4	na	J8F1N6	J8FQX8	J8FI06	J8FPN1	J8FB82	J8BWP7	J8C6X3	na	J8CBX0	na	J8CCT0	J8FKD7	na
1053222	1	3	1	0	1	1	J8GFR8	na	J8GCU1	J8FWM4	J8D4A6	J8GKG4	na	J8H042	J8FQ79	na	J8DAC5	na	na	J8GLM3	na
1053223	0	0	0	1	0	0	na	na	na	na	na	na	A0A9W5K6K7	na	na	na	na	na	A0A9W5K8K3	na	na
1053224	1	3	1	1	1	1	R8HTI6	na	R8HSD3	R8HSH6	R8HSP1	R8HS73	R8I370	R8I2U1	R8HPS9	na	R8H1K3	na	R8HT21	R8HSY0	na
1053225	0	0	0	1	0	0	na	na	na	na	na	na	A0A9W5KN80	na	na	na	na	na	A0A9W5KM99	na	na
1053226	1	3	1	1	1	1	J8HXQ4	na	J8HAL8	J8HYB3	J8HR70	J8HVS8	J8IL18	J8IIC9	J8HD65	na	J8EMJ2	na	J8I0B1	J8HSW0	na
1053229	1	3	1	0	1	1	J8JEC1	na	J8JH42	J8JYB5	J8K397	J8GL77	na	J8JP42	J8J9A5	na	J8GFT4	na	na	J8JY50	na
1053230	1	3	1	0	1	1	J8GWD8	na	J8JSW6	J8KE52	J8K951	J8KB42	na	J8KYD5	J8J5J9	na	J8JLE5	na	na	J8KDA4	na
1053231	1	3	1	1	1	1	R8QLD4	na	R8QMM6	R8QLY0	R8QNM5	R8QLV2	R8Q3I6	R8Q2U2	R8QYS9	na	R8PYU8	na	R8QCV6	R8QK74	na
1053233	0	0	0	1	0	0	na	na	na	na	na	na	A0A9W5V053	na	na	na	na	na	A0A9W5PML2	na	na
1053234	1	3	1	0	1	1	R8PE33	na	R8PCX0	R8PD38	R8PDI3	R8PDL1	na	R8NUA4	R8PQB0	na	R8NYD0	na	na	na	na
1053236	1	3	1	1	1	1	R8N699	na	R8N5P0	R8N6E8	R8N5D4	R8N5U1	R8MP94	R8MQ85	R8NJS2	na	R8MHY8	na	R8MWX9	R8N6L3	na
1053238	0	0	0	1	0	0	na	na	na	na	na	na	A0A9W5P1N2	na	na	na	na	na	A0A9W5KZT9	na	na
1053242	0	0	0	1	0	0	na	na	na	na	na	na	A0A9W5R4T5	na	na	na	na	na	A0A9W5R8W8	na	na
1053243	0	0	0	1	0	0	na	na	na	na	na	na	A0A9W5V6P5	na	na	na	na	na	A0A9W5Q8E9	na	na
1053249	1	3	1	0	1	1	R8PE19	na	R8PFZ4	R8PF98	R8PH40	R8PFI6	na	R8NYJ2	R8PM70	na	R8NQ87	na	na	R8PE22	na
105351	1	0	0	1	1	0	A0A401KKC0	na	na	na	na	na	A0A401KJV3	A0A401KUQ6	na	na	A0A401KS71	A0A401KLY9	na	na	na
1053551	1	3	1	1	1	1	A0A318QKL7	na	A0A318QHK4	A0A318QHY8	A0A318QJ46	A0A318QS97	A0A318QFX5	A0A318QHE0	A0A318QFY4	na	A0A318QI16	na	na	na	na
1053647	1	3	1	1	1	1	A0A3M8QAP5	na	A0A3M8Q7H0	A0A3M8Q2W7	A0A3M8Q3B2	A0A3M8Q1V0	A0A3M8Q7B5	A0A3M8Q7A4	A0A3M8Q2F2	na	A0A3M8Q7Y3	na	na	na	A0A3M8Q620
1053692	0	3	0	0	0	0	na	na	G0H1J0	G0H184	G0H1W0	na	na	na	na	na	na	na	G0H1B3	na	G0GZR0
1054033	1	3	1	1	1	1	A0A443TV44	na	A0A443TSQ3	A0A443TSQ6	A0A443TSP9	A0A443TSY5	A0A443TUQ8	A0A443TWJ2	na	A0A443TTQ9	na	na	na	na	na
1054034	1	3	1	1	1	1	A0A4Q0ZKI5	na	A0A4V1LV79	A0A4Q0ZAA7	A0A4Q0ZHM2	A0A4Q0ZG07	A0A4Q0ZJE6	A0A4Q0ZE56	na	A0A4Q0ZLD1	na	na	na	na	na
1054202	1	0	0	1	1	1	na	A0A318TY05	na	na	na	na	A0A318UH17	A0A318U2K9	A0A318TZ75	na	A0A318U3X3	na	na	na	A0A318U3H9
1054213	1	2	1	1	1	1	G9ZZH6	na	G9ZY51	na	G9ZY56	G9ZY58	G9ZY59	G9ZY60	G9ZY57	na	G9ZXA2	na	na	na	G9ZY55
1054217	0	3	0	0	0	0	na	na	M4YU64	M4YNT7	M4YM77	na	na	na	na	na	na	na	na	na	na
1054460	1	3	1	1	1	0	G0ICN9	na	G0I718	G0I719	G0I717	G0I720	G0ID32	G0IAP6	na	na	na	na	G0I6T0	G0I937	na
1054497	1	0	1	1	1	1	na	A0A918MGH2	na	na	na	A0A918MK74	A0A918IMJ1	A0A918IPF4	A0A918ITG5	na	A0A918MH94	na	na	na	A0A918IV93
1054498	1	3	1	1	1	1	na	A0A318KKA8	A0A318KJQ4	A0A318KK54	A0A318KD73	A0A318L324	A0A318KXF0	A0A318KKN1	A0A318KMV2	na	na	na	na	na	na
1054862	1	1	0	0	1	0	M3FW15	na	M3FHF7	na	na	na	na	M3DEI9	na	na	M3EYT3	na	M3EHG8	na	na
105487	1	0	0	1	0	0	A0A194W1P0	na	na	na	na	na	A0A194VYJ0	na	na	na	A0A194VPK1	A0A194VUZ9	na	na	na
1054996	1	3	1	1	1	1	na	A0A1M6YNY9	A0A1M6VPG0	A0A1M6VPD7	A0A1M6VP17	A0A1M6VNU8	A0A1M7BCX4	A0A1M7BC88	A0A1M6XUA0	na	A0A1M6ZTZ4	na	na	na	na
1055352	1	2	0	0	1	0	H0BLG5	na	H0BN66	H0BN67	na	na	na	H0B4L1	na	na	na	na	H0BGT9	na	na
1055468	2	3	1	1	1	1	A0A7X2RU47	A0A7X2RMG6	A0A7X2RQ52	A0A7X2UY58	A0A7X2UWI4	A0A7X2V029	A0A7X2UY90	A0A7X2UZ77	A0A7X2UX62	na	A0A7X2RR82	na	na	na	na
1055469	2	3	1	1	1	1	A0A6I3W646	A0A6I3W9V8	A0A6I3W9V1	A0A6I3W8A1	A0A6I3VYA6	A0A6I3W532	A0A6I3VZJ6	A0A6I3W1G8	A0A6I3W4I4	na	A0A6I3WBR5	na	na	na	A0A6I3W7T2
1055526	1	3	1	1	1	1	G4MJ47	na	G4M7T9	G4M7T8	G4M7T7	G4MER7	G4M2N4	G4M2N3	G4M9Z9	na	G4MGF3	na	na	na	na
1055527	1	3	1	1	1	1	H8H8E1	na	H8H8D7	H8H8D6	H8H4P9	H8H7B9	H8H5T1	H8H5I4	na	H8H714	na	na	na	na	na
1055528	1	3	1	1	1	1	G2M5Y5	na	G2M5Y9	G2M5Z0	G2M5T6	G2M4B7	G2M350	G2M368	na	G2M2V3	na	na	na	na	na
1055529	1	3	1	1	1	1	G2M8M0	na	G2M8M4	G2M8M5	G2M9M2	G2MB52	G2M7S8	G2M7V0	na	G2M798	na	na	na	na	na
1055530	1	3	1	1	1	1	G2MF70	na	G2MF74	G2MF75	G2MBU1	G2MF23	G2MDW6	G2MBL9	na	G2MDL9	na	na	na	na	na
1055531	1	3	1	1	1	1	K7YC11	na	K7Z5E0	K7YC17	K7YBE7	K7Y738	K7Z3S5	K7Z400	na	K7Y427	na	na	na	na	na
1055532	1	3	1	1	1	1	K7Y7V4	na	K7YMY0	K7Y7V1	K7YNG0	K7Y6B0	K7Y1T3	K7Z0U3	na	K7YLY5	na	na	na	na	na
1055533	0	0	0	1	0	0	na	na	na	na	na	na	A0AA35AG54	na	na	na	na	na	A0AA35F940	na	na
1055538	1	3	1	1	1	1	A0A9Q6Y2T6	na	A0A9Q6V0Z9	A0A9Q6Y4B3	A0A9Q6Y1G3	A0A9Q6V129	A0A9Q6UWW3	A0A9Q6UVV4	A0A9Q6V3Q6	na	A0A9Q6UVZ7	na	A0A9Q6V237	na	A0A9Q6V3K5
105559	2	3	1	1	1	1	D8K6P0	D8K522	D8K523	D8K8Q5	D8K8Q6	D8K613	D8K803	D8K665	D8KAV4	na	na	na	na	na	na
1055687	0	0	0	0	0	0	na	na	na	na	na	na	na	na	na	na	G0TSW4	G0U6Q2	na	na	na
1055723	1	2	0	0	1	1	A0A1M6RIZ7	na	A0A1M6W355	A0A1M6YZR5	na	na	na	A0A1M6TTW5	A0A1M6TH87	na	na	na	na	na	A0A1M6TLT6
1056112	0	0	0	1	1	0	na	na	na	na	na	na	G0UF51	G0UHJ3	na	na	G0UFE0	na	G0UFU5	G0UIG6	na
105612	0	0	0	1	1	0	na	na	na	na	na	na	A0A2C8ESF2	A0A5C6M833	na	na	A0A2C8EQT4	na	A0A2C8ELF2	A0A5C6MCR3	na
1056495	0	1	0	0	0	0	na	na	na	na	L0AA52	na	na	na	na	na	na	na	na	na	L0AA51
1056496	1	3	1	1	1	1	A0A5R9QI31	na	A0A5R9QC05	A0A5R9QYE9	A0A5R9QY75	A0A5R9QIJ4	A0A5R9QAD8	A0A5R9Q954	A0A5R9QGZ6	na	na	na	na	na	A0A5R9QBN1
1056511	1	3	1	1	1	2	L8JI15	na	L8JGX5	L8JJE3	L8J870	L8J6X4	L8JD12	L8JCP7	L8J3H4	L8JGE8	L8JCK2	na	na	na	L8J742
1056512	1	3	1	1	1	1	R1H0I7	na	R1J2Q4	R1IMG7	R1IRZ8	R1J0D2	R1IZE2	R1GXF4	R1INQ8	na	R1GUR7	na	na	na	R1IUK2
1056807	1	2	1	1	1	1	na	A0A0C1E2A5	A0A0C1E4Q7	A0A0C1GYU0	na	A0A0C1GMH9	A0A0C1EV51	A0A0C1GYS9	na	A0A0C1GRF3	A0A0C1H209	na	na	na	A0A0C1GJH0
105696	1	0	0	1	0	0	A0A1Y2LSJ0	na	na	na	na	na	A0A1Y2LUM8	na	na	na	A0A1Y2LQ26	A0A1Y2LRN7	na	na	na
105785	1	1	0	0	0	0	A0A2J7REB0	na	A0A2J7PVT2	na	na	na	na	na	na	na	na	A0A2J7RHQ0	na	na	na
1058	2	3	1	1	1	1	A0A1H2SWF9	A0A1H2SS23	A0A1H2SV65	A0A1H2STH4	A0A1H2SV43	A0A1H2QSE9	A0A1H2WUK3	A0A1H2YKC8	A0A1H2Z0Z5	na	na	na	na	na	na
105841	1	3	1	1	1	1	A0A6N2TY51	na	A0A6N2U286	A0A6N2TX16	A0A6N2TWW2	A0A6N2QYB8	A0A6N2W8U6	A0A6N2UKL6	na	A0A6N2RH34	A0A6N2THZ7	na	A0A6N2TIX3	na	na
105843	1	3	1	1	1	1	A0A6N7Y2G1	na	A0A6N7Y2H1	A0A6N7YLI5	A0A6N7YJM7	A0A6N7Y881	A0A6N7YHJ6	A0A6N7YJN8	na	A0A6N7Y3H5	na	na	na	na	na
105984	1	0	0	0	0	0	A0A427XSD9	na	na	na	na	na	na	na	na	na	A0A427XHZ5	na	na	na	na
106	1	2	0	0	1	1	A0A976F103	na	A0A976EZF5	A0A9E6S5L0	na	na	na	A0A976F2G1	A0A976F9Z6	na	A0A976FC08	na	na	na	A0A9E6V2C5
106004	1	1	0	1	0	0	A0A1Y2G0W8	na	A0A1Y2FS12	na	na	na	A0A1Y2FZM5	na	na	na	A0A1Y2BPU4	A0A1Y2FYE2	na	na	na
1061	1	0	0	1	1	1	na	A0A1G7JXB0	na	na	na	na	A0A0N8VGE0	A0A1G7K568	A0A1G7KK29	na	A0A1G7HQ54	na	na	na	A0A1G7E3T6
106147	2	3	1	1	1	1	A0A7Y4LB49	A0A7Y4LA38	A0A7Y4P5S0	A0A7Y4P4X4	A0A7Y4P5W6	A0A7Y4P4E9	A0A7Y4P5J4	A0A7Y4P3T7	na	A0A7Y4L9N7	na	na	na	na	na
1062	1	0	1	1	1	1	na	A0A3D6CW82	na	na	na	A0A3D6CN94	A0A348MSB0	A0A348MPJ2	A0A348MNS6	na	A0A348MRZ2	na	na	na	A0A348MRW7
1063	1	0	0	1	1	1	na	A0A2W5UR57	na	na	na	na	A0A2W5SGM3	A0A2W5TTR4	A0A2W5RXN7	na	A0A2W5SJY5	na	na	na	A0A2W5S7M2
106335	1	0	0	0	0	0	A0A6A2XPB9	na	na	na	na	na	na	na	na	na	A0A6A2WMF0	A0A6A2YN13	na	na	na
106370	1	3	1	0	0	0	A0A1X1PX26	na	A0A1X1PTI2	A0A1X1PU57	A0A1X1PXZ3	A0A1X1PTL9	na	na	na	na	na	na	na	na	na
106412	1	0	0	0	1	0	A0A239NTV7	na	na	na	na	na	na	A0A239IFY8	na	na	A0A239AWW6	na	na	na	na
1064514	0	0	0	1	0	0	na	na	na	na	na	na	A0A9X1B4Q1	na	na	na	na	na	na	na	na
1064535	1	3	1	1	1	2	G0VPI6	na	G0VPJ6	G0VPJ7	G0VN21	G0VPI1	G0VPU3	G0VPU2	G0VQ86	G0VQB8	na	na	G0VPI4	G0VPI0	na
1064539	1	3	0	1	1	1	A0A9P1JMY0	na	A0A9P1JPB4	A0A9P1JP88	A0A9P1JPG4	na	A0A9P1JQ69	A0A9P1NLH6	A0A9P1JQ72	na	na	na	na	na	na
1064592	1	0	0	0	0	0	G0VG53	na	na	na	na	na	na	na	na	na	G0V8G1	na	na	na	na
106549	1	0	0	1	0	0	A0A540NMZ3	na	na	na	na	na	A0A540LJA3	na	na	na	A0A540K7K0	A0A540N842	na	na	na
106582	1	2	0	1	0	0	A0A3P9AZU2	na	A0A3P9B7U4	na	A0A3P9C2C7	na	A0A3P9C840	na	na	na	na	A0A3P9B7X2	na	na	na
106588	0	0	0	1	1	1	na	na	na	na	na	na	A0A921STC3	A0A921STK4	A0A921MK70	na	A0A921MN67	na	A0A921MLF4	A0A921SS63	na
106590	2	3	1	1	1	1	A0A1K0IPC2	A0A1K0JE45	A0A1K0JFF0	A0A1K0IK91	A0A1K0IA12	A0A1K0IQ25	A0A1K0J476	A0A1K0K020	A0A1U9UK58	na	na	na	na	na	A0A1K0IHD6
106592	1	3	1	1	1	1	A0A0L8C629	na	A0A0L8BRN3	A0A0L8BS50	A0A0L8BRN1	A0A0L8C2S6	A0A0L8C700	A0A0L8C6S6	A0A0L8BKJ3	na	A0A0L8BI04	na	na	na	A0A0L8BTF3
1066	1	3	1	1	1	2	na	A0A6L5JZK7	A0A6L5JTH7	A0A6L5JWY5	A0A6L5JXJ4	A0A6L5JUY7	A0A6L5JXX7	A0A6L5K0R6	A0A6L5JYJ8	A0A840G8E6	na	na	na	na	na
106634	1	3	1	1	1	1	A0A0G3G849	na	A0A0G3GA54	A0A0G3GAB4	A0A0G3FYE6	A0A0G3G0Q7	A0A0G3G384	A0A0G3G0Y0	A0A0G3G3Y1	na	na	na	na	na	na
106648	2	3	1	1	1	2	A0A0A8TK31	A0A833PHU6	A0A0A8TNC1	A0A0A8TIW8	A0A0A8TNG8	A0A0A8TMB6	A0A0A8TP59	A0A0A8TP55	A0A0A8TUB1	A0A0A8TKA3	na	na	na	na	na
106649	2	3	1	1	1	2	A0A077L467	A0A077L1G8	A0A077L428	A0A077L2F5	A0A077L2L8	A0A077KZ98	A0A6A1RNI0	A0A077L0D3	A0A077KZJ9	A0A077L230	na	na	na	na	na
106654	1	3	1	1	1	2	A0A0R0WPY6	na	A0A2L1VH52	A0A241YP61	A0A1V0YWZ5	A0A2L1VEV9	A0A246A2D6	A0A2L1VCW1	A0A2L1VMI4	A0A1Y4YRN6	na	na	na	na	na
106734	1	1	0	1	0	0	A0A8C0IW95	na	A0A8C0FWU8	na	na	na	A0A8C0G9C0	na	na	na	na	A0A8C0HKD6	na	na	na
1068590	1	3	1	1	1	1	A0A0C2M0B1	na	A0A0C2QXU7	A0A0C2MN13	A0A0C2QWL2	A0A0C2MPE1	A0A0C2QWR8	A0A0C2MNN7	na	A0A0C2R912	na	na	na	na	A0A0C2RAA0
1068625	0	0	0	0	0	0	na	na	na	na	na	na	na	na	na	na	G0UK52	G0UWI4	na	na	na
1068978	1	1	0	0	1	0	A0A076MNF1	na	A0A076N0N8	na	na	na	na	A0A076MY55	na	na	A0A076MRS3	na	na	na	na
1069081	1	3	1	1	1	1	A0A1W1WRA7	na	A0A1W1WQX0	A0A1W1WQ40	A0A1W1WTK5	A0A1W1WR54	A0A1W1WUI6	A0A1W1WT64	na	A0A1W1WSE5	na	na	na	na	na
1069083	0	3	0	0	0	0	na	na	N6VX98	N6V013	N6UVB9	na	na	na	na	na	na	na	na	na	na
1069201	1	0	0	1	1	0	A0A146FQA0	na	na	na	na	na	A0A146FGK4	A0A146FSJ5	na	na	A0A146F5W4	A0A146F928	na	na	na
1069220	1	1	0	0	0	0	A0A7I7S9J3	na	A0A7I7S9Z6	na	na	na	na	na	na	na	A0A7I7SED3	na	na	na	na
1069443	1	0	0	0	0	0	A0A086TLQ7	na	na	na	na	na	na	na	na	na	na	na	na	na	na
1069534	0	0	0	1	1	1	na	na	na	na	na	na	G2SQM4	G2SQM5	na	G2SPX2	G2SMV5	na	G2SLV3	G2SQE2	na
1069536	1	1	1	1	1	1	A0A0U1QLG7	na	na	na	A0A0U1QPM3	A0A0U1QQ24	A0A0U1QRV8	A0A0U1QRH0	A0A0U1QLE6	na	A0A0U1QL37	na	A0A0U1QNQ3	A0A0U1QLJ6	A0A0U1QPI7
1069620	1	3	1	0	1	1	na	A0A125WDZ8	A0A125WEQ3	A0A125WEF4	A0A125WEF5	A0A125WEV3	na	A0A125WB51	na	A0A125WCW0	na	na	na	na	A0A125WFG6
1069642	2	3	1	1	1	1	K7YWS5	K7YWL1	K7YNZ4	K7YJB7	K7Z9X1	K7Z6G1	K7ZAT5	K7YYV0	K7YXQ5	na	na	na	na	na	na
1069680	1	0	0	0	0	0	M7NT74	na	na	na	na	na	na	na	na	na	na	na	na	na	na
1069827	1	0	0	1	1	1	A0A841YDI7	na	na	na	na	na	A0A841YG49	A0A841YFZ8	A0A841YFC8	na	A0A841YEZ2	na	A0A841YDI9	A0A841YF97	na
1069963	1	0	0	0	0	0	A0A852XBT9	na	na	na	na	na	na	na	na	na	na	na	na	na	na
1069985	1	2	0	1	1	1	A0A0C1D6P1	na	A0A0C1FIK4	A0A0C1D569	na	na	A0A0C1FEP0	A0A0C1FVG7	A0A0C1G7C9	na	na	na	na	na	A0A0C1F507
1070130	0	3	1	1	1	0	na	na	A0A143WR28	A0A143WQV2	A0A143WSI9	A0A143WPY4	A0A143WSG8	A0A143WQJ7	na	na	na	na	na	na	na
1070319	1	3	1	1	1	1	G2JAM7	na	G2JAM4	G2JAM3	G2JAM2	G2JAM6	G2JAK0	G2JAM8	G2JAM5	na	na	na	na	na	na
1070421	1	0	0	0	0	0	A0A7X6N234	na	na	na	na	na	na	na	na	na	A0A7X6N1B8	na	A0A7X6N489	na	na
1070424	1	2	0	0	1	0	A0A919QAC1	na	A0A919UK24	A0A919UQJ2	na	na	na	A0A919UHW4	na	na	A0A919QH49	na	na	na	na
1070431	1	2	1	1	1	1	A0A841LCM9	na	na	A0A841KZE8	A0A841L0L2	A0A841L7U8	A0A841L258	A0A841L251	A0A841LBI5	na	na	na	na	na	A0A841L2W7
1070528	1	3	1	1	1	0	A0A6C0JTH4	na	A0A6H1ZVJ2	A0A6C0EMW0	A0A6C0EJH9	A0A6C0K5S3	A0A6M3M2I0	A0A6M3J9V2	na	na	A0A6C0CAN3	na	na	A0A6M3M712	A0A6M3JQP2
1070774	0	1	0	0	0	0	na	na	U1P7M3	na	na	na	na	na	na	na	na	na	na	na	U1PD44
1070861	1	2	0	0	1	0	A0A3A4A4E5	na	na	A0A3A4BW36	A0A3A4AZJ6	na	na	A0A3A3ZZ54	na	na	A0A3A4AET5	na	na	na	na
1070870	1	0	0	0	1	0	A0A1M5DMV2	na	na	na	na	na	na	A0A1M5DFA6	na	na	A0A1M5I8E8	na	na	na	na
1071	1	1	1	1	1	1	A0A2S6N7D0	na	na	na	A0A2S6NLC0	A0A2S6NI48	A0A2S6NI56	A0A2S6NLN1	A0A2S6NI82	na	A0A2S6MWB7	na	na	na	A0A2S6N687
1071078	2	3	1	1	1	1	A0A6I7F4V3	A0A6I7FGW0	A0A6I7F0Y1	A0A6I7F9M9	A0A6I7FBV7	A0A6I7FB60	A0A6I7FDT4	A0A6I7FFM3	A0A6I7FA57	na	A0A6I7FGZ8	na	A0A6I7F7P5	na	A0A6I7FBQ2
1071080	1	3	1	1	1	1	na	A0A7Z2SWR1	A0A7Z2Y9H1	A0A7Z2Y9D9	A0A7Z2Y9F6	A0A7Z2STF5	A0A7Z2SXI5	A0A7Z2SXQ3	A0A7Z2SUY1	na	A0A7Z2SV27	na	A0A7Z2T094	na	A0A7Z2SWQ9
1071085	0	1	0	0	0	0	na	na	A0A6B9Y569	na	na	na	na	na	na	na	na	na	na	A0A6B9Y9T2	A0A6B9Y5K2
1071378	1	0	0	0	0	0	G0W5Q3	na	na	na	na	na	na	na	na	na	G0W445	na	na	na	na
1071380	1	0	0	0	0	0	I2H273	na	na	na	na	na	na	na	na	na	I2H2T7	na	na	na	na
1071381	1	0	0	0	0	0	G8C092	na	na	na	na	na	na	na	na	na	G8BTS6	na	na	na	na
1071382	1	0	0	0	0	0	H2ATY9	na	na	na	na	na	na	na	na	na	H2AVV4	na	na	na	na
1071383	1	0	0	0	0	0	J7RRB7	na	na	na	na	na	na	na	na	na	J7S663	na	na	na	na
1071390	2	3	1	1	1	2	G7GG87	G7GGR5	G7GEN5	G7GE02	G7GE03	G7GF15	G7GG09	G7GG06	G7GFH8	G7GEV8	na	na	na	na	na
1071400	1	0	0	1	1	0	J9W148	na	na	na	na	na	J9W0L1	J9W333	na	na	J9W2K8	na	J9W324	J9W461	na
1071679	2	1	1	1	1	1	A0A069NIR2	A0A069P1L6	A0A069NM63	na	na	A0A069P6B3	A0A069P6E2	A0A069P6P0	A0A069NR93	na	A0A069P4A5	na	na	na	na
1071718	1	3	1	1	1	1	A0A7V7RMS8	na	A0A7V7RJR5	A0A7V7RJW7	A0A7V7RJT6	A0A7V7RKS0	A0A7V7RNF9	A0A7V7RNL6	A0A7V7RJR1	na	A0A7V7RMK9	na	A0A7V7RMU6	A0A7V7RKG4	A0A7V7UWK8
1071918	1	2	0	1	1	1	A0A1G7DLL4	na	A0A1G7CZG5	A0A1G7ADY1	na	na	A0A1G7CYS8	A0A1G7BPJ9	na	A0A1G7ECV5	na	na	na	na	na
107208	1	1	0	0	0	0	A0A7K5PLA8	na	A0A7K5PRN8	na	na	na	na	na	na	na	na	A0A7K5P5A5	na	na	na
1072105	1	0	0	0	0	0	A0A1G4ISI8	na	na	na	na	na	na	na	na	na	A0A1G4JW39	na	na	na	na
107213	1	1	0	1	0	0	A0A9N9SNQ6	na	A0A9P0E027	na	na	na	A0A9N9SWU9	na	na	na	na	A0A9N9TB62	na	na	na
1072256	1	0	0	1	0	0	A0A0G3HL88	na	na	na	na	na	A0A0G3H9X9	na	na	na	A0A0G3HJM1	na	na	na	A0A0G3HGB3
1072389	1	0	0	1	0	0	K1X362	na	na	na	na	na	K1WR99	na	na	na	K1WEF6	K1WBK2	na	na	na
107243	1	0	0	0	0	0	A0A1J3CJI0	na	na	na	na	na	na	na	na	na	A0A1J3CJQ8	na	na	na	na
1072463	1	0	0	0	0	0	A0A3Q9IYS8	na	na	na	na	na	na	na	na	na	A0A3Q9J4J8	na	na	na	na
1072467	1	2	0	1	1	0	L7YCT0	na	L7Y6S3	L7YD71	na	na	L7YEK6	L7YC18	na	na	na	na	na	na	na
1072583	2	3	1	1	1	1	A0A265DZP1	A0A265E283	A0A265DVU3	A0A265DUY9	A0A265DV65	A0A265DWX6	A0A265E3N7	A0A265E317	A0A265DXY2	na	na	na	na	na	A0A265DV13
1072685	1	3	1	1	1	1	na	A0A077DCA8	A0A077DEX7	A0A077DJQ1	A0A077DEQ1	A0A077DFN2	A0A077DGK6	A0A077DCB4	na	A0A077DBP0	na	na	na	na	A0A077DAP7
1073089	1	0	0	1	1	0	A0A1L9RDH7	na	na	na	na	na	A0A1L9RE12	A0A1L9RKB9	na	na	A0A1L9RCS1	A0A1L9RRV1	na	na	na
1073090	1	0	0	1	0	0	A0A1L9SP95	na	na	na	na	na	A0A1L9SGS4	na	na	na	A0A1L9SKR0	A0A1L9SCM6	na	na	na
1073196	2	3	1	1	1	1	A0A286DEX1	A0A286CW50	A0A286D1X2	A0A286D4K9	A0A286D4M2	A0A286D9P2	A0A286D717	A0A286D768	A0A286D9A6	na	na	na	na	na	A0A286D701
1073253	1	1	0	0	1	0	A0A840PFZ5	na	A0A840P6L3	na	na	na	na	A0A840PNR2	na	na	A0A840PBY6	na	na	na	na
107327	2	3	1	1	1	1	A0A2C9ZZD7	A0A244CW03	A0A244CMF7	A0A244CVE6	A0A244CVE5	A0A244CS42	A0A244CNJ7	A0A244CNR7	A0A244CR47	na	na	na	na	na	na
1073325	1	2	0	1	1	1	A0A1M5C3Q5	na	A0A1M5GRU6	A0A1M5GQ94	na	na	A0A1M5KM90	A0A1M5GDV0	A0A1M5HB13	na	na	na	na	na	A0A1M5K2G4
1073327	1	2	0	1	1	1	A0A1M7Z7A9	na	A0A1M7Z6J0	A0A1M7ZEN3	na	na	A0A1M7ZII6	A0A1M7ZHG3	A0A1M7ZBD2	na	na	na	na	na	A0A1M7Z3U1
1073328	1	2	0	1	1	1	A0A1H2QIM9	na	A0A1H2Q232	A0A1H2Q932	na	na	A0A1H2Z761	A0A1H2X9W3	A0A1H2WZS0	na	na	na	na	na	A0A1H2X4E5
1073351	1	3	1	1	1	1	S3YCI9	na	S3YC98	S3Y9K2	S3YPN3	S3YDA3	S3Z902	S3YJ85	na	S3YET6	na	na	na	na	S3Y9R6
1073353	1	3	1	1	1	0	M3JDZ0	na	M3HZS7	M3GWM9	M3GW01	M3IJW3	M3GZP6	M3JDN6	na	na	na	na	na	na	na
1073362	1	0	1	1	1	1	na	V7IFJ7	na	na	na	V7IBE8	V7I9F3	V7IFS2	na	V7IB26	na	na	na	na	V7IF98
1073366	1	1	1	1	1	1	V8CLI8	na	na	na	V8CMR4	V8CMF7	V8CRJ7	V8CJY3	V8CR11	na	na	na	na	na	V8CLN6
1073372	1	0	0	1	1	1	V8BC11	na	na	na	na	na	V8B7U7	V8BHA2	V8BDZ4	na	na	na	V8BDN6	V8BG04	na
1073375	0	0	0	1	1	1	na	na	na	na	na	na	A0A829NRV5	A0A829NPI5	na	A0A829NC21	A0A829NH34	na	A0A829ND42	A0A829NKX5	na
1073376	1	3	1	1	1	1	V8BL86	na	V8BL59	V8BM42	V8BK58	V8BK92	V8BXZ2	V8C3V6	na	V8C4V3	na	na	V8BSG6	na	V8C3E1
1073383	1	3	1	1	1	1	K1J1B0	na	K1IZL4	K1IVS4	K1JFI2	K1JN47	K1IZN7	K1IUW9	K1JEM5	na	K1IN87	na	na	na	K1J3K9
1073387	1	3	1	0	1	1	K1GKD6	na	K1FQN7	K1FNU1	K1GL00	K1FQK1	na	K1FYB7	K1GTQ4	na	na	na	na	na	K1G316
1073423	0	0	0	1	1	1	na	na	na	na	na	na	A0A1X7NQL2	A0A1X7NS29	A0A1X7NJ08	na	A0A1X7NDA5	na	A0A1X7MRA5	A0A1X7MRX9	na
1073571	1	3	1	1	1	1	A0A0E4CUJ8	na	A0A0E4CX89	A0A0E3WHY8	A0A0E4HAY1	A0A0E4HEL6	A0A0E4HEH0	A0A0E3WIV8	A0A0E4HAL8	na	A0A0E3WGF9	na	A0A0E4CYE8	na	A0A0E4CV88
1073574	1	0	0	1	0	0	G7H2W6	na	na	na	na	na	G7GXJ2	na	na	na	G7H5K4	na	na	na	G7GZ33
1073996	0	3	0	0	0	0	na	na	A0A1H6RQP9	A0A1H6RQV1	A0A1H6S353	na	na	na	na	na	na	na	na	na	A0A1H6RB69
1073999	1	3	1	0	1	2	K8AGJ6	na	K8A908	K7ZX58	K8A0R0	K7ZXX5	na	K8AJ82	K8AIN0	K8A0J7	K8A0D7	na	na	na	K8A2W3
1074	1	3	1	1	1	1	A0A212R9B0	na	A0A212RHI0	A0A212RIW4	A0A212S1X1	A0A212RIL4	A0A212RG65	A0A212RAW4	A0A212RZK8	na	na	na	na	na	na
1074000	1	3	1	1	1	2	A0A376EPV7	na	A0A376EU27	A0A376EUX3	A0A376E3R4	A0A376ETH3	A0A376E3H4	A0A376E3D1	A0A376EYL4	A0A376E9S5	A0A376E188	na	na	na	A0A376F121
107401	1	2	0	1	1	1	A0A5S9RHZ7	na	A0A5S9UCH4	A0A5S9TTM0	na	na	A0A5S9T9I0	A0A5S9U8G1	A0A5S9RN85	na	na	na	na	na	A0A5S9UFY1
1074311	1	3	1	1	1	1	A0A347UVE3	na	A0A347UR61	A0A347UQ80	A0A347UQ81	A0A347US81	A0A347USI7	A0A347USI8	A0A347UML3	na	na	na	na	na	A0A347UM80
1074467	1	1	0	1	1	0	A0A0K2LDJ4	na	A0A0K2LF17	na	na	na	A0A0K2LAQ5	A0A0K2LB03	na	na	A0A0K2L9T9	na	A0A0K2LAN1	A0A0K2LDC4	na
1074872	1	1	0	0	0	0	A0A139XSZ2	na	A0A139Y0Z8	na	na	na	na	na	na	na	na	na	na	na	na
1074873	1	1	0	0	0	0	A0A2G8XTG7	na	A0A2G8XPY7	na	na	na	na	na	na	na	na	na	na	na	na
1074889	1	2	0	1	1	0	G7SPY5	na	G7SQB5	G7SR62	na	na	G7SR24	G7SQ08	na	na	na	na	na	na	na
1074919	1	2	1	1	1	2	na	A0A7U7EXI4	na	A0A7U7EY14	A0A7U7IEI2	A0A7U7IEI7	A0A7U7IFK1	A0A7U7EYY5	A0A7U7EZS6	A0A7U7IFE9	A0A7U7EX94	na	A0A7U7EYV0	A0A7U7EZS9	A0A7U7EYX9
1075090	1	0	0	1	0	0	G7GW06	na	na	na	na	na	G7GM87	na	na	na	G7GJE1	na	na	na	G7GNV3
1075091	1	3	0	1	1	1	A0A7U9GKG2	na	A0A7U9CAG5	A0A7U9CAA0	A0A7U9CA87	na	A0A7U9GLD6	A0A7U9GL43	A0A7U9GKF6	na	na	na	A0A7U9CAG4	A0A7U9CDS7	na
1075399	1	1	0	0	1	0	G8LR00	na	G8LRL2	na	na	na	na	G8LRW4	na	na	na	na	na	na	na
1075402	1	3	0	0	0	0	A0A1E7JVH1	na	A0A1E7JW74	A0A1E7JW47	A0A1E7JW58	na	na	na	na	na	na	na	A0A1E7KF78	na	na
1075417	1	2	0	1	1	1	A0A1G9NB98	na	A0A1G9GWR0	A0A1G9GXG1	na	na	A0A1G9UA16	A0A1G9D9J6	A0A1G9MWX3	na	A0A1G9HVD5	na	na	na	A0A1G8ZRU1
1076	1	3	1	1	1	2	A0A0D7EGL2	na	A0A0D7F371	A0A0D7F586	A0A0D7EIP5	A0A0D7EVI6	A0A0D7DZ61	A0A0D7E2P2	A0A0D7EJP0	A0A323UN99	na	na	na	na	na
1076124	1	1	0	0	1	0	A0A6F8Y2P0	na	A0A6F8XQM1	na	na	na	na	A0A6F8Y5X5	na	na	A0A6F8XIF1	na	na	na	na
1076125	1	1	0	0	1	0	A0A6V8L893	na	A0A6V8LLL7	na	na	na	na	A0A6V8L6L9	na	na	A0A6V8KU09	na	na	na	na
1076126	2	3	0	0	1	0	A0A6V8K9P5	A0A6V8KT19	A0A6V8KHG4	A0A6V8KM21	A0A6V8KI77	na	na	A0A6V8KDK5	na	na	A0A6V8JXS0	na	na	na	na
1076179	2	3	1	1	1	2	A0A644SJ10	A0A644SWT2	A0A644SJ54	A0A644SRJ9	A0A644SU30	A0A644TJ17	A0A644SP95	A0A644SN34	A0A644TBD4	A0A644SVM7	A0A644WZL6	A0A645JH40	A0A644UFQ9	A0A644VHI1	A0A644SSC7
1076256	1	0	0	1	0	0	A0A2H3BPU7	na	na	na	na	na	A0A2H3BTX2	na	na	na	A0A2H3CB58	A0A2H3BW99	na	na	na
1076344	0	0	0	1	0	0	na	na	na	na	na	na	A0A146K8X2	na	na	na	A0A146KA61	A0A146KDS8	na	na	na
1076397	1	0	0	0	1	0	A0A7Y6HMT1	na	na	na	na	na	na	A0A7Y6LU09	na	na	na	na	A0A7Y6HNP8	na	na
1076400	1	1	0	0	1	0	A0A7Y6H4E3	na	A0A7Y6LJ63	na	na	na	na	A0A7Y6LIA6	na	na	A0A7Y6H433	na	na	na	na
1076443	1	0	0	0	1	0	A0A2T0UL69	na	na	na	na	na	na	A0A2T0UHW5	na	na	na	na	na	na	na
1076549	1	3	1	1	1	2	A0A0B1R0Y0	na	A0A0B1RAJ0	A0A0B1R509	A0A0B1R7D6	A0A0B1R651	A0A0B1RBL6	A0A0B1R796	A0A0B1R9K1	A0A0B1RBY0	A0A0B1R4S8	na	na	na	A0A0B1R7R5
1076550	1	3	1	1	1	2	A0A1X1CQZ9	na	A0A1X1CS59	A0A1X1CSD6	A0A1X1CTZ4	A0A1X1CS22	A0A1X1CUD9	A0A1X1CU39	A0A1X1CR47	A0A1X1CS04	na	na	na	na	A0A1X1CMJ2
1076551	1	2	1	1	1	2	A0A1X1D8J3	na	A0A1X1D9S3	A0A1X1DA69	na	A0A1X1D9T6	A0A1X1DCS5	A0A1X1DCA1	A0A1X1CTT8	A0A1X1D410	A0A1X1CXE0	na	na	na	A0A1X1DF55
1076588	2	3	1	1	1	1	A0A7C5IZM6	A0A7C5J050	A0A7U6JIW4	A0A7C5MXK6	A0A7C5MUM3	A0A7U6GI97	A0A7U6JHA4	A0A7U6JGM8	A0A7U6GJX9	na	na	na	na	na	na
1076594	1	3	1	1	1	1	A0A252BT59	na	A0A252BWU7	A0A252BX35	A0A252BWW3	A0A252BV98	A0A252BYA9	A0A252BYD5	A0A252BYB1	na	na	na	na	na	na
1076596	1	3	1	1	1	1	A0A1U9LBQ2	na	A0A1U9LC66	A0A6V8I7B0	A0A1U9LC50	A0A6V8IF96	A0A1U9LE23	A0A1U9LE27	A0A1U9LHW5	na	A0A1U9LF53	na	na	na	na
1076620	1	3	1	0	1	1	A0A9Q7S956	na	A0A9Q7WGD3	A0A9Q7S0T5	A0A9Q7S0T2	A0A9Q7S081	na	A0A9Q7WCE3	A0A9Q7S2H7	na	A0A9Q7S502	na	na	na	A0A9Q7S465
1076696	0	0	0	1	0	0	na	na	na	na	na	na	K2GWA2	na	na	na	na	K2H5G4	na	na	na
1076744	1	1	1	1	1	1	A0A3M6QFG8	na	na	na	A0A3M6Q198	A0A3M6QBB2	A0A3M6Q537	A0A3M6PSU1	A0A3M6QBK6	na	na	na	na	na	A0A3M6Q6Q8
1076926	1	3	1	1	1	1	A0A1S9GPJ9	na	A0A1S9H288	A0A1S9H2M9	A0A1S9GLZ2	A0A1S9GS64	A0A1S9G6Y6	A0A1S9G7L7	A0A1S9GXA9	na	A0A1S9GKU1	na	na	na	A0A1S9GUW9
1076934	1	1	1	1	1	1	S5R0F3	na	S5RLF6	na	na	S5QXJ8	S5RNG6	S5RH68	na	S5R6X4	S5R111	na	S5R083	S5QWF5	na
1076935	1	0	0	1	0	0	U4LBQ0	na	na	na	na	na	U4KYA2	na	na	na	U4KVT2	U4L043	na	na	na
1076937	1	3	1	1	1	1	A0A1I2JTB1	na	A0A1I2HBZ6	A0A1I2HTZ4	A0A1I2HRQ0	A0A1I2HZI6	A0A1I2K6E0	A0A1I2K5X4	A0A1I2HLI0	na	na	na	na	na	A0A1I2H8J9
1077150	0	1	0	0	0	0	na	na	A0A7S1TJU1	na	na	na	na	na	na	na	na	na	na	na	na
1077255	1	3	1	1	1	1	A0A2T5IVR2	na	A0A2T5IZ52	A0A2T5IWI5	A0A2T5IWI1	A0A2T5IZ11	A0A2T5J1A1	A0A2T5J102	A0A2T5IZL2	na	na	na	na	na	na
1077256	0	2	0	0	0	0	na	na	A0A2A2HFU9	na	A0A2A2HBJ3	na	na	na	na	na	na	na	na	na	A0A2A2HDS4
1077284	1	1	0	0	0	0	A0A0J9S6F4	na	A0A0J9V1K2	na	na	na	na	na	na	na	na	na	na	na	na
1077348	1	0	0	1	0	0	A0A2G8STX1	na	na	na	na	na	A0A2G8SQS4	na	na	na	A0A2G8SQW2	A0A2G8SJ31	na	na	na
1077442	0	0	0	1	0	0	na	na	na	na	na	na	A0A093V395	na	na	na	A0A093VCM5	A0A093VY27	na	na	na
1077464	1	3	1	1	1	1	A0A0F2E874	na	A0A0F2E2T4	A0A0F2E2C2	A0A0F2E2C7	A0A0F2DZT8	A0A0F2E4Q9	A0A0F2E4V9	na	A0A0F2DW08	na	na	A0A0F2E3W2	A0A0F2E121	na
1077675	0	0	0	1	1	2	na	na	na	na	na	na	A0A2W4BFU2	A0A2W3YSJ1	A0A2W3ZLQ3	A0A2W3ZPS9	A0A2W3Z5Y9	na	A0A2W3Z0H8	A0A2W3ZGB5	na
1077935	1	0	1	1	1	1	na	A0A2H5F3C8	na	na	na	A0A2H5EXE4	A0A2H5F3S9	A0A2H5EU44	A0A2H5F2H0	na	A0A2H5EWD0	na	na	na	A0A2H5F123
1077936	1	2	0	1	1	1	A0A1N6TFD9	na	A0A1N6SXE1	A0A1N6WHU1	na	na	A0A1N6T5A3	A0A1N6T0H4	A0A1N6TNZ8	na	na	na	na	na	A0A1N6YL59
1077942	1	1	0	0	0	0	A0A4Q8BEK5	na	A0A4Q8BF87	na	na	na	na	na	na	na	na	na	na	na	na
1077944	0	0	0	0	0	0	na	na	na	na	na	na	na	na	na	na	na	na	A0A9X1TKD3	na	na
1077946	1	0	0	0	1	0	A0A387HKQ8	na	na	na	na	na	na	A0A387HN59	na	na	na	na	A0A387HLM5	na	na
1077947	1	0	0	1	1	1	na	A0A1H8AXJ3	na	na	na	na	A0A1H8D558	A0A1H8BQ43	A0A1H8E2F1	na	A0A1H8DI81	na	na	na	A0A1H8C951
1077972	1	1	0	1	0	0	H0QJI8	na	H0QLN4	na	na	na	H0QHX4	na	na	na	H0QM09	na	na	na	H0QHX2
1077974	1	0	0	1	0	0	H0R2A2	na	na	na	na	na	H0R4Z6	na	na	na	H0R687	na	na	na	H0R5W9
1078	1	3	1	1	1	1	A0A973X3Z6	na	A0A973X493	A0A973WXF1	A0A973X3E9	A0A973X442	A0A974AGL9	A0A973X3A4	A0A973X3B2	na	na	na	na	na	na
1078020	1	0	0	1	0	0	G7CF22	na	na	na	na	na	G7CFL6	na	na	na	G7CNN5	na	na	na	G7CD96
1078034	1	3	1	1	1	1	A0A7U9LRV4	na	A0A7U9LKX3	A0A7U9QC84	A0A7U9LRL7	A0A7U9LMR1	A0A7U9LHN7	A0A7U9LG41	A0A7U9LNW5	na	A0A7U9LN34	na	A0A7U9LPD1	na	A0A7U9QB46
1078050	1	2	0	1	1	1	na	A0A4R1KC40	A0A4R1K9T1	na	A0A4R1KEV7	na	A0A4R1K5L3	A0A4R1K5L4	na	A0A4R1K8T5	na	na	na	na	A0A4R1K6A2
107806	0	0	0	1	1	0	na	na	na	na	na	na	P57233	P57232	na	na	na	na	na	na	na
1078083	1	3	1	1	1	2	na	S2XTP6	S2XAS9	S2XMC3	S2XU25	S2Y7P1	S2XHX5	S2YJG5	S2XLD3	S2XG78	S2XBH1	na	S2XHL9	na	S2XP76
1078085	1	3	1	1	1	1	S2YN59	na	S2XXE3	S2XDL9	S2XCP7	S2XIP7	S2XQJ5	S2XWG1	S2XG06	na	na	na	S2XJ59	na	S2XMC2
1078086	1	1	0	0	1	0	S2Y2C4	na	S2ZBP1	na	na	na	na	S2Y6U4	na	na	S2XV34	na	na	na	na
1078087	1	3	1	1	1	1	A0A0F5JAB3	na	A0A0F5J3C3	A0A0F5J243	A0A0F5IL28	A0A0F5ILQ7	A0A0F5J116	A0A0F5IJM0	A0A0F5IPK2	na	na	na	na	na	A0A0F5IX22
1078089	1	3	1	1	1	1	U6R7S5	na	U6RTG7	U6RSR1	U6RLX5	U6RHX2	U6RQV9	U6R803	U6RUE2	na	na	na	na	na	U6RJI5
1078480	1	3	1	1	1	1	A0A369YJK8	na	A0A369YMB2	A0A369YLB3	A0A369YPX5	A0A369YCA3	A0A369YE70	A0A369YMI4	na	A0A369YFG7	na	na	na	na	A0A369YJY6
1078773	2	3	1	1	1	1	A0A0U3K6D9	A0A0U3LMR4	A0A0U3LI90	A0A0U3LEZ3	A0A0U3L453	A0A0U2SKX1	A0A0U3BE91	A0A0U3CIN3	A0A0U3AN61	na	A0A0U3LJ34	na	na	na	A0A0U3LLB0
1078905	1	3	0	0	0	0	A0A128A0D8	na	A0A128A573	A0A128A0E7	A0A128A0F2	na	na	na	na	na	na	na	na	na	na
1079	1	3	1	1	1	1	A0A0H5BQ95	na	A0A0H5BFR0	A0A0H5BQJ2	A0A0H5BK42	A0A0H5BQ60	A0A0H5BDY8	A0A0S4Q1G8	A0A0S4Q6C7	na	na	na	na	na	A0A0P0JJ42
1079267	1	0	0	1	0	0	A0A9P9EVK6	na	na	na	na	na	A0A9P9FDJ9	na	na	na	A0A9P9FK00	A0A9P9J8Z2	na	na	na
1079460	1	3	1	1	1	1	A0A559SNG6	na	A0A559TH48	A0A559TH42	A0A559TH41	A0A559SLH9	A0A559SNP1	A0A559SNP0	A0A559ST78	na	A0A559SML1	na	na	na	A0A559SV32
1079859	1	2	0	1	1	1	A0A1I5N2A0	na	A0A1I5MGX5	A0A1I5RZC7	na	na	A0A1I5VVC1	A0A1I5SV88	A0A1I5RPV5	na	A0A1I5TL97	na	na	na	A0A1I5Y8T3
1079896	1	3	0	0	0	0	G3M465	na	G3M463	G3M464	G3M462	na	na	na	na	na	na	na	na	na	na
1079985	1	3	0	0	1	0	A0A2N9B1Y2	na	A0A2N9B369	A0A2N9B6U7	A0A2N9B6Y3	na	na	A0A2N9BHJ9	na	na	A0A2N9BAT0	na	A0A2N9BFQ2	na	A0A2N9B6W0
1079994	1	0	0	1	0	0	A0A147EBV1	na	na	na	na	na	A0A147EMF0	na	na	na	A0A147EGB6	na	na	na	na
108003	2	3	1	1	1	1	A0A1V3NHK9	A0A1V3NDE4	A0A1V3NDH7	A0A1V3NKH5	A0A1V3NKV5	A0A1V3NLX7	A0A1V3NBN1	A0A1V3NAZ3	A0A1V3NRA7	na	na	na	na	na	na
108015	1	3	1	1	1	1	A0A0R3BZN2	na	A0A0R3CPP9	A0A0R3CZP9	A0A0R3C488	A0A0R3BQQ1	A0A0R3C8I6	A0A0R3C538	A0A0R3BI67	na	na	na	na	na	na
108018	1	0	0	1	0	0	A0A8H8BUN3	na	na	na	na	na	A0A8H7T5B2	na	na	na	A0A8H7T3W7	A0A8H7WA72	na	na	na
1080223	1	3	1	1	1	1	A0A5C2H872	na	A0A5C2H9E3	A0A5C2H3Z1	A0A5C2H7M9	A0A5C2H2J8	A0A5C2H954	A0A5C2H6P4	na	A0A5C2HFD3	na	na	na	na	na
1080224	1	3	0	1	1	1	A0A4Q9FN35	na	A0A4Q9FL98	A0A4Q9FN53	A0A4V2JBD5	na	A0A4Q9FJ69	A0A4Q9FM79	A0A4Q9FU77	na	na	na	na	na	A0A4Q9FNX7
1080225	1	2	0	1	1	1	A0A2T0M8R8	na	A0A2T0M6N6	A0A2T0M8D0	na	na	A0A2T0M6Y3	A0A2T0MJY3	A0A2T0MJG2	na	A0A2T0MB66	na	na	na	A0A2T0MJL8
1080227	1	3	1	1	1	1	A0A1C3EPV0	na	A0A1C3EPV2	A0A1C3EPS1	A0A1C3E689	A0A1C3EI62	A0A1C3EGK3	A0A1C3EGE8	A0A1C3ED34	na	A0A1C3EKU1	na	na	na	A0A1C3EJM2
1080233	1	0	0	1	0	0	A0A6A6CU38	na	na	na	na	na	A0A6A6CA71	na	na	na	A0A6A6BYG7	A0A6A6C7A7	na	na	na
1080344	1	0	0	1	0	0	W9N9W4	na	na	na	na	na	W9P6D5	na	na	na	W9Q5C6	W9PID6	na	na	na
1080349	1	0	0	0	0	0	A0A0L8RK98	na	na	na	na	na	na	na	na	na	A0A0L8RNW4	na	na	na	na
1081025	0	0	0	1	0	0	na	na	na	na	na	na	A0A9X9WS63	na	na	na	na	na	na	na	na
1081091	1	1	0	0	1	0	A0A428W551	na	A0A428WHD9	na	na	na	na	A0A428VXV7	na	na	A0A428W0S3	na	na	na	A0A428VU51
1081102	1	0	0	0	0	0	A0A167NFE2	na	na	na	na	na	na	na	na	na	A0A162LCH8	A0A167QA12	na	na	na
1081103	1	0	0	0	1	0	A0A0B2WXD7	na	na	na	na	na	na	A0A0B2WTZ0	na	na	A0A0B2WUW1	A0A0B2X7X7	na	na	na
1081104	1	0	0	0	0	0	A0A168DA04	na	na	na	na	na	na	na	na	na	A0A168E2X1	A0A167VWI4	na	na	na
1081105	1	0	0	1	0	0	A0A166Y3Y1	na	na	na	na	na	A0A167JLU4	na	na	na	A0A162M146	A0A167G9Z0	na	na	na
1081107	1	0	0	1	0	0	A0A166XAE2	na	na	na	na	na	A0A162HVB5	na	na	na	A0A166YX33	A0A167K7P1	na	na	na
1081108	1	0	0	1	0	0	A0A168AXE4	na	na	na	na	na	A0A168GGR3	na	na	na	A0A162JK17	A0A162JMD3	na	na	na
1081109	1	0	0	1	0	0	A0A168D7D0	na	na	na	na	na	A0A167ZES8	na	na	na	A0A166PSP3	A0A168E7H5	na	na	na
1081613	1	1	0	0	1	0	A0A0B5ENW5	na	A0A0B5EZI8	na	na	na	na	A0A0B5F7L1	na	na	na	na	A0A0B5EWB4	na	na
1081644	1	0	0	0	0	0	I0QZU4	na	na	na	na	na	na	na	na	na	I0R1X2	na	na	na	na
1081904	1	0	1	1	1	1	U2LHZ5	na	na	na	na	U2MUD3	U2KK72	U2L025	U2MQW4	na	na	na	na	na	U2MMG6
1081914	1	0	0	1	0	0	A0A4Q4VPT5	na	na	na	na	na	A0A4Q4VD92	na	na	na	A0A4Q4W709	A0A4Q4WZQ3	na	na	na
1082	1	3	1	1	1	2	A0A1H6GWH6	na	A0A1H6JBX5	A0A1H6J4U8	A0A1H6HIW1	A0A1H6IJ60	A0A1H6HJQ7	A0A1H6HG22	A0A1H6I0P9	A0A1H6JIW2	na	na	na	na	A0A1H6HL99
1082188	0	0	0	1	0	0	na	na	na	na	na	na	A0A7S3FWD2	na	na	na	na	na	na	na	na
1082276	1	0	1	1	1	2	na	A0A4R1R9Q4	na	na	na	A0A4R1R487	A0A4R1RH86	A0A4V2QDU9	A0A4R1R2U3	A0A4R1R916	A0A4R1RIG8	na	na	na	A0A4R1R4V8
1082345	1	2	1	1	1	1	A0A7W9AGC1	na	na	A0A7W9AJV7	A0A7W9AJX0	A0A7W9AFX8	A0A7W9AHG8	A0A7W9AHH5	A0A7W9AEF0	na	na	na	na	na	A0A7W9AEL9
1082479	1	3	1	1	1	1	A0A1G7MG22	na	A0A1G7P137	A0A1G7R6L2	A0A1G7R6N4	A0A1G7SHM3	A0A1G7SHV8	A0A1G7SJA1	A0A1G7SK25	na	na	na	na	na	A0A1G7PP37
1082580	1	2	0	1	1	1	A0A316AP32	na	A0A316AMD8	A0A316AF65	na	na	A0A316AJV2	A0A316AIJ1	A0A316B3J8	na	A0A316AI78	na	na	na	A0A316AQ01
1082703	1	3	1	1	1	1	A0A1X3RZZ6	na	A0A1X3S1E2	A0A1X3S1D3	A0A1X3RMD6	A0A1X3RY03	A0A1X3RX45	A0A1X3RX76	na	A0A1X3RZ94	A0A1X3RYF6	na	na	na	A0A1X3RY80
1082704	1	3	1	1	1	1	A0A1X3RUR8	na	A0A1X3RM35	A0A1X3RM29	A0A1X3RZI0	A0A1X3RV07	A0A1X3RYY3	A0A1X3RYX4	na	A0A1X3S1I9	A0A1X3S3S2	na	na	na	A0A1X3RUG0
1082851	1	3	1	1	0	1	A0A1Y0EQ25	na	A0A1Y0EPT5	A0A1Y0EQ03	A0A1Y0EI88	A0A1Y0ENW3	A0A1Y0EU46	na	A0A1Y0ESM0	na	na	na	na	na	A0A1Y0EI84
1082868	0	0	0	1	0	0	na	na	na	na	na	na	A0A2S5R7B8	na	na	na	na	na	na	na	na
1082931	1	0	0	1	1	1	G4RDH1	na	na	na	na	na	G4R9Q6	G4R9Q7	G4R994	na	G4R7H5	na	na	na	G4REY9
1082933	1	3	1	1	1	1	G6Y857	na	G6YIG0	G6YIG1	G6Y2L5	G6YJA3	G6Y9D5	G6Y9D3	G6YHX1	na	G6Y4T8	na	na	na	G6Y4E7
1084421	1	2	0	1	1	1	A0A3N0DYI6	na	A0A3N0F0E8	A0A3N0E503	na	na	A0A3N0ET93	A0A3N0E4N3	A0A3N0EZZ5	na	na	na	na	na	A0A3N0E7A6
1084736	0	0	1	0	0	0	na	na	na	na	na	I3PCL6	na	na	na	na	na	na	na	na	na
108486	1	0	0	1	0	0	A0A418Q4Z6	na	na	na	na	na	A0A418Q9C6	na	na	na	A0A418Q4U1	na	na	na	na
1085028	0	0	0	0	0	0	na	na	na	na	na	na	na	na	na	na	na	na	na	na	U1QQ15
1085029	0	2	0	0	0	0	na	na	U1PBF0	U1R647	na	na	na	na	na	na	na	na	na	na	U1P7G0
108528	1	3	1	1	1	1	A0A318PS55	na	A0A318Q4L8	A0A318PTJ7	A0A318PZK3	A0A318PV32	A0A318Q0M0	A0A318Q622	A0A318Q5Q2	na	A0A318PUX2	na	na	na	na
1085406	1	3	1	1	1	1	A0A1Z4GM47	na	A0A1Z4GIE9	A0A1Z4GM05	A0A1Z4GMS7	A0A1Z4GLH0	A0A1Z4GFS5	A0A1Z4GKJ4	A0A1Z4GMM5	na	A0A1Z4GBA2	na	na	na	na
1085540	1	3	1	1	1	1	M6U7J6	na	M6UCE8	M6UJ23	M6U5M0	M6UKJ8	M6U8H0	M6UEX4	M6UBP0	na	na	na	na	na	M6UGA7
1085541	1	3	1	1	1	1	N1UU82	na	N1UGM9	N1UJM0	N1UDV4	N1UG59	N1URH6	N1ULJ9	N1UGF0	na	na	na	na	na	N1UJQ9
1085623	1	3	1	1	1	1	G4QIL2	na	G4QLJ1	G4QKN7	G4QKN8	G4QM00	G4QK25	G4QK24	G4QJ99	na	G4QMA6	na	na	na	na
1085644	1	0	0	1	1	1	A0A6M3HTG2	na	na	na	na	na	A0A6M3HU38	A0A6M3HT16	A0A6M3HTD6	na	na	na	na	na	A0A6M3HU65
1085647	1	0	0	1	1	1	A0A4R7L7L0	na	na	na	na	na	A0A4R7LBL1	A0A4R7LIB9	A0A4R7LJ17	na	na	na	na	na	A0A4V3EVG7
1086011	1	2	0	1	1	1	H7FLM9	na	H7FM42	H7FMS0	na	na	H7FLH8	H7FMT6	H7FQ37	na	H7FS52	na	na	na	na
1086013	1	0	0	1	1	1	na	A0A1N7LNF2	na	na	na	na	A0A1N7QSL6	A0A1N7NTJ5	A0A1N7KU09	na	A0A1N7PEB0	na	na	na	A0A1N7QI43
1086030	1	3	1	1	1	2	A0A4P7TL67	na	A0A4V1CTI2	A0A4P7TJD8	A0A4P7TP75	A0A4P7TN60	A0A4P7TSR8	A0A4P7TQZ0	A0A4P7TU13	A0A4P7TNK5	A0A4P7TKD0	na	A0A4P7TIR6	na	A0A4P7TSL8
1086054	1	1	0	1	0	0	X8JUH9	na	X8JP44	na	na	na	X8JMH6	na	na	na	X8J527	X8IYS7	na	na	na
108619	1	3	1	1	1	1	A0A0R9NC57	na	A0A0R9MH25	A0A0R9MWK4	A0A0R9MP25	A0A0R9NXP6	A0A0R9NTX3	A0A0R9N601	A0A0R9MD95	na	A0A0R9NC86	na	A0A0R9N9I1	na	A0A0R9N1J9
1086393	1	1	0	1	1	1	A0A4R6IWQ8	na	A0A4R6IWR5	na	na	na	A0A4R6IWE9	A0A4R6ISE7	A0A4R6J2H1	na	na	na	na	na	A0A4V3C4G6
1086726	1	0	0	1	1	1	A0A0K2JR90	na	na	na	na	na	A0A0K2JR25	A0A0K2JRZ4	na	A0A0K2JT50	na	na	na	na	A0A0K2JRL6
1087	1	2	1	1	1	1	A0A934QKH8	na	A0A934QIB6	na	A0A934UYZ3	A0A934QIW4	A0A934QHR4	A0A934QID6	A0A934QHR1	na	na	na	na	na	A0A934UYV4
1087448	1	3	1	1	1	1	na	K0A9K6	K0AH61	K0AGB8	K0AG32	K0ADX3	K0ADW4	K0AEU2	K0AAT0	na	na	na	K0ACL4	na	K0ADL9
1088540	1	3	1	1	1	1	M3G4B1	na	M3FG61	M3EP27	M3GYV0	M3ES11	M3GE42	M3ETJ5	M3EJX3	na	na	na	na	na	M3GX06
1088542	1	3	1	1	1	1	M6Q6D6	na	M6QAL1	M6QC20	M6Q9S8	M6Q271	M6QJL7	M6Q1N4	M6QFP2	na	na	na	na	na	M6QNX6
1088721	1	2	1	1	1	1	G6EI04	na	na	G6E8L1	G6EC73	G6EE69	G6E6S7	G6E6T1	G6EC09	na	na	na	na	na	G6EAQ2
108875	1	0	0	1	0	0	A0A6J1BRX0	na	na	na	na	na	A0A6J1AE92	na	na	na	A0A6J1AQ49	A0A6J0ZJL9	na	na	na
1088818	1	0	0	0	0	0	A0A2H9ZVU6	na	na	na	na	na	na	na	na	na	A0A2I0AK72	A0A2I0AWH0	na	na	na
1088868	1	3	1	1	1	1	G6F1V8	na	G6F1Y1	G6F1Y3	G6F1Y2	G6EXC0	G6F166	G6F160	G6F180	na	na	na	na	na	na
1088869	1	3	1	1	1	1	G6XFJ4	na	G6XFJ5	G6XFJ7	G6XFJ6	G6XF21	G6XMQ0	G6XMP9	G6XMQ6	na	G6XFN0	na	na	na	na
1088883	1	0	0	1	1	1	A0A153JB17	na	na	na	na	na	A0A153JIS5	A0A153JSC1	A0A153JHA4	na	na	na	na	na	A0A153JS78
108892	1	0	0	0	0	0	A0A9Q5I3G8	na	na	na	na	na	na	na	na	na	A0A9Q5HYY4	A0A9Q5HVT7	na	na	na
1089112	1	3	0	0	0	0	G8I7D4	na	G8I7D2	G8I7D3	G8I7D1	na	na	na	na	na	na	na	na	na	na
1089123	1	3	0	0	0	0	G8I3E4	na	G8I3E2	G8I3E3	G8I3E1	na	na	na	na	na	na	na	na	na	na
1089305	1	2	0	1	1	1	A0A1M5RYX9	na	A0A1M5K3F9	A0A1M5RW91	na	na	A0A1M5JG18	A0A1M5PHK0	A0A1M5LVS8	na	na	na	na	na	A0A1M5LNF5
1089443	2	3	1	0	1	1	G4EUF8	G4F065	G4EX38	G4EX37	G4EX39	G4EX36	na	G4ESZ7	G4EYK8	na	na	na	na	na	G4EUP2
1089449	1	0	0	1	0	0	X0L290	na	na	na	na	na	X0MDC6	na	na	na	X0LEK7	X0MKL5	na	na	na
1089451	1	0	0	1	0	0	X0KF43	na	na	na	na	na	X0JUC9	na	na	na	X0KBL1	X0KE65	na	na	na
1089452	1	0	0	1	0	0	X0AQU0	na	na	na	na	na	W9ZZG3	na	na	na	X0AVL2	X0BL87	na	na	na
1089453	1	0	0	1	0	0	H5U425	na	na	na	na	na	H5U5F4	na	na	na	H5TWE5	na	na	na	H5TVC3
1089455	1	1	0	0	0	0	H5US78	na	H5UNZ1	na	na	na	na	na	na	na	H5UR37	na	na	na	na
1089457	1	0	0	1	0	0	X0H2U2	na	na	na	na	na	X0IGX3	na	na	na	X0HLP2	X0HSK2	na	na	na
1089458	1	0	0	1	0	0	X0B2A1	na	na	na	na	na	X0CLI3	na	na	na	X0C5W4	X0DRT2	na	na	na
1089553	1	0	1	1	1	1	K4LF94	na	na	na	na	K4LJ92	K4LF33	K4LHA8	na	K4LF30	na	na	K4LR43	na	K4LFY7
108980	1	3	1	1	1	2	A0A2N6VB33	na	A0A3D2SI74	A0A3F3L3N0	A0A3D2SJA1	A0A3D2SQE3	A0A3D2SNS3	A0A3D2SL58	A0A3F3L5H6	A0A3D2SN63	na	na	na	na	na
108981	1	3	1	1	1	2	A0A1P8PIN2	na	A0A1P8PKR1	A0A1P8PLB1	A0A1P8PHC5	A0A1P8PL63	A0A1P8PMD6	A0A1P8PMH3	A0A1P8PKX7	A0A1P8PPA1	na	na	na	na	na
1090322	0	3	0	0	0	0	na	na	W9DUV7	W9DU53	W9DMZ2	na	na	na	na	na	na	na	na	na	na
1090375	1	3	1	0	1	1	na	A0A0J7JQK9	A0A0J7JIA5	A0A0J7JGP6	A0A0J7JHE7	A0A0J7JIN8	na	A0A0J7JQ47	A0A0J7JQX7	na	na	na	na	na	na
1090615	1	1	0	1	0	0	A0A1H0NNK6	na	A0A1H0SVU4	na	na	na	A0A1H0MLU3	na	na	na	A0A1H0I373	na	na	na	na
1091006	1	3	1	1	1	1	A0A1Z4L428	na	A0A1Z4L975	A0A1Z4L535	A0A1Z4L755	A0A1Z4LD06	A0A1Z4LE54	A0A1Z4L3A1	A0A1Z4L8L3	na	A0A1Z4L1W9	na	na	na	na
1091042	0	0	0	1	0	0	na	na	na	na	na	na	A0AA44NDP5	na	na	na	na	na	na	na	na
1091494	2	3	1	1	1	1	G4T3K2	G4T2P1	G4SVR1	G4ST28	G4ST29	G4SZH7	G4SZ42	G4SXC1	G4T0W3	na	na	na	na	na	na
1091495	2	3	1	1	1	1	I7JMS9	I7IKD4	I7JNR2	I7IC98	I7ILK8	I7JNK3	I7JMW7	I7IC29	na	I7IKE3	na	na	na	na	na
1091497	2	3	1	1	1	1	I7IB71	I7JIW5	I7IBC0	I7JQB8	I7JKP3	I7JK61	I7IAU2	I7JNM8	na	I7IAR9	na	na	na	na	na
109152	1	1	0	1	0	0	A0A8T1VGK7	na	A0A8T1XB86	na	na	na	A0A8T1VPJ1	na	na	na	na	A0A8T1WS96	na	na	na
1092	1	2	1	0	1	0	A0A101JTL3	na	A0A101JPD5	na	A0A101JPG8	A0A124GAT4	na	A0A101JQN0	na	na	na	na	na	na	na
109232	1	3	1	1	1	1	A0A0B7J0J3	na	A0A0B7IYW9	A0A0B7J1C3	A0A0B7IX01	A0A0B7J3M2	A0A0B7IZ80	A0A0B7J2J8	na	A0A0B7J1J7	na	na	na	na	A0A0B7IYJ9
109264	1	0	0	1	0	0	A0A1F7ZZH9	na	na	na	na	na	A0A1F7ZIT0	na	na	na	A0A1F7ZXZ9	A0A1F8AHN6	na	na	na
109280	1	1	0	1	0	0	A0A3Q2YQ74	na	A0A3Q2XCM5	na	na	na	A0A3Q2Y4B2	na	na	na	na	A0A3Q3DCU5	na	na	na
1093141	0	1	0	0	0	0	na	na	K8Z8U6	na	na	na	na	na	na	na	na	na	na	na	na
109328	1	0	0	1	1	1	A0A510K299	na	na	na	na	na	A0A510KM77	A0A510JZ48	na	A0A510K0Q0	na	na	na	na	A0A510KYX6
109376	1	0	0	0	0	0	A0A0D3AF67	na	na	na	na	na	na	na	na	na	A0A0D2ZTZ8	na	na	na	na
1093900	1	0	0	1	0	0	A0A507AHU2	na	na	na	na	na	A0A507AWB8	na	na	na	A0A507B3P3	A0A507B3J5	na	na	na
1094	1	3	1	1	1	1	A0A432AU23	na	A0A3S0NIG4	A0A3S0N9T0	A0A3S0MQL0	A0A3S0NBB2	A0A3S0NAT8	A0A3S0NAE8	A0A432AVI6	na	na	na	na	na	na
1094342	1	3	1	1	1	1	na	A0A9Q3ZGE9	A0A9Q3W271	A0A9Q3W8X4	A0A9Q3W509	A0A9Q3W7R8	A0A9Q3W6W3	A0A9Q3W5M9	A0A9Q3W2B6	na	na	na	na	na	na
1094350	1	0	0	1	0	0	A0A9P4YTH3	na	na	na	na	na	A0A9P4YWF5	na	na	na	A0A9P4YV55	A0A9P4Z336	na	na	na
1094466	1	2	0	1	1	1	H8XSB0	na	H8XP16	H8XSL4	na	na	H8XU77	H8XSJ9	H8XQ44	na	na	na	na	na	H8XQA6
1094489	1	0	0	1	0	0	M1NT47	na	na	na	na	na	M1NYU8	na	na	na	na	na	na	na	M1N5D3
1094491	1	0	0	1	0	0	N6UIJ6	na	na	na	na	na	N6UIZ7	na	na	na	na	na	na	na	N6UCK3
1094492	1	0	0	1	0	0	N6UU26	na	na	na	na	na	N6VRM7	na	na	na	na	na	na	na	N6UIN0
1094496	1	0	0	1	0	0	N6UND6	na	na	na	na	na	N6VEY8	na	na	na	na	na	na	na	N6UKG1
1094502	1	0	0	1	0	0	N6UQK7	na	na	na	na	na	N6VVC9	na	na	na	na	na	na	na	N6UL08
1094508	1	1	1	1	1	1	I3VTX8	na	I3VTY1	na	na	I3VYD9	I3VVZ7	I3VVZ6	I3VY97	na	na	na	I3VRF5	I3VRE8	na
1094551	1	0	0	1	0	0	J1IV41	na	na	na	na	na	J1IX53	na	na	na	na	na	na	na	J0PWU3
1094552	1	0	0	1	0	0	J0YRZ8	na	na	na	na	na	J0YS38	na	na	na	na	na	na	na	J1IXR0
1094555	1	0	0	1	0	0	J0RIG2	na	na	na	na	na	J1K9T2	na	na	na	na	na	na	na	J1KG91
1094556	1	0	0	1	0	0	J0ZGM7	na	na	na	na	na	J0QKG8	na	na	na	na	na	na	na	J0QVA9
1094557	1	0	0	1	0	0	J0QVH5	na	na	na	na	na	J0R3C0	na	na	na	na	na	na	na	J0R8I1
1094558	1	0	0	1	1	1	J0ZQ50	na	na	na	na	na	J1JVG8	J0ZKR7	J1K041	na	na	na	na	na	J1K243
1094560	1	0	0	1	0	0	A0A9P2S069	na	na	na	na	na	A0A9P2W3B2	na	na	na	na	na	na	na	A0A9P2W352
1094562	1	0	0	1	0	0	J0QXP3	na	na	na	na	na	J0QXT6	na	na	na	na	na	na	na	J1JX89
1094563	1	0	0	1	0	0	J0Q7Q8	na	na	na	na	na	J0PWR3	na	na	na	na	na	na	na	J1J4S0
1094564	1	0	0	1	0	0	J0QLM9	na	na	na	na	na	J0QLH1	na	na	na	na	na	na	na	J0QI80
109461	1	1	0	1	0	0	A0A7M7KJ65	na	A0A7M7KUX8	na	na	na	A0A7M7JL69	na	na	na	na	A0A7M7K5T3	na	na	na
1094619	1	1	0	1	0	0	G5A175	na	G4YL65	na	na	na	G5A680	na	na	na	na	G4ZVW4	na	na	na
109472	1	3	1	1	1	1	A0A4R2N1A9	na	A0A4V6NQ85	A0A4R2N0A8	A0A4R2N099	A0A4R2N1A1	A0A4R2N3J1	A0A4R2N3E5	na	A0A4R2MSQ8	na	na	na	na	A0A4R2N275
1094755	1	0	0	1	0	0	J0YLW4	na	na	na	na	na	J1J6Y7	na	na	na	na	na	na	na	J1J8A6
109478	0	1	0	1	0	0	na	na	S7MCE5	na	na	na	S7NZQ2	na	na	na	na	S7MX49	na	na	na
1094979	1	3	1	1	1	1	G6YSU2	na	G6YRP3	G6YZ25	G6YZ24	G6YV70	G6YV86	G6YV85	G6YUK4	na	na	na	na	na	na
1095	1	3	1	1	1	1	A0A533T7A8	na	A0A533T662	A0A533T8D5	A0A533T5W2	A0A533T5B3	A0A533T5K4	A0A533T3H3	A0A533TB98	na	na	na	na	na	na
1095194	1	0	0	1	0	0	A0A9P6LLH7	na	na	na	na	na	A0A9P6LQI5	na	na	na	A0A9P6I7R8	A0A9P6HZJ7	na	na	na
1095383	1	3	1	1	1	1	A0A7U9EQM4	na	A0A7U9HUT5	A0A7U9EPK1	A0A7U9EPJ8	A0A7U9HU88	A0A7U9ET93	A0A7U9EVB3	A0A7U9EQG8	na	na	na	A0A7U9ERA0	A0A7U9EX29	na
1095465	1	0	0	0	0	0	A0A4S4LQT5	na	na	na	na	na	na	na	na	na	A0A4S4LEK1	A0A4S4KYK9	na	na	na
1095629	1	0	0	1	0	0	A0A0C9XU66	na	na	na	na	na	A0A0C9XUV1	na	na	na	A0A0C9XAN5	A0A0C9XW99	na	na	na
1095630	1	0	0	1	0	0	A0A2J6SPT8	na	na	na	na	na	A0A2J6TIN0	na	na	na	A0A2J6SLJ9	A0A2J6SVA1	na	na	na
1095631	1	0	0	0	0	0	H0GGZ4	na	na	na	na	na	na	na	na	na	H0GEL1	na	na	na	na
1095726	1	3	1	1	1	1	I2J3T4	na	I2J3W0	I2J3T5	I2J3V9	I2J3U8	I2J5F8	I2J3P1	na	I2J5X9	na	na	I2J7U7	I2IYS0	na
1095727	1	3	1	1	1	1	I2J350	na	I2J1J2	I2J1P1	I2J1G9	I2J1K2	I2J2F2	I2J5K2	na	I2J353	na	na	I2J4H7	I2J8D8	na
1095729	0	0	0	1	1	1	na	na	na	na	na	na	I0SIF9	I0SBF5	na	I0SAJ8	na	na	I0S5X4	I0SJ01	na
1095731	0	0	0	1	1	1	na	na	na	na	na	na	A0A0E2IQV5	A0A0E2IVK1	na	A0A0E2IRI5	na	na	A0A0E2ISF9	A0A0E2IS12	na
1095733	1	0	0	1	1	1	I2NCJ6	na	na	na	na	na	I2NL65	I2NHS1	I2NRE0	na	na	na	I2NRG6	I2NT31	na
1095735	1	3	1	1	1	1	I0SLP0	na	I0S947	I0S9A3	I0S9A6	I0S955	I0SCY0	I0SL60	na	I0SEQ3	na	na	I0S7J2	I0S803	na
1095736	1	3	1	1	1	1	I0SX74	na	I0T0P0	I0T0Q0	I0T0R7	I0T0Q4	I0SXN9	I0T1Q4	na	I0SVJ4	na	na	I0SWI8	I0SZU2	na
1095737	1	3	1	1	1	1	I0T977	na	I0T4B8	I0T4A9	I0T4D1	I0T4C4	I0T786	I0T6R8	na	I0T8F0	na	na	I0T8B6	I0T731	na
1095738	1	3	1	0	1	1	I0SUU4	na	I0STV0	I0SU32	I0STX8	I0SU98	na	I0SQU1	na	I0SMP3	na	na	na	I0SSQ5	na
1095741	1	3	1	1	1	1	I0Q232	na	I0Q508	I0Q534	I0Q587	I0Q523	I0Q1N3	I0Q4X5	na	I0Q5F7	na	na	I0Q289	I0Q2D6	na
1095743	1	3	1	1	1	1	I2NJ71	na	I2NFS2	I2NFU8	I2NFN6	I2NK03	I2NFS9	I2NNN2	na	I2NH76	na	na	na	na	I2NP08
1095744	1	3	1	1	1	1	I3DN72	na	I3DP92	I3DP35	I3DP59	I3DJ81	I3DP42	I3DP93	na	I3DPB8	na	na	na	na	I3DBX0
1095748	1	3	0	1	1	1	na	I2NXD8	I2NS72	I2NS68	I2NWP8	na	I2NME3	I2NR21	na	I2NX42	na	na	na	na	na
1095749	1	3	1	1	1	1	I3DIA3	na	I3D6J7	I3D6B2	I3D698	I3DII3	I3DCE3	I3DCE9	na	I3DAN1	I3DFB6	na	na	na	I3DIX8
1095750	0	0	0	1	1	1	na	na	na	na	na	na	I0R7V5	I0R7N9	na	I0RAP2	na	na	I0R858	I0R6R6	na
1095752	1	1	1	1	1	1	I0TEJ2	na	na	na	I0TEC6	I0TDD5	I0TCC1	I0TEV9	I0TCL5	na	na	na	na	na	I0TDD1
1095776	0	3	0	0	0	0	na	na	A0A1G8WUF1	A0A1G8WUC9	A0A1G8WTN3	na	na	na	na	na	A0A1G9EQR2	na	na	na	A0A1G9C1A4
1095777	1	1	1	1	1	1	A0A840QNF2	na	na	na	A0A840QUA4	A0A840QTJ4	A0A840QPB6	A0A840QPE5	A0A840QPV2	na	A0A840QM53	na	na	na	A0A840QUD2
1095778	0	3	0	0	0	0	na	na	A0A1H1BJZ3	A0A1H1BLE4	A0A1H1BLI2	na	na	na	na	na	na	na	na	na	A0A1H0YUY6
1096243	1	3	1	1	1	2	na	A0A432YU20	A0A432YWC5	A0A432YVN2	A0A432YVM6	A0A432YVT1	A0A432YS13	A0A432YRL5	A0A432YHH3	A0A432YMC4	na	na	na	na	na
1096246	0	1	0	1	1	1	na	na	A0A2V3Y856	na	na	na	A0A2V3XXU2	A0A2V3Y0L4	na	A0A2V3Y3G0	A0A2V3XWR8	na	A0A2V3XY58	A0A2V3Y2S6	na
109634	0	0	0	1	0	0	na	na	na	na	na	na	A0A9P5NU58	na	na	na	A0A9P5P528	A0A9P5NMY0	na	na	na
1096341	1	3	1	1	1	1	na	A0A4R7KD17	A0A4R7KAF9	A0A4R7KVP2	A0A4R7KU57	A0A4R7KPQ1	A0A4R7K9F6	A0A4V3ERV5	A0A4V3ETD0	na	na	na	A0A4R7K8K2	A0A4R7KPS8	na
109636	1	0	0	1	0	0	A0A9P5Z7G0	na	na	na	na	na	A0A9P5YMK5	na	na	na	A0A9P5YRK0	A0A9P5Z8P6	na	na	na
1096546	1	3	1	1	1	1	I9CFM9	na	I9WYJ6	I9WWP7	I9CQ68	I9LEC6	I9CND5	I9WYM9	I9CN18	na	na	na	na	na	I9WZN7
109663	0	0	0	1	0	0	na	na	na	na	na	na	A0A5F1B6E1	na	na	na	na	na	na	na	na
1096750	1	2	0	1	1	1	A0A512RIJ9	na	A0A512RJV5	A0A512RJZ7	na	na	A0A512RK46	A0A512RKA4	A0A512RQZ3	na	na	na	na	na	A0A512RNN7
1096779	1	3	1	1	1	2	A0A240EC24	na	A0A240E883	A0A240E5E5	A0A240E7D4	A0A240E4N4	A0A240E3A8	A0A240E3U8	A0A240EAL2	A0A240EBJ1	na	na	na	na	na
1096856	1	1	0	0	0	0	A0A0P0SJC7	na	A0A0P0SC79	na	na	na	na	na	na	na	A0A0N7JZN8	na	na	na	na
1096929	1	0	0	1	1	1	A0A1Y6ETK4	na	na	na	na	na	A0A1Y6ES23	A0A1Y6ERN1	A0A1Y6GAM8	na	A0A1Y6EHH4	na	na	na	A0A1Y6G899
1096930	1	2	1	1	1	1	T0IC38	na	na	T0IUX1	T0J3T2	T0I5T3	T0IBK0	T0IHF5	T0IES1	na	na	na	na	na	T0HUH1
1097556	1	0	0	0	0	0	R4XFV0	na	na	na	na	na	na	na	na	na	R4XGP4	R4XE45	na	na	na
1097667	1	0	0	1	0	0	H0E3X7	na	na	na	na	na	H0E681	na	na	na	na	H0E0Z1	na	na	na
1097677	1	0	0	0	0	0	M5B755	na	na	na	na	na	na	na	na	na	M5B7J8	na	na	na	na
109790	0	0	0	0	0	0	na	na	na	na	na	na	na	na	na	na	A0A558IG36	na	A0A5N1I795	na	na
1098	1	3	1	1	1	1	A0A5C4RYP7	na	A0A5C4RZ76	A0A5C4S3P0	A0A5C4RXD8	A0A5C4S144	A0A5C4S2G5	A0A5C4S015	A0A5C4S4H7	na	na	na	na	na	na
109895	1	1	0	0	0	0	A0A507E7M4	na	A0A507DW49	na	na	na	na	na	na	na	A0A507DXQ8	A0A507DSU9	na	na	na
1099794	0	0	0	1	0	0	na	na	na	na	na	na	A0AA37SU72	na	na	na	na	na	na	na	na
1099853	1	1	0	1	1	1	A0A354M586	na	na	na	A0A316R469	na	A0A354M525	A0A354M0A5	A0A354M242	na	na	na	na	na	A0A354M4K2
1100	1	3	1	1	1	1	A0A165LTF3	na	A0A165LFE4	A0A165LYK4	A0A165MDQ5	A0A165LIY4	A0A165LEN3	A0A165LQD6	A0A165LYA0	na	na	na	na	na	na
1100699	1	0	1	0	0	1	A0A315E3G4	na	na	na	na	A0A315DY67	na	na	A0A315DPC0	na	na	na	na	na	na
1100704	2	1	1	1	1	1	A0A315EKS6	A0A315F229	na	na	A0A315F0R7	A0A315DWF7	A0A315EJM9	A0A315ELK7	A0A315EW84	na	na	na	na	na	na
1100706	1	1	1	1	1	1	A0A2M6VSW3	na	na	na	A0A2M6VYY1	A0A2M6VZA8	A0A2M6VPF3	A0A2M6VPE2	A0A2M6VZ69	na	na	na	na	na	na
1100707	1	3	1	1	1	1	A0A2M6VKS6	na	A0A2M6VDK6	A0A2M6VDD3	A0A2M6V0Q6	A0A2M6VJV8	A0A2M6V1X1	A0A2M6V289	A0A2M6VAN7	na	na	na	na	na	na
1100711	1	1	1	1	1	1	A0A2M6V6B7	na	na	na	A0A2M6VFB1	A0A2M6VBW2	A0A2M6V135	A0A2M6V0Z9	A0A2M6V4W7	na	na	na	na	na	na
1100718	1	3	1	1	1	1	A0A315F209	na	A0A315EEC8	A0A315EGH3	A0A315EJ02	A0A315F119	A0A315EA88	A0A315ECP6	A0A315EM52	na	na	na	na	na	na
1100720	1	2	1	1	1	1	A0A2T7SV36	na	A0A2T7T0Y0	na	A0A2T7SVN6	A0A2T7T184	A0A2T7SVS9	A0A2T7SVZ7	A0A2T7T3N1	na	na	na	na	na	na
1100724	1	1	1	1	1	1	A0A315ANS0	na	na	na	A0A315ACJ9	A0A315AWU3	A0A315ACT8	A0A315AF43	A0A315AMV1	na	na	na	na	na	na
1100725	1	1	1	1	1	1	A0A315ASS5	na	na	na	A0A315AY68	A0A315AHW9	A0A315AS58	A0A315B0T4	A0A315ANW7	na	na	na	na	na	na
1100726	1	1	1	1	1	1	A0A315AYV6	na	na	na	A0A315B8D5	A0A315B396	A0A315B3K1	A0A315CFM8	A0A315BKU3	na	na	na	na	na	na
1100822	1	3	0	0	1	0	A0A1C6N169	na	A0A1C6QQD5	A0A1C6QQE0	A0A1C6QQU2	na	na	A0A1C6R4Z9	na	na	A0A1C6LTN2	na	A0A1C6QEB5	na	A0A1C6QQR0
1100824	1	1	0	0	0	0	A0A1C6MK24	na	A0A1C6MSP7	na	na	na	na	na	na	na	A0A1C6MKV1	na	A0A1C6QE33	na	na
1100828	1	0	0	0	1	0	A0A1A9CHV5	na	na	na	na	na	na	A0A1A9C857	na	na	na	na	A0A1A9CDI5	na	na
1100841	1	3	1	1	1	2	A0A7U4BPF8	na	A0A7U4F6N4	A0A7U4BPU8	A0A7U4F7L8	A0A7U4BPD2	A0A7U4BQI9	A0A7U4F8Z3	A0A7U4F7E4	A0A7U4BM94	na	na	na	na	na
1101195	1	3	1	1	1	1	na	Y0KF23	Y0KHB9	Y0KJZ5	Y0KK56	Y0KGN6	Y0KF43	Y0KF22	Y0KH33	na	na	na	na	na	Y0KIF7
1101274	1	0	0	1	0	0	A0A8H5VPP3	na	na	na	na	na	A0A8H5W6I1	na	na	na	A0A8H5VBS5	A0A8H5VAC9	na	na	na
1101373	1	0	1	1	1	1	A0A1A6DUL1	na	na	na	na	A0A1A6DTN1	A0A1A6DWU2	A0A1A6DWB9	A0A1A6DSL5	na	na	na	na	na	A0A1A6DS49
1101402	1	2	0	1	1	1	A0A328Y8B9	na	A0A328YAJ7	A0A328YFW8	na	na	A0A328YDK9	A0A328YMV7	A0A328YMD4	na	na	na	na	na	A0A328YCI3
1101443	2	3	1	1	1	2	A0A3G2W110	A0A3G2WBM2	A0A3G2W9I9	A0A3G2W3F2	A0A3G2WB06	A0A3G2W1X4	A0A3G2W646	A0A3G2W4R2	A0A3G2W644	A0A3G2WFW2	A0A3G2W7H5	na	na	na	A0A3G2W6X6
110163	0	3	0	0	0	0	na	na	A0A9E7MW14	A0A9E7SNC0	A0A9E7MWN2	na	na	na	na	na	na	na	na	na	na
1102	1	2	1	1	1	0	A0A831STW4	na	A0A831SQ98	na	A0A831SQ42	A0A831SSX1	A0A831SSN2	A0A831STX4	na	na	na	na	na	na	na
110319	1	0	0	0	1	0	R7XZZ3	na	na	na	na	na	na	R7XTS3	na	na	na	na	R7XV49	na	na
110321	1	3	1	1	1	1	A0A508WWB4	na	A0A508X403	A0A508X4W9	A0A508X474	A0A508X0S2	A0A508WSS7	A0A508WXI2	A0A508X1X0	na	A0A508WNM7	na	na	na	A0A508WW90
110322	1	3	1	1	1	1	A0A6N7LNR6	na	A0A6N7LBH8	A0A6N7L8E5	A0A6N7LB38	A0A6N7LEB2	A0A6N7LH56	A0A6N7LHN0	A0A6N7LNE1	na	A0A6N7L7W6	na	na	na	A0A6N7LLX1
110365	1	0	0	1	0	0	A0A023BDA6	na	na	na	na	na	A0A023BD93	na	na	na	na	na	na	na	na
110368	1	1	0	1	0	0	A0A6J1P4G5	na	A0A6J1NWK1	na	na	na	A0A6J1PA43	na	na	na	na	A0A6J1NE07	na	na	na
1104152	1	0	0	0	0	0	H0EHB4	na	na	na	na	na	na	na	na	na	H0EFC0	H0EUZ2	na	na	na
1104322	1	0	0	1	1	1	G8P2X4	na	na	na	na	na	G8P4C9	G8P8H3	na	G8P4P5	na	na	G8P458	G8P629	na
1104324	1	2	1	0	0	0	G7VFN8	na	na	G7VAZ6	G7VFY7	G7VC19	na	na	na	na	na	na	na	na	G7VAQ6
1104446	0	0	0	1	1	0	na	na	na	na	na	na	A0A386PNH0	A0A386PLV4	na	na	na	na	na	na	A0A386PKB8
110450	1	0	0	1	0	0	A0A6G1BS80	na	na	na	na	na	A0A6G1DLG6	na	na	na	A0A6G1CDZ4	A0A6G1F7I5	na	na	na
1104996	1	3	1	0	1	1	A0A0K8N5M1	na	A0A0K8N4K5	A0A0K8N494	A0A0K8N4C1	A0A0K8N4Q1	na	A0A0K8N5H4	A0A0K8N5A8	na	A0A0K8MZB0	na	na	na	na
110500	1	3	0	0	0	0	A0A101HVV4	na	A0A101HVP7	A0A101HW69	A0A101HV72	na	na	na	na	na	na	na	na	na	na
1105030	1	0	0	1	0	0	J3J6X5	na	na	na	na	na	J3J7W7	na	na	na	na	na	na	na	J3J7Y1
1105031	1	1	0	1	1	1	J1HAQ6	na	J0N2Y7	na	na	na	J1H4S6	J0N5T9	na	J0N0J6	na	na	J0N7N0	J0N5X0	na
1105032	1	3	1	1	1	1	J7SIW6	na	J4Q447	J4J1B8	J4X7M2	J4X7J6	J7TTI9	J4Q1B4	na	J4Q2Z6	na	na	J4NT34	J4J2G6	na
110505	1	1	0	0	1	0	A0A2G8B854	na	A0A2G8B8B0	na	na	na	na	A0A2G8BC23	na	na	A0A2G8BII6	na	na	na	na
1105109	1	3	1	1	1	1	H8LND6	na	H8LM62	H8LQ45	H8LPQ1	H8LP50	H8LPR1	H8LMB7	na	H8LMY3	na	na	na	na	na
1105110	1	3	1	1	1	1	H8K7T5	na	H8K8M0	H8K6U9	H8K6H3	H8K948	H8K9W2	H8K8F7	na	H8K9C9	na	na	na	na	H8K955
1105111	1	3	1	1	1	1	H8K541	na	H8K4B6	H8K2M2	H8K362	H8K439	H8K390	H8K4F9	na	H8K3K1	na	na	na	na	na
1105112	1	3	1	1	1	1	H6QJI9	na	H6QL20	H6QIJ3	H6QI78	H6QKQ2	H6QI57	H6QL64	na	H6QKC3	na	na	na	na	na
1105114	1	3	1	1	1	1	H8KDG1	na	H8KC97	H8KBP7	H8KCG8	H8KBH9	H8KCJ1	H8KCL5	na	H8KAV8	na	na	na	na	H8KBR3
1105143	1	0	0	0	1	0	A0A7X5VHS2	na	na	na	na	na	na	A0A7X5ZZ07	na	na	A0A7X5V712	na	na	na	na
1105145	1	1	0	0	0	0	A0A7W9HS40	na	A0A7W9M5D9	na	na	na	na	na	na	na	A0A7W9HNQ5	na	na	na	A0A7W9HVR7
1105204	1	3	1	1	1	1	A0A2P8KM19	na	A0A2P8KLX6	A0A2P8KLZ9	A0A2P8KRH9	A0A2P8KFV1	A0A2P8KMJ8	A0A2P8K6G0	A0A2P8KTI0	na	na	na	na	na	na
1105367	1	0	1	1	1	0	na	A0A086XSN0	na	na	na	A0A086XSC9	A0A086XZQ3	A0A086Y0K4	na	na	A0A086XTE2	na	na	na	A0A086Y688
110539	1	0	0	1	0	0	A0A5S9MVY0	na	na	na	na	na	A0A5S9PCH8	na	na	na	A0A5S9R497	na	na	na	A0A5S9PI85
110662	0	1	1	1	1	1	na	na	na	na	Q3AGF3	Q3AHI8	Q3AN18	Q3AI33	Q3ANP3	na	na	na	na	na	na
110676	0	1	0	0	0	0	na	na	A0A7K8PRB3	na	na	na	na	na	na	na	na	A0A7K8PHF1	na	na	na
1107311	1	2	0	1	1	1	V6S876	na	A0A0A2MX16	V6S310	na	na	V6S9H4	V6S323	A0A0A2MY76	na	na	na	na	na	V6S9Q1
1107881	1	3	1	1	1	1	H0G7Y2	na	H0FYF7	H0FYF8	H0FYF6	H0G7M6	H0G0K9	H0G0K8	H0G0V8	na	H0FXB4	na	na	na	H0FX12
1107882	1	1	1	1	1	1	H0HWG1	na	H0HUG4	na	na	H0HUX8	H0HVI0	H0HVH8	H0HJC3	na	H0HIX5	na	na	na	H0HMM0
110799	1	1	0	1	0	0	A0A8S3WH78	na	A0A8S3WRD5	na	na	na	A0A8S3WZL9	na	na	na	na	A0A8S3WBW7	na	na	na
1108044	1	0	0	1	0	0	H5TGF8	na	na	na	na	na	H5TMX3	na	na	na	H5TNE7	na	na	na	H5THT6
1108045	1	0	0	1	0	0	K6WB02	na	na	na	na	na	K6X0L0	na	na	na	K6V4C5	na	na	na	K6VCE8
1108050	1	1	0	1	0	0	A0A0B7FNX6	na	A0A0B7FPZ3	na	na	na	A0A0B7FT13	na	na	na	A0A0B7FCA3	A0A0B7F7C1	na	na	na
1108140	2	3	1	1	1	0	A0A1J9NLU0	A0A1J9NR06	A0A1J9NR41	A0A1J9PS04	A0A1J9NRM1	A0A1J9PLN6	A0A1J9NTL5	A0A1J9PWW3	na	na	na	na	na	na	na
110845	0	0	0	1	1	1	na	na	na	na	na	na	A0A6V7RGU5	A0A6V7RGF5	A0A6V7RN61	na	A0A6V7RCD6	na	A0A6V7RD92	A0A6V7RC93	na
1108595	1	3	1	1	1	1	A0A1D9LCP6	na	A0A1D9LFH4	A0A1D9LFG3	A0A1D9LFD3	A0A1D9LG50	A0A1D9LL77	A0A1D9LKF9	A0A1D9LG76	na	na	na	na	na	A0A1D9LDR8
1108812	1	0	0	0	0	0	A0A1X1Y9Y0	na	na	na	na	na	na	na	na	na	A0A1X1YRN2	na	na	na	na
1108963	0	0	0	1	1	1	na	na	na	na	na	na	H7G0A6	H7G0A7	na	H7G198	H7FY20	na	H7FZ64	H7FZI0	na
1109041	1	1	0	0	0	0	A0A7K9SFM6	na	A0A7K9SGV6	na	na	na	na	na	na	na	na	A0A7K9T0S8	na	na	na
1109342	1	1	0	1	0	0	A0A6B2E8M4	na	A0A6B2E456	na	na	na	A0A6B2EID8	na	na	na	na	A0A6B2E645	na	na	na
110935	1	0	0	0	0	0	A0A1T4XL95	na	na	na	na	na	na	na	na	na	A0A1T4XX92	na	na	na	na
1109412	1	3	1	1	1	1	A0A0G4K2G2	na	A0A0G4JWX4	A0A0G4JW73	A0A0G4JQ54	A0A0G4JQ18	A0A0G4JPS8	A0A0G4JPT8	A0A0G4JVT2	na	A0A0G4JTD4	na	na	na	A0A0G4JSL3
1109443	1	0	0	0	0	0	G4TIH2	na	na	na	na	na	na	na	na	na	G4T5K6	G4T789	na	na	na
1109740	1	2	0	1	1	1	A0A238XPD7	na	A0A238VYE0	A0A238YZT4	na	na	A0A238Y232	A0A238XTQ0	A0A238VSC6	na	na	na	na	na	A0A238XVH5
111015	1	0	0	0	0	0	A0A0X8JGZ6	na	na	na	na	na	na	na	na	na	A0A0X8JE37	na	na	na	na
1110502	2	3	1	1	1	1	I3TQY2	I3THX7	I3TR87	I3TXT3	I3TXT5	I3TQ97	I3TKX4	I3TKX3	I3TGZ0	na	I3TI68	na	na	na	I3THC0
1110505	1	0	0	1	0	0	G7HYB5	na	na	na	na	na	G7HVR8	na	na	na	G7HVH1	na	na	na	G7HUZ9
1110509	0	3	0	0	0	0	na	na	G7WN59	G7WN61	G7WN26	na	na	na	na	na	na	na	na	na	G7WNU8
1110546	1	3	1	1	1	1	A0A2S7ZR30	na	A0A2S7ZRA1	A0A2S7ZQZ2	A0A2S7ZQ50	A0A2S7ZLL3	A0A2S7ZRT8	A0A2S7ZRV2	A0A2S7ZLL2	na	na	na	A0A2S7ZMS2	A0A2S7ZPT1	na
1110697	1	0	0	1	0	0	U5EBG6	na	na	na	na	na	U5EEJ5	na	na	na	U5EJ27	na	na	na	U5EBU5
111105	1	3	1	1	1	1	A0A099WQY3	na	A0A0A2FXR3	A0A0A2EEF3	A0A0A2F9D1	A0A099WQP0	A0A099WSF3	A0A0A2EFF5	A0A0A2F5F8	na	na	na	na	na	na
1111068	1	3	1	1	1	1	G8MZN4	na	G8MYS9	G8MYT0	G8MYS8	G8MYT1	G8N3I1	G8N3I2	G8N5M5	na	na	na	G8MZS5	G8N5X5	na
1111069	1	0	0	1	1	1	G8NC50	na	na	na	na	na	G8NCH0	G8NCZ4	G8N9V4	na	na	na	na	na	G8N9J7
1111071	1	0	1	1	1	1	A0A1Q8Y9N5	na	na	na	na	A0A1Q8YKE9	A0A1Q8YIY1	A0A1Q8YIF4	A0A1Q8YE98	na	na	na	A0A1Q8YIF1	na	A0A1Q8YAF2
1111077	1	0	0	1	0	0	M1W467	na	na	na	na	na	M1WFF2	na	na	na	M1VX38	M1W4R4	na	na	na
1111133	0	0	0	1	1	1	na	na	na	na	na	na	U7UXX3	U7UWL0	na	U7UZK0	na	na	U7UZX4	U7UXK8	na
1111134	0	0	0	1	1	1	na	na	na	na	na	na	U7UBH9	U7UBI9	na	U7UBT0	na	na	U7UGN7	U7UNI4	na
1111135	1	1	0	1	1	1	U2VI65	na	U2VGU8	na	na	na	U2U0L3	U2U1F8	na	U2V9X8	na	na	U2TEH0	na	U2U1E1
1111137	1	1	1	1	1	1	J6II80	na	na	na	J6IDV4	J6ILX9	J4XJT7	J6IV40	na	J6IV47	na	na	J5Y7X4	na	J4XBJ4
111125	1	1	0	1	0	0	A0A821KP76	na	A0A822EEA2	na	na	na	A0A821N5Q0	na	na	na	na	A0A822BR09	na	na	na
1111454	1	3	1	1	1	1	U7UQT1	na	U7UTC5	U7UUJ4	U7UT15	U7UTB6	U7UEK2	U7UEQ4	U7UIY4	na	U7UCD8	na	U7URI2	U7UUY7	na
1111708	1	3	1	1	1	1	Q55759	na	Q55798	P73667	Q55468	Q55978	Q55983	Q55850	P73526	na	na	na	na	na	na
1111760	1	3	1	1	1	1	A0A1L7LJQ4	na	A0A1L7LJS3	A0A1L7LJR9	A0A1L7LK84	A0A1L7LJR1	A0A1L7LLM1	A0A1L7LKK0	A0A1L7LIH6	na	na	na	A0A1L7LHJ2	A0A1L7LHZ0	na
1112	1	2	1	1	1	1	A0A192D859	na	na	A0A192D046	A0A192D253	A0A192D4R2	A0A192D6K8	A0A192D4S5	A0A192D2P9	na	na	na	na	na	A0A192D798
1112204	1	0	0	1	0	0	H6MVN7	na	na	na	na	na	H6N067	na	na	na	H6N2H2	na	na	na	H6MSI4
1112230	0	0	0	0	0	0	na	na	na	na	na	na	na	na	na	na	na	na	na	na	A0A656K832
1112244	0	0	0	0	0	0	na	na	na	na	na	na	na	na	na	na	na	na	na	na	A0A656IT44
1112246	0	0	0	1	0	0	na	na	na	na	na	na	A0AA37A4Z0	na	na	na	na	na	na	na	na
1112836	1	1	0	0	0	0	A0A7L2Y5G4	na	A0A7L2XJ23	na	na	na	na	na	na	na	na	A0A7L2X733	na	na	na
1113587	0	0	0	1	1	2	na	na	na	na	na	na	A0A4Y3JP78	A0A4Y3JKX4	A0A4Y3JQZ8	A0A4Y3JKK7	A0A4Y3JRA5	na	A0A4Y3JIR2	A0A4Y3JKC9	na
1113929	1	2	0	1	1	1	A0A2I9DKF2	na	A0A2I9E8U9	A0A2I9DI41	na	na	A0A2I9E4L2	A0A2I9EG32	A0A2I9E934	na	na	na	na	na	A0A2I9E0T7
111463	1	0	0	0	0	0	A0A9P8NBA5	na	na	na	na	na	na	na	na	na	A0A9P8N618	A0A9P8MT60	na	na	na
1114856	0	3	0	0	0	0	na	na	L9VL92	L9VNV7	L9VLR6	na	na	na	na	na	L9VVH3	na	na	na	L9WF04
1114861	1	2	0	1	1	1	A0A6J4GLN3	na	A0A6J4GG30	A0A6J4GGG1	na	na	A0A9W4X812	A0A6J4GFK1	A0A6J4G6B5	na	na	na	na	na	A0A6J4G6D6
1114873	1	3	0	1	1	1	A0A1S1J968	na	A0A1S1J508	A0A1S1J8F4	A0A1S1J8Y8	na	A0A1S1J172	A0A1S1J8D4	A0A1S1J908	na	na	na	na	na	A0A1S1J8T4
1114924	1	1	1	1	1	1	A0A1I3MZC4	na	A0A1I3H223	na	na	A0A1I3F6C7	A0A1I3PMH4	A0A1I3G8B0	A0A1I3DW01	na	A0A1I3BWH5	na	na	na	A0A1I3E1S0
1114943	1	0	0	0	0	0	I2N3M3	na	na	na	na	na	na	na	na	na	na	na	A0A7G3ULD1	na	na
1114959	1	0	0	0	0	0	H0K9I0	na	na	na	na	na	na	na	na	na	H0JZ38	na	na	na	na
1114960	1	0	0	1	0	0	H0JLQ4	na	na	na	na	na	H0JS78	na	na	na	H0JU58	na	na	na	H0JS77
1114963	1	2	1	1	1	1	A0A0J7Y6Y5	na	na	A0A0J8B1I5	A0A0J8AL62	A0A0J8A629	A0A0J8AZE3	A0A0J7Y6I0	A0A0J7XUF7	na	A0A0J7XU99	na	na	na	A0A0J7XPD2
1114964	1	2	1	1	1	1	T0HGP8	na	na	T0HVF2	T0GN84	T0HV31	T0GWU3	T0HMZ5	T0G994	na	na	na	na	na	T0HHZ3
1114965	1	0	0	1	1	1	I1ZJU4	na	na	na	na	na	I1ZJC1	I1ZL00	I1ZNL0	na	na	na	I1ZLR9	I1ZLD0	na
1114970	2	3	1	1	1	1	G8Q4G7	G8Q855	G8Q554	G8Q7Z0	G8Q2R3	G8PYW2	G8QA84	G8QA83	G8Q3Y7	na	G8Q6E8	na	na	na	G8Q2R2
1114972	1	0	0	0	0	0	A0A0R1RTJ5	na	na	na	na	na	na	na	na	na	A0A0R1R8C1	na	A0A0R1RGX2	na	na
1115510	1	1	0	0	1	0	A0A8I2DRX8	na	A0A8I2DZ43	na	na	na	na	A0A8I2J4U6	na	na	A0A8I2DUB2	na	A0A8I2J6G1	na	na
1115512	1	3	1	1	1	1	H5UXG0	na	H5V0G3	H5V0G2	H5UYG0	H5V0E3	H5V4K6	H5V4K7	H5UZB0	na	na	na	H5V042	na	H5V3K0
1115515	1	3	1	1	1	1	A0A090UXZ9	na	A0A090VNB7	A0A090UXJ3	A0A090V5P8	A0A090UXK3	A0A090VTP3	A0A090V157	A0A090UWN4	na	na	na	A0A090UVZ0	na	A0A090V5K6
1115568	1	0	0	0	1	0	A0A1C6QIA8	na	na	na	na	na	na	A0A1C6P4V8	na	na	na	na	A0A1C6LQW2	na	na
1115570	1	0	0	0	0	0	A0A1A9D0W2	na	na	na	na	na	na	na	na	na	A0A1A9D8V1	na	A0A1A9CB62	na	na
1115757	1	1	1	1	1	1	A0A7T5JGD2	na	A0A7T5E4B9	na	na	A0A7T5JDB5	A0A7T5E184	A0A7T5E770	A0A7T5E381	na	A0A7T5E104	na	na	na	A0A7T5E5K2
1115758	1	0	0	1	1	1	A0A1V1I2F5	na	na	na	na	na	A0A1V1I3B3	A0A1V1I3C1	A0A1V1I3X0	na	A0A1V1I1D9	na	A0A1V1I140	A0A1V1I236	na
1115803	1	0	0	0	0	0	J3JKK9	na	na	na	na	na	na	na	na	na	na	na	na	na	na
1115809	1	1	1	1	1	1	U2QF85	na	na	na	U2QLA7	U2QB64	U2NR06	U2P7R3	U2P7Y9	na	na	na	na	na	U2P2W3
1115816	1	0	0	1	1	2	U2W447	na	na	na	na	na	U2VQK5	U2VY91	U2VNY7	U2UE07	na	na	U2T210	U2VQX0	na
1116116	1	3	1	0	1	1	A0A9P2SX94	na	A0A9P2SWG6	A0A9P2SZ79	A0A9P2T027	A0A9P2WJD6	na	A0A9P2T1F0	A0A9P2SS14	na	A0A9P2SZG0	na	na	na	A0A9P2STY3
1116133	1	3	1	0	1	2	A0A829CNB7	na	A0A829CN27	A0A829CE63	A0A829CZL1	A0A829CHX5	na	A0A829CZG6	A0A829CF84	A0A829CP32	A0A829CNC7	na	na	na	A0A829CDG4
1116229	1	0	0	1	0	0	S3CQE5	na	na	na	na	na	S3DH75	na	na	na	S3CI75	S3CH03	na	na	na
1116389	1	0	1	1	1	1	A0A1E5XV24	na	na	na	na	A0A1E5XSW3	A0A1E5XL32	A0A1E5XL56	A0A1E5XVK5	na	A0A1E5XIH5	na	na	na	A0A1E5XVV9
1116391	1	3	1	1	1	1	H6NSN3	na	H6NA12	H6NA13	H6NA14	H6NKN9	H6NQF2	H6NQF3	H6NSM9	na	H6NF20	na	H6NHE3	na	na
1116472	1	3	1	1	1	1	V5BZA4	na	V5BWJ0	V5DZE9	V5BH91	V5DYH6	V5C015	V5DVW7	V5C0J2	na	na	na	na	na	na
1117104	1	3	1	1	1	1	A0A9E3HCY0	na	A0A9E3HBX4	A0A9E3H6S1	A0A9E3H5Z4	A0A9E3HBQ8	A0A9E3LU54	A0A9E3HAC7	A0A9E3HFG0	na	A0A9E3LS80	na	na	na	na
1117108	1	3	1	1	1	1	S9U4I4	na	S9U6D4	S9SMX0	S9TUP2	S9SPL2	S9UCG5	S9U0X6	S9SHV7	na	S9SLX5	na	S9SU91	na	S9STR8
1117310	1	1	0	1	0	0	A0A9N9BIV9	na	A0A9N9A8L7	na	na	na	A0A9N8YL46	na	na	na	A0A9N8YXB0	A0A9N8ZC81	na	na	na
1117311	0	0	0	1	0	0	na	na	na	na	na	na	A0A9W4WP72	na	na	na	na	A0A9W4SFZ6	na	na	na
1117313	2	3	1	1	1	1	A0A290S7Z0	A0A290S817	A0A290S388	A0A290S1I5	A0A290S373	A0A290S224	A0A290S8Q2	A0A290S702	A0A290S383	na	na	na	na	na	na
1117314	2	3	1	1	1	1	U1KLU4	U1JK53	U1JPS6	U1KSL2	U1JTG0	U1JJ08	U1JBL2	U1JP54	U1KTV1	na	U1KHC4	na	na	na	na
1117316	2	3	1	1	1	1	U1JZ69	U1JQ34	U1JLR7	U1KVJ9	U1KYB6	U1KWM9	U1JPP2	U1K2G3	U1K4A2	na	na	na	na	na	na
1117318	2	3	1	1	1	1	U1KW37	U1KPG5	U1KAB1	U1KLH0	U1K7T4	U1LP60	U1KGX1	U1KUK9	U1KLJ1	na	na	na	na	na	na
1117319	1	3	1	1	1	1	A0A290T6W6	na	A0A290T540	A0A290T1Z3	A0A290T367	A0A290T4A0	A0A290T6P4	A0A290T5B4	A0A290T0F7	na	na	na	na	na	na
1117379	1	0	1	1	1	1	K6DMQ5	na	na	na	na	K6DEL1	K6DD14	K6D9D9	K6BU59	na	K6D049	na	K6CF56	K6DN48	K6C6K5
1117645	1	2	0	1	1	1	X5KLB1	na	X5KTY1	A0A1T3EPK1	na	na	X5KXZ0	X5K8E0	A0A085CEC3	na	na	na	na	na	na
1117647	1	3	1	1	1	1	K4KUB5	na	K4KEB8	K4KP46	K4KPI9	K4KG14	K4KJ22	K4KGR0	K4KMG4	na	K4KMR7	na	na	na	K4KF53
111769	2	3	1	1	1	1	A0A975FC23	A0A975F9E8	A0A975F9K2	A0A975F9H6	A0A975F9Z6	A0A975IIQ2	A0A975IJ11	A0A975FA99	A0A975F8U1	na	na	na	na	na	na
111770	2	3	1	1	1	1	A0A8B0SM02	A0A8B0SN08	A0A8B0SGV6	A0A8B0SFW5	A0A8B0SF41	A0A8B0SHD6	A0A8B0SVA5	A0A8B0SEJ5	A0A8B0SHU0	na	na	na	na	na	na
1117702	1	2	1	1	1	1	A0A117UTU9	na	na	A0A117USK6	A0A117UZD1	A0A117USV7	A0A117UVZ6	A0A117UVX2	A0A117UWH9	na	A0A117UV88	na	na	na	A0A117UUR6
1117707	1	3	1	1	1	1	A0A1M7Z327	na	A0A1M7Z2C8	A0A1M7Z2M7	A0A1M7Z248	A0A1M7YPE4	A0A1M7YZP1	A0A1M7YZX7	A0A1M7YR15	na	na	na	na	na	A0A1M7YPE7
1117708	1	2	0	1	1	1	A0A419X816	na	A0A419X5W6	A0A419X972	na	na	A0A419WWZ8	A0A419X671	A0A419WXD1	na	na	na	na	na	na
111780	1	3	1	1	1	1	K9XXJ2	na	K9Y0D5	K9XVJ7	K9XU30	K9XTG2	K9XW52	K9XXV9	K9XX60	na	K9XVL8	na	na	na	na
111781	1	3	1	1	1	1	K9PZR5	na	K9PWZ4	K9Q3W7	K9Q263	K9Q5T1	K9PZD3	K9Q0U4	K9PZ59	na	na	na	na	na	na
1117943	1	3	1	1	1	1	G9A4Z6	na	A0A0B7MT60	G9AFM6	G9AFM5	G9A8Y5	G9A6U7	G9A6U6	G9A678	na	G9A0R8	na	na	na	G9AAN0
1117987	1	3	1	1	1	1	A0A401I7C9	na	A0A401I3L9	A0A401I3W0	A0A401I3L3	A0A401I3Q3	A0A401HY44	A0A401HXX4	A0A401I7D4	na	A0A401HUB3	na	A0A401HZA7	na	A0A401I536
111806	1	0	0	0	1	0	A0A3D9SUB1	na	na	na	na	na	na	A0A3D9SNK0	na	na	na	na	na	na	na
1118153	2	3	1	1	1	1	H0IXM7	H0IXG2	H0IYQ3	H0IYQ2	H0IYQ1	H0IZU5	H0J576	H0J577	H0J3Y2	na	na	na	na	na	H0J0H1
1118156	0	2	0	1	0	2	na	na	na	M5CM80	M5CYY5	na	M5CLS1	na	M5D1M6	M5CIA9	M5CWI4	na	na	na	M5CHZ2
1118157	1	1	1	0	1	2	M5CT16	na	M5CUH9	na	na	M5D3F6	na	M5CYM5	M5D1A7	M5CTP8	M5CUV7	na	na	na	M5CT60
1118202	1	3	0	1	1	1	A0A1M6A8F1	na	A0A1M6G683	A0A1M6ASJ6	A0A1M6G662	na	A0A1M6AW59	A0A1M6EAX4	A0A1M6GH20	na	na	na	na	na	na
111831	1	3	1	1	0	1	A0A7H1N3M8	na	A0A7H1MZ26	A0A7H1N5Y7	A0A7H1N5V4	A0A7H1MY53	A0A7H1N6L7	na	A0A7H1N5W4	na	na	na	na	na	na
1118379	1	0	0	0	0	0	A0A7I7R3Q5	na	na	na	na	na	na	na	na	na	na	na	na	na	na
111844	1	1	1	1	1	1	A0A7D5I1Q4	na	na	na	A0A7D5I2K0	A0A7D5DWU4	A0A7D5HUB9	A0A7D5DYT1	na	A0A7D5DW35	A0A7D5DWC1	na	na	na	A0A7H8UM10
1118451	1	1	1	1	1	1	A0A512HCP2	na	A0A7Z7LMA0	na	na	A0A512HEV8	A0A512HD17	A0A512HD11	A0A512HE29	na	A0A512HDU0	na	na	na	A0A512HLI3
1118519	1	1	0	0	0	0	A0A7K5A9H9	na	A0A7K4ZW74	na	na	na	na	na	na	na	na	A0A7K4ZLU1	na	na	na
1118524	1	1	0	0	0	0	A0A7K8UY40	na	A0A7K8VJR1	na	na	na	na	na	na	na	na	A0A7K8VH61	na	na	na
1118560	1	1	0	0	0	0	A0A7L0MZS6	na	A0A7L0N1F0	na	na	na	na	na	na	na	na	A0A7L0NSC0	na	na	na
1118748	1	1	0	0	0	0	A0A7L0P5W7	na	A0A7L0PIW3	na	na	na	na	na	na	na	na	A0A7L0PAF9	na	na	na
1118817	1	1	0	0	0	0	A0A851PC51	na	A0A851NE23	na	na	na	na	na	na	na	na	na	na	na	na
1119533	1	3	1	1	1	1	A0A0T6VZC9	na	A0A0T6W2S4	A0A0T6VZS4	A0A0T6VZL6	A0A0T6W3Z8	A0A0T6W5V1	A0A0T6W5A7	A0A0T6W1C7	na	na	na	na	na	na
1119534	1	0	0	0	0	0	A0A7Y9RP97	na	na	na	na	na	na	na	na	na	na	na	A0A7Y9UV70	na	na
111955	1	3	0	0	0	0	A0A832TJ95	na	A0A832TR12	A0A832WE48	A0A832TBZ5	na	na	na	na	na	na	na	na	na	na
112002	1	3	1	1	1	1	A0A1G6Z586	na	A0A1G6XUS4	A0A1G6VMY8	A0A1G6UUD0	A0A1G6X4K4	A0A1G6VW83	A0A1G6ZP45	A0A1G6X826	na	na	na	na	na	na
1120045	1	3	1	1	1	1	A0A370KS79	na	A0A370KL33	A0A370KLD3	A0A370KL34	A0A370KPY6	A0A370KS22	A0A370KS21	A0A370KVP1	na	A0A370KLR1	na	na	na	A0A370KLU3
1120658	1	3	1	1	1	1	A0A4U6C0P6	na	A0A4U6C3B8	A0A4U6BZV7	A0A4U6BZC0	A0A4U6BZ93	A0A4U6C731	A0A4U6CB31	A0A4U6BIH0	na	A0A4U6BZ45	na	na	na	A0A4U6BWX1
1120679	1	3	1	1	1	1	A0A1S2F6A1	na	A0A1S2EX07	A0A1S2EX08	A0A1S2EYG4	A0A1S2EWQ1	A0A1S2EYF9	A0A1S2EZW8	A0A1S2F4T6	na	A0A1S2F968	na	na	na	na
1120688	1	3	1	1	1	1	A0A0M3BQ04	na	A0A0M3BJE3	A0A0M3BG32	A0A0M3BFZ2	A0A0M3AZD9	A0A0M3BT47	A0A0M3BQ64	A0A0M3BIM2	na	A0A0M3B1U1	na	na	na	A0A0M3B8J9
1120689	1	3	0	1	1	1	A0A4U6A1U7	na	A0A4U5ZUF0	A0A4U5ZK35	A0A4U5ZK48	na	A0A4V6BBB3	A0A4U6ATY6	A0A4U6ATN3	na	A0A4U5ZVY1	na	na	na	A0A4U6ALK8
1120705	1	2	1	1	1	1	A0A095BUU3	na	na	A0A095DHN9	A0A095BAS9	A0A095BS44	A0A095B4B5	A0A095B2H7	A0A095D153	na	na	na	na	na	A0A095B498
1120755	0	1	0	0	0	0	na	na	K6UUX0	na	na	na	na	na	na	na	na	na	na	na	na
112090	1	1	0	1	1	1	A0A397DFB5	na	A0A397BDU9	na	na	na	A0A396ZWH4	A0A397CTZ6	na	A0A397C5M0	na	A0A397AU41	na	na	na
1120918	1	3	1	1	1	1	A0A1I0XSQ1	na	A0A1I0YW75	A0A1I0YX15	A0A1I0YUQ9	A0A1I0YWV8	A0A1I0VMQ4	A0A1I0V3S4	na	A0A1I0V030	na	na	A0A1I0UXJ0	na	na
1120919	1	3	1	1	1	1	A0A511XAY9	na	A0A511X7M6	A0A511X7N3	A0A511X7N0	A0A511XCE5	A0A511X749	A0A511X738	A0A511X755	na	A0A511X7N4	na	na	na	na
1120920	1	3	1	1	1	1	A0A1G5RWJ5	na	A0A1G5RZM0	A0A1G5RZ86	A0A1G5RZA9	A0A1G5RZL5	A0A1G5RY20	A0A1G5RX76	A0A1G5S517	na	A0A1G5RTT5	na	A0A1G5RQV7	A0A1G5RXN4	na
1120923	1	3	1	1	1	1	A0A0D6PL28	na	A0A0D6PF98	A0A0D6PGC1	A0A0D6PHW6	A0A0D6PMI1	A0A0D6PLC4	A0A0D6PK06	A0A0D6PJS8	na	na	na	na	na	na
1120925	1	3	1	1	1	2	N9C9L9	na	N9DKG9	N9DL79	N9DSJ9	N9DPM5	N9C761	N9C857	N9C9X9	N9DJF4	na	na	na	na	na
1120926	1	3	1	1	1	2	N8YCL5	na	N8ZRR9	N8ZPL1	N8ZI67	N8ZL59	N8Y642	N8ZKW2	N8ZMY6	N8ZM08	na	na	na	na	na
1120927	1	3	1	1	1	1	R9AXR2	na	R9AUH9	R9B3F3	R9AXI6	R9AW68	R9B554	R9BAI7	R9B0Z5	na	na	na	na	na	na
1120928	1	3	1	1	1	1	V2W2G2	na	V2V534	V2V6S3	V2V6M6	V2UVV4	V2V358	V2V729	V2UZA2	na	na	na	na	na	na
1120929	1	3	1	1	1	1	N9BAL1	na	N9CCU1	N9CQ73	N9BBD1	N9CPP1	N9B6H1	N9CLT0	N9B5C8	na	na	na	na	na	na
1120940	1	1	0	0	1	0	A0A495QG84	na	A0A495QAY3	na	na	na	na	A0A495QY82	na	na	A0A495QRU7	na	na	na	na
1120955	1	0	0	1	1	1	A0A1G5NVE6	na	na	na	na	na	A0A1G5NI93	A0A1G5NGD0	A0A1G5NZT8	na	na	na	A0A1G5P6F9	na	A0A1G5NX50
1120964	1	2	0	1	1	1	A0A1H5WMD3	na	A0A1H5WMC3	A0A1H5Z6E3	na	na	A0A1H5UPR7	A0A1H5RS56	A0A1H5V7Y3	na	na	na	na	na	A0A1H5VP80
1120975	1	0	0	1	1	1	A0A1M4TQE8	na	na	na	na	na	A0A1M4S4S5	A0A1M4S484	A0A1M4V2S0	na	na	na	A0A1M4VCZ7	A0A1M4YCA7	na
1120976	1	3	0	1	1	1	A0A1G5KKL1	na	A0A1G5KLH0	A0A1G5KLG3	A0A1G5KKJ5	na	A0A1G5L3A7	A0A1G5L3B8	A0A1G5K2P8	na	na	na	A0A1G5AR60	A0A1G5L7F5	na
1120981	1	3	1	1	1	1	na	A0A286EC91	A0A286ED78	A0A286ED90	A0A286E6Q4	A0A286E6P8	A0A286EG96	A0A286E6U3	na	A0A286EFQ5	na	na	na	na	A0A286E6N0
1120987	0	1	0	1	1	1	na	na	A0A1H3GWF9	na	na	na	A0A1H3DDL8	A0A1H3DSC2	na	A0A1H3DAR6	na	na	na	na	A0A1H3FMM0
1120989	0	0	0	1	1	1	na	na	na	na	na	na	A0A1M6LPA6	A0A1M6LP83	A0A1M6P6N2	na	A0A1M6Q8V0	na	A0A1M6MPK8	A0A1M6RWK7	na
1120990	0	0	0	1	1	1	na	na	na	na	na	na	A0A1I0BJN1	A0A1I0BIN8	A0A1I0AB01	na	A0A1I0CM49	na	A0A1H9ZZ47	A0A1I0AUB8	na
1120995	0	0	0	1	1	1	na	na	na	na	na	na	A0A1M5RFG9	A0A1M5RFX6	na	A0A1M5QLH1	na	na	A0A1M5Q788	na	na
1120996	0	1	0	1	1	1	na	na	A0A1M7KZ83	na	na	na	A0A1M7KQT5	A0A1M7EMY3	A0A1M7IJ05	na	A0A1M7II07	na	A0A1M7J0A5	A0A1M7HWF6	na
1120997	2	3	1	1	1	1	A0A1M6GJH9	A0A1M6DHT4	A0A1M6E6G9	A0A1M6E6T8	A0A1M6DI35	A0A1M6BHW7	A0A1M6EMS7	A0A1M6GJJ1	na	A0A1M6GJM7	na	na	A0A1M6BY80	na	na
1121001	1	3	1	1	1	1	A0A1W1X5L3	na	A0A1W1X1R5	A0A1W1X9W6	A0A1W1XAM6	A0A1W1XPQ8	A0A1W1XK67	A0A1W1XLA8	A0A1W1XKS4	na	na	na	na	na	na
1121003	1	0	0	1	1	1	A0A1I3L588	na	na	na	na	na	A0A1I3PET9	A0A1I3PFK9	A0A1I3NT26	na	A0A1I3HF96	na	na	na	A0A1I3Q928
1121013	2	3	1	1	1	1	A0A091BGB0	A0A091BH26	A0A091BWT7	A0A091BK91	A0A091BEU5	A0A091C1P4	A0A091B988	A0A091BCG4	A0A091BC06	na	na	na	na	na	A0A091BZ67
1121014	2	3	1	1	1	1	A0A087MGY6	A0A087ML82	A0A087MK61	A0A087MG50	A0A087MG37	A0A087MGK0	A0A087MJX0	A0A087MJX1	A0A087MKK1	na	na	na	na	na	na
1121015	2	3	1	1	1	1	A0A091AU73	A0A091AW92	A0A091ATT6	A0A091AUJ1	A0A091BFD2	A0A091BHX1	A0A091B042	A0A091AXB2	A0A091B9N0	na	na	na	na	na	A0A091AQK8
1121021	1	3	1	1	1	1	A0A3N0AZP1	na	A0A3N0ATH4	A0A3N0AV20	A0A3N0ATM7	A0A3N0ATP0	A0A3N0AVV9	A0A3N0AWM5	na	A0A3N0AN60	A0A3N0AT54	na	A0A3N0AVX9	na	na
1121022	1	3	1	1	1	1	V4NUP1	na	V4PQR8	V4PN57	V4PFJ2	V4Q7F1	V4PYQ5	V4PQZ0	V4RRF9	na	na	na	na	na	V4Q8L6
1121025	0	0	0	1	1	1	na	na	na	na	na	na	A0A1M4XAM7	A0A1M4XAP1	A0A1M4Y2D3	na	A0A1M4WCC4	na	A0A1M4TBW1	A0A1M4YGK9	na
1121026	1	3	1	1	1	1	A0A1M6CMA5	na	A0A1M6GVH0	A0A1M6K2L2	A0A1M6K2T2	A0A1M6DN31	A0A1M6J9Y8	A0A1M6JA68	A0A1M6N890	na	na	na	na	na	A0A1M6FRJ9
1121029	2	3	1	1	1	1	A0A323UNZ4	A0A323UPG0	A0A323UPJ1	A0A323V2X1	A0A323V1I0	A0A323UR76	A0A323V0S9	A0A323V2I1	A0A323UTL8	na	na	na	na	na	na
1121088	1	1	1	1	1	1	A0A8B4BTN5	na	na	na	A0A8B4BYT7	A0A8B4C0Q3	A0A8B4BUM8	A0A8B4BTA5	A0A8B4BS43	na	na	na	A0A8B4BT39	A0A8B4BPV2	A0A8B4BXI1
1121097	1	1	1	0	1	1	A0A069D3H9	na	na	na	A0A069D032	A0A069D1C4	na	A0A069D1L3	A0A069D6V2	na	na	na	na	na	A0A069D7S5
1121098	1	3	1	1	1	1	U6RBW3	na	U6RNW4	U6RP86	U6RNH5	U6RQH8	U6RL58	U6R9K4	na	U6RFM9	na	na	na	na	U6RN53
1121100	1	1	1	0	1	1	W4PIF7	na	na	na	W4PGJ2	W4PEZ6	na	W4PH31	na	W4PJE3	na	na	na	na	W4PFU8
1121117	1	1	1	1	1	1	A0A1H8K7E7	na	na	na	A0A1H8EPN3	A0A1H8ERH3	A0A1H8KDI6	A0A1H8KEI3	A0A1H8DW50	na	na	na	na	na	A0A1H8DID4
1121120	1	3	1	1	1	2	A0A2U1UUQ2	na	A0A2U1UIN3	A0A2U1UVE6	A0A2U1UW74	A0A2U1UW53	A0A2U1UW18	A0A2U1UW56	A0A2U1UFE8	A0A2U1UK85	A0A2U1ULT0	na	A0A2U1USF5	na	A0A2U1UQG4
1121131	1	0	0	1	1	1	A0A1M5Z348	na	na	na	na	na	A0A1M5PMR6	A0A1M5ZJU5	na	A0A1M5ZMR0	A0A1M5YFX1	na	A0A1M5X4Q0	A0A1M5YVX4	A0A1M6FRA0
1121132	0	0	0	1	1	1	na	na	na	na	na	na	A0A1M7T5Y7	A0A1M7SAK6	na	A0A1M7S9W3	A0A1M7SFB7	na	A0A1M7RXP9	A0A1M7S3F8	na
1121255	1	1	1	1	1	1	A0A844B4P0	na	na	na	A0A844B168	A0A844B366	A0A844BB06	A0A844B5B0	A0A844BEU1	na	na	na	na	na	na
1121256	1	3	1	1	1	1	A0A1M5A9A2	na	A0A1M4ZPA4	A0A1M4ZPE4	A0A1M4ZNZ0	A0A1M5ATM2	A0A1M4TXN1	A0A1M4TXI0	A0A1M4YQJ1	na	A0A1M4ZE02	na	A0A1M4VXN3	na	na
1121262	1	3	0	1	1	1	na	A0A1M5AFT1	A0A1M4TRE4	A0A1M4TRM5	A0A1M4TRA0	na	A0A1M4WSZ0	A0A1M4WTQ2	A0A1M4W9S1	na	A0A1M5A091	na	A0A1M4U6A0	A0A1M4VEE2	na
1121264	1	3	0	1	1	1	A0A1M5W7J6	na	A0A1M5RU39	A0A1M5RTW1	A0A1M5RTY3	na	A0A1M5TRB0	A0A1M5TRG3	A0A1M5UAG4	na	na	na	A0A1M5R8S8	A0A1M5RV49	na
1121266	1	3	0	1	1	1	A0A1M6P1J8	na	A0A1M6R913	A0A1M6R8I8	A0A1M6R8D3	na	A0A1M6M1L7	A0A1M6M242	A0A1M6MUW2	na	na	na	A0A1M6NJ51	A0A1M6NNF9	na
1121267	1	3	1	1	1	1	A0A1W6BUJ1	na	A0A1W6BUZ4	A0A1W6BUW0	A0A1W6BYK3	A0A1W6BUC1	A0A1W6BWU0	A0A1W6BWJ4	na	A0A1W6BYW6	na	na	na	na	na
1121270	1	3	0	1	1	1	A0A1T4LPG8	na	A0A1T4LNP2	A0A1T4LNU8	A0A1T4MRT9	na	A0A1T4PHW4	A0A1T4PHN2	A0A1T4L9E1	na	na	na	na	na	na
1121279	1	3	1	1	1	1	A0A1K2HB27	na	A0A1K2HGX2	A0A1K2H4Q8	A0A1K2H5W5	A0A1K2H9I5	A0A1K2HFV7	A0A1K2HH92	A0A1K2HCW3	na	na	na	na	na	na
1121284	1	2	0	1	1	1	A0A1U7PXH5	na	A0A1U7PSS7	A0A1U7PV21	na	na	A0A1U7PPG2	A0A1U7Q0E2	A0A1U7PXP6	na	na	na	na	na	na
1121290	1	3	0	1	1	1	A0A1E8EYJ1	na	A0A1E8EYF7	A0A1E8EZ74	A0A1E8EYG7	na	A0A1E8EXM2	A0A1E8EWX1	na	A0A1E8F0X8	na	na	A0A1E8EXK6	A0A1E8F0Q4	na
1121291	1	3	0	1	1	1	na	A0A1W1XQH5	A0A1W1XK78	A0A1W1XKC8	A0A1W1XQG3	na	A0A1W1XBF9	A0A1W1XB88	A0A1W1XDF2	na	na	na	A0A1W1XBI7	A0A1W1X9V7	na
1121295	1	0	0	1	1	1	A0A2S6FYN2	na	na	na	na	na	A0A2S6G104	A0A2S6G1A1	A0A2S6G028	na	A0A2S6FXP6	na	A0A2S6FWC6	A0A2S6FX93	na
1121298	0	1	0	1	1	1	na	na	na	na	A0A1M6KDC3	na	A0A1M6CVE8	A0A1M6CVM1	A0A1M6JE87	na	na	na	A0A1M6BBL3	A0A1M6B111	na
1121301	1	3	0	1	1	1	A0A1M6NPU2	na	A0A1M6QZ91	A0A1M6QZX7	A0A1M6QZB3	na	A0A1M6QV25	A0A1M6QUE5	A0A1M6MMD4	na	na	na	A0A1M6KJV9	A0A1M6KR21	na
1121302	1	1	0	1	1	1	A0A1M6EVP9	na	A0A1M6JAT6	na	na	na	A0A1M6ABI3	A0A1M6ABL8	A0A1M6MQP5	na	A0A1M6BBN9	na	A0A1M6CHX3	A0A1M6D2L3	na
1121305	1	3	1	1	1	1	A0A151AQV4	na	A0A151AQW0	A0A151AR20	A0A151AQW1	A0A151ARJ9	A0A151ARA5	A0A151AR44	A0A151AN72	na	na	na	A0A151ALV4	A0A151AL78	na
1121306	1	0	0	1	1	1	A0A1M5TXG4	na	na	na	na	na	A0A1M5YD15	A0A1M5YD23	A0A1M5VZP0	na	A0A1M5WPT3	na	A0A1M5VEI0	A0A1M5TF84	na
1121307	1	3	1	1	1	1	na	A0A0J8D980	A0A0J8D3Z1	A0A0J8D839	A0A0J8DCQ2	A0A0J8DCP2	A0A0J8DAD3	A0A0J8G0E7	A0A0J8D966	na	A0A0J8FZR5	na	A0A0J8D4K7	A0A0J8DEK8	na
1121308	1	0	0	1	1	1	A0A125V509	na	na	na	na	na	A0A125V919	A0A125V907	A0A125V2T8	na	A0A125V5F5	na	A0A125V1E2	A0A125V6T5	na
1121310	1	3	0	1	1	2	A0A1S8L3Z7	na	A0A1S8L4G2	A0A1S8L3U1	A0A1S8L3R0	na	A0A1S8LKX8	A0A1S8LKK8	A0A1S8LCG3	A0A1S8LDR0	na	na	A0A1S8LG54	A0A1S8LK55	na
1121316	1	0	0	1	1	1	A0A1M5X204	na	na	na	na	na	A0A1M5SJV5	A0A1M5SK65	A0A1M5RRV0	na	A0A1M5U9Z1	na	A0A1M5TIL8	A0A1M5RTE2	na
1121318	1	3	0	1	1	1	A0A0L6Z6T8	na	A0A0L6Z770	A0A0L6Z6T3	A0A0L6Z6T5	na	A0A0L6ZDM9	A0A0L6ZDR5	A0A0L6ZCQ5	na	na	na	A0A0L6Z6A1	A0A0L6Z5W5	na
1121320	1	0	0	1	1	1	A0A1M5WSX9	na	na	na	na	na	A0A1M5Z2N3	A0A1M5Z2T9	A0A1M5YWW7	na	A0A1M5XFD5	na	A0A1M5WZD1	A0A1M5XY53	na
1121321	1	3	1	1	1	1	A0A1M5N8D6	na	A0A1M5QLD1	A0A1M5QME9	A0A1M5QLJ0	A0A1M5QM02	A0A1M5J886	A0A1M5JA11	A0A1M5JHF6	na	na	na	A0A1M5J725	A0A1M5KNR5	na
1121322	1	0	0	1	1	2	A0A1M7D7E7	na	na	na	na	na	A0A1M6R862	A0A1M6WL93	A0A1M6PWN7	A0A1M6UI72	A0A1M6QMP0	na	A0A1M6JT44	A0A1M6S4L3	na
1121323	0	0	0	1	1	1	na	na	na	na	na	na	A0A1M6TWK9	A0A1M6VJI0	na	A0A1M6TBG6	A0A1M6TX99	na	A0A1M6KA47	A0A1M6LY32	na
1121324	1	3	0	1	1	1	A0A069RJI7	na	A0A069RAQ0	A0A069RI14	A0A069REV9	na	A0A069RH28	A0A069RPI9	na	A0A069RHY2	A0A069RIH4	na	A0A069RC53	A0A069RHR9	na
1121325	1	0	0	1	1	1	A0A1G9L409	na	na	na	na	na	A0A1G9RA49	A0A1G9R9P7	A0A1G9R1W5	na	A0A1G9MAY1	na	A0A1G9IHH4	A0A1G9M994	na
1121326	1	3	1	1	1	1	A0A162REP1	na	A0A162T3F9	A0A161YNA9	A0A162T3C3	A0A161WVM2	A0A162UCT0	A0A162UCQ2	A0A161YKC3	na	na	na	A0A162RM70	na	na
1121328	1	0	0	1	1	1	A0A150FQ87	na	na	na	na	na	A0A150FP78	A0A150FP63	A0A150FQI1	na	A0A150FQT5	na	A0A150FMP2	A0A150FQ56	na
1121331	1	1	1	1	1	1	A0A1M6N6S5	na	na	na	A0A1M6NZC3	A0A1M6N5L0	A0A1M6P8P2	A0A1M6P8U8	A0A1M6RNG5	na	na	na	A0A1M6JNR0	A0A1M6N5N6	na
1121335	1	0	0	1	1	1	L7VM81	na	na	na	na	na	L7VPC4	L7VRV4	na	L7VPF8	L7VUM7	na	L7VN43	L7VRQ5	na
1121336	1	0	0	1	1	1	A0A1B1YBL3	na	na	na	na	na	A0A1B1YD15	A0A1B1YGW6	na	A0A1B1YD35	A0A1B1YFL6	na	A0A1B1YAL7	A0A1B1YCW9	na
1121337	1	3	0	1	1	1	A0A318Y556	na	A0A318XJK5	A0A318XIR7	A0A318XRW9	na	A0A318XIK1	A0A318XJ22	na	A0A318XRT6	na	na	A0A318XID2	A0A318XM11	na
1121338	1	3	0	1	1	1	A0A151B3B6	na	A0A151B3D3	A0A151B428	A0A151B397	na	A0A151B807	A0A151B8B0	na	A0A151B5M8	na	na	A0A151AYE5	A0A151B708	na
1121339	1	3	1	1	1	1	A0A1V4SXU0	na	A0A1V4SXR6	A0A1V4SXZ4	A0A1V4SZ04	A0A1V4SYY1	A0A1V4SX53	A0A1V4SXX0	A0A1V4SWN7	na	na	na	A0A1V4SWN4	A0A1V4SWQ4	na
1121340	1	3	1	1	1	1	A0A2T0AQU1	na	A0A2T0AQJ2	A0A2T0AQG4	A0A2T0AQI7	A0A2T0AQH0	A0A2T0AX83	A0A2T0AX75	A0A2T0AVE9	na	na	na	A0A2T0APC0	A0A2T0ARW3	na
1121345	0	1	0	1	1	1	na	na	A0A1M7YCA9	na	na	na	A0A1M7YDJ7	A0A1M7Y0F8	na	A0A1M7Y4K9	na	na	A0A1M7Y0Z8	A0A1M7YJZ6	na
1121353	1	0	0	1	0	0	M1V0A5	na	na	na	na	na	M1TMU0	na	na	na	M1TQU4	na	M1USA5	na	M1URK8
1121357	1	0	0	1	0	0	A0A1H9V6X9	na	na	na	na	na	A0A1H9U781	na	na	na	A0A1H9P4Z0	na	na	na	A0A1H9U7C9
1121362	1	0	0	1	0	0	M1N0G0	na	na	na	na	na	M1P3P2	na	na	na	M1NYY1	na	na	na	M1NIP4
1121388	2	3	1	1	1	1	A0A8B6X4X9	A0A8B6X2N3	A0A8B6X6H5	A0A8B6X5N4	A0A8B6X857	A0A8B6X5U7	A0A8B6X7C3	A0A8B6XBS8	A0A8B6XBZ8	na	A0A8B6XD47	na	na	na	na
1121389	1	3	1	1	1	1	A0A2T4Z9X8	na	A0A2T4Z6T9	A0A2T4Z6W2	A0A2T4Z6V5	A0A2T4ZBX6	A0A2T4Z8Y0	A0A2T4Z8U9	A0A2T4Z7S5	na	na	na	A0A2T4ZCL2	A0A2T4ZCX5	na
1121390	1	2	1	1	1	2	na	A0A1W1XGE3	A0A1W1XMX6	na	A0A1W1XKC3	A0A1W1XH83	A0A1W1XA70	A0A1W1X9C5	A0A1W1XPP6	A0A1W1X210	na	A0A1W1XBK2	na	na	A0A1W1XAA5
1121391	1	1	1	1	1	2	na	A0A1M4TL47	A0A1M5C6R9	na	na	A0A1M4Z1D4	A0A1M4VEX0	A0A1M4VF11	A0A1M4VMP9	A0A1M4SGP1	na	A0A1M5C305	na	na	A0A1M4VJV1
1121393	1	3	1	1	1	2	na	A0A1M7AL40	A0A1M6MMJ5	A0A1M6MMN2	A0A1M6MMM0	A0A1M6WR12	A0A1M6PEI2	A0A1M6HVJ8	A0A1M6PNR7	A0A1M6T307	na	na	na	na	na
1121395	1	1	0	1	1	1	A0A1M7UHT4	na	na	na	A0A1M7UQB8	na	A0A1M7U7K9	A0A1M7U7N9	A0A1M7U057	na	na	na	A0A1M7TQY1	na	A0A1M7UQI9
112140	1	3	1	1	1	1	A0A7W4P6K9	na	A0A7W4J7H9	A0A7W4P6G2	A0A7W4J713	A0A7W4P659	A0A7W4J8Q8	A0A7W4J8I6	A0A7W4J8H9	na	A0A7W4J9I0	na	na	na	na
1121400	1	3	1	1	1	1	na	A0A1W1ZDE7	A0A1W1ZTI4	A0A1W2A6W6	A0A1W2A6T3	A0A1W2A6X4	A0A1W2C469	A0A1W2C374	na	A0A1W1ZRK6	na	na	na	na	A0A1W2DQX1
1121405	1	3	1	1	1	1	na	S7TWA1	S7UP63	S7TAG8	S7TBW7	S7TGJ0	S7U6C4	S7VD70	na	S7U1N8	na	na	na	na	S7TXF9
1121409	1	3	0	1	1	0	na	A0A1M5Y478	A0A1M5U978	A0A1M5U8D4	A0A1M5SDM7	na	A0A1M5WEU4	A0A1M5VB44	na	na	na	na	na	na	na
1121416	0	1	1	1	1	1	na	na	A0A1M7YKM4	na	na	A0A1M7Y8R5	A0A1M7Y7C8	A0A1M7XZF1	na	A0A1M7XW89	na	na	na	na	A0A1M7Y328
1121419	1	3	0	1	1	1	A0A1G7XKE1	na	A0A1G7XL28	A0A1G7XKG7	A0A1G7W4X0	na	A0A1G8GI27	A0A1G8GHU6	A0A1G8JD27	na	na	na	A0A1G7T5M5	na	A0A1G8L2J3
1121420	1	3	0	1	1	1	A0A1M5V3S0	na	A0A1M5WJF7	A0A1M5WKF2	A0A1M5WJ99	na	A0A1M5Z2E2	A0A1M5Z218	A0A1M5XLU7	na	na	na	A0A1M5YQ03	A0A1M5QWQ0	na
1121421	1	3	0	1	1	1	A0A1M6NEU7	na	A0A1M6NEX7	A0A1M6NEX9	A0A1M6NES4	na	A0A1M6NM87	A0A1M6NMQ5	na	A0A1M6NMH4	na	na	na	na	na
1121424	1	3	0	1	1	1	A0A1I2S627	na	A0A1I2QHM6	A0A1I2QIG1	A0A1I2QJK3	na	A0A1I2SED9	A0A1I2SJV8	na	A0A1I2SEU1	na	na	A0A1I2QA00	na	na
1121425	1	3	0	1	1	1	A0A1M5C704	na	A0A1M5C708	A0A1M5C6W8	A0A1M5C6Y0	na	A0A1M5AWH2	A0A1M5AWA3	na	A0A1M5AW46	na	na	na	na	na
1121426	1	3	0	1	1	1	A0A1I6DLZ9	na	A0A1I6D4V2	A0A1I6D587	A0A1I6D4Y0	na	A0A1I6EBV2	A0A1I6EBJ8	na	A0A1I6EBP8	na	na	A0A1I6D6V2	na	A0A1I6DV86
1121428	1	3	0	1	1	1	K8DX41	na	K8EEA0	K8E6L1	K8DXB3	na	K8DXH1	K8EEM4	na	K8E6X4	na	na	na	na	na
1121429	1	3	0	1	1	1	A0A1M4T0W5	na	A0A1M4T0S6	A0A1M4T0V2	A0A1M4T169	na	A0A1M4SQ88	A0A1M4SQB8	na	A0A1M4SQ43	A0A1M5CH01	na	na	na	na
1121431	1	0	0	1	1	1	A0A5S5A055	na	na	na	na	na	A0A5S4ZYX4	A0A5S5A0C4	na	A0A5S4ZY06	na	na	na	na	A0A5S4ZMY4
1121432	1	3	0	1	1	1	A0A1M6DG92	na	A0A1M6DGK5	A0A1M6DGC1	A0A1M6DGX9	na	A0A1M6H7G1	A0A1M6H7H7	na	A0A1M6H779	na	na	na	na	na
1121439	1	1	0	1	1	1	na	S7UM30	S7TG79	na	na	na	S7UTX5	S7UQ99	na	S7TD28	na	na	na	na	S7TE89
1121442	1	1	0	1	1	1	na	A0A1T4W6K3	A0A1T4VY84	na	na	na	A0A1T4VKC1	A0A1T4X3A7	na	A0A1T4VIA6	na	A0A1T4W2K4	na	na	A0A1T4W1K1
1121448	1	1	0	1	1	1	na	T2GBW1	T2G7C5	na	na	na	T2GBA9	T2G9G3	na	T2GFD7	na	na	na	na	T2G997
1121449	1	2	0	1	1	1	na	A0A1T4WDQ8	A0A1T4Y2G6	na	A0A1T4W2G9	na	A0A1T4WJQ0	A0A1T4XNC1	na	A0A1T4X8A7	na	na	na	na	A0A1T4X8J7
1121451	1	1	1	1	1	1	na	L0RE68	L0R8Z0	na	na	L0RB75	L0RDQ3	L0RBU5	na	L0R801	na	na	na	na	L0R8Q1
1121455	1	1	1	1	1	1	na	A0A1M7TGB9	A0A1M7TAA6	na	na	A0A1M7TIP3	A0A1M7SCA5	A0A1M7TD12	na	A0A1M7TMP4	na	na	na	na	A0A1M7TIJ7
1121457	1	3	1	1	1	1	na	A0A1N6H6E3	A0A1N6DN51	A0A1N6I871	A0A1N6I872	A0A1N6E7Q1	A0A1N6FWB2	A0A1N6EVB7	na	A0A1N6J2L4	A0A1N6HCR8	na	na	na	A0A1N6E7N8
1121476	1	3	0	1	1	1	A0A1M6AS32	na	A0A1M6AS51	A0A1M6ARU2	A0A1M6AS06	na	A0A1M6D3F1	A0A1M6D3B2	A0A1M6ELB7	na	A0A1M6KBY3	na	A0A1M6D185	A0A1M6L7I8	na
1121477	1	0	0	1	1	1	A0A0F5LP45	na	na	na	na	na	A0A0F5LL37	A0A0F5LKR3	A0A0F5L449	na	A0A0F5LAE8	na	na	na	A0A0F5LPL8
1121864	0	0	0	1	1	1	na	na	na	na	na	na	S1RLN3	S1RHE9	na	S1QVE9	S1RS34	na	S1R220	S1QUS0	na
1121865	0	0	0	1	1	1	na	na	na	na	na	na	S0KDB3	S0K7J3	na	S0L0A0	S0KPG5	na	S0KBC4	S0KRH1	na
1121868	1	3	1	1	1	1	A0A1T4VKR0	na	A0A1T4VBV7	A0A1T4VD01	A0A1T4UMD3	A0A1T4UBX6	A0A1T4URH7	A0A1T4US91	A0A1T4UT23	na	na	na	na	na	A0A1T4U9K6
1121869	1	3	1	1	1	1	A0A1I5JZ08	na	A0A1I5JZ19	A0A1I5JZ65	A0A1I5NNB3	A0A1I5W0P8	A0A1I5V9T4	A0A1I5V8A3	A0A1I5SIK2	na	A0A1I5WWI2	na	na	na	A0A1I5RX31
1121877	1	3	1	1	1	1	A0A0D8FV45	na	A0A0D8FT82	A0A0D8FW57	A0A0D8FWP0	A0A0D8FRC6	A0A0D8FYV2	A0A0D8FXP3	A0A0D8FXH0	na	na	na	na	na	na
1121881	1	1	1	1	1	1	A0A1M4TI37	na	na	na	A0A1M4UL65	A0A1M4SEW6	A0A1M4SHX5	A0A1M4SIH2	A0A1M4UN46	na	na	na	na	na	A0A1M4SEV7
1121883	1	1	0	1	1	1	na	A0A1M7S7M8	A0A1M7RVM9	na	na	na	A0A1M7T8Z5	A0A1M7S075	na	A0A1M7TDE0	na	na	A0A1M7RQV9	na	A0A1M7SWV6
1121884	1	2	0	1	1	1	A0A1M5FD01	na	A0A1M5BY54	A0A1M5D5S9	na	na	A0A1M5CW77	A0A1M4ULR4	A0A1M5FXX6	na	na	na	na	na	A0A1M4Z300
1121886	1	2	0	1	1	1	A0A2S4NAS4	na	A0A2S4N912	A0A2S4N553	na	na	A0A2S4N7U8	A0A2S4NA46	A0A2S4N5S7	na	na	na	na	na	A0A2S4N6E0
1121895	1	2	0	1	1	1	A0A0A2M010	na	A0A0A2LZ27	A0A0A2M192	na	na	A0A0A2M8N1	A0A0A2M668	A0A0A2M5T4	na	na	na	na	na	A0A0A2MCL7
1121898	1	2	0	1	1	1	A0A0A2MWK2	na	A0A0A2MIM9	A0A0A2MUZ3	na	na	A0A0A2MI79	A0A0A2MNI1	A0A0A2N0T5	na	A0A0A2MJ11	na	na	na	A0A0A2MIW4
1121899	1	2	0	1	1	1	A0A0A2MEM4	na	A0A0A2MAZ3	A0A0A2M6J7	na	na	A0A0A2MB14	A0A0A2MA21	A0A0A2MNF8	na	na	na	na	na	A0A0A2MEC9
1121911	1	0	0	1	1	1	A0A1T4MIS5	na	na	na	na	na	A0A1T4K1W1	A0A1T4K1Q3	A0A1T4PJA5	na	A0A1T4MDT5	na	A0A1T4KZB7	A0A1T4KYQ2	na
1121915	1	3	0	1	1	1	na	A0A0C2HY47	A0A0C2EFL6	A0A0C2DVE6	A0A0C2EGB9	na	A0A0C2EDF5	A0A0C2HUX9	na	A0A0C2HJ07	na	na	na	na	na
1121919	1	0	0	1	1	1	A0A1M6H6B8	na	na	na	na	na	A0A1M6BRQ7	A0A1M6BR53	A0A1M6G746	na	na	na	A0A1M6CR74	A0A1M6F1G9	na
1121922	1	3	1	1	1	1	K6YCT4	na	K6ZCU4	K6YCA9	K7A4G3	K6ZHT3	K6ZBZ3	K6YV63	K6ZNQ4	na	K6ZAL7	na	na	na	na
1121923	1	3	1	1	1	1	H5T864	na	H5TA51	H5T8R3	H5T8R2	H5TB53	H5T7W0	H5T7V9	H5TC39	na	H5TDP6	na	na	na	na
1121925	0	0	0	1	1	1	na	na	na	na	na	na	A0A1T4KQJ9	A0A1T4K4T3	A0A1T4NFI1	na	na	na	A0A1T4JQ04	A0A1T4KM39	na
1121927	1	0	0	1	0	0	L7LDG6	na	na	na	na	na	L7LES3	na	na	na	na	na	na	na	L7LDT6
1121939	1	3	1	1	1	1	S2KMB2	na	S2KL65	S2KR43	S2L7E0	S2L458	S2LB44	S2KIY4	S2L9A3	na	S2KR58	na	na	na	S2KV56
1121942	1	1	1	1	1	1	A0A1M5BW83	na	A0A1M4XZT2	na	na	A0A1M4YD91	A0A1M4T7B2	A0A1M4T7E3	A0A1M4SC76	na	A0A1M4UDJ8	na	na	na	A0A1M5E203
1121945	0	3	0	0	0	0	na	na	A0A1X4G9Z0	A0A1X4H827	A0A1X4H833	na	na	na	na	na	na	na	na	na	A0A1X4H893
1121950	1	0	0	1	1	1	A0A1M6KNU9	na	na	na	na	na	A0A1M6LX54	A0A1M6PCH4	na	A0A1M6NQD0	A0A1M6KBE4	na	A0A1M6KBP8	A0A1M6SLD8	na
1121954	1	3	0	1	1	1	A0A2M9BAQ4	na	A0A2M9AR20	A0A2M9BQW5	A0A2M9BN93	na	A0A2M9BLT6	A0A2M9AQJ3	A0A2M9BA32	na	na	na	na	na	A0A2M9BTL4
1121955	1	2	0	1	1	1	A0A1M6CKE3	na	A0A1M6CKW7	A0A1M6JUL9	na	na	A0A1M6GMP7	A0A1M6C8Z3	A0A1M6CZC0	na	na	na	na	na	A0A1M6KW82
1121959	1	2	0	1	1	1	A0A1M6TLN6	na	A0A1M6TM27	A0A1M6SM05	na	na	A0A1M7CTV3	A0A1M6PP20	A0A1M6RV05	na	na	na	na	na	A0A1M6XWH3
1122133	1	0	0	1	1	1	A0A1M5AKD7	na	na	na	na	na	A0A1M5GJ30	A0A1M5GJA3	A0A1M5D3L2	na	A0A1M4WQR9	na	A0A1M5FZ00	na	na
1122140	1	3	1	1	1	1	A0A3D9DYY1	na	A0A3D9DYG6	A0A3D9E0Z7	A0A3D9DZR4	A0A3D9DUN3	A0A3D9DSV8	A0A3D9DRV4	A0A3D9DUI2	na	A0A3D9DZP5	na	na	na	A0A3D9DZU7
1122142	1	3	1	1	1	1	A0A1H3LS01	na	A0A1H3LS64	A0A1H3LR26	A0A1H3LS29	A0A1H3LQT3	A0A1H3HM49	A0A1H3FJD6	na	A0A1H3F2N3	na	na	A0A1H3HF88	na	na
1122146	0	0	0	1	1	1	na	na	na	na	na	na	A0A0R2KI20	A0A0R2KSE7	na	A0A0R2KIM2	A0A0R2KLL1	na	A0A0R2KI13	A0A0R2KU60	na
1122147	0	0	0	1	1	1	na	na	na	na	na	na	A0A0R1X207	A0A0R1XD50	A0A0R1XGB5	na	A0A0R1XH97	na	A0A0R1XBL8	A0A0R1XHL7	na
1122148	0	0	0	0	0	0	na	na	na	na	na	na	na	na	na	na	A0A0R2K0A8	na	A0A0R2JRH7	na	na
1122150	0	1	0	1	1	1	na	na	A0A0R1QND5	na	na	na	A0A0R1QIX8	A0A0R1Q7Z5	na	A0A0R1QCN2	A0A0R1Q6B5	na	A0A0R1Q8X3	A0A0R1Q746	na
1122151	0	0	0	1	1	0	na	na	na	na	na	na	A0A0R1PHT8	A0A0R1PPN8	na	na	A0A0R1P9G4	na	A0A0R1PIA6	A0A0R1PKG8	na
1122152	0	0	0	0	0	0	na	na	na	na	na	na	na	na	na	na	A0A0R1S2T4	na	A0A0R1RXI2	na	na
1122153	0	1	0	1	1	1	na	na	A0A0R1T3P4	na	na	na	A0A0R1SXI5	A0A0R1SYG0	na	A0A0R1T0E9	A0A0R1T3J5	na	A0A0R1SYW1	A0A0R1T6X8	na
1122154	1	0	0	1	1	2	A0A1K2HHC6	na	na	na	na	na	A0A1K2HDJ6	A0A1K2H4D2	A0A1K2H4G3	A0A1K2HK74	na	na	A0A1K2H4G7	A0A1K2HB55	na
1122155	1	0	0	1	1	1	A0A1M4YC22	na	na	na	na	na	A0A1M4ZYY0	A0A1M4WYX8	na	A0A1M4ZV86	A0A1M4U2A7	na	A0A1M4V565	A0A1M4ZGQ1	na
1122156	2	1	1	1	1	1	A0A1M4V6D7	A0A1M4TGB8	na	na	A0A1M4WY66	A0A1M5DC30	A0A1M4ZSB4	A0A1M4YRJ7	A0A1M4WW70	na	na	na	na	na	A0A1M4WYA9
1122169	1	3	1	1	1	1	A0A0W0YQT4	na	A0A0W0YKW2	A0A0W0YLB1	A0A0W0YKT9	A0A0W0Z880	A0A0W0YTH8	A0A0W0ZB93	na	A0A0W0YSS8	A0A0W0YZR3	na	na	na	A0A0W0YLF1
1122177	1	2	0	1	1	1	A0A2D0N5R2	na	A0A2D0N5Z1	A0A2D0MZL2	na	na	A0A2D0NB81	A0A2D0MY44	A0A2D0NE66	na	A0A2D0MY86	na	na	na	na
1122180	1	3	1	1	1	1	na	A0A017H9C7	A0A017HDN6	A0A017HDA7	A0A017HDU3	A0A017H7P8	A0A017HDJ4	A0A017HDM2	A0A017HHJ8	na	A0A017HHY2	na	na	na	na
1122184	0	1	0	1	1	1	na	na	na	na	A0A1M6BAX1	na	A0A1M6HPH3	A0A1M6HPU7	A0A1M6BF77	na	na	na	A0A1M6AT96	A0A1M6F2K8	na
1122185	1	3	1	1	1	1	A0A0A0EMR7	na	A0A0A0ELL8	A0A0A0ESE5	A0A0A0EPB6	A0A0A0EMS3	A0A0A0EJ13	A0A0A0EP39	A0A0A0ENS6	na	na	na	na	na	na
1122188	1	3	1	1	1	1	A0A1T4Q327	na	A0A1T4QN66	A0A1T4QXL0	A0A1T4QXV1	A0A1T4SDI5	A0A1T4N6K3	A0A1T4N6E6	A0A1T4MQV2	na	na	na	na	na	na
1122189	1	3	1	1	1	1	na	A0A1M6JS87	A0A1M6K8R3	A0A1M6K8T7	A0A1M6JS46	A0A1M6LT78	A0A1M6BSW5	A0A1M6CDZ6	na	A0A1M6M499	na	na	na	na	na
1122192	1	0	0	0	0	0	A0A1T4SSH5	na	na	na	na	na	na	na	na	na	A0A1T4S2K9	na	na	na	na
1122195	1	1	0	1	1	1	na	A0A1M4VHC9	A0A1M4VHZ0	na	na	na	A0A1M4SKW4	A0A1M4SF02	na	A0A1M4Z7L3	A0A1M4YDJ3	na	A0A1M4T4M8	A0A1M4TXL5	na
1122198	2	3	1	1	1	1	A0A1H3ZMR0	A0A1H4EX44	A0A1H4GJL0	A0A1H3ZRN7	A0A1H4BBT1	A0A1H4BPC8	A0A1H4GRD0	A0A1H4GRC1	A0A1H4GTP5	na	na	na	na	na	na
1122204	1	3	1	1	1	1	A0A1H2REV3	na	A0A1H2VFC0	A0A1H2VFG3	A0A1H2VFA8	A0A1H2VF36	A0A1H2S7C6	A0A1H2S8Z2	A0A1H2SDY2	na	A0A1H2T5Q6	na	na	na	na
1122206	1	3	1	1	1	1	A0A1M5I8L4	na	A0A1M5CXQ6	A0A1M5A0S7	A0A1M5A0C6	A0A1M4ZWD3	A0A1M5G7I0	A0A1M5G895	A0A1M5C897	na	A0A1M4T322	na	na	na	A0A1M4X1E9
1122207	1	1	1	1	1	1	X7E4B4	na	na	na	X7E944	X7E6Q6	X7E3I2	X7E180	X7E461	na	X7E854	na	na	na	X7EAZ1
1122208	1	2	0	1	1	1	A0A3D9L5R3	na	A0A3D9KWH0	A0A3D9KWI2	na	na	A0A3D9KXA7	A0A3D9KWQ6	A0A3D9LKZ4	na	A0A3D9L5R1	na	na	na	A0A3D9KXM2
1122209	1	0	1	1	1	1	A0A1K1YYH6	na	na	na	na	A0A1K1YMI4	A0A1K1VZJ2	A0A1K1VY41	A0A1K1W1Y9	na	na	na	na	na	A0A1K1UCF6
1122214	1	1	0	1	1	1	A0A1U9YX82	na	A0A1U9Z427	na	na	na	A0A1U9Z3L0	A0A1U9Z3P6	A0A1U9Z750	na	A0A1U9Z382	na	na	na	A0A1U9Z1N4
1122219	1	3	1	1	1	1	A0A0J6WRV4	na	A0A0J6X0Y5	A0A0J6WZX5	A0A0J6WVF7	A0A0J6WRV2	A0A0J6WTD1	A0A0J6WUB6	A0A0J6WP78	na	na	na	A0A0J6WWG0	A0A0J6WUK1	na
1122229	0	3	0	0	0	0	na	na	A0A3N5C3G3	A0A3N5B5I2	A0A3N5B624	na	na	na	na	na	na	na	na	na	A0A3N5BTC4
1122241	1	0	1	1	1	1	A0A151ATZ2	na	na	na	na	A0A151AWN6	A0A151AXR7	A0A151AXH8	A0A151ATK4	na	na	na	A0A151ATD1	A0A151AZT3	A0A151AWN7
1122245	1	3	1	1	1	1	A0A1N7FM19	na	A0A1N7FJK8	A0A1N7F6P8	A0A1N7FUL2	A0A1N7E734	A0A1N7FZB3	A0A1N7FYY0	A0A1N7FFL1	na	na	na	na	na	na
1122247	1	0	0	1	0	0	K5B7J9	na	na	na	na	na	K5B9N2	na	na	na	K5B940	na	na	na	K5B9I1
1122252	1	0	1	1	1	1	A0A1I1E3B0	na	na	na	na	A0A1I1DTI4	A0A1I1IXP9	A0A1I1J6B1	A0A1I1IUA3	na	na	na	na	na	A0A1I1EJ87
1122261	1	2	1	1	1	1	A0A2T4ZIJ7	na	A0A2T4Z348	na	A0A2T4Z0Z4	A0A2T4Z555	A0A2T4Z524	A0A2T4Z557	A0A2T4Z035	na	na	na	na	na	A0A2T4Z5N9
112234	1	2	0	1	1	1	A0A1N7IB78	na	A0A1N7I4Q4	A0A1N7JTU6	na	na	A0A1N7I9I6	A0A1N7I1D2	A0A1N7IC78	na	na	na	na	na	na
112248	1	3	1	1	1	1	A0A1M4TGQ9	na	A0A1M4XIZ8	A0A1M4XIP8	A0A1M4XIY9	A0A1M4XJ77	A0A1M4TRK7	A0A1M4TRK8	A0A1M4VH62	na	A0A1M5A6I6	na	A0A1M5BA04	A0A1M4ZFY2	na
112268	1	1	0	1	0	0	A0A182WC45	na	A0A182VTH8	na	na	na	A0A182VXJ4	na	na	na	na	A0A182WLA4	na	na	na
1122930	0	0	0	1	1	1	na	na	na	na	na	na	A0A1W2CHM3	A0A1W2CGZ6	A0A1W2A7V0	na	na	na	A0A1W1Z3V3	A0A1W2BJP4	na
1122934	1	0	0	1	1	1	A0A1M6FWB7	na	na	na	na	na	A0A1M6C477	A0A1M6ER10	na	A0A1M6AB77	na	na	A0A1M6DIS2	A0A1M6J171	na
1122935	1	3	1	1	1	1	A0A2U0SPY8	na	A0A2U0SKH0	A0A2U0SKJ3	A0A2U0SKH8	A0A2U0SQ43	A0A2U0SNS2	A0A2U0SNS4	na	A0A2U0T8I7	A0A2U0SMY0	na	na	na	A0A2U0TCY6
1122938	1	3	1	1	1	1	A0A1W1UZZ3	na	A0A1W1UL70	A0A1W1UL58	A0A1W1UM55	A0A1W1V0S6	A0A1W1VA39	A0A1W1V9V3	na	A0A1W1VBF5	na	na	na	na	A0A1W1V606
1122941	1	2	0	0	1	1	A0A0B8XM51	na	A0A0B8YBW2	A0A0B8YAY4	na	na	na	A0A0B8Y0E8	A0A0B8YD16	na	na	na	na	na	A0A0B8XN47
1122953	0	0	0	1	1	0	na	na	na	na	na	na	A0A2S5EJV7	A0A2S5EFY6	na	na	na	na	A0A2S5EAU7	A0A2S5EGJ6	na
1122954	0	0	0	1	1	1	na	na	na	na	na	na	A0A2K1PEG8	A0A2K1PBL1	na	A0A2K1PBE5	na	na	A0A2K1P7F8	A0A2K1PBH6	na
1122955	0	0	0	1	1	1	na	na	na	na	na	na	A0A2K1P5C8	A0A2K1NZU9	na	A0A2K1NZC8	na	na	A0A2K1NX30	A0A2K1NZV1	na
1122956	0	0	0	1	1	0	na	na	na	na	na	na	A0A855MSC9	A0A855MPB8	na	na	na	na	A0A855MNI2	A0A855MPC7	na
1122957	1	2	1	1	1	1	na	A0A8B2QR64	A0A8B2QR71	na	A0A8B2R0X2	A0A8B2QNE8	A0A8B2R229	A0A8B2QRJ1	na	A0A8B2QV39	na	na	na	A0A8B2QNJ0	na
1122961	0	3	0	0	0	0	na	na	Q6L053	A0A8G2L7N2	A0A8G2L848	na	na	na	na	na	na	na	na	na	na
1122984	1	1	1	1	1	1	A0A1P8JDN0	na	na	na	A0A1P8JFQ6	A0A1P8JFH0	A0A1P8JER7	A0A1P8JDN7	A0A1P8JGJ7	na	na	na	na	na	A0A1P8JFI7
1122985	1	1	1	1	1	1	A0A069QGX1	na	na	na	A0A069QK06	A0A069QGL2	A0A069QIU1	A0A069QGG4	A0A069QLA6	na	na	na	na	na	A0A069QG24
1122991	1	1	1	1	1	1	A0A318HYT8	na	na	na	A0A318HRZ6	A0A318HZW0	A0A318IDR1	A0A318HZC8	A0A318I0S9	na	na	na	na	na	A0A318I0G2
1123000	0	0	0	1	0	0	na	na	na	na	na	na	A0A9W6LN68	na	na	na	na	na	na	na	na
1123003	1	3	0	1	1	2	na	A0A1M6A6G2	A0A1M6AV12	A0A1M6AV42	A0A1M6A6I0	na	A0A1M6AHK9	A0A1M6AHH7	A0A1M6DUE8	A0A1M6AHC1	na	na	A0A1M6EK48	A0A1M6G7S2	na
1123010	2	3	1	1	1	1	A0A1I1MGJ6	A0A1I1STY2	A0A1I1FZA6	A0A1I1IV26	A0A1I1IPG1	A0A1I1MSQ9	A0A1I1DVX7	A0A1I1E1A6	A0A1I1JZ72	na	na	na	na	na	na
1123011	1	3	1	1	1	1	A0A285RIV2	na	A0A285RDW8	A0A285RDV1	A0A285RDU4	A0A285RIU5	A0A285RCP2	A0A285RTJ6	na	A0A285RDI8	na	na	A0A285RVQ3	na	na
1123012	1	3	1	1	1	1	A0A1M6FN82	na	A0A1M6FNF8	A0A1M6FNF6	A0A1M6FN48	A0A1M6FMT8	A0A1M6BIV5	A0A1M6CL20	na	A0A1M6BFL5	na	na	A0A1M6BAG5	A0A1M6H5R9	na
1123014	1	3	1	0	1	1	na	A0A1Y6BII7	A0A1Y6B8X6	A0A1Y6BDJ8	A0A1Y6B9X5	A0A1Y6BC99	na	A0A1Y6BSV3	A0A1Y6BZK8	na	A0A1Y6CA88	na	na	na	na
1123016	1	2	1	1	1	1	A0A8D3Y0Z9	na	na	A0A8D3Y2Q9	A0A8D3Y2H2	A0A8D4C350	A0A8D3XZU9	A0A8D4C1X5	A0A8D3XYL5	na	na	na	na	na	na
1123024	1	1	0	0	1	0	A0A511CY27	na	A0A511D356	na	na	na	na	A0A511D1H8	na	na	A0A511D5N8	na	na	na	na
1123029	1	0	0	1	1	1	A0A1M7ZCT6	na	na	na	na	na	A0A1M7ZLJ9	A0A1M7ZLC4	A0A1M7ZD03	na	A0A1M7ZI19	na	na	na	A0A1M7ZCB6
1123042	1	3	1	1	1	2	A0A7X5QJ93	na	A0A7X5TNA1	A0A7X5TMP6	A0A7X5TMK7	A0A7X5TJC9	A0A7X5QMF2	A0A7X5QMT3	A0A7X5QIC3	A0A7X5QPP4	A0A7X5QIV4	na	na	na	A0A7X5QJ88
1123043	1	3	1	1	1	1	A0A8E6BDA0	na	A0A8E6ETE3	A0A8E6EVJ1	A0A8E6B8G7	A0A8E6EVU7	A0A8E6EU79	A0A8E6B5Q5	A0A8E6B8D2	na	A0A8E6B829	na	na	na	A0A8E6B301
1123057	1	2	0	1	1	1	U5BUF8	na	U5BZ45	U5BWJ4	na	na	U5BQ53	U5BU99	U5C251	na	U5C565	na	na	na	U5BVL9
1123062	1	2	1	1	1	1	A0A1I4DX41	na	A0A1I4CJN1	na	A0A1I4CA94	A0A1I4CA63	A0A1I4C8V1	A0A1I4C8T9	A0A1I4C8G9	na	A0A1I4EDX0	na	na	na	A0A1I4C7Y9
1123069	1	1	0	1	1	1	na	S9R7G0	na	na	S9R6S4	na	S9QMN1	S9QMR1	S9QNZ5	na	S9S0R3	na	na	na	S9QU03
1123071	1	2	0	1	1	1	na	A0A1M6LMF7	A0A1M6D3U0	A0A1M6LXQ7	na	na	A0A1M6KTX3	A0A1M6KRH7	A0A1M6RI17	na	na	na	na	na	na
1123231	1	3	1	1	1	1	na	A0A1M7HZY5	A0A1M7F022	A0A1M7EZD1	A0A1M7EZF4	A0A1M7F087	A0A1M7BSQ4	A0A1M7BSN2	A0A1M7A668	na	A0A1M7BWN4	na	A0A1M7BCF8	A0A1M7DVB6	na
1123237	1	0	0	1	1	1	na	S9RDN7	na	na	na	na	S9QL24	S9S4B1	S9R4P3	na	S9RWT8	na	na	na	S9QTP9
1123243	0	3	1	1	1	1	na	na	A0A1M4WCB3	A0A1M4WBW2	A0A1M4T257	A0A1M4SWE6	A0A1M4VBR0	A0A1M4UMY9	na	A0A1M4UN31	na	na	na	na	na
1123245	0	0	0	1	1	1	na	na	na	na	na	na	A0A974BN15	A0A974BLV1	A0A974BLE3	na	A0A974BJ45	na	A0A974BGJ6	A0A974BJ82	na
1123269	1	3	1	1	1	1	W0A7Q4	na	W0AEA4	W0AF43	W0A5V0	W0A3T6	W0ANS5	W0AHV4	W0AGC3	na	W0A7G0	na	na	na	W0ADL3
1123272	1	2	1	1	1	1	A0A1N6FC64	na	na	A0A1N6F569	A0A1N6F586	A0A1N6CY34	A0A1N6CLT4	A0A1N6CM31	A0A1N6CZ81	na	na	na	na	na	A0A1N6CN82
1123281	0	0	0	1	1	1	na	na	na	na	na	na	A0A1M5XTY7	A0A1M5XTY0	A0A1M5X655	na	A0A1M5VCE9	na	A0A1M5SDW7	A0A1M5UCA5	na
1123282	1	0	1	1	1	2	A0A1M5UVI9	na	na	na	na	A0A1M5VFK0	A0A1M5TF60	A0A1M5TF09	A0A1M5YN07	A0A1M5YG44	A0A1M5WAF8	na	A0A1M5TVE2	A0A1M5VFP7	na
1123285	1	3	1	1	1	1	na	A0A1G7I683	A0A1G7NX02	A0A1G7NX05	A0A1G7NX16	A0A1G7IRM8	A0A1G7IFF8	A0A1G7IEX4	A0A1G7IRC8	na	na	na	A0A1G7LH43	na	na
1123286	1	3	0	1	1	2	na	A0A259UA81	A0A259UQ03	A0A259UPV2	A0A259UAN6	na	A0A259US00	A0A259URW6	A0A259V0U6	A0A259URW3	na	na	A0A259U7P2	A0A259UYW8	na
1123289	1	3	0	1	1	1	na	A0A259UKH9	A0A259UY32	A0A259UC74	A0A259UCQ8	na	A0A259UVC4	A0A259UV00	na	A0A259UVB6	na	na	A0A259U8V1	na	A0A259UJ64
1123291	1	3	0	1	1	1	na	A0A1I4H9X7	A0A1I4HC77	A0A1I4HC63	A0A1I4H7Y4	na	A0A1I4KTH5	A0A1I4KTU8	A0A1I4KFX6	na	na	na	A0A1I4KF33	A0A1I4KYC7	na
112331	1	3	1	1	1	1	A0A7W8FSP6	na	A0A7W8FSI7	A0A7W8FT27	A0A7W8FUH9	A0A7W8CTC4	A0A7W8FSN9	A0A7W8FT72	A0A7W8FUF5	na	na	na	A0A7W8CQ03	na	A0A7W8FQN2
1123323	1	2	1	1	1	1	na	A0A1I1ZQI0	A0A1I1ZQ67	na	A0A1I2D201	A0A1I1ZJA6	A0A1I1YXC2	A0A1I1YX89	na	A0A1I1YX46	A0A1I1XNZ4	na	na	A0A1I1XLH3	na
1123324	1	1	1	1	1	1	A0A1T4UZJ0	na	na	na	A0A1T4VBF4	A0A1T4V0V7	A0A1T4VJK0	A0A1T4VKM6	na	A0A1T4UVW7	A0A1T4VWF2	na	na	na	A0A1T4UVX7
1123349	1	3	0	1	1	1	A0A1M6NVI9	na	A0A1M6NVI3	A0A1M6NVQ8	A0A1M6M1R0	na	A0A1M6MWD2	A0A1M6MWC7	A0A1M6N476	na	na	na	A0A1M6RI14	na	na
1123350	1	3	0	1	1	1	A0A1M5P4D7	na	A0A1M5QN30	A0A1M5QN63	A0A1M5QNH1	na	A0A1M5QK06	A0A1M5QK40	A0A1M5RQE2	na	na	na	A0A1M5SBY6	A0A1M5PHE4	na
1123352	0	0	0	1	1	1	na	na	na	na	na	na	A0A1H3DTN1	A0A1H3DVN8	A0A1H2ZYR8	na	A0A1H2RAA5	na	A0A1H2QEM7	A0A1H2R7C6	na
1123357	1	0	0	1	0	0	A0A1M6H436	na	na	na	na	na	A0A1M6CZ81	na	na	na	A0A1M6JT22	na	na	na	A0A1M6CZ91
1123360	1	0	0	1	1	1	na	S9S1H7	na	na	na	na	S9QJH6	S9QCL5	S9QCN4	na	S9QMV8	na	na	na	S9Q7E2
1123362	1	1	1	1	1	1	A0A8G2BII2	na	A0A8G2EYM4	na	na	A0A8G2BIK5	A0A8G2BJ42	A0A8G2BL64	A0A8G2BKL3	na	A0A8G2F2W2	na	na	na	A0A8G2BJZ9
1123365	1	3	1	1	1	1	A0A367VPC3	na	A0A367VUX0	A0A367VV80	A0A367VV35	A0A367V634	A0A367V6G2	A0A367V481	A0A367V434	na	na	na	na	na	A0A367V458
1123366	1	3	1	1	1	1	A0A0B4XPI0	na	A0A0B4XRN3	A0A0B4XX56	A0A0B4XW00	A0A0B4Y3I4	A0A0B4XYB2	A0A0B4Y1X5	A0A0B4XYA6	na	A0A0B4XQH5	na	na	na	A0A0B4Y158
1123367	2	3	1	1	1	1	N6YG90	N6YEZ4	N6Z0R1	N6ZBU2	N6Z5G2	N6ZB24	N6YZJ8	N6YYV2	N6Z9U0	na	na	na	na	na	na
1123369	1	1	1	1	1	1	A0A1M4YSM7	na	A0A1M4YSP6	na	na	A0A1M4Z5W9	A0A1M5A1R3	A0A1M5A1M7	A0A1M4WKK3	na	na	na	A0A1M4SQG9	A0A1M4VBB1	na
1123380	1	1	0	1	1	1	na	A0A1M5QNV7	A0A1M5U6U4	na	na	na	A0A1M5R0V1	A0A1M5SDR2	na	A0A1M5QQB5	na	na	A0A1M5RQ22	na	A0A1M5SFT6
1123382	1	3	0	1	1	1	A0A1M5Q8Y7	na	A0A1M5PDF0	A0A1M5PD70	A0A1M5PD96	na	A0A1M5P9I6	A0A1M5P9J8	na	A0A1M5P9K1	na	na	na	na	na
1123384	1	1	1	1	1	1	na	A0A0X1KP60	A0A0X1KP70	na	na	A0A0X1KRZ6	A0A0X1KNX5	A0A0X1KSE9	na	A0A0X1KS64	A0A0X1KSD9	na	na	na	A0A0X1KS32
1123397	1	3	1	1	1	1	na	A0A1I1U366	A0A1I1U6M7	A0A1I1QLU1	A0A1I1QYA0	A0A1I1N6L7	A0A1I1QXT5	A0A1I1QPR3	A0A1I1NAW5	na	na	na	na	na	na
1123402	1	0	0	1	1	1	A0A1H9ZT82	na	na	na	na	na	A0A1I0BZX9	A0A1I0BZV3	A0A1I0BCF0	na	na	na	na	na	A0A1I0ETS5
1123403	1	0	1	1	1	1	A0A1U7M3P5	na	na	na	na	A0A1U7M725	A0A1U7M393	A0A1U7M2X8	A0A1U7M970	na	A0A1U7M3T9	na	A0A1U7M3F9	A0A1U7M778	na
1123404	1	0	0	1	1	1	A0A1M4ZV17	na	na	na	na	na	A0A1M4ZER1	A0A1M4ZEX1	A0A1M4VZX8	na	A0A1M4S7P9	na	A0A1M4SVP5	A0A1M4SBH5	na
1123491	1	3	1	1	1	1	A0A1T4LIP6	na	A0A1T4LYD0	A0A1T4RHW3	A0A1T4RI44	A0A1T4RX84	A0A1T4N9G4	A0A1T4N9J9	A0A1T4S9M7	na	na	na	na	na	A0A1T4RRA0
1123492	1	3	1	1	1	1	A0A1M5C851	na	A0A1M4Z9B0	A0A1M4ZB81	A0A1M4ZB77	A0A1M5BPS5	A0A1M5G7C9	A0A1M5G757	A0A1M5H5E1	na	na	na	na	na	A0A1M5BPZ7
1123498	1	3	1	1	1	1	A0A1R4LTP2	na	A0A1R4L879	A0A1R4LNY1	A0A1R4LPI9	A0A1R4L8M6	A0A1R4LMY5	A0A1R4LNG7	A0A1R4LPG6	na	na	na	na	na	A0A1R4L8N1
1123500	0	0	0	1	1	0	na	na	na	na	na	na	A0A0R2GAE8	A0A0R2FVJ2	na	na	A0A0R2FX58	na	A0A0R2G548	A0A0R2G9P5	na
1123501	1	0	0	1	1	1	na	A0A0D0Q0Q3	na	na	na	na	A0A0D0PBD5	A0A0D0QCD0	A0A0D0QF54	na	A0A0D0QCQ0	na	na	na	A0A0D0QF43
1123755	1	0	0	1	1	1	na	A0A1I6LMC5	na	na	na	na	A0A1I6MCG2	A0A1I6MBJ1	A0A1I6MUY9	na	A0A1I6LY27	na	na	na	A0A1I6MTN8
1123756	1	0	0	1	1	1	na	A0A1X4N9Y0	na	na	na	na	A0A1X4NNG3	A0A1X4NLN3	A0A1X4NR12	na	A0A1X4NKL1	na	na	na	A0A1X4NGA2
1123773	1	3	1	1	1	1	A0A1J8PTX5	na	A0A1J8PDG0	A0A1J8PA58	A0A1J8Q5T2	A0A1J8PHD1	A0A1J8PCQ4	A0A1J8PC15	A0A1J8PR88	na	na	na	na	na	A0A1J8P5P5
1123866	1	0	1	1	1	1	J4KS77	na	na	na	na	J5KFG3	J5KE63	J4WSB6	na	J5K9W8	na	na	na	na	na
1123867	1	0	1	1	1	1	J4KSJ8	na	na	na	na	J4KSD9	J4V1C2	J4V190	na	J5KDM2	na	na	na	na	na
112413	1	3	0	0	1	0	A0A1I5GCH0	na	A0A1I5W7L7	A0A1I5WK30	A0A1I5WK75	na	na	A0A1I5N6K0	na	na	A0A1I5MX33	na	A0A1I5FTU8	na	A0A1I5WGF1
112416	1	0	0	1	0	0	A0A8H6CLU5	na	na	na	na	na	A0A8H6FTP3	na	na	na	A0A8H6FTD2	A0A8H6FWQ2	na	na	na
1124188	1	2	0	1	1	1	A0A1M5C0M4	na	A0A1M4YNX5	A0A1M5B606	na	na	A0A1M5CJU4	A0A1M4XRF1	A0A1M5BS57	na	na	na	na	na	A0A1M5BTI1
1124626	1	0	0	0	0	0	A0A1B4XY32	na	na	na	na	na	na	na	na	na	A0A1B4Y750	na	na	na	na
1124627	0	0	0	0	0	0	na	na	na	na	na	na	na	na	na	na	I2JQD4	na	na	na	na
1124743	1	0	0	0	1	0	A0A4Q7WPW2	na	na	na	na	na	na	A0A4Q7XDD7	na	na	A0A4Q7WKI0	na	A0A4Q7WQT5	na	na
1124744	1	0	0	0	1	0	A0A4R0I676	na	na	na	na	na	na	A0A4R0JBX7	na	na	A0A4R0HVN8	na	A0A4R0IL65	na	na
1124761	1	0	0	0	1	0	A0A7X0C1I2	na	na	na	na	na	na	A0A7X0C104	na	na	A0A7X0F308	na	na	na	na
1124835	1	2	0	1	1	1	A0A1M7N7T4	na	A0A1M7KQM7	A0A1M7ABD5	na	na	A0A1M7CJT4	A0A1M7J420	A0A1M7LCB6	na	na	na	na	na	na
112498	1	0	0	1	0	0	A0A2D3VHM3	na	na	na	na	na	A0A2D3V2F5	na	na	na	A0A2D3V1I7	A0A2D3V731	na	na	na
1124982	1	1	0	1	1	1	I0X910	na	I0X6C6	na	na	na	I0X9R2	I0X644	na	I0X8E9	na	na	na	na	I0X5Q5
1124983	2	3	1	1	1	1	A0A2C9EGI1	A0A2C9EW04	A0A2C9EQ96	A0A2C9ES72	A0A2C9EPS3	A0A2C9EJG4	A0A2C9ET93	A0A2C9ESY6	A0A2C9EFH8	na	A0A2C9EJX6	na	na	na	A0A2C9ESU9
1124991	1	3	1	1	1	1	J7TRM1	na	J7SKU9	J7U910	J7U892	M1RI09	M1SD06	J7TE93	J7UAY3	na	M1SDS4	na	na	na	J7TQ35
1124992	0	0	0	0	0	0	na	na	na	na	na	na	na	na	na	na	na	na	A0A9N7BAV5	na	na
112509	1	0	0	1	0	0	A0A8I7B412	na	na	na	na	na	A0A8I6YSZ4	na	na	na	A0A8I6YCI9	F2EF01	na	na	na
1125411	1	1	1	1	1	1	na	A0A0M4M0S5	A0A0M3T265	na	na	A0A0M5KRQ7	A0A0M4LZE1	A0A0M3T1L8	na	A0A0M4LPC7	na	na	na	na	na
1125630	1	3	1	1	1	1	A0A0H3GVG9	na	A0A0H3H223	A0A0H3GSC0	A0A0H3GNL1	A0A0H3GWV5	A0A0H3GJ23	A0A0H3GSL9	A0A0H3GM97	na	A0A0H3GJ10	na	na	na	A0A0H3H477
1125699	0	1	0	1	1	1	na	na	na	na	S3K0C4	na	S3L298	S3K1T8	na	S3K0T8	S3K3B2	na	na	na	S3K0L8
1125702	0	0	0	1	1	1	na	na	na	na	na	na	S3L8V9	S3MF79	na	S3L9E1	na	na	na	na	S3MCJ9
1125712	1	1	0	1	1	1	U2TTB5	na	U2VBR2	na	na	na	U2UYL2	U2TPM4	na	U2T5C5	na	na	U2V8S2	na	U2V579
1125717	1	0	0	1	0	0	J0NMG2	na	na	na	na	na	J1HYX7	na	na	na	J0MTE2	na	na	na	J0NVT5
1125718	1	0	0	0	0	0	J1HMJ5	na	na	na	na	na	na	na	na	na	J0NMJ3	na	na	na	na
1125720	1	2	0	1	1	1	J0MV68	na	J0MLD2	J0N0B4	na	na	J0MZW2	J1GSS7	na	J1GX96	na	na	na	na	na
1125721	1	2	0	1	1	1	I9E5X6	na	I9E4N0	I8UP10	na	na	I9P9C7	I8UQG4	na	I8UL93	na	na	na	na	na
1125723	1	3	1	1	1	1	J5VXD8	na	J6H2H9	J5TXM2	J5TVH4	J5TU68	J5TVW2	J5TVR8	J5VV99	na	na	na	na	na	na
1125724	1	0	0	1	0	0	I0US30	na	na	na	na	na	I0UUN6	na	na	na	na	na	na	na	I0UUL7
1125725	1	1	0	1	1	1	na	U2L6P7	U1GPT5	na	na	na	U1FJQ8	U1F6T5	na	U1GQ69	U1GXZ8	na	U2MZ83	na	U2MZU5
1125747	1	3	1	1	1	1	K6W8J1	na	K6XC52	K6X100	K6XH62	K6Y378	K6XC07	K6WW17	K6X3Q6	na	K6XGJ3	na	na	na	na
1125779	1	0	0	1	0	0	S2YYA5	na	na	na	na	na	S2ZDH3	na	na	na	S2Z6M0	na	na	na	S2ZWD1
1125847	1	2	1	1	1	1	L0NF02	na	L0NDC7	na	L0NMQ2	L0NG86	L0NGU2	L0NEI1	L0NLN3	na	L0NAC7	na	na	na	L0NLJ3
1125876	1	2	0	1	1	1	A0A1I3GGX9	na	A0A1I3FRF2	A0A1I3I1G6	na	na	A0A1I3GPC2	A0A1I3DYF5	A0A1I3IS98	na	na	na	na	na	na
1125964	1	3	1	1	1	1	na	A0A2G1MJA4	A0A2G1MH90	A0A2G1MH38	A0A2G1MH49	A0A2G1MD85	A0A2G1MF43	A0A2G1MF51	A0A2G1MDN5	na	A0A2G1MDF4	na	na	na	na
1125966	1	3	1	1	1	1	A0A8D5UFJ5	na	A0A8D5ZN85	A0A8D5ZMP4	A0A8D5ZN73	A0A8D5ZN48	A0A8D5UG30	A0A8D5UFG3	A0A8D5ZLV9	na	na	na	na	na	na
1125967	1	3	1	1	1	1	A0A938XVZ0	na	A0A938Y068	A0A938XWW0	A0A938XWC9	A0A938XYW9	A0A938XTU1	A0A938XT64	A0A938Y0K6	na	A0A938XUG5	na	A0A938Y0K3	na	A0A938XUJ7
1125972	1	3	0	0	0	0	A0A229R8P5	na	A0A229RC32	A0A229RBY5	A0A229RCF1	na	na	na	na	na	A0A229R6P9	na	A0A229S240	na	A0A229RAU6
1125979	1	3	1	1	1	1	H4EZR9	na	H4F051	H4F050	H4F052	H4F9S3	H4F119	H4F118	H4F2D0	na	H4F5Q7	na	na	na	H4FCI6
1126212	1	0	0	1	0	0	K2SQ00	na	na	na	na	na	K2RSN2	na	na	na	K2S2A0	K2SRI1	na	na	na
1126245	0	3	1	0	0	0	na	na	A0A368N9I1	A0A368NDC5	A0A368ND04	A0A368NEH1	na	na	na	na	na	na	na	na	A0A368NAU4
1126616	1	3	1	1	1	1	A0A150Z6Q8	na	A0A150Z4T8	A0A150Z4V2	A0A150Z8X8	A0A150Z858	A0A150ZJ79	A0A150Z8I8	A0A150ZGN5	na	na	na	na	na	na
1126627	1	3	1	1	1	1	A0A0S6UZ66	na	A0A0S6UKC1	A0A0S6UYH6	A0A0S6USL5	A0A0S6UV78	A0A0S6UTE9	A0A0S6UWU9	A0A0S6UHS1	na	na	na	na	na	na
1126814	0	0	0	1	0	0	na	na	na	na	na	na	A0A9W8LP22	na	na	na	na	A0A9W8HG06	na	na	na
1126833	1	3	1	1	1	1	A0A0D5NGZ9	na	A0A0D5NIM4	A0A0D5NQW3	A0A0D5NJX1	A0A0D5NJE5	A0A0D5NM61	A0A0D5NLD6	A0A0D5NHG9	na	A0A0D5NDW5	na	na	na	na
1127122	1	3	1	0	1	1	I2DGJ5	na	I2DGJ9	I2DGK0	I2DG27	I2DHN5	na	I2DF54	na	I2DEG9	na	na	na	na	na
1127134	1	0	0	1	0	0	H6RAY8	na	na	na	na	na	H6R8M3	na	na	na	H6R5T3	na	na	na	H6R8M4
1127439	1	3	1	0	1	2	A0A828YKW7	na	A0A828YQS4	A0A828YNT9	A0A828YPU5	A0A828YKJ1	na	A0A828YTH4	A0A828YKE6	A0A828YST2	A0A828YR03	na	na	na	A0A828YPD7
1127483	2	3	1	1	1	1	H1S5P3	H1S6E4	H1S881	H1S880	H1SFB5	H1S7I3	H1S2E7	H1S2E6	H1S3C8	na	na	na	na	na	H1RZ44
1127673	1	3	1	1	1	1	K6YUT5	na	K6YSE8	K6XQI6	K6YRK0	K6WY14	K6YH36	K6X5N9	K6YQP2	na	K6WXJ8	na	na	na	na
1127690	1	0	0	1	0	0	L1PKM6	na	na	na	na	na	L1PFH1	na	na	na	na	na	na	na	L1PG90
1127691	1	2	0	1	1	1	L1PNK0	na	L1PQI1	L1PF21	na	na	L1PDS9	L1PGK2	na	L1PD72	na	na	na	na	na
1127692	1	2	0	1	1	1	L1NVU0	na	L1NWF9	L1PC48	na	na	L1P6H4	L1P5J9	na	L1NUT2	na	na	na	na	na
1127693	1	2	0	1	1	1	L1NUK5	na	L1NYZ4	L1NM82	na	na	L1NZ22	L1NPL4	na	L1NXZ4	na	na	na	na	na
1127694	1	1	1	1	1	1	na	L1NT02	na	na	L1NT93	L1NQG5	L1NV24	L1NZK8	na	L1NY57	na	na	na	na	L1NR90
1127695	2	3	1	1	1	1	L1N900	L1MVS8	L1MV62	L1MVU9	L1MV35	L1NFD6	L1NEW4	L1N6J8	na	L1N6D7	na	na	na	na	na
1127696	1	3	1	1	1	1	L1NHG2	na	L1NB77	L1NET0	L1NBA5	L1NFA6	L1NFQ4	L1NBY0	L1NA61	na	na	na	na	na	na
1127699	1	1	1	1	1	1	L1NI72	na	na	na	L1NGL5	L1N6D0	L1N0N5	L1NFD7	L1NFU9	na	na	na	na	na	L1N6T6
1127743	1	3	1	1	1	1	I2HSH6	na	I2HQB0	I2HQB1	I2HQA9	I2HQB2	I2HTN1	I2HTN2	I2HNX9	na	na	na	I2HSK4	na	I2HS90
1127984	1	3	0	1	1	1	A0A942A697	na	A0A941W560	A0A941ZZ99	A0A941W016	na	A0A942A2V5	A0A941W4J2	na	A0A941VZ64	na	na	na	na	na
1128330	1	3	1	1	1	1	A0A2Z3G0H5	na	A0A2Z3G804	A0A2Z3GD27	A0A2Z3G7P6	A0A2Z3G4I3	A0A2Z3FWS2	A0A2Z3G2P6	A0A2Z3G794	na	A0A2Z3FU67	na	na	na	A0A2Z3G441
1128331	1	3	1	1	1	1	A0A2U8G2L7	na	A0A2U8GAU6	A0A2U8GAL9	A0A2U8GAL6	A0A2U8G3U2	A0A2U8G4I5	A0A2U8G260	A0A2U8G8K1	na	A0A2U8FXE7	na	na	na	A0A2U8G564
1128334	1	3	1	1	1	1	A0A249PS63	na	A0A249Q444	A0A249Q4B3	A0A249Q439	A0A249PVQ4	A0A249PTP2	A0A249PST8	A0A249PZD6	na	A0A249PP18	na	na	na	A0A249PWA0
1128398	1	3	0	1	1	1	K0B395	na	K0B0P2	K0B342	K0B4U8	na	K0AZE3	K0AW07	K0AY03	na	na	na	K0AWX5	K0AYM2	na
1128399	1	3	1	0	1	1	A0A0M3GIA9	na	A0A0M3GRQ9	A0A0M3GQH0	A0A0M3GQA3	A0A0M3GKU9	na	A0A0M3GV63	A0A0M3GQY9	na	A0A0M3GJ35	na	na	na	A0A0M3GQR5
1128425	1	0	0	1	0	0	A0A0D7A7N1	na	na	na	na	na	A0A0D7AGC2	na	na	na	A0A0D7A5V9	A0A0D7A7W8	na	na	na
1128664	1	3	0	0	0	0	A0A542DN47	na	A0A542CS96	A0A542DPP9	A0A542DPQ7	na	na	na	na	na	A0A542CUH4	na	na	na	na
1128670	1	3	1	1	1	1	A0A7X3SM42	na	A0A7X3MRZ5	A0A7X3SR09	A0A7X3MVC1	A0A7X3SND1	A0A7X3SRT1	A0A7X3SS17	A0A7X3MQU0	na	na	na	na	na	A0A7X3MQ92
1128676	1	1	0	0	1	0	A0A561SSL1	na	A0A561SV59	na	na	na	na	A0A561SMY8	na	na	A0A561SP98	na	na	na	na
1128677	1	0	0	0	0	0	A0A7X5ZPC6	na	na	na	na	na	na	na	na	na	A0A7X5ZPT2	na	na	na	na
1128680	1	0	0	0	1	0	A0A6G4U1J1	na	na	na	na	na	na	A0A6G4U716	na	na	A0A6G4TSI7	na	A0A6G4UDG4	na	na
1128761	1	3	1	1	1	1	A0A6V9XLQ8	na	A0A6V9XIS5	A0A6V9XKT5	A0A6V9XQW9	A0A6V9XI68	A0A6V9XK28	A0A6V9XK02	A0A6V9XIH2	na	A0A6V9XLT5	na	A0A6V9XHU3	na	A0A6V9XII3
1128912	1	3	1	1	1	1	K6Z2I4	na	K6ZSL3	K6Z527	K6Z927	K6Z3S2	K6Z4J8	K6Z0K9	K6YPJ6	na	K6XZW0	na	na	na	na
1128970	1	2	0	1	1	1	A0A1G9BN69	na	A0A1G8S8U3	A0A1G9B4U7	na	na	A0A1G9CDC5	A0A1G9B3B4	A0A1G8RXE8	na	na	na	na	na	A0A1G8S390
112901	1	3	0	1	1	2	na	A0A1W2E981	A0A1W2A4X1	A0A1W2A5Z5	A0A1W2E9T5	na	A0A1W2AGX6	A0A1W2AHG3	A0A1W2CXI6	A0A1W2AGV5	na	na	A0A1W1ZVS1	na	na
112903	1	3	0	1	1	2	na	A0A1H8PA65	A0A1H8NK87	A0A1H8NK57	A0A1H8PA81	na	A0A1H8NXG3	A0A1H8NXS6	A0A1H8VXA1	A0A1H8NXR9	na	na	A0A1H8VN97	A0A1H8V2S0	na
112904	0	0	0	1	1	2	na	na	na	na	na	na	A0A1V8YX44	A0A1V8YX59	A0A1V8YDJ3	A0A1V8YD75	A0A1V8YWK5	na	A0A1V8YC99	A0A1V8YD23	na
1129133	1	2	1	1	1	1	A0A7X5XNB1	na	na	A0A7X5XQJ4	A0A7X5XQI7	A0A7X5XP51	A0A7X5XN75	A0A7X5XPX8	A0A7X5XQS6	na	na	na	na	na	A0A7X5XNI3
1129367	2	3	1	1	1	1	A0A0F6AF49	A0A0F6AA41	A0A0F6ADN8	A0A0F6AG21	A0A0F6AIA2	A0A0F6A420	A0A0F6ACF0	A0A0F6ACM4	A0A0F6A8R6	na	A0A0F6A509	na	na	na	na
1129374	1	3	1	1	1	1	H3ZBR5	na	H3Z9V9	H3ZJE6	H3ZJE5	H3ZHC5	H3ZGM4	H3ZGM3	H3ZGQ7	na	na	na	na	na	na
1129793	2	3	1	1	1	1	K6YSE3	K7AI90	K6YP40	K6ZHA7	K7AJI2	K6ZXM9	K6ZZW5	K6ZVF2	K7AAJ0	na	K6YHK9	na	na	na	na
1129794	2	3	1	1	1	1	K6Z2U2	K7A6H1	K7ATN9	K7AJ47	K6Z686	K7A0N3	K7AVN8	K7AVN1	M4RVP4	na	K7AV44	na	na	na	na
1129896	1	0	0	1	1	0	K8XK26	na	na	na	na	na	K8XUN1	K8XIT7	na	na	K8X6Y8	na	na	na	K8Y1N5
1129897	1	1	1	1	1	1	I4EDP4	na	na	na	I4ECX1	I4EHQ5	I4EI94	I4ECE0	I4EGI2	na	I4EDZ2	I4EI65	I4EJY8	na	I4EFN6
1130046	0	0	0	1	1	1	na	na	na	na	na	na	A0A6I8MF92	A0A6I8MC93	na	A0A6I8MAA9	na	na	na	na	A0A6I8M5K7
1130080	0	0	0	1	1	1	na	na	na	na	na	na	A0A1H6UHL4	A0A1H6UKK8	A0A1H6RTL1	na	A0A1H6V296	na	A0A1H6R8T3	A0A1H6S4A9	na
1130798	1	0	0	0	0	0	A0A0D4CIU9	na	na	na	na	na	na	na	na	na	A0A0D4CHX9	na	A0A0D4CIR3	na	na
1130819	1	0	0	1	1	1	A0A4U2Z1J8	na	na	na	na	na	A0A4U2ZFG2	A0A4U2ZEJ8	A0A4U2Z7B2	na	na	na	A0A4U2YMA6	A0A4U2YQY3	na
1130820	1	1	0	0	0	0	A0A086JTX6	na	A0A086JMR0	na	na	na	na	na	na	na	na	na	na	na	na
1130821	1	1	0	0	0	0	A0A151HDI3	na	A0A151H5H5	na	na	na	na	na	na	na	na	na	na	na	na
1130832	1	1	0	0	0	0	M7X101	na	M7X9K4	na	na	na	na	na	na	na	M7WZT8	M7WW78	na	na	na
1130993	0	0	0	1	1	1	na	na	na	na	na	na	H9BWN6	H9BWN7	H9BWM9	na	na	na	na	na	na
1130995	0	0	0	0	0	0	na	na	na	na	na	na	na	na	na	na	na	na	na	na	H9BWU6
1130996	0	0	0	0	0	1	na	na	na	na	na	na	na	na	H9BWK0	na	na	na	na	na	na
1131	1	3	1	1	1	1	A0A8H9XAZ6	na	A0A8H9XA63	A0A920I6Y4	A0A8H9XBK1	A0A8H9XF59	A0A920I7U5	A0A8H9XEP5	A0A8H9XCF0	na	na	na	na	na	A0A8I0C4C9
113107	1	3	1	1	1	2	A0A428HNG3	na	A0A4V0BXA8	A0A4V0BUK0	A0A4V0BUX7	A0A4V0BXX4	A0A3R9MGB3	A0A428HSL2	A0A428HRJ9	A0A4V0C0G5	na	na	A0A3R9MF83	A0A3R9L2G7	na
113115	1	1	0	1	0	0	A0A7L1NSU6	na	A0A7L1NN46	na	na	na	A0A7L1NQH9	na	na	na	na	A0A7L1ND42	na	na	na
1131292	1	0	0	1	1	2	A0A1E5HBN8	na	na	na	na	na	A0A1E5HFN7	A0A1E5HFM0	A0A1E5H5I3	A0A1E5HFQ4	A0A1E5HES4	na	A0A1E5H888	A0A1E5HCR1	na
1131455	0	0	0	0	0	0	na	na	na	na	na	na	na	na	na	na	na	na	I1A5I2	na	na
1131462	1	3	1	1	1	2	K4LE66	na	K4L699	K4L868	K4L5K5	K4KZ20	K4L0S4	K4LEB2	K4L0A1	K4L0G6	na	na	na	na	na
1131553	1	3	1	1	1	1	na	A0A1N6HAW2	A0A1N6JKK6	A0A1N6G6L6	A0A1N6G6I6	A0A1N6IRH6	A0A1N6I4P6	A0A1N6I4U4	A0A1N6INC0	na	na	na	na	na	na
1131564	0	0	0	1	0	0	na	na	na	na	na	na	A0A9W9W789	na	na	na	na	A0A9X0B5A9	na	na	na
1131581	0	0	0	1	0	0	na	na	na	na	na	na	A0A9W9F011	na	na	na	na	A0A9W9FD70	na	na	na
1131730	1	0	1	1	1	1	W1SBA0	na	na	na	na	W1SCV8	W1SIS5	W1SG27	W1SGP1	na	na	na	W1SF93	W1SNE3	W1SDU2
1131731	1	3	1	1	1	1	K6DGY5	na	K6E4X0	K6D701	K6CAY5	K6D545	K6D9F3	K6C1A4	K6DYX1	na	na	na	K6DBS9	na	na
1131820	1	0	0	0	0	0	H6WNT4	na	na	na	na	na	na	na	na	na	na	na	na	na	na
1131935	1	3	1	1	1	1	H3SKQ8	na	H3SNA3	H3SNA4	H3SNA2	H3SNA5	H3SNV9	H3SNZ6	H3SKR0	na	H3SM25	na	H3SGT4	na	H3SGC4
1132028	1	3	1	1	1	1	A0A4R2L190	na	A0A4R2KQQ8	A0A4R2KWR8	A0A4R2L400	A0A4R2KY61	A0A4R2L061	A0A4R2L7C0	A0A4R2KKY3	na	A0A4R2KRR2	na	na	na	A0A4R2KXF6
113226	1	0	0	1	0	0	A0A139I750	na	na	na	na	na	A0A139IGI3	na	na	na	A0A139IT37	A0A139I6H5	na	na	na
1132417	1	2	1	1	1	1	A0A8G1ZLU7	na	na	A0A8G1ZGN1	A0A8G1ZEX7	A0A8G1ZHH0	A0A8G1ZHU1	A0A8G2E0N2	A0A8G2DZG3	na	na	na	na	na	A0A8G1ZLK6
1132509	1	3	0	0	0	0	M0LUJ6	na	M0LTL4	M0LUR1	M0M9I9	na	na	na	na	na	M0LXK0	na	na	M0LXM5	M0M5V0
1132637	0	0	0	1	0	0	na	na	na	na	na	na	A0A9W9PU06	na	na	na	na	A0A9W9GS38	na	na	na
113268	1	3	1	1	1	1	A0A1Z5H7R9	na	A0A1Z5HCG9	A0A1Z5H8A1	A0A1Z5HA47	A0A1Z5HAV5	A0A1Z5H8M2	A0A1Z5H879	A0A1Z5HE94	na	na	na	na	na	na
1132694	2	3	1	1	1	1	A0A5D4XPZ2	A0A5D4XQM5	A0A5D4XSB7	A0A5D4XEH8	A0A5D4XEU0	A0A5D4XRF4	A0A5D4XWD8	A0A5D4XRG9	A0A5D4XMI2	na	na	na	na	na	A0A5D4XRJ0
1132836	1	3	1	1	1	1	J4TBZ6	na	J5PYT8	J4T9K1	J6DPP7	J6DMQ2	J6DUN0	J5Q9Y2	J5MJQ5	na	J5MJE3	na	na	na	J5PXD2
1133106	1	3	1	1	1	1	na	A0A4R2LGI2	A0A4R2L7K8	A0A4R2L902	A0A4R2L6S3	A0A4R2L405	A0A4R2L6D9	A0A4R2LNS5	A0A4R2L6Q5	na	na	na	na	na	na
1133319	1	2	1	1	1	1	A0A840CRM8	na	A0A840CVW3	na	A0A840D4G6	A0A840CW82	A0A840CYJ1	A0A840CRJ0	na	A0A840CSG5	na	na	na	na	A0A840D1Y3
1133329	1	3	1	1	1	1	A0A0F3R9D1	na	A0A0F3REA9	A0A0F3RA26	A0A0F3RAA8	A0A0F3R6F3	A0A0F3R719	A0A0F3RCC5	na	A0A0F3R7L8	na	na	na	na	A0A0F3R7P0
1133344	1	3	1	1	1	1	A0A7W6GEE9	na	A0A7W6D420	A0A7W6D0L0	A0A7W6D224	A0A7W6D3D0	A0A7W6D2R8	A0A7W6D117	A0A7W6D1E6	na	na	na	na	na	A0A7W6D1G9
1133546	1	0	0	0	0	0	A0A5P9Q6U5	na	na	na	na	na	na	na	na	na	A0A5P9QDK8	na	na	na	na
1133559	1	3	1	1	1	1	A0A4S2HAQ7	na	A0A4V3RZE4	A0A4S2HB95	A0A4S2HB57	A0A4S2HDM7	A0A4S2HEM5	A0A4S2HFP2	A0A4S2HBQ5	na	na	na	na	na	na
1133568	0	0	0	1	1	1	na	na	na	na	na	na	J9UQG9	J9UK44	na	J9UQV3	J9U229	na	J9TQR5	na	J9U2V5
1133569	0	2	1	1	1	1	na	na	A0A0R2C9Z7	na	A0A0R2CMT1	A0A0R2CD64	A0A0R2CAQ7	A0A0R2CC21	na	A0A0R2C925	A0A0R2CAN9	na	A0A0R2C4N7	A0A0R2CCS6	na
1133592	0	0	0	0	1	0	na	na	na	na	na	na	na	L7VFV6	na	na	na	na	na	na	na
1133849	1	3	0	1	1	0	K0ELT8	na	K0F544	K0F0H8	K0ES65	na	K0EL46	K0F4B7	na	na	K0EWQ1	na	na	na	K0EG63
1133850	1	1	0	0	1	0	H2JM68	na	H2JP35	na	na	na	na	H2JRB7	na	na	H2K788	na	na	na	na
1133852	1	3	1	1	1	2	A0A0E0XX72	na	A0A0E0XVI4	A0A0E0XV24	A0A0E0Y476	A0A0E0XVF6	A0A0E0Y377	A0A0E0Y6E5	A0A0E0Y6K7	A0A0E0Y1F8	A0A0E0Y0C7	na	A0A0E0XW53	na	A0A0E0XUG6
1133968	0	0	0	1	0	0	na	na	na	na	na	na	A0A0K3AMB5	na	na	na	na	na	na	na	na
1134406	1	0	0	1	1	1	A0A0P6XY95	na	na	na	na	na	A0A0N8GL46	A0A0P6Y2K7	A0A0P6XDX8	na	na	na	na	A0A0P6WMK7	A0A0P6WVW3
1134435	2	3	1	1	1	1	A0A127K4B1	A0A140IDP6	A0A127K418	A0A127K990	A0A127K989	A0A127K720	A0A127KA74	A0A127KA37	A0A140IDQ8	na	na	na	na	na	na
1134457	1	3	1	1	1	1	L7E8E8	na	L7EEF8	L7E098	L7E7N3	L7EAW2	L7E138	L7ECS6	L7E7R3	na	na	na	na	na	na
1134474	1	3	1	1	1	1	I3IAR5	na	I3IB28	I3I7Z9	I3I7Z8	I3I9G9	I3IBR7	I3IBR8	I3I5R1	na	I3I760	na	na	na	na
1134510	1	0	0	1	0	0	A0A067W862	na	na	na	na	na	A0A067W6S0	na	na	na	na	na	na	na	A0A067WGT1
1134687	1	3	1	1	1	2	A0A2J5NDU9	na	A0A249WKA2	A0A7H4M796	A0A0J2LE24	A0A181XE04	A0A2J4R4S1	A0A0J5NKG9	A0A0J2H1A1	A0A6P1UY88	A0A0J2K547	na	A0A0J2HHN3	na	A0A0J2H5V4
1134788	0	0	0	1	0	0	na	na	na	na	na	na	A0AA37DY59	na	na	na	na	na	A0AA36YZV5	na	na
1134802	0	0	0	1	1	2	na	na	na	na	na	na	J8ZRC2	J8ZRC8	J9A935	J8ZH68	J9A3G0	na	J8Z3S5	J8ZPV4	na
1134806	0	0	0	1	1	2	na	na	na	na	na	na	J6Y3Y3	J7CUC7	J7CTE5	J6YT09	J7CV79	na	J6K634	J6Z040	na
1134823	0	0	0	1	1	2	na	na	na	na	na	na	A0A9P2S2T2	A0A9P2S3X5	A0A9P2W3Y2	A0A9P2W4Y5	A0A9P2W7V4	na	A0A9P2S6K0	A0A9P2S463	na
113540	1	1	0	1	0	0	A0A0N8K0P0	na	A0A0P7UT15	na	na	na	A0A0P7USU6	na	na	na	na	A0A0P7Y845	na	na	na
113557	0	0	0	1	0	0	na	na	na	na	na	na	A0AA46ZAX3	na	na	na	na	na	A0AA46USU1	na	na
113559	1	2	0	0	0	0	A0A7W5AGA6	na	A0A7W5AIB3	A0A7W5AKK4	na	na	na	na	na	na	na	na	na	na	na
113560	1	1	0	0	0	0	A0A919SKM7	na	A0A919SLC9	na	na	na	na	na	na	na	A0A919SLA0	na	na	na	na
113562	1	1	0	0	0	0	A0A1H2CYA1	na	A0A1H2A2X4	na	na	na	na	na	na	na	na	na	na	na	na
113564	1	2	0	0	0	0	A0A919IVV0	na	A0A919J990	A0A919MNG1	na	na	na	na	na	na	A0A919JAG3	na	na	na	A0A919MQZ4
113567	1	1	0	0	0	0	A0A2T0KAQ7	na	A0A2T0K7C3	na	na	na	na	na	na	na	A0A2T0KIP3	na	na	na	na
113568	1	1	0	0	0	0	A0A7W7HBN3	na	A0A7W7MIA7	na	na	na	na	na	na	na	na	na	na	na	na
113574	1	3	1	1	1	1	A0A218PNG9	na	A0A218PNS0	A0A218PNQ5	A0A218PNL0	A0A218PNN2	A0A218PM22	A0A218PM27	A0A218PSR4	na	na	na	na	na	na
1135990	2	3	1	1	1	1	A0A1I5V081	A0A1I5WVL3	A0A1I5PWI1	A0A1I5VCE1	A0A1I5VC81	A0A1I5R5X9	A0A1I5NZT4	A0A1I5NZV5	A0A1I5P9Z4	na	na	na	na	na	na
1135996	0	1	0	0	1	0	na	na	A0A6J4JJD7	na	na	na	na	A0A6J4H0C8	na	na	na	na	na	na	na
1135998	1	2	1	0	1	0	A0A6J4JR97	na	A0A6J4IB04	na	A0A6J4HTZ6	A0A6J4HV16	na	A0A6J4HWH9	na	na	na	na	na	na	na
1136135	1	3	1	1	1	1	A0A4R3Q7K6	na	A0A4R3RI04	A0A4R3RXL5	A0A4R3R9X4	A0A4R3QPG5	A0A4R3RJS2	A0A4V2VE26	A0A4R3RV15	na	A0A4R3QTK5	na	na	na	A0A4R3QCZ2
1136177	1	1	0	1	1	0	I9KXY4	na	I9L4H3	na	na	na	I9KZY6	I9AKL5	na	na	I8R8V9	na	I8RCX0	I9L412	na
1136231	1	0	0	0	0	0	H8X951	na	na	na	na	na	na	na	na	na	H8WZY3	na	na	na	na
1136497	1	1	0	1	0	0	A0A1H1X4I1	na	A0A1H1W1X6	na	na	na	A0A1H1XGK6	na	na	na	A0A1H1VNN5	na	na	na	A0A1H1XEX7
113653	0	3	1	1	0	0	na	na	A0A0F7IHK9	A0A0F7IJ27	A0A0F7IF18	A0A7C3ULF9	A0A7C3YHM2	na	na	na	na	A0A7C4S5A5	na	na	A0A0F7IFL8
1136534	1	3	0	0	0	0	J9PV58	na	J9PV91	J9PV61	J9PUC5	na	na	na	na	na	na	na	na	na	na
1136877	1	0	0	0	0	0	A0A828UL74	na	na	na	na	na	na	na	na	na	A0A828UHH1	na	na	na	A0A828UHT9
1136880	1	0	0	0	0	0	A0A9P2Y9F1	na	na	na	na	na	na	na	na	na	A0A9P3DAD0	na	na	na	na
1136941	1	0	0	1	0	0	A0A0N9MSE2	na	na	na	na	na	A0A0N9N049	na	na	na	na	na	na	na	A0A0N9MPB2
1137095	1	3	1	1	1	1	A0A1Z4IMY7	na	A0A1Z4J2D3	A0A1Z4IYY8	A0A1Z4IQK2	A0A1Z4J4T7	A0A1Z4J316	A0A1Z4IQW1	A0A1Z4ISW4	na	A0A1Z4ILM7	na	na	na	na
1137134	1	0	0	1	1	1	S6FR67	na	na	na	na	na	S6FVD8	S6FTR2	na	S6EUM7	na	na	S6F0B3	S6FUH2	na
1137138	1	0	0	1	0	0	A0A067NM80	na	na	na	na	na	A0A067NVH8	na	na	na	A0A067NHJ9	A0A067NER6	na	na	na
1137211	1	0	0	1	1	0	A0A1M3SZU1	na	na	na	na	na	A0A1M3TBU5	A0A1M3SZH3	na	na	A0A1M3TB03	A0A1M3T2R3	na	na	na
1137280	1	3	1	1	1	1	A0A072N743	na	A0A072N3C4	A0A072MYR6	A0A072MXZ3	A0A072N4J9	A0A072N5R9	A0A072N6K0	A0A072N1I7	na	na	na	na	na	na
1137281	1	2	0	1	1	1	A0A3C0F525	na	A0A3C0F8B8	A0A3C0F466	na	na	M7MFX5	M7ND23	A0A3C0F5D9	na	na	na	na	na	na
1137284	1	3	1	1	1	1	A0A0K6IH24	na	A0A0K6IJS8	A0A0K6IK76	A0A0K6IK82	A0A0K6ILD8	A0A0K6IR53	A0A0K6IRT3	A0A0K6IJ56	na	A0A0K6IML6	na	na	na	A0A0K6IR36
1137606	1	3	1	1	1	1	A0A5F2E802	na	A0A5F2EHW0	A0A5F2EG81	A0A5F2EM81	A0A5F2DZF7	A0A5F2EKI5	A0A5F2EKC8	A0A5F2ELC3	na	na	na	na	na	A0A5F2EHM0
1137780	1	2	0	1	1	1	A0A2S7WK10	na	A0A2S7WMH5	A0A2S7WTK1	na	na	A0A2S7WLE9	A0A2S7WPK0	A0A2S7WPE5	na	na	na	na	na	A0A2S7WPJ2
1137799	1	3	1	1	1	2	A0A081NKP1	na	A0A081NL01	A0A081NE17	A0A081NE16	A0A081NG35	A0A081N0Z1	A0A081N0Z2	A0A081NIH4	A0A081NGY4	na	na	na	na	na
1137988	1	0	0	0	1	0	A0A2T0TC08	na	na	na	na	na	na	A0A2T0TRA5	na	na	A0A2T0TPX3	na	na	na	na
1137989	1	0	0	0	1	0	A0A317QFM3	na	na	na	na	na	na	A0A317QFF3	na	na	A0A317QGB6	na	na	na	na
1137991	1	0	0	0	1	0	A0A1G9TPC9	na	na	na	na	na	na	A0A1G9TWL5	na	na	A0A1G9WP66	na	na	na	na
1137993	1	0	0	0	1	0	A0A1H3GHZ9	na	na	na	na	na	na	A0A1H3GPC3	na	na	A0A1H3KW10	na	na	na	na
1137994	1	0	0	0	1	0	A0A239BN04	na	na	na	na	na	na	A0A239IIS5	na	na	A0A239H7V4	na	na	na	na
1138170	1	3	1	1	1	1	A0A1C3XWG7	na	A0A1C3YCB7	A0A1C3YCI7	A0A1C3YCW8	A0A1C3XY03	A0A1C3XWQ5	A0A1C3XWT1	A0A1C3Y0C4	na	A0A1C3XVN1	na	na	na	A0A1C3Y7B9
1138194	1	3	1	1	1	1	A0A7W8XJJ3	na	A0A7W9CYM3	A0A7W9CYT5	A0A7W8XKF9	A0A7W8UJP3	A0A7W8UQ76	A0A7W8UN03	A0A7W8XEC8	na	A0A7W8UJY1	na	na	na	A0A7W9CW44
1138383	1	0	0	0	0	0	A0A7I7TLZ3	na	na	na	na	na	na	na	na	na	A0A7I7TK44	na	na	na	na
1138585	1	0	0	0	0	0	A0A2M9CEE9	na	na	na	na	na	na	na	na	na	na	na	na	na	na
1138822	1	0	0	1	1	0	A0A1S6QKD0	na	na	na	na	na	A0A1S6QKR0	A0A1S6QKT4	na	na	A0A1S6QGH0	na	A0A1S6QJ51	A0A1S6QI15	na
1138871	1	0	0	0	0	0	S4Z551	na	na	na	na	na	na	na	na	na	S4ZKD5	na	na	na	na
1138901	0	0	0	1	1	2	na	na	na	na	na	na	A0A828ZPU7	A0A828ZRR3	A0A828ZTN2	A0A828ZSG5	A0A828ZX21	na	A0A828ZN10	A0A828ZNK1	na
1138915	0	0	0	1	1	2	na	na	na	na	na	na	A0A828ZVP4	A0A828ZZ00	A0A829A414	A0A828ZXT1	A0A829A4S1	na	A0A828ZY46	A0A828ZZC6	na
1138917	0	0	0	1	1	2	na	na	na	na	na	na	A0A829AC69	A0A829A6T5	A0A829A5B4	A0A829A315	A0A829ACQ0	na	A0A828ZX09	A0A829A1A3	na
1139219	0	0	0	1	1	1	na	na	na	na	na	na	S1NA75	S1NJS1	na	S0KUD7	na	na	S0KEK6	S0K6B2	na
1139996	0	0	0	1	1	1	na	na	na	na	na	na	S0NFU0	S0NV07	S0NWU2	na	S0JS55	na	S0NGD9	S0J742	na
114	1	3	1	1	1	1	A0A2Z3H8W2	na	A0A2Z3GZE3	A0A2Z3GZR5	A0A2Z3H2M7	A0A2Z3HLV5	A0A2Z3H869	A0A2Z3HC12	A0A2Z3HB66	na	A0A2Z3GR94	na	na	na	na
1140	1	3	1	1	1	1	Q54769	na	Q54774	Q31NK7	Q31NK6	Q8GJN6	Q8GAA6	Q31KP1	Q31QV7	na	na	na	na	na	na
1140003	0	0	0	1	1	1	na	na	na	na	na	na	S0PBD8	S0PG01	S0L898	na	S0P7H2	na	S0L3R4	S0KM55	na
114090	1	0	0	1	0	0	A0A0R2ILM6	na	na	na	na	na	A0A0R2I6S3	na	na	na	A0A0R2I2G4	na	A0A0R2I6Z0	A0A0R2I7K9	na
1141098	1	0	0	1	0	0	A0A1Y2EIW4	na	na	na	na	na	A0A1Y2DWY5	na	na	na	A0A1Y2DE56	A0A1Y2DCJ3	na	na	na
1141106	2	3	1	1	1	2	A0A380G9P1	A0A380GB90	A0A380G6B8	A0A380GAR2	A0A380G9U0	A0A380GB51	A0A380G8G1	A0A380G730	A0A380G7H4	A0A380G5X6	A0A380G5Z5	na	A0A380G9R6	na	A0A380G6K6
1141221	1	2	0	1	1	1	A0A1G9QS85	na	A0A1G9N0K2	A0A1G9NDR5	na	na	A0A1G9KY72	A0A1G9N0H0	A0A1G9LDB0	na	na	na	na	na	na
114155	1	0	0	1	0	0	A0A4Q9N242	na	na	na	na	na	A0A4Q9N238	na	na	na	A0A4Q9MZT9	A0A4Q9MRM3	na	na	na
1141657	1	0	0	1	0	0	A0A0C1AVS2	na	na	na	na	na	A0A0C1CT10	na	na	na	A0A0C1CPK5	na	na	na	A0A0C1AN79
1141660	1	3	1	1	1	2	K8WCN9	na	K8W0J3	K8W0U6	K8VZD0	K8WJK1	K8W164	K8W7V6	K8WM12	K8W6Z8	K8W6K5	na	na	na	K8WHB1
1141662	1	3	1	1	1	2	K8WP42	na	K8WY57	K8X782	K8W1D6	K8WCD6	K8W1I5	K8W199	K8WY12	K8X1R0	K8VXZ9	na	na	na	K8WS94
1141731	1	3	0	0	1	0	A0A433DQ28	na	A0A433DUK6	A0A433DUL3	A0A433DUJ5	na	na	A0A433E0S8	na	na	na	na	A0A433DR51	na	A0A433DXZ5
1141874	1	0	0	0	0	0	A0A3A9YSF8	na	na	na	na	na	na	na	na	na	na	na	A0A3A9ZCM3	na	A0A3A9YY12
1141878	1	3	1	1	1	1	A0A7W8KBA7	na	A0A7W8KGK5	A0A7W8KGF4	A0A7W8KGC4	A0A7W8KGC5	A0A7W8KIQ3	A0A7W8KF51	A0A7W8KBR8	na	A0A7W8KFG8	na	na	na	A0A7W8NQ79
1141884	1	3	1	1	1	1	A0A4Z0NQB4	na	A0A4Z0NME8	A0A4Z0NLA7	A0A4Z0NH30	A0A4Z0NPQ0	A0A4Z0NG89	A0A4Z0NFC9	A0A4Z0NV34	na	na	na	na	na	na
1141887	1	2	1	1	1	1	A0A2A2SCA8	na	na	A0A2A2SJL7	A0A2A2SK83	A0A2A2SD92	A0A2A2SG89	A0A2A2SG80	A0A2A2SFJ9	na	na	na	na	na	A0A2A2SBC5
1141889	1	3	1	1	1	1	A0A2A4B5T4	na	A0A2A4B6V7	A0A2A4B153	A0A2A4B210	A0A2A4B4S0	A0A2A4B333	A0A2A4B769	A0A2A4B9H0	na	na	na	na	na	A0A2A4B3I7
1141890	1	2	1	1	1	1	A0A285QYC3	na	na	A0A285Q9R3	A0A285QEL3	A0A285QI70	A0A285R749	A0A285R383	na	A0A285R1T9	na	na	na	na	A0A285QDY1
1142394	1	3	1	1	1	1	na	I0IHI4	I0IAH4	I0IBM6	I0IDJ2	I0IDJ3	I0IGY6	I0IDY4	I0ID47	na	I0IF28	na	na	na	na
114249	1	0	1	1	1	1	A0A4R3LJR3	na	na	na	na	A0A4R3LCW5	A0A4R3LDX0	A0A4R3LHZ2	A0A4R3LIW8	na	na	na	na	na	A0A4R3LC75
1142511	1	0	0	0	0	0	H6Q500	na	na	na	na	na	na	na	na	na	na	na	na	na	na
114276	1	1	0	0	0	0	A0A7K5UPA3	na	A0A7K5U5K6	na	na	na	na	na	na	na	na	A0A7K5TW39	na	na	na
1143189	1	0	0	0	0	0	L7I7P9	na	na	na	na	na	na	na	na	na	L7I180	na	na	na	na
1143193	1	0	0	1	0	0	L7JBN3	na	na	na	na	na	L7IU97	na	na	na	L7IU20	L7JN28	na	na	na
114331	1	1	0	0	0	0	A0A7L0ZSR6	na	A0A7L0ZS73	na	na	na	na	na	na	na	na	A0A7L0ZMW3	na	na	na
1143323	0	0	0	1	0	0	na	na	na	na	na	na	A0A173E097	na	na	na	na	na	na	na	A0A173DXY9
114369	0	1	0	0	0	0	na	na	A0A7L0IYV3	na	na	na	na	na	na	na	na	A0A7L0J4M5	na	na	na
1143690	1	1	0	1	0	0	A0A1A8F4D4	na	A0A1A8H0U6	na	na	na	A0A1A8G2A3	na	na	na	na	A0A1A8F996	na	na	na
114398	1	0	0	1	0	0	A0A2L2XZP6	na	na	na	na	na	A0A2L2YCI8	na	na	na	na	na	na	na	na
114404	1	2	1	1	1	1	A0A2T4HUI1	na	na	A0A2T4HQ22	A0A2T4HQ09	A0A2T4HT89	A0A2T4HPC2	A0A2T4HPU0	A0A2T4I087	na	na	na	na	na	A0A2T4HJV6
1144253	1	2	0	1	1	1	J1FGU0	na	J0LAY7	J1FFU8	na	na	J0LCV0	J0LQM0	J0LGV6	na	na	na	na	na	J0LIP4
1144275	1	3	1	1	1	1	H8MRE0	na	H8MTT2	H8N156	H8MFS8	H8N2D5	H8MKW8	H8MU07	H8MT39	na	na	na	na	na	H8MMR6
1144300	0	0	0	0	0	0	na	na	na	na	na	na	na	na	na	na	H4GI98	na	H4GHU5	na	na
1144304	1	3	1	1	1	1	J2GN66	na	J3AGU6	J2GLF2	J3AF91	J2ZZH8	J2ZWC9	J2GK80	J3AEB9	na	J2G1A4	na	na	na	na
1144305	1	2	1	1	1	1	J2GYG2	na	na	J2GEH9	J2FX33	J3A2D0	J2GJF0	J3ADC8	J2PBQ9	na	J2GF38	na	na	na	J2P5V6
1144307	1	2	1	1	1	1	J2WLS8	na	na	J2D908	J2KVJ1	J2CZD0	J2LGX3	J2D132	J2KZ66	na	J2D8G5	na	na	na	J2L2C5
1144308	1	3	1	1	1	1	J3AJF9	na	J2FTE2	J2ZMR5	J2ZM73	J2GD95	J2GM00	J2GSC7	J2ZUU0	na	J2FZ63	na	J2ZM95	J3AA16	J2P9U7
1144310	1	2	1	1	1	1	W6VV79	na	W6WIZ2	na	W6W1K7	W6W7N3	W6VVE9	W6VX79	W6WUA0	na	W6W182	na	na	na	W6W2V1
1144311	1	3	1	0	1	1	J3B082	na	J2QQD6	J2I152	J3B167	J3B2F8	na	J3B408	J2HQX0	na	J2QKE1	na	na	na	J3B4V6
1144312	1	3	1	1	1	1	J2RPS6	na	J2RI05	J2IUM7	J3BIY3	J2J846	J2IEF7	J3BMD7	J3BI95	na	J3BDW8	na	na	na	J3BTX2
1144313	1	2	0	1	1	1	J3BW52	na	J2JVG1	J3BX02	na	na	J3C3U0	J2S351	J2SBG9	na	na	na	na	na	J2J3H7
1144314	1	3	1	1	1	1	J2L7U6	na	J2AVK8	J2L366	J1T716	J2KYX1	J2LF22	J1T2A2	J2LC21	na	J1T1H6	na	na	na	J2L1E0
1144315	1	3	1	1	1	1	J2JRW3	na	J2SWD2	J2K9M7	J3CRH0	J2KYK9	J2KZE8	J3CTT8	J3CGN1	na	J2K8Y2	na	na	na	na
1144316	1	2	0	1	1	1	J3CQA8	na	J3CMQ0	J3CKX3	na	na	J2T5G3	J3CCC0	J2KMZ6	na	na	na	na	na	na
1144317	1	3	1	1	1	1	J0KL76	na	J1EH81	J0KDB8	J1E9V4	J1ERN4	J1EQ70	J0U2I0	J1EAD4	na	na	na	na	na	J1EER3
1144318	1	3	1	1	1	1	J2LGZ6	na	J3CZ64	J2KMY9	J2LUX9	J2U2D0	J3D2X2	J2KU56	J2TTT0	na	na	na	na	na	na
1144319	1	3	1	1	1	1	J2LED0	na	J3DHF5	J2LIM7	J2L8S0	J2L4K5	J2M2H2	J3DH85	J2LKA4	na	J2LKI5	na	na	na	na
1144320	1	3	1	1	1	2	J2UDM3	na	J2TST0	J3D033	J3DFV2	J2KUZ4	J2M0D6	J3DFX7	J2LDA8	J2LJD2	J3DGP2	na	na	na	J2KXQ1
1144321	2	3	1	1	1	1	J2MPF3	J3E5J4	J3DJU2	J2MK16	J3DTD6	J2MI58	J3DS73	J2LZX1	J2MLV2	na	J2MCQ7	na	na	na	na
1144324	2	3	1	1	1	1	J3EBM5	J2PBY3	J2X157	J2NSP0	J3EWX2	J2PAI8	J2WZF6	J3EYL9	J2NUZ6	na	J3EJ39	na	na	na	J2NKQ0
1144325	2	3	1	1	1	1	J2NUZ4	J2X673	J3EWL4	J2VZZ7	J2NGC0	J2P0T6	J2N7B9	J3EJA2	J3EUS7	na	J2NCC7	na	na	na	J2NUI8
1144326	2	3	1	1	1	1	J2QD40	J2YQX3	J3FM43	J3FCF3	J2PI01	J3FBJ4	J3FID4	J2QH13	J3FSI5	na	J3FN49	na	na	na	J2YG57
1144327	2	3	1	1	1	1	J2PQ81	J2PX51	J3F769	J2PP60	J3FE57	J2XQA9	J2PRH2	J3F625	J3FF07	na	J2P919	na	na	na	na
1144328	2	3	1	1	1	1	W6VIV5	W6VN37	W6VRG9	W6VPB0	W6VW91	W6W846	W6VQF3	W6W7T2	W6VTM0	na	W6VXF8	na	na	na	na
1144329	2	3	1	1	1	1	J2QJG9	J3FX98	J2QW15	J2YDD2	J2YPD0	J2Q454	J3FGV0	J2QDH3	J2QPA4	na	J2QXL4	na	na	na	J2R1Y6
1144330	2	3	1	1	1	1	J2S6J8	J3G4P6	J3G143	J3GEH4	J3A9P4	J2SE40	J3GDG8	J2S249	J3A4J1	na	J3FXZ4	na	na	na	na
1144331	2	3	1	1	1	1	J2TQA1	J3GG03	J2SVG7	J2SSS8	J3GMC4	J2RYE4	J3GFD2	J2S8T9	J3GQI3	na	J3GUU1	na	na	na	na
1144332	2	3	1	1	1	1	J2SV57	J2SMA1	J3GGA0	J3ATH6	J2TAD1	J3GLZ7	J2S1J2	J3GCU2	J3GIV3	na	J3AA25	na	na	na	J2SI90
1144333	2	3	0	1	1	1	J2SEB6	J3AYT1	J2T2X5	J3GRM9	J3AW81	na	J3GP61	J2T985	J2T9H8	na	J2TRZ3	na	na	na	na
1144335	2	3	1	1	1	1	J2UXA9	J3H558	J3BQZ1	J3HBD5	J2UT28	J2UWJ7	J3GWW9	J2TCK5	J2U4F7	na	J3HCQ1	na	na	na	na
1144336	2	3	1	1	1	1	J2V1M2	J2UV66	J3HCL7	J3HGE9	J2UP10	J2TQS3	J3BCF5	J2U6D3	J3BXE5	na	J3BYP8	na	na	na	na
1144337	2	3	1	1	1	1	J2XH10	J3I9N3	J2XK42	J3ISX1	J2XJZ6	J2X3T6	J3ILT2	J2XFD5	J3IAG9	na	J2Y044	na	na	na	J3INC6
1144338	2	3	1	1	1	1	J3I6V2	J2WP68	J3IER4	J3IBT8	J2WRA2	J2XH05	J2X9Y1	J3D986	J3DH72	na	J3I7G8	na	na	na	J3DDW0
1144339	2	3	1	1	1	1	J3IFB3	J2XTU5	J2WCD7	J3DTE3	J2Y810	J3I8Q8	J2X235	J3IGE2	J3DXJ9	na	J2XUS6	na	na	na	na
1144340	2	3	1	1	1	1	J3E353	J2YRI3	J2YTG1	J3IY78	J2Y8F0	J3IR55	J2YR28	J3IWU1	J3IVG8	na	J3IP35	na	na	na	na
1144341	1	3	1	1	1	2	J3C5S1	na	J3HME1	J2VIF2	J3HN75	J3HT55	A0A9X0DYH3	J2V573	J2VMC4	J3HST2	J3HGW2	na	na	na	J3HBL5
1144342	1	3	1	1	1	1	J2W9L6	na	J3CD30	J2VSX9	J3CGR8	J2VKV8	J3HQR8	J3CC32	J3HL43	na	J2V7J7	na	na	na	J3CKY6
1144343	1	3	1	1	1	1	J3HSV9	na	J2V8P8	J3C715	J3CIW3	J3HM47	J3HT89	J2VFW3	J3HMR4	na	J3HMT7	na	na	na	J2V127
1144344	1	2	1	1	1	1	J3I3G5	na	J3I164	na	J3I3T9	J3I3L0	J3I4Y4	J3I4Y6	J3CK71	na	na	na	na	na	na
1144522	0	0	0	1	0	0	na	na	na	na	na	na	A0A1J4K4G5	na	na	na	A0A1J4KPY1	A0A1J4K619	na	na	na
1144548	1	1	0	0	0	0	A0A1H7DF36	na	A0A1H6UKD5	na	na	na	na	na	na	na	na	na	A0A1H6V818	na	na
1144553	2	3	0	0	1	0	A0A1H5T0B3	A0A1H6EZ45	A0A1H5T0K2	A0A1H5T033	A0A1H6EYW3	na	na	A0A1H6CQ64	na	na	A0A1H5W071	na	na	na	na
1144618	1	3	0	0	0	0	A0A2T0Q224	na	A0A2T0Q295	A0A2T0Q2J1	A0A2T0Q2J6	na	na	na	na	na	A0A2T0Q898	na	na	na	A0A2T0PP63
1144661	1	3	1	1	1	1	N9M0G2	na	N9LWY4	N9NDQ1	N9N3E2	N9NBA0	N9N9R2	N9LT71	N9LWV0	na	na	na	na	na	na
1144662	1	3	1	1	1	2	N9P6N8	na	N9QL52	N9NZR9	N9NZB9	N9NZ69	N9Q888	N9QH34	N9QL90	N9QH30	na	na	na	na	na
1144663	1	3	1	1	1	1	N8WPL8	na	N8VA88	N8WNA9	N8VA08	N8V9F1	N8V778	N8WL83	N8WN26	na	na	na	na	na	na
1144664	1	3	1	1	1	1	N8VRM3	na	N8VTP1	N8UE45	N8VRH7	N8VSE3	N8UDC7	N8VL13	N8VNB8	na	na	na	na	na	na
1144665	1	3	1	1	1	2	N9NJV6	na	N9NF38	N9PVG6	N9NCT3	N9PQ82	N9NCK1	N9NCG5	N9NFL7	N9PUA6	na	na	na	na	na
1144666	1	3	1	1	1	1	N9TMS7	na	N9RZU1	N9TFV3	N9RWZ0	N9T6V4	N9TBF6	N9RSL5	N9TKI1	na	na	na	na	na	na
1144667	1	3	1	1	1	1	N8UAU1	na	N8VIU8	N8VIG0	N8U5P7	N8U591	N8VK48	N8VL55	N8VIM0	na	na	na	na	na	na
1144668	1	3	1	1	1	1	N8W018	na	N8VX91	N8UND9	N8W119	N8UNU7	N8ULQ4	N8VZC4	N8W2Y8	na	na	na	na	na	na
1144669	1	3	1	1	1	1	N8XBG7	na	N8X9Q8	N8XEE7	N8X9J4	N8XA14	N8VYK5	N8X6U3	N8XF51	na	na	na	na	na	na
1144670	1	3	1	1	1	1	N9PLK9	na	N9P839	N9MYY5	N9PIH0	N9MYU6	N9PJI7	N9P9S7	N9MYK1	na	na	na	na	na	na
1144671	1	3	1	1	1	1	N9MB17	na	N9L385	N9MKE6	N9L297	N9MIA0	N9KXS4	N9KXY7	N9L320	na	na	na	na	na	na
1144672	1	3	1	1	1	2	N8XLC1	na	N8XH50	N8XIQ7	N8XN86	N8XMX0	N8XPT1	N8WG69	N8W740	N8XLJ7	na	na	na	na	na
1144673	1	3	1	1	1	2	N9P7A0	na	N9QLE0	N9PDQ0	N9QZB8	N9PDL5	N9QXD7	N9QLW8	N9PBG9	N9PG24	na	na	na	na	na
1144674	1	3	1	1	1	2	N8Q4I6	na	N8NRU9	N8NSX4	N8NSA3	N8NST2	N8Q7V0	N8Q7V6	N8Q7E1	N8NKG9	na	na	na	na	na
1144680	1	3	1	1	1	1	na	A0A934R2T7	A0A934R6N7	A0A934V7V0	A0A934R6Y5	A0A934R8D9	A0A934QZF4	A0A934V9S7	A0A934VBE3	na	na	na	na	na	na
1144708	2	3	1	1	1	1	W6UW55	W6VJN8	W6VGQ4	W6UX62	W6V2R3	W6V6S2	W6V3P7	W6UY91	W6VUW6	na	W6V716	na	na	na	na
1144748	1	3	1	1	1	1	A0A1B3B9S3	na	A0A1B3B9R8	A0A1B3BBY5	A0A1B3BBY1	A0A1B3BC93	A0A1B3BB26	A0A1B3BB27	na	A0A1B3BB47	na	na	na	na	na
1144750	1	3	0	1	1	1	A0A1I3QMP2	na	A0A1I3JBU7	A0A1I3RKE1	A0A1I3MRU8	na	A0A1I3NTS2	A0A1I3L5S1	A0A1I3IM36	na	na	na	na	na	A0A1I3SH95
1144873	1	3	1	1	1	1	A0A4R7AYV9	na	A0A4R7B026	A0A4R7B1R1	A0A4R7AZA1	A0A4R7BCQ9	A0A4R7B5Y3	A0A4R7AZ48	A0A4R7AX24	na	A0A4R7B3A7	na	na	na	na
1145106	1	2	0	1	1	1	A0A420AMA2	na	A0A420AMB5	A0A420BJ61	na	na	A0A420AJB5	A0A420BJ67	na	A0A420AJA3	na	na	na	na	na
1145110	1	3	1	1	1	1	K2J9A7	na	K2KQJ0	K2J9B0	K2KRQ3	K2J6J9	K2K2W0	K2K060	na	K2JES4	na	na	na	na	na
1145111	1	3	1	1	1	1	K2KUV0	na	K2KFH1	K2KUV4	K2K558	K2JZ20	K2JG58	K2JGE8	na	K2K6E3	na	na	na	na	na
1145112	1	3	1	1	1	1	K2KBG1	na	K2JKF4	K2KBG8	K2KUQ0	K2KHE3	K2KEY6	K2JSL7	na	K2LAD8	na	na	na	na	na
1145113	1	3	1	1	1	1	K2L805	na	K2KTZ0	K2L812	K2JQ07	K2K9V8	K2KN83	K2KNJ4	na	K2JWM8	na	na	na	na	na
1145114	1	3	1	1	1	1	K2L209	na	K2KLB4	K2L213	K2KTI7	K2KU43	K2LKD2	K2L749	na	K2KZN2	na	na	na	na	na
1145115	1	3	1	1	1	1	K2LK01	na	K2L6M7	K2LK08	K2L9J8	K2LEL4	K2LR52	K2KX31	na	K2LE18	na	na	na	na	na
1145116	1	3	1	1	1	1	K2L074	na	K2K8M0	K2L082	K2LLP3	K2KQG3	K2KU24	K2KXR7	na	K2KXN6	na	na	na	na	na
1145117	1	3	1	1	1	1	K2L0T7	na	K2L4R6	K2L0U1	K2L7H9	K2LDL1	K2M0B7	K2KG77	na	K2KIN3	na	na	na	na	na
1145118	1	3	1	1	1	1	K2KE92	na	K2LV80	K2KE94	K2L610	K2L6R0	K2LJM1	K2KHW5	na	K2LAD2	na	na	na	na	na
114527	1	0	0	1	1	1	A0A2S0L3A5	na	na	na	na	na	A0A2S0L324	A0A2S0L346	na	A0A2S0L3I3	na	na	A0A2S0L2M9	na	A0A2S0L2J0
1145276	1	0	0	1	1	1	A0A806LIY2	na	na	na	na	na	A0A806LRH8	A0A806LLT2	A0A806LXT1	na	na	na	A0A806LJ02	A0A806LJ84	na
114529	0	3	0	0	0	0	na	na	A0A6C0UT53	A0A6C0UY81	A0A6C0V0I4	na	na	na	na	na	na	na	na	na	A0A6C0UN16
114615	1	3	1	1	1	1	A4YRA5	na	A4YPK9	A4YPL0	A4YUN8	A4YVC1	A4YV16	A4YV19	A4YJM4	na	na	na	na	na	na
114683	1	1	0	0	0	1	A0A931NST0	na	A0A931JGC9	na	na	na	na	na	na	A0A931JR54	A0A931NL47	na	A0A931JBJ5	na	na
114686	1	1	0	0	1	0	A0A1V6MKL6	na	A0A1V6MUV8	na	na	na	na	A0A1V6MQ19	na	na	A0A1V6MLM0	na	na	na	na
1146883	1	0	0	0	0	0	H6RPW4	na	na	na	na	na	na	na	na	na	H6RK69	na	na	na	na
114699	1	1	0	0	0	0	A0A6G4AWX6	na	A0A6G4AV23	na	na	na	na	na	na	na	A0A6G4ARW7	na	A0A6G4AKY9	na	na
1147	1	3	1	1	1	1	A0A068MVU6	na	A0A068MYR2	A0A068MS08	A0A068MSX2	A0A068MSS9	A0A068MS13	A0A068MSH7	A0A068MYU0	na	na	na	na	na	na
1147111	1	0	0	1	0	0	A0A430LX82	na	na	na	na	na	A0A430LLL7	na	na	na	A0A430L2P5	A0A430L6V2	na	na	na
1147123	1	3	0	1	1	1	na	A0A1T4YEU6	A0A1T4YES9	A0A1T4YGC5	A0A1T4XSG9	na	A0A1T4WUJ4	A0A1T4WUL9	A0A1T4XW23	na	na	na	A0A1T4WEG5	A0A1T4WWH9	na
1147128	0	0	0	1	0	0	na	na	na	na	na	na	K4IJG0	na	na	na	K4IKC9	na	K4ISQ8	na	na
1147131	0	0	0	1	0	0	na	na	na	na	na	na	A0AA36K9W9	na	na	na	na	na	na	na	na
114742	1	1	0	0	0	0	A0A2D4BP91	na	A0A2D4BT60	na	na	na	na	na	na	na	na	na	na	na	na
1147741	1	1	0	1	0	0	A0A0R3RK29	na	A0A0R3RS29	na	na	na	A0A0R3S359	na	na	na	na	A0A0R3S012	na	na	na
1147786	2	3	1	1	1	1	A0A024E3M4	A0A024EDA6	A0A024E678	A0A024EG93	A0A024EHA8	A0A024EJS3	A0A024EGM5	A0A024EFK5	A0A024ECD5	na	A0A024EIY9	na	na	na	na
114810	0	0	0	1	0	0	na	na	na	na	na	na	A0A9W8NDA4	na	na	na	na	A0A9W8NHQ4	na	na	na
1148157	1	3	1	1	1	2	A0A0B2UAZ1	na	A0A0B2UF64	A0A0B2UAG8	A0A0B2UAY8	A0A0B2U809	A0A0B2UCX5	A0A0B2UC28	A0A2T5QMH2	A0A0B2UFN5	na	na	na	na	na
114847	1	0	0	0	0	0	na	B3VUL4	na	na	na	na	na	na	na	na	na	na	na	na	na
1148509	2	3	1	1	1	1	A0A1H1PUK3	A0A1H1WCT7	A0A1H2AVM8	A0A1H1ZXI4	A0A1H1ZYD3	A0A1H1P8H1	A0A1H1ZGS0	A0A1H1ZGI6	A0A1H1U9S7	na	A0A1H2B0N2	na	na	na	A0A1H1UN37
114890	1	1	0	1	0	0	A0A1I8D4M5	na	A0A1I8CW98	na	na	na	A0A1I8C2N9	na	na	na	na	A0A1I8CRP5	na	na	na
1149133	2	3	1	1	1	1	L8MJN8	L8MTQ8	L8MQA6	L8MFH4	L8MEI9	L8MM50	L8MC43	L8MCU7	L8MKN6	na	na	na	na	na	L8MFN7
1149755	1	0	0	1	0	0	A0A2J6RFJ0	na	na	na	na	na	A0A2J6RC91	na	na	na	A0A2J6QYE0	A0A2J6R9K6	na	na	na
1149773	1	3	1	1	1	1	A0A2P7AV30	na	A0A2P7ASF7	A0A2P7ASL1	A0A2P7ASH4	A0A2P7AZ40	A0A2P7AX90	A0A2P7AVU3	A0A2P7AZG6	na	A0A2P7AZD4	na	na	na	A0A2P7ALH6
1149862	1	3	0	1	1	1	na	I9B035	I8RJC1	I9LCU2	I9LDT2	na	I8RFR9	I9AZT4	I8RHF3	na	na	na	I9AWV0	I9LAZ6	na
1149953	1	3	1	1	1	1	A0A1M4LAJ4	na	A0A1M4LDU6	A0A1M4LDF8	A0A1M4LDL9	A0A1M4LBA1	A0A1M4LAK0	A0A1M4L9W8	A0A1M4LHB4	na	A0A1M4LHS3	na	na	na	A0A1M4LDJ0
1150112	1	2	0	1	1	0	A0A1I3LED1	na	A0A1I3NDL7	A0A1I3SVS9	na	na	A0A1I3QSM7	A0A1I3SU39	na	na	na	na	na	na	na
1150298	0	0	0	1	1	1	na	na	na	na	na	na	A0A174IBW5	A0A174H0U6	na	A0A174IUW6	A0A173YFU6	na	A0A174B7T8	na	na
1150368	1	2	0	1	1	1	A0A1K1RT79	na	A0A1K1N4X7	A0A1K1NLY4	na	na	A0A1K1LX92	A0A1K1R632	A0A1K1R971	na	na	na	na	na	A0A1K1QSS2
1150389	1	2	0	1	1	1	A0A1J0LME9	na	A0A1J0LKP6	A0A1J0LLA9	na	na	A0A1J0LQ26	A0A1J0LNX7	A0A1J0LQC2	na	na	na	na	na	A0A1J0LLZ6
1150400	1	3	1	1	1	1	A0A1H1ACS3	na	A0A1H1A463	A0A1H1A526	A0A1H1A4C8	A0A1H0ZXK4	A0A1H0Y521	A0A1H1A5Z5	A0A1H1EKH6	na	A0A1H1DL70	na	na	na	na
1150460	1	0	0	0	0	0	A0A087B7F0	na	na	na	na	na	na	na	na	na	A0A087B0L9	na	na	na	na
1150469	1	0	0	1	1	1	H6SSA0	na	na	na	na	na	H6SN68	H6SQS3	H6SN67	na	na	na	na	na	H6SQA0
1150591	1	0	0	0	1	0	I0RME0	na	na	na	na	na	na	I0RNJ5	na	na	I0S0X9	na	na	na	na
1150600	1	2	0	1	1	1	R9GRU5	na	R9GSA6	R9H2E1	na	na	R9GSV7	R9GUZ8	R9GW83	na	na	na	na	na	R9H3C5
1150625	1	1	0	1	1	1	A0A147K8R0	na	na	A0A147K8T1	na	na	A0A147K6Y1	A0A147K719	A0A147KBE2	na	A0A147KA56	na	A0A147K826	na	A0A147K8K7
1150626	1	3	1	1	1	1	H8FTK6	na	H8FNB2	H8FNB1	H8FMX5	H8FQJ0	H8FU18	H8FU19	H8FQI9	na	na	na	na	na	na
1150837	1	0	0	1	0	0	A0A6A5RQ37	na	na	na	na	na	A0A6A5R4C5	na	na	na	A0A6A5RB24	A0A6A5RRF6	na	na	na
1150864	1	3	0	0	0	0	I0L1T3	na	I0L1T7	I0L1T8	I0L1T4	na	na	na	na	na	na	na	na	na	na
1151	1	3	1	1	1	1	A0A976BYL1	na	A0A976ETS5	A0A976BXW2	A0A976CKE3	A0A976GMQ9	A0A976ETG8	A0A976C3U5	A0A976EZ46	na	A0A976F1Q2	na	na	na	na
1151001	1	3	1	1	1	1	A0A5I4K452	na	A0A5I4K006	A0A5H6JI01	A0A5J0RNC2	A0A5H6J9Z4	A0A5H6JBE3	A0A5H6KL77	A0A5J2K807	na	A0A5H6KKH3	na	A0A5H8J9X3	na	A0A5H6KCF3
1151002	1	3	1	1	1	1	A0A5H7W2Y0	na	A0A5H9M6X3	A0A5J1INQ4	A0A5J1IVU0	A0A5J1IJU7	A0A607ID04	A0A5H9M1P7	A0A5I4DJP1	na	A0A5J1IGA0	na	A0A5H9T1F0	na	A0A5H9TB75
1151116	1	3	1	0	1	2	H8NRN9	na	H8NR47	H8NR46	H8NYK2	H8NMN8	na	H8NYP0	H8NSD2	H8NTZ3	H8NSS6	na	na	na	H8NUD5
1151166	1	3	1	1	1	1	A0A741MZW8	na	A0A741SIT4	A0A741SK75	A0A741MTS6	A0A741MV60	A0A741SIR0	A0A741SH58	A0A741SGZ1	na	A0A741MYE5	na	A0A741N038	na	A0A741SI99
1151170	1	3	1	1	1	1	A0A729PX99	na	A0A729PYF4	A0A701Y231	A0A729JTA5	A0A729JT90	A0A701V7K0	A0A701UZC9	A0A729PXB6	na	A0A701UV37	na	A0A701V483	na	A0A729PX16
1151173	1	3	1	1	1	1	A0A3V4SMA4	na	A0A3V4SJZ5	A0A3V4SK08	A0A3V4SN09	A0A3V4SJZ3	A0A3V4SN75	A0A3V4SGQ4	A0A3V4SIH5	na	A0A3V4SHM5	na	A0A3V4SJL2	na	A0A3V4SM21
1151180	1	3	1	1	1	1	A0A5I0MGX9	na	A0A5I6PKV1	A0A5I9F137	A0A5I6PLW1	A0A5I6PJE4	A0A5I6R462	A0A5I6R1N0	A0A5I0MEJ6	na	A0A5I0MNZ1	na	A0A5I6R5Y7	na	A0A5I9EY18
1151742	0	0	0	1	0	0	na	na	na	na	na	na	A0AA45QRI2	na	na	na	na	na	A0AA45KEW1	na	na
1151754	1	0	0	0	0	0	M9LWN7	na	na	na	na	na	na	na	na	na	M9LUE2	M9M1V0	na	na	na
1153	1	3	1	1	1	1	A0A2W6Z1Q0	na	A0A2W6YZ12	A0A2W6Z5N2	A0A2W6ZLI7	A0A2W6ZGR9	A0A2W6Z5A5	A0A2W6YTJ1	A0A2W6YW35	na	na	na	na	na	na
115433	1	1	0	0	0	0	A0A1I4C9D7	na	A0A1I3KBR8	na	na	na	na	na	na	na	A0A1I3K5Z0	na	na	na	na
1154756	2	3	1	1	1	2	A0A1B1KNJ6	A0A1B1KRY6	A0A1B1KL84	A0A1B1KL91	A0A1B1KM18	A0A1B1KVF9	A0A1B1KLX7	A0A1B1KLZ9	A0A1B1KK66	A0A1B1KS41	A0A1B1KMK6	na	na	na	A0A1B1KJS8
1154776	1	0	0	1	1	2	A0A829I8H9	na	na	na	na	na	A0A829I7U7	A0A829ICV5	A0A829IFE7	A0A829IH82	A0A829IEK2	na	A0A829ICR8	A0A829IEK0	na
1154860	1	0	0	1	1	1	V6Z483	na	na	na	na	na	V6Z2H4	V6Z0I4	V6Z0B6	na	na	na	V6Z0V9	V6Z5F8	na
1155084	1	3	1	0	1	2	na	A0A0E0VMC4	A0A0E0VM97	A0A0E0VNE5	A0A0E0VNT0	A0A0E0VNV0	na	A0A0E0VQD8	A0A0E0VQZ7	A0A0E0VS78	A0A0E0VM64	na	na	A0A0E0VSQ1	A0A0E0VQ81
1155096	0	0	0	1	1	0	na	na	na	na	na	na	I0FDP7	I0FBF0	na	na	na	na	na	na	I0FBH6
1155384	1	0	0	1	0	0	A0A5C2FH96	na	na	na	na	na	A0A5C2FHL1	na	na	na	A0A5C2FI09	na	na	na	A0A5C2FML0
115547	1	3	0	1	1	2	A0A5E4HH32	na	A0A0D5ZFS6	A0A0D5ZIS2	A0A1S6GZT7	na	A0A1S6GYK5	A0A0D5ZEB3	A0A5E4I7J4	A0A1S6GYK9	A0A5E4JMB1	A0A5E4JJW5	A0A5E4IT83	A0A5E4HZK4	A0A5E4IXJ0
115553	1	3	1	1	1	1	A0A365TTB8	na	A0A365TKT0	A0A365TPC6	A0A365TNL1	A0A365TIU1	A0A365TRI6	A0A365TRI2	A0A365TWM6	na	na	na	na	na	A0A365TMG2
115555	1	2	1	0	1	1	A0A510J6J5	na	A0A455VDV7	na	A0A455V5Q4	A0A455V933	na	A0A455VKA0	A0A455V442	na	na	na	na	na	A0A455V6P9
115561	2	3	1	1	1	1	A0A6F8U5A9	A0A6F8U832	A0A6F8U3R0	A0A6F8U2V4	A0A6F8U4F5	A0A6F8U248	A0A6F8U0Q4	A0A6F8TZY2	A0A6F8U5C2	na	na	na	na	na	A0A6F8U356
1155617	1	3	1	1	1	2	A0A2S9Y9G3	na	A0A2S9Y960	A0A2S9Y8Y7	A0A2S9Y8Y8	A0A2S9Y8X2	A0A2S9Y4T8	A0A2S9Y4U5	A0A2S9XIJ0	A0A2S9XQN9	A0A2S9XUS9	na	A0A2S9Y1Q9	A0A2S9Y9M2	na
1155689	1	2	0	1	1	1	A0A1M4W8W6	na	A0A1M4TTL8	A0A1M4U1C1	na	na	A0A1M4WYY1	A0A1M4SJK7	A0A1M4WMR5	na	na	na	na	na	A0A1M4TFP3
1155722	1	3	1	1	1	1	na	A0A1M7FF68	A0A1M7C665	A0A1M7F508	A0A1M7F4B5	A0A1M7F416	A0A1M7ISX9	A0A1M7CWZ2	A0A1M7B6J0	na	na	na	na	na	na
1155777	1	3	0	1	1	1	I2C731	na	I2C497	I2C498	I2C496	na	I2C8F3	I2C8F4	I2C2U2	na	na	na	I2C760	na	I2C6P4
1155944	1	3	1	1	1	1	A0A1I6TYJ7	na	A0A1I6R7M6	A0A1I6SML0	A0A1I6SMK9	A0A1I6SVH2	A0A1I6R1Z7	A0A1I6R1T4	A0A1I6T0P5	na	A0A1I6T115	na	A0A1I6U8E2	A0A1I6RIG5	na
115618	1	1	0	0	0	0	A0A7K4S5C1	na	A0A7K4S941	na	na	na	na	na	na	na	na	A0A7K4SC76	na	na	na
1156355	1	3	1	1	1	1	A0A3D9SB83	na	A0A3D9RWR0	A0A3D9S2M4	A0A3D9S778	A0A3D9Q646	A0A3D9QVT4	A0A3D9QXE6	A0A3D9SB69	na	A0A3D9Q6F8	na	na	na	na
1156394	1	1	0	1	1	1	T0RL84	na	T0Q6U0	na	na	na	T0QCM8	T0Q7Y9	na	T0Q9R1	T0QUJ3	T0Q6C1	na	na	na
1156395	1	3	1	1	1	1	na	A0A1B9F3K6	A0A1B9F7P7	A0A1B9F7C0	A0A1B9F8H0	A0A1B9F8C9	A0A1B9F9F7	A0A1B9F3U3	na	A0A1B9F378	na	na	na	na	na
1156417	1	3	0	1	1	1	A0A096BFV6	na	A0A096BKW3	A0A096DQJ8	A0A096BJV7	na	A0A096BK22	A0A096DQR6	A0A096DM22	na	na	na	A0A096BEK8	A0A096BL03	na
1156431	1	0	0	1	1	1	A0A3E4YE01	na	na	na	na	na	U5P6B5	U5P319	A0A3E4YJE4	na	na	na	A0A3E4YGI9	U5P8D9	na
1156935	1	1	1	1	1	1	K2Q078	na	K2QEN2	na	na	K2Q8I4	K2QA89	K2QSD4	K2PHU7	na	K2PA98	na	na	na	K2PKG5
1156937	1	2	0	1	1	1	na	I0K1J1	I0JYI7	I0JYJ2	na	na	I0JZ35	I0JZH3	na	I0JWZ1	na	na	na	na	na
1156940	1	3	1	0	1	2	H8FJU1	na	H8FCV1	H8FAS3	H8FAS2	H8FDF5	na	H8FKF8	H8FFE7	H8FJE1	H8FCM9	na	na	na	H8FBS9
1156985	1	3	1	1	1	1	na	A0A1G5PVN8	A0A1G5PIT0	A0A1G5PJN5	A0A1G5PJM2	A0A1G5PJ31	A0A1G5QMZ2	A0A1G5RCY4	A0A1G5QW56	na	A0A1G5QSJ7	na	na	na	na
1157475	0	0	0	1	1	2	na	na	na	na	na	na	A0A829FEJ0	A0A829EZJ5	A0A829FBV3	A0A829F0R3	A0A829EX51	na	A0A829EV75	A0A829FAQ3	na
1157487	0	0	0	1	1	2	na	na	na	na	na	na	A0A829FMB3	A0A829F7I7	A0A829FJ20	A0A829FFF7	A0A829FCV8	na	A0A829F7S8	A0A829FFG8	na
1157490	1	3	1	1	1	0	A0A074MF83	na	A0A074LM26	A0A074LNU4	A0A074LJ05	A0A074LT01	A0A074M8D6	A0A074LR03	na	na	A0A074LRL8	na	na	na	na
1157616	1	0	0	1	0	0	A0A1Z5STD8	na	na	na	na	na	A0A1Z5TN90	na	na	na	A0A1Z5SN30	A0A1Z5SL58	na	na	na
1157630	1	0	0	0	1	0	A0A1C6NI88	na	na	na	na	na	na	A0A1C6PUZ2	na	na	na	na	A0A1C6PSF2	na	na
1157641	1	0	0	0	1	0	A0A212SSA8	na	na	na	na	na	na	A0A212SAK4	na	na	na	na	A0A212SHE7	na	na
115778	0	0	0	1	1	0	na	na	na	na	na	na	A0A9Q3SZ63	A0A9Q3SZ86	na	na	A0A9Q3SV32	na	A0A9Q3SWQ5	A0A9Q3SZH8	na
115781	1	2	1	1	1	1	na	A0A931G8H0	A0A931CXJ3	A0A931CWQ1	na	A0A931CVD4	A0A931CYS2	A0A931G904	na	A0A931CQL5	na	na	na	na	na
115783	1	3	1	1	1	1	na	A0A1T4RG03	A0A1T4QNE5	A0A1T4QNJ9	A0A1T4PPZ9	A0A1T4Q844	A0A1T4RPT7	A0A1T4RQ72	na	A0A1T4PXA2	na	na	na	na	na
1157946	1	3	1	1	1	1	I0QK73	na	I0QGM3	I0QGM2	I0QGM4	I0QGM1	I0QII7	I0QHT2	I0QGQ6	na	na	na	I0QGP6	I0QK83	na
1157951	1	3	1	1	1	1	A0A140NQA6	na	A0A140NLJ1	A0A140NK61	A0A140NIB3	A0A140NMX7	A0A140NK59	A0A140NHN4	A0A140NQJ2	na	A0A140NKI9	na	na	na	A0A140NLC0
1157962	1	1	0	1	0	0	A0A250X4T3	na	A0A250X5A9	na	na	na	A0A250XBX4	na	na	na	A0A250WQC1	A0A250XD84	na	na	na
1158056	1	1	0	0	0	0	A0A014MKR0	na	A0A014LG55	na	na	na	na	na	na	na	na	na	A0A014N6V8	na	na
115808	1	3	1	1	1	1	A0A1Y6KFV8	na	A0A1Y6KNF4	A0A1Y6KMJ2	A0A1Y6K948	A0A1Y6KEZ0	A0A1Y6KHK2	A0A1Y6KFK2	A0A1Y6KVM5	na	na	na	na	na	na
1158175	2	3	1	1	1	1	A0A318W6B2	A0A318VUM8	A0A318VU06	A0A318VS47	A0A318VTQ4	A0A318VN07	A0A318VNY4	A0A318VNW7	A0A318VY97	na	na	na	na	na	na
1158289	1	1	0	1	1	1	A0A6S6S013	na	na	na	A0A6S6RS31	na	A0A6S6RUM2	A0A6S6RPV4	na	A0A6S6RZN4	na	na	na	na	A0A6S6S177
1158459	1	3	1	1	1	1	A0A1G4ZAU0	na	A0A1G4YM11	A0A1G4YNU1	A0A1G4YPG4	A0A1G4YLN5	A0A1G4YNF7	A0A1G4YNF9	A0A1G4YTI6	na	A0A1G4Y6X7	na	na	na	A0A1G4Z5Y8
115852	1	3	1	1	1	1	A0A5C4S6U6	na	A0A5C4S4R5	A0A5C4S4B5	A0A5C4S826	A0A5C4S8S5	A0A5C4S5Q0	A0A5C4S640	A0A5C4S561	na	na	na	na	na	na
1158553	0	0	0	1	1	2	na	na	na	na	na	na	R2PNY1	R2MHE7	R2MD27	R2P7M4	R2Q174	na	R2MA36	R2M5V6	na
1158601	0	0	0	1	1	1	na	na	na	na	na	na	R2R960	R2QVJ2	na	R2QWQ5	R2NK69	na	R2P8D2	R2P9I8	na
1158602	0	0	0	1	1	2	na	na	na	na	na	na	R2RDU7	R2R0K8	R2RPR2	R2S246	R2PAS6	na	R2NUA2	R2NWS0	na
1158606	1	0	0	1	1	1	R2S1P6	na	na	na	na	na	R2SBS1	R2PM31	R2PIE3	na	na	na	R2Q5T2	R2SR52	na
1158607	1	0	0	1	1	1	R2PVR5	na	na	na	na	na	R2SQ49	R2T5L7	na	R2S7X7	R2PSZ1	na	R2PWX6	R2S4N5	na
1158608	1	0	0	1	1	2	R2SJ12	na	na	na	na	na	R2SYZ3	R2QCA8	R2QDR8	R2QAV9	R2QU13	na	R2QDW3	R2QS93	na
1158609	0	0	0	1	1	2	na	na	na	na	na	na	R2RBP9	R2RBN3	R2TIQ4	R2R7Z8	R2T6C6	na	R2QQZ0	R2TFK6	na
1158610	0	0	0	1	1	2	na	na	na	na	na	na	R3TM85	R3W4Q0	R3TLV1	R3TKV9	R3TJG3	na	R3TKZ3	R3TM76	na
1158612	1	0	0	1	1	2	R3WGL9	na	na	na	na	na	R3WJT9	R3U1D3	R3WS13	R3U2T8	R3TMN4	na	R3TWM8	R3TQ64	na
1158614	0	0	0	1	1	2	na	na	na	na	na	na	R2V7L1	R2XFR3	R2XU96	R2VLB9	R2XK44	na	R2VB96	R2VBG4	na
1158660	1	0	0	1	1	1	A0A0M2A7A2	na	na	na	na	na	A0A0M2AEA6	A0A0M2ADI4	A0A0M2AAR6	na	A0A0M2A8Z1	na	A0A0M2A956	A0A0M2AAA5	na
1159016	1	2	0	1	1	1	A0A1H6MG72	na	A0A1H6IV98	A0A1H6KKY1	na	na	A0A1H6K597	A0A1H6K252	A0A1H6LT89	na	na	na	na	na	na
1159017	1	3	1	1	1	1	na	A0A1G6BDU2	A0A1G6A5R2	A0A1G6E184	A0A1G6E1H7	A0A1G6AF81	A0A1G6DJA2	A0A1G6DI84	na	A0A1G6BRY7	na	na	na	na	na
1159019	1	3	1	1	1	1	K8GUB8	na	K8GUP4	K8GUB5	K8GSJ7	K8GZ43	K8GRW8	K8GUU6	na	K8GV83	na	na	na	na	na
1159020	1	3	1	1	1	1	M3L7R5	na	M3MJJ1	M3L7R8	M3JSE1	M3L205	M3MCE8	M3MAI5	na	M3MKC3	na	na	na	na	na
1159021	1	3	1	1	1	1	M3MBS2	na	M3MC05	M3MBR6	M3M907	M3MBH9	M3MCS5	M3JWB8	na	M3L2J6	na	na	na	na	na
1159022	1	3	1	1	1	1	M3LFA7	na	M3JTK6	M3LFB1	M3MFF7	M3MIW1	M3LKS3	M3L556	na	M3JYL7	na	na	na	na	na
1159024	1	3	1	1	1	1	M3KF38	na	M3M1V5	M3KF33	M3K847	M3LFR9	M3LG16	M3LGK1	na	M3MX58	na	na	na	na	na
1159025	1	3	1	1	1	1	M3MXU5	na	M3M2I3	M3MXV1	M3MPU7	M3MPI4	M3MVE5	M3N3G7	na	M3MY78	na	na	na	na	na
1159026	1	3	1	1	1	1	T9XIT1	na	T9Y4B5	T9X364	T9X3L1	T9XJ66	T9XGA0	T9XEI4	na	T9X5B2	na	na	na	na	na
1159027	1	3	1	1	1	1	M3MJC1	na	M3NE17	M3MJB6	M3KR84	M3N6H4	M3LSC1	M3N4Y4	na	M3MFJ1	na	na	na	na	na
1159028	1	3	1	1	1	1	M3M250	na	M3KX79	M3M244	M3LW16	M3KS29	M3KRD9	M3N8U2	na	M3NIV5	na	na	na	na	na
1159029	1	3	1	1	1	1	M3MLZ9	na	M3NGS0	M3MLZ5	M3MAP3	M3NFR4	M3KXG8	M3MGM3	na	M3NKX3	na	na	na	na	na
1159030	1	3	1	1	1	1	M3N1A5	na	M3LCT9	M3N1B0	M3L1L8	M3L0X2	M3MCA0	M3NPZ1	na	M3NU94	na	na	na	na	na
1159031	1	3	1	1	1	1	M3KND5	na	M3LTE3	M3KND7	M3N4T7	M3MBF6	M3N1F5	M3N3M9	na	M3KI07	na	na	na	na	na
1159032	1	3	1	1	1	1	M3MJA4	na	M3LCC6	M3MJA2	M3NXE2	M3MYU0	M3NUS2	M3MXB1	na	M3L3P7	na	na	na	na	na
1159033	1	3	1	1	1	1	M3P2Q2	na	M3N851	M3P2Q4	M3MCK5	M3MQ37	M3N747	M3NQZ1	na	M3NWN4	na	na	na	na	na
1159034	1	3	1	1	1	1	M3NDR1	na	M3LPH2	M3NDR6	M3P5C4	M3LM95	M3P429	M3MNM3	na	M3N409	na	na	na	na	na
1159035	1	3	1	1	1	1	M3MZM3	na	M3PDX2	M3MZM5	M3LMU7	M3P051	M3LIH0	M3N024	na	M3LKZ1	na	na	na	na	na
1159036	1	3	1	1	1	1	M3N9A0	na	M3P3Q3	M3N993	M3LPL3	M3NIK5	M3MZS3	M3N0K6	na	M3MYA7	na	na	na	na	na
1159037	1	3	1	1	1	1	M3NK18	na	M3PFA9	M3NK13	M3NHB5	M3PP38	M3PRA7	M3NV08	na	M3M3P9	na	na	na	na	na
1159038	1	3	1	1	1	1	M3NSQ0	na	M3M3F4	M3NSQ3	M3PIL2	M3PWP1	M3PQ40	M3NRL4	na	M3PTU9	na	na	na	na	na
1159043	1	3	1	1	1	1	M3PED2	na	M3MPE3	M3PED6	M3QC71	M3QKG2	M3QIM5	M3PM46	na	M3QET8	na	na	na	na	na
1159046	1	3	1	1	1	1	M3QZ81	na	M3R2V2	M3QZ76	M3PZJ1	M3PL79	M3N1L3	M3P9N7	na	M3PP18	na	na	na	na	na
1159047	1	3	1	1	1	1	M3PSQ2	na	M3N338	M3PSQ5	M3PT37	M3PUV6	M3PBK1	M3R1H0	na	M3N6U9	na	na	na	na	na
1159048	1	3	1	1	1	1	M3NBU2	na	M3Q1U0	M3NBT7	M3R5H2	M3PYD1	M3QXC2	M3NE31	na	M3Q4P3	na	na	na	na	na
1159049	1	3	1	1	1	1	M3R4F1	na	M3Q7G1	M3R4F5	M3R5K1	M3NJH1	M3NQU0	M3R6L0	na	M3NJ84	na	na	na	na	na
1159051	1	3	1	1	1	1	M3R714	na	M3RAV0	M3R711	M3NIY6	M3NTS6	M3NLQ7	M3NL91	na	M3NPM7	na	na	na	na	na
1159052	1	3	1	1	1	1	M3RSS4	na	M3QV75	M3RST1	M3QIQ5	M3RQS6	M3NUX7	M3QTK3	na	M3QCQ5	na	na	na	na	na
1159053	1	3	1	1	1	1	M3P6A5	na	M3QW75	M3P6A2	M3QGM5	M3RRD5	M3R3Y2	M3Q8W3	na	M3Q9V6	na	na	na	na	na
1159054	1	3	1	1	1	1	M3RX35	na	M3QZF1	M3RX39	M3RR07	M3RQY2	M3RNR4	M3QM67	na	M3QPT7	na	na	na	na	na
1159055	1	3	1	1	1	1	M3RTU1	na	M3QW55	M3RTU5	M3S9A2	M3PAJ5	M3RUT9	M3PBY6	na	M3QJ59	na	na	na	na	na
1159057	1	3	1	1	1	1	M3PLY0	na	M3QVL5	M3PLY5	M3RHF5	M3PUG5	M3S848	M3S994	na	M3SD82	na	na	na	na	na
1159058	1	3	1	1	1	1	M3SDX6	na	M3QVB6	M3SDX3	M3SD58	M3PKA3	M3RCJ0	M3PR06	na	M3RLE5	na	na	na	na	na
1159059	1	3	1	1	1	1	M3SE65	na	M3S9X1	M3SE71	M3SHY5	M3SM23	M3RID1	M3R167	na	M3SC26	na	na	na	na	na
1159060	1	3	1	1	1	1	M5YXW8	na	M5YGH1	M5YXX8	M5Y9C4	M5YQG5	M5YJ90	M5YQ15	na	M5Y9N7	na	na	na	na	na
1159061	1	3	1	1	1	1	M5YUV6	na	M5YFK7	M5YUV1	M5YGE4	M5YDA1	M5YBV8	M5YDV5	na	M5YL97	na	na	na	na	na
1159062	1	3	1	1	1	1	M5Z1B9	na	M5YMA9	M5Z1B5	M5YJ80	M5YIN0	M5YK78	M5YLB0	na	M5YX69	na	na	na	na	na
1159064	1	3	1	1	1	1	M5YSS4	na	M5Z6N5	M5YSS8	M5YV70	M5YRG8	M5YKN1	M5Z6F4	na	M5Z1Y8	na	na	na	na	na
1159065	1	3	1	1	1	1	M3PWU4	na	M3R678	M3PWU8	M3PW78	M3Q0K7	M3SWV1	M3SSW6	na	M3RX14	na	na	na	na	na
1159071	1	3	1	1	1	1	M3S2V0	na	M3TKR3	M3S2V4	M3QP00	M3TJP3	M3TN63	M3TGC2	na	M3R063	na	na	na	na	na
1159079	1	3	1	1	1	1	M3UHD8	na	M3UBZ6	M3UHE3	M3U7D9	M3UBX6	M3U9F5	M3T108	na	M3RQQ9	na	na	na	na	na
1159080	1	3	1	1	1	1	M3RXQ4	na	M3T853	M3RXQ9	M3UIW4	M3UEX3	M3T8G1	M3T8P5	na	M3RW60	na	na	na	na	na
1159081	1	1	1	1	1	1	A0A9P2WBX7	na	na	na	A0A9P2WCH7	A0A9P2WCH7	A0A9P2SIM5	A0A9P2SML0	na	A0A9P2SIS4	na	na	A0A9P2SLG4	A0A9P2WB74	na
1159091	1	1	1	0	1	1	A0A9P2SQC6	na	na	na	A0A9P2SMP3	A0A9P2SMP3	na	A0A9P2SMZ9	na	A0A9P2SMK1	na	na	na	A0A9P2SLY2	na
1159208	1	3	1	1	1	1	J1SBM9	na	J1SI36	J0YPK9	J1H2R6	J1SIC9	J1H2M1	J0YXX1	na	J1SCH1	na	na	J0YIQ5	J1GXY5	na
1159327	1	1	0	0	0	0	A0A2L2BN11	na	A0A2L2BPV2	na	na	na	na	na	na	na	A0A2L2BRI3	na	na	na	na
1159328	1	3	1	1	1	1	U4QTI8	na	U4QTB0	U4QU47	U4QV27	U4QQA3	U4QPS9	U4QT03	U4QRD7	na	na	na	na	na	na
1159556	1	0	0	1	0	0	A0A8E5MKC3	na	na	na	na	na	A0A1B5L639	na	na	na	A0A063C602	A0A063CCR4	na	na	na
115979	1	3	0	1	1	1	A0A2N0Z3N3	na	A0A2N0Z2Y8	A0A2N0Z308	A0A2N0Z2Y5	na	A0A2N0Z4K7	A0A2N0Z4J2	A0A2N0Z780	na	A0A2N0YX30	na	A0A2N0YYJ0	A0A2N0Z0N5	na
115981	1	3	1	1	1	1	A0A3A3JTU5	na	A0A3U8JFV5	A0A3U8JHI9	A0A3A3KAI2	A0A3V6QBI8	A0A3U8JNX9	A0A3U8JNW5	A0A3U8JG56	na	A0A3A3J9R2	na	A0A3A3JN02	na	A0A3V6Q735
115992	1	3	0	0	0	0	R9TJA5	na	R9TIG7	R9TIW8	R9TFD4	na	na	na	na	na	na	na	na	na	na
1160	1	3	1	1	1	1	A0A1J1JFS9	na	A0A1J1JE11	A0A1J1JKA5	A0A1J1JHS3	A0A1J1JCW3	A0A1J1JJ11	A0A1J1JI22	A0A1J1JK23	na	na	na	na	na	na
1160091	1	0	0	1	0	0	A0A1Y2STS9	na	na	na	na	na	A0A1Y2SSN5	na	na	na	A0A1Y2SVV4	na	A0A1Y2SZU0	na	na
1160095	0	0	0	1	1	2	na	na	na	na	na	na	A0A430AGM7	A0A430AH67	A0A430AIA0	A0A430AJ03	A0A430AHW3	na	A0A430AGV9	A0A430AKV0	na
1160279	1	3	1	1	1	1	I4IEC1	na	I4IEV7	I4IJE5	I4IJE2	I4IC51	I4IIW8	I4IG95	I4IJG8	na	na	na	na	na	na
1160280	1	3	1	1	1	1	A0A822L4W3	na	A0A822LC75	A0A831ENB9	A0A822LBD2	A0A822LB68	A0A822LGV0	A0A822LA13	A0A830ZP31	na	na	na	na	na	na
1160281	1	3	1	1	1	1	I4FYZ0	na	I4G5V5	I4G3Z8	I4G3Z5	I4G366	I4G5U1	I4G4P9	I4G6L5	na	na	na	na	na	na
1160282	1	3	1	1	1	1	I4GV84	na	I4GUC1	I4H2P5	I4H2Q7	I4GSV4	I4GVJ8	I4H3T8	I4GUK9	na	na	na	na	na	na
1160283	1	3	1	1	1	1	I4HAC5	na	I4H045	I4HB16	I4HB19	I4H6A9	I4H594	I4GZH5	I4H5Q5	na	na	na	na	na	na
1160284	1	3	1	1	1	1	I4HMV0	na	I4HVZ3	I4HNL5	I4HZK9	I4HU85	I4HFA3	I4HU54	I4I5F9	na	na	na	na	na	na
1160285	1	3	1	1	1	1	I4HQB4	na	I4I424	I4I3M2	I4HKD3	I4HRM1	I4I460	I4HNM9	I4HJ73	na	na	na	na	na	na
1160286	1	3	1	1	1	1	I4FKX2	na	I4FL42	I4FR08	I4FQV2	I4FX37	I4FL56	I4FSF0	I4FW70	na	na	na	na	na	na
1160497	1	0	0	1	0	0	A0A1L9VH20	na	na	na	na	na	A0A1L9VLT2	na	na	na	A0A1L9V554	A0A1L9VWM6	na	na	na
1160506	1	0	0	1	0	0	I7ZZE3	na	na	na	na	na	I8TUF9	na	na	na	I8A0K0	I8TLS6	na	na	na
1160507	1	0	0	0	0	0	J8PNE5	na	na	na	na	na	na	na	na	na	na	na	na	na	na
1160509	1	0	0	1	0	0	A0A3N4IEE3	na	na	na	na	na	A0A3N4INU4	na	na	na	A0A3N4INE9	A0A3N4I0Z5	na	na	na
1160705	1	1	0	0	1	0	L8PGC3	na	L8PPH2	na	na	na	na	L8P3S4	na	na	L8PEF5	na	na	na	na
1160711	1	0	0	0	0	0	A0A0E2WC00	na	na	na	na	na	na	na	na	na	A0A0E2WKJ1	na	na	na	na
1160718	1	1	0	0	1	0	J1RQD5	na	J1ZRJ2	na	na	na	na	J2JW90	na	na	J2A441	na	J1RK58	na	na
1160719	1	0	0	1	0	0	U1EYR2	na	na	na	na	na	A0A9X5LTS5	na	na	na	na	na	na	na	U1GKC0
1160720	1	3	1	1	1	1	A0A0S1YR20	na	A0A0S1YJ57	A0A0S1YLJ8	A0A0S1YLK4	A0A0S1YMC6	A0A0S1YHD9	A0A0S1YHL2	A0A0S1YQZ4	na	A0A0S1YGB2	na	na	na	na
1160721	0	0	0	1	1	1	na	na	na	na	na	na	W0U7F8	W0U883	na	W0U7Z1	na	na	W0U4S0	W0U3C8	na
1160739	1	3	1	1	1	1	A0A752RP34	na	A0A752RU32	A0A752RVM6	A0A752RWM0	A0A752RR95	A0A752VPA5	A0A752VV17	A0A752VRC3	na	A0A752RSW2	na	A0A752RUL6	na	A0A752RLW3
1160765	1	3	1	1	1	1	A0A447NQ30	na	A0A447NKS1	A0A3S4ENP1	A0A3S4H1I1	A0A447NKM4	A0A447NZI0	A0A3S4GYJ6	A0A3S4EWK0	na	A0A3S4EXI7	na	A0A447NK78	na	A0A3S5DB13
1160769	1	3	1	1	1	1	A0A603E2J0	na	A0A5X9X6Q4	A0A5W0T6U2	A0A5W0TEB9	A0A5X9X6S6	A0A5W0TA30	A0A603DU49	A0A603DYQ1	na	A0A5W0TAP8	na	A0A5X9X7J5	na	A0A5W0T7B2
1160778	1	3	1	1	1	1	A0A734MMK2	na	A0A734MLB4	A0A734HSI9	A0A734HGT0	A0A734HSK2	A0A734HTE4	A0A734HHA0	A0A734MJD0	na	A0A734HP93	na	A0A734HTQ1	na	A0A734MIN4
116085	1	3	1	1	1	1	A0A3E2TMM9	na	A0A3E2TAU8	A0A3E2TS81	A0A3E2TP11	A0A3E2TMU0	A0A3E2TQ84	A0A3E2TRT5	na	A0A3E2XI62	na	na	na	na	na
1160851	0	1	0	0	0	0	na	na	A0A7K5V8S5	na	na	na	na	na	na	na	na	A0A7K5VQJ9	na	na	na
1160894	0	1	0	0	0	0	na	na	A0A7K6J585	na	na	na	na	na	na	na	na	A0A7K6IFY7	na	na	na
1160895	1	3	0	0	0	0	A0A031LQ90	na	A0A031LST7	A0A031LPV6	A0A031LMZ1	na	na	na	na	na	na	na	na	na	na
116090	1	3	0	1	1	1	A0A6P1YDI2	na	A0A6P1YG76	A0A6P1YH81	A0A6P1YBS5	na	A0A6P1YBS1	A0A6P1YEI1	A0A6P1YAA3	na	na	na	A0A6P1YCW8	A0A6P1YBL0	na
116092	2	3	1	1	1	1	A0A5H2YBB8	A0A5H2XYV2	A0A5H2Y2Y3	A0A5H2Y1P0	A0A5H2XZB8	A0A5H2XUT2	A0A5H2YRK9	A0A5H2YD96	A0A5H2XTZ4	na	na	na	na	na	na
1161099	1	0	0	1	0	0	A0A1N7J729	na	na	na	na	na	A0A1N7IPB4	na	na	na	A0A1N7J2M9	na	na	na	A0A1N7IPA1
1161409	1	0	0	1	0	0	W2VKU9	na	na	na	na	na	W2VE51	na	na	na	W2VC18	na	W2VCZ8	na	na
1161412	1	1	1	1	1	1	X6Q1E9	na	na	na	X6Q440	X6PY85	X6PUX6	X6PZT7	X6PV08	na	na	na	na	na	X6PY22
1161416	1	3	1	1	1	1	X8K8Z3	na	X8KBD7	X8K8Z8	X8K8Q9	X8KB25	X8KAA3	X8K8U0	na	X8KAN3	na	na	X8K6T0	X8K986	na
1161417	1	3	1	1	1	1	W3XU28	na	W3XZC9	W3XZ38	W3Y1I4	W3Y1E6	W3Y4D2	W3Y9C3	W3XT75	na	na	na	W3XZA4	W3XSP1	na
1161421	1	3	1	1	1	1	J4K766	na	J4TIE4	J4TIF0	J4K9X2	J4K9W4	J4TCI5	J4K8D5	na	J4K8V2	na	na	J4TEJ1	J5GT51	na
1161424	1	3	1	0	1	1	J5W2M9	na	J6GS39	J5VUA9	J6H095	J6GSG9	na	J4VVL6	na	J5VQU5	na	na	na	na	J5VRQ5
116150	1	2	0	0	0	0	S4NXA4	na	S4PGH6	na	S4Q067	na	na	na	na	na	na	S4PF51	na	na	na
1161743	1	0	0	1	0	0	I3BEE9	na	na	na	na	na	I3BM81	na	na	na	I3BAG7	na	I3BEL0	na	na
116188	1	1	0	0	1	0	A0A5J6I0Z6	na	A0A5J6I9A1	na	na	na	na	A0A5J6I1Q6	na	na	A0A5J6I2E7	na	A0A5J6I2T6	na	na
1161902	1	1	0	1	1	1	na	W2C1W0	W2BZU8	na	na	na	W2BZ79	W2BYX9	na	W2C1C4	na	na	W2BXV1	na	W2BXG1
1161904	1	0	0	1	0	0	I3ASF0	na	na	na	na	na	I3B5I7	na	na	na	I3AT44	na	I3AWS9	na	na
1161912	1	1	0	1	1	1	na	K2PHQ6	K2PPB1	na	na	na	K2PG23	K2PMF6	na	K2PPH0	na	na	K2PDT9	na	K2PEI9
1161918	0	0	0	1	1	1	na	na	na	na	na	na	K0JL10	K0JF74	na	K0JLZ4	K0JHT5	na	K0JLK9	na	K0JH19
1161919	1	3	1	1	1	1	V5Z920	na	V5Z5H8	V5Z587	V5Z516	V5Z4B7	V5Z4X2	V5Z635	na	V5Z8P0	V5ZC01	na	na	na	V5ZCL8
1162282	2	3	1	1	0	1	I4VIW5	I4WVL6	I4VIF1	I4WD00	I4VNG7	I4VPG0	I4WGA7	na	I4WAN4	na	I4WFQ4	na	na	na	na
1162296	2	0	0	0	1	1	J2X4X1	J2LM03	na	na	na	na	na	J2E8G7	J2LXQ4	na	J2X8A1	na	na	na	na
1162418	1	0	0	1	1	1	na	A0A1X7NSI7	na	na	na	na	A0A1X7MWE9	A0A1X7PZ98	A0A1X7P9X5	na	A0A1X7PVK6	na	na	na	A0A1X7NTT8
1162633	0	0	0	1	1	1	na	na	na	na	na	na	A0A7G9T4Y7	A0A7G9T4Y6	A0A7G9T5D0	na	A0A7G9T7E3	na	A0A7G9T473	A0A7G9T3V1	na
1162668	1	3	1	1	1	1	I0IN73	na	I0IKQ1	I0IKD8	I0IKD9	I0IPG4	I0INR0	I0IKG3	I0IL35	na	na	na	na	na	na
1162706	1	0	0	1	1	0	A0A6J4TE90	na	na	na	na	na	A0A6J4T3L7	A0A6J4TP20	na	na	na	A0A6J4RDZ9	na	na	na
1162967	1	0	0	0	0	0	A0A2M9CNE1	na	na	na	na	na	na	na	na	na	A0A2M9CF31	na	na	na	na
1162970	1	0	0	0	0	0	A0A542Y1M6	na	na	na	na	na	na	na	na	na	na	na	na	na	na
1163302	0	0	0	1	1	1	na	na	na	na	na	na	U2ZTK9	U2YGK7	na	U2YGK8	na	na	U2YF74	U2ZWN4	na
1163398	2	3	1	1	1	1	A0A2M9VR01	A0A2M9VSP8	A0A2M9VJ87	A0A2M9VH80	A0A2M9VHB0	A0A2M9VM89	A0A2M9VPN0	A0A2M9VPX1	A0A2M9VI59	na	A0A2M9VMP7	na	na	na	na
1163406	1	0	0	1	0	0	A0A0L0N5G7	na	na	na	na	na	A0A0L0NEN4	na	na	na	A0A0L0N620	A0A0L0NK18	na	na	na
1163407	2	3	1	1	1	1	I4VRG1	I4W5U0	I4W2K4	I4VYN6	I4VYN7	I4W7A4	I4W5F1	I4W5F0	I4W419	na	na	na	na	na	na
1163408	2	3	1	1	1	1	I4VPZ2	I4VYH4	I4VLS1	I4VY04	I4VY03	I4VRA1	I4VNB2	I4VXA6	I4VKF6	na	na	na	na	na	na
1163617	2	3	1	1	1	1	S6A9M5	S6B659	S6B2J5	S6AF71	S6ABE4	S6B4E9	S6AMI3	S6B682	S6B5A1	na	na	na	na	na	na
1163730	0	2	0	0	0	0	na	na	I0A068	na	H9ZZP7	na	na	na	na	na	na	na	na	H9ZZV8	na
1163741	1	3	1	1	1	1	A0A0E0WE30	na	A0A0E0WBW7	A0A0E0WE37	A0A0E0WDE9	A0A0E0WE40	A0A0E0WB66	A0A0E0WA20	na	A0A0E0WAI5	na	na	na	na	na
1163742	1	3	1	1	1	1	I0EI88	na	I0EI92	I0EI93	I0EHG6	I0EJV7	I0EGK2	I0EGU9	na	I0EG30	na	na	na	na	na
1163743	1	3	1	0	1	1	I0EXC5	na	I0EXC9	I0EXD0	I0EWS6	I0EYK8	na	I0EVW7	na	I0EV47	na	na	na	na	na
1163745	1	3	1	1	1	1	I0ETB5	na	I0ETB9	I0ETC0	I0EQP3	I0EQE2	I0ERB3	I0ETJ4	na	I0ERZ2	na	na	na	na	na
1163748	1	3	1	1	1	1	H8W9B3	na	H8WB94	H8WAZ3	H8WAZ2	H8W757	H8W740	H8W741	H8WBE3	na	na	na	na	na	na
1164594	1	3	1	1	1	1	A0A1I1LH87	na	A0A1I1QXE5	A0A1I1R558	A0A1I1NYL3	A0A1I1NTB9	A0A1I1T6V0	A0A1I1T6Z5	A0A1I1V1K2	na	na	na	na	na	na
1164595	1	0	0	0	0	0	A0A3L7J7W5	na	na	na	na	na	na	na	na	na	A0A3L7IWE3	na	na	na	na
1165090	0	0	0	1	0	0	na	na	na	na	na	na	A0AA51NIA8	na	na	na	na	na	na	na	na
1165092	1	3	1	1	1	1	W3AJ91	na	W3AJU1	W3AJF0	W3AJ93	W3AKG4	W3ANP7	W3AN78	na	W3AUA7	W3AT55	na	W3ALG8	W3AKA8	na
1165094	1	3	1	1	1	1	M1WZK6	na	M1WZP4	M1X0I5	M1WZ52	M1X4M2	M1WZ72	M1WTH7	M1WTN3	na	na	na	na	na	na
1165095	1	1	1	1	1	1	M1X421	na	na	na	M1WNY2	M1WW40	M1WPW9	M1WVV4	M1X3Y3	na	na	na	na	na	na
1165689	1	3	1	1	1	1	A0A1G5VAP0	na	A0A1G5ZZ18	A0A1G5ZYW4	A0A1G5ZZ21	A0A1G5XAK1	A0A1G5V492	A0A1G5V5W3	A0A1G5VX46	na	A0A1G5ZDN8	na	na	na	A0A1G5ZQH2
1165841	1	3	1	1	1	1	I2K5K9	na	I2K579	I2K580	I2K8A6	I2K4B1	I2K931	I2K4T0	na	I2K9D3	na	na	na	na	na
1165852	1	2	1	1	1	1	A0A317REK8	na	A0A317RFD0	A0A317RD26	na	A0A317RAI3	A0A317R8F6	A0A317R9U7	A0A317RFZ4	na	na	na	na	na	A0A317RFW7
1165861	1	0	0	0	0	0	A0A0L0VRZ5	na	na	na	na	na	na	na	na	na	na	A0A0L0VZQ2	na	na	na
1165867	1	0	0	1	0	0	I0W6R1	na	na	na	na	na	I0WQ70	na	na	na	I0WBJ4	na	na	na	I0WQ71
116598	0	0	0	1	0	0	na	na	na	na	na	na	A0A6M5E5K0	na	na	na	na	na	na	na	na
1166018	1	2	0	1	1	1	I0K9X6	na	I0K9H4	I0KA41	na	na	I0KE81	I0KG27	I0K9E9	na	I0K348	na	na	na	I0K8R2
116603	1	0	0	1	0	0	A0A9P7AP43	na	na	na	na	na	A0A9P7DDW5	na	na	na	A0A9P7J4S8	A0A9P7AKC3	na	na	na
1166073	1	1	1	1	1	1	A0A1H0JNG2	na	A0A1H0FG34	na	na	A0A1H0GQ62	A0A1H0MGA0	A0A1H0MFE1	A0A1H0IT95	na	A0A1H0F5D9	na	na	na	A0A1H0IAA5
1166078	1	1	1	1	1	1	A0A7W6BVE4	na	A0A7W6BVX0	na	na	A0A7W6BWE5	A0A7W6BST9	A0A7W6BNX7	A0A7W6BRJ6	na	A0A7W6FUA8	na	na	na	A0A7W6BQ26
1166257	1	0	1	1	1	1	A0A1I4QVL5	na	na	na	na	A0A2N3LZ23	A0A2N3M2M9	A0A1I4QQ98	A0A1I4SQC4	na	A0A1I4QFP3	na	na	na	A0A1I4RNT3
1166323	1	2	1	1	1	1	A0A1G7K7L1	na	na	A0A1G7KJK7	A0A1G7KIS9	A0A1G7FNY2	A0A1G7L3L3	A0A1G7L2K5	A0A1G7EWY1	na	A0A1G7LZQ0	na	na	na	A0A1G7FB90
1166337	1	2	1	1	1	1	A0A1I6JM02	na	na	A0A1I6JY51	A0A1I6JY90	A0A1I6LCN8	A0A1I6LCR3	A0A1I6K119	A0A1I6JRZ4	na	na	na	na	na	A0A1I6JX09
1166340	1	2	1	1	1	1	A0A1H7Y4V9	na	na	A0A1H7YSK6	A0A1H7YRL3	A0A1H8JF84	A0A1H8BGT6	A0A1H8BJG6	A0A1H8G3C1	na	na	na	na	na	A0A1H8C996
1166950	2	3	1	1	1	1	A0A2K8UCW6	A0A2K8UFW5	A0A2K8U3R0	A0A2K8U269	A0A2K8U277	A0A2K8U1Z0	A0A2K8UFU3	A0A2K8UF22	A0A2K8UHT6	na	na	na	na	na	na
1167006	1	3	0	1	1	1	na	M1PCY0	M1PTT0	M1PDU7	M1P1I3	na	M1NBM4	M1PQK7	na	M1PMJ4	na	na	na	na	na
116718	1	3	1	1	1	1	A0A919YEU7	na	A0A919Y9J4	A0A919YDD3	A0A919YAG7	A0A919YAE0	A0A920CTH5	A0A919YGJ2	A0A919YII9	na	A0A919Y7K0	na	A0A919YHK8	na	A0A919YEQ0
1167641	1	3	1	1	1	2	A0A0L8AFX8	na	A0A0L8AB11	A0A0L8A687	A0A0L8A6H4	A0A0L8A528	A0A0L8ABZ6	A0A0L8AB88	A0A0L8AE82	A0A0L8AFI1	A0A0L8A938	na	na	na	A0A0L8A963
116794	1	0	0	1	0	0	A0A8H3ICC9	na	na	na	na	na	A0A8H3EYV2	na	na	na	A0A8H3EV14	A0A8H3J419	na	na	na
1168034	1	1	0	1	1	1	X5DU17	na	X5DED3	na	na	na	X5DI15	X5DDU1	X5DFV9	na	A0A1I0GV63	na	na	na	X5DAY6
1168035	1	1	0	1	1	1	A0A1M6C0N0	na	A0A1M6IFK0	na	na	na	A0A1M6MDF1	A0A1M6A6X6	A0A1M6ABW2	na	A0A1M6EPG2	na	na	na	A0A1M6AW40
1168039	1	3	1	1	1	1	A0A521BZU4	na	A0A521BZW0	A0A521B8G5	A0A521B8D0	A0A521B8V2	A0A521ELV4	A0A521BDR4	A0A521C493	na	na	na	na	na	na
1168065	1	3	1	1	1	1	I2JJP7	na	I2JND8	I2JPE2	I2JPE3	I2JJR9	I2JN14	I2JN13	I2JIZ3	na	na	na	na	na	I2JNT8
1168221	1	0	0	1	0	0	R7YMQ2	na	na	na	na	na	R7Z2V4	na	na	na	R7YHC0	R7YHG4	na	na	na
1168287	1	0	0	0	0	0	I2A805	na	na	na	na	na	na	na	na	na	I2AIN4	na	na	na	na
116849	1	3	1	1	1	1	A0A562I276	na	A0A562J0W1	A0A562I147	A0A562I183	A0A562I0W5	A0A562IZI4	A0A562J007	A0A562J1R1	na	na	na	na	na	A0A562J1X9
1168544	1	0	0	1	0	0	A0A9P4GLW1	na	na	na	na	na	A0A9P4L5Z4	na	na	na	A0A9P4GBW6	A0A9P4L460	na	na	na
1168545	1	0	0	1	0	0	A0A6G1J411	na	na	na	na	na	A0A6G1J1P5	na	na	na	A0A6G1IDM5	A0A6G1IP33	na	na	na
1168546	1	0	0	1	0	0	A0A9P4J0Y9	na	na	na	na	na	A0A9P4MLW0	na	na	na	A0A9P4IY53	A0A9P4MGN0	na	na	na
1168729	1	0	0	0	1	0	A0A4Q2T5Z0	na	na	na	na	na	na	A0A4Q2T101	na	na	na	na	na	na	na
1168730	1	0	0	0	1	0	A0A4Q2RSE9	na	na	na	na	na	na	A0A4Q2RR16	na	na	na	na	A0A4Q2S3K5	na	na
1168814	0	0	0	0	0	0	na	na	na	na	na	na	na	na	na	na	na	na	na	na	H9YQH3
1168847	0	0	0	0	0	0	na	na	na	na	na	na	na	na	na	na	na	na	na	na	H9YPT0
1168865	1	0	0	0	0	0	A0A806H986	na	na	na	na	na	na	na	na	na	A0A806GST5	na	na	na	A0A806H149
1169307	1	0	0	1	1	1	R3GQX3	na	na	na	na	na	R3H457	R3JFZ5	R3JA42	na	R3GZ31	na	R3J9Q1	R3J526	na
1169311	1	0	0	1	1	1	R3K7J5	na	na	na	na	na	R3IBW1	R3IBD5	R3KZ33	na	R3I0J7	na	R3I8F4	R3KDE8	na
1169322	1	3	1	1	1	1	R8WV19	na	R8WPG8	R8WQG3	R8WZ97	R8WQ49	R8WYP4	R8WZ58	R8X2I3	na	R8WXF7	na	na	na	R8WJG8
1169353	1	3	1	0	1	2	A0A829G8E5	na	A0A829G0F3	A0A829FZZ6	A0A829G9N6	A0A829FZM6	na	A0A829G9F1	A0A829G5A8	A0A829G749	A0A829G3H4	na	na	na	A0A829FQ16
1169414	1	0	0	0	0	0	A0A9P2T7M8	na	na	na	na	na	na	na	na	na	A0A9P2T9N4	na	na	na	na
1169474	1	1	0	1	1	1	A0A0G4FW95	na	A0A0G4F2G1	na	na	na	A0A0G4HL47	A0A0G4I088	na	A0A0G4I088	A0A0G4FLT9	A0A0G4HQS9	na	na	na
1169539	1	1	0	1	0	0	A0A7S1K8Y5	na	A0A7S1NX01	na	na	na	A0A7S1JQB1	na	na	na	A0A7S1K563	na	na	na	na
1169540	1	1	0	1	0	0	A0A0G4ER85	na	A0A0G4FK63	na	na	na	A0A0G4EBX0	na	na	na	A0A0G4EFL6	A0A0G4FB77	na	na	na
1169673	1	3	1	1	1	1	K0ZPG1	na	K0ZPT9	K0Z3D9	K0ZCD4	K0Z413	K1A676	K0ZWL3	na	K0ZRH2	na	na	K0Z513	na	na
1169675	1	3	1	0	1	1	K0Z9T0	na	K0YZ99	K0Z1A1	K0YYW2	K0ZP47	na	K0ZEK1	na	K0ZC40	na	na	K0ZJN1	K0ZHP1	na
116970	0	0	0	1	0	0	na	na	na	na	na	na	A0A9W9FYQ0	na	na	na	na	A0A9W9EKF5	na	na	na
1169742	1	0	0	0	1	0	A0A7Y6VS66	na	na	na	na	na	na	A0A7Y6SJ07	na	na	na	na	na	na	na
1169743	1	0	0	0	1	0	A0A7Y6HRW8	na	na	na	na	na	na	A0A7Y6HX51	na	na	na	na	na	na	na
1169746	1	0	0	0	1	0	A0A7Y6FMZ4	na	na	na	na	na	na	A0A7Y6FMQ4	na	na	na	na	A0A7Y6FIZ8	na	na
1169855	1	0	0	1	1	1	na	X6KXG5	na	na	na	na	X6L5T7	X6KVH6	X6L4D8	na	X6KSE0	na	na	na	X6KVR9
1169913	2	3	1	1	1	1	A0A919DAV7	A0A918ZB99	A0A918Z1M1	A0A918Z0N3	A0A918Z0M8	A0A918YXK7	A0A918YUT0	A0A918YUT5	A0A918YUY2	na	na	na	na	na	A0A918YYL2
117	1	3	1	1	1	0	A0A923BGF9	na	A0A922XAT2	A0A923BGV2	A0A922XDZ9	A0A922XDM2	A0A922XDD3	A0A922XCT8	na	na	A0A922XAB0	na	na	na	na
117008	0	0	0	1	0	0	na	na	na	na	na	na	A0A1J4MNL3	na	na	na	na	na	na	na	na
117010	1	0	0	1	0	0	A0A8H5HQY9	na	na	na	na	na	A0A8H5HM73	na	na	na	A0A8H5HLX1	A0A8H5HFT9	na	na	na
117018	1	0	0	0	0	0	A0A9P7KBH8	na	na	na	na	na	na	na	na	na	A0A9P7GCH3	A0A9P7KBP4	na	na	na
1170229	1	0	0	0	0	0	K9FRB6	na	na	na	na	na	na	na	na	na	K9FLA3	K9G971	na	na	na
1170230	1	0	0	0	0	0	K9FVR6	na	na	na	na	na	na	na	na	na	K9FEA0	K9G372	na	na	na
1170562	1	3	1	1	1	1	K9V5L9	na	K9V950	K9UTF0	K9V843	K9V854	K9V493	K9UZ29	K9V8M4	na	K9UW80	na	na	na	na
117069	1	0	0	0	0	0	A0A9P7KLT6	na	na	na	na	na	na	na	na	na	A0A9P7G2K4	A0A9P7FQ00	na	na	na
1170768	1	3	1	1	1	1	A0A9Q5QVK1	na	A0A9Q5QZ66	A0A9Q5WBM1	A0A9Q5QX02	A0A9Q5QZS0	A0A9Q5QZK8	A0A9Q5QUT2	A0A9Q5QW19	na	na	na	na	na	na
1170769	1	3	1	1	1	1	A0A1X4GAB8	na	A0A1X4G8H6	A0A1X4G950	A0A1X4G4T0	A0A1X4G3S3	A0A1X4GAJ2	A0A1X4G2R5	A0A1X4G585	na	na	na	na	na	na
1171373	1	0	0	1	0	0	K7SN29	na	na	na	na	na	K7SIX8	na	na	na	na	na	na	na	K7S3S2
1171375	2	3	1	1	1	1	I5CPF3	I5CB32	I5CWM9	I5CWM8	I5CWM7	I5CZZ4	I5D1V3	I5D1V2	I5D1I2	na	I5D4N5	na	na	na	na
1171543	1	3	1	1	1	1	na	A0A917CWM8	A0A917FLY6	A0A917CGI9	A0A917CK96	A0A917CWE0	A0A917CMM3	A0A917CEG5	A0A917FP38	na	na	na	na	na	na
117157	1	0	0	0	1	0	A0A1H1QIW4	na	na	na	na	na	na	A0A1H1XJ38	na	na	A0A1H1LLX9	na	na	na	na
117165	1	1	0	0	0	0	A0A7K8ZKM9	na	A0A7K8ZNB3	na	na	na	na	na	na	na	na	A0A7K8ZFG6	na	na	na
117179	1	0	0	0	0	0	A0A8X7N6L2	na	na	na	na	na	na	na	na	na	A0A8X7T3B3	A0A8X7N5C9	na	na	na
117187	1	0	0	1	0	0	A0A366PJ88	na	na	na	na	na	A0A366QE34	na	na	na	A0A366PA71	A0A366R1K5	na	na	na
1172182	1	1	0	0	0	0	A0A1G5LJF1	na	A0A1G5BP14	na	na	na	na	na	na	na	na	na	na	na	na
1172189	1	1	0	1	0	0	J9I169	na	J9IEC3	na	na	na	J9IZ33	na	na	na	na	na	na	na	na
1172190	1	3	1	1	1	1	T0JQ05	na	T0KRB1	T0L1C2	T0L376	T0JQ41	T0J2V4	T0JSY2	na	T0JBW0	na	na	na	na	na
1172194	1	3	1	1	1	1	I7ZHJ2	na	I8T4L0	I8T303	I7Z8T2	I7Z9B3	I8T4Q8	I8T7S5	I8HXT1	na	na	na	na	na	I8I5L5
1172204	1	0	0	0	1	1	A0A446ICZ3	na	na	na	na	na	na	A0A446IF35	A0A446IEH1	na	A0A446IBH2	na	na	A0A446I9L0	na
1172562	1	0	0	1	1	1	A0A809N7G9	na	na	na	na	na	A0A809NCR6	A0A809NJN4	na	A0A809NEV5	na	na	na	na	A0A809N5R1
1172565	1	3	1	1	1	1	A0A3N0UJ51	na	A0A3N0UQA9	A0A3N0URG3	A0A3N0U8U7	A0A3N0UHE9	A0A3N0UHX0	A0A3N0UHT4	na	A0A3N0U8P9	na	na	na	na	A0A3N0UB86
1172567	1	0	0	0	1	0	A0A0U3KJ07	na	na	na	na	na	na	A0A0U3BTH2	na	na	na	na	A0A0U3L9W4	na	na
1172614	1	3	1	1	1	1	A0A5C4T9S6	na	A0A5C4T8P7	A0A5C4T8X5	A0A5C4T977	A0A5C4T8Q4	A0A5C4TFR5	A0A5C4TD84	A0A5C4TA09	na	A0A5C4SWP0	na	na	na	A0A5C4T8C3
1172621	1	0	0	0	0	0	A0A841ASB1	na	na	na	na	na	na	na	na	na	A0A841AP39	na	na	na	na
1173020	1	3	1	1	1	1	K9UG59	na	K9UQ32	K9UJE6	K9U8G7	K9ULW3	K9UMT3	K9UQR2	K9UH96	na	na	na	na	na	na
1173022	1	3	1	1	1	1	K9W6V1	na	K9VX27	K9W417	K9W4C8	K9VXX1	K9VZI5	K9VWL9	K9W326	na	na	na	na	na	na
1173025	1	3	1	1	1	1	K9S8G6	na	K9S709	K9S846	K9SC01	K9S9G5	K9SAG9	K9S8Y6	K9S9W5	na	K9SDA3	na	na	na	na
1173026	1	3	1	1	1	1	K9X8G7	na	K9XHX9	K9XHU6	K9X863	K9XC20	K9XG73	K9XL20	K9XDD9	na	K9XHR0	na	na	na	K9XM61
1173027	1	3	1	1	1	1	K9WG65	na	K9WNM8	K9WHF9	K9W8J4	K9WFH4	K9WGR2	K9WKU9	K9WIX0	na	K9WAJ0	na	na	na	na
1173061	1	0	0	1	0	0	A0A0J9X5V2	na	na	na	na	na	A0A0J9X7Y8	na	na	na	A0A0J9X520	A0A0J9XID0	na	na	na
1173062	1	1	1	1	1	1	I4ZV40	na	I4ZU87	na	na	I4ZTJ5	I4ZT18	I4ZT22	I4ZU40	na	na	na	na	na	na
1173064	1	0	0	1	0	0	S5PF73	na	na	na	na	na	S5Q1N8	na	na	na	na	na	na	na	na
1173101	1	3	1	1	1	1	A0A975R9I6	na	A0A975MRA8	A0A975RAE1	A0A975MS51	A0A975MKD7	A0A975R9A6	A0A975RBD0	A0A975MPH5	na	na	na	na	na	na
1173111	1	3	1	1	1	1	A0A1H8F9A6	na	A0A1H8C195	A0A1H8C1W5	A0A1H8C2B1	A0A1H8C1E8	A0A1H8FVN2	A0A1H8C2F2	A0A1H8H978	na	na	na	A0A1H8BFG4	A0A1H8IW75	na
1173263	1	3	1	1	1	1	K9SXU5	na	K9SS67	K9SXJ9	K9SWV9	K9SPN8	K9SRH7	K9SSW0	K9SQ84	na	na	na	na	na	na
1173427	1	3	1	1	1	1	A0A4D6P5M0	na	A0A4D6P7M6	A0A4D6P1L1	A0A4D6PAY6	A0A4D6P7G1	A0A4D6P9X7	A0A4D6P6W8	A0A4D6P8R4	na	A0A4D6PA85	na	A0A4D6P3A1	na	A0A4D6P5U0
1173578	1	3	1	1	1	1	A0A5I2WYZ8	na	A0A5I2X4H8	A0A5I2X7T9	A0A5I2X2D2	A0A5I2XAM4	A0A5I2X5K4	A0A5I2X8X6	A0A726Y3N3	na	A0A5I2X787	na	A0A5I2X716	na	A0A5I2WXC3
1173584	1	0	0	1	1	1	na	A0A1I0QP27	na	na	na	na	A0A1I0Q477	A0A1I0PFR9	A0A1I0MY17	na	A0A1I0Q6D8	na	na	na	A0A1I0ML47
1173585	1	0	0	1	1	1	na	A0A238JY41	na	na	na	na	A0A238JUC1	A0A238JX44	A0A238KLL2	na	A0A238JVL2	na	na	na	A0A238KQ43
1173677	1	3	1	1	1	2	A0A5C4RJ49	na	A0A5C4REM7	A0A5C4RDL1	A0A5C4RMC1	A0A5C4RFV2	A0A5C4REG1	A0A5C4REY0	A0A5C4RJR0	A0A5C4RLD2	A0A5C4RIE8	na	na	na	A0A5C4RG48
1173701	1	0	0	1	0	0	A0A066XHT7	na	na	na	na	na	A0A066XPL8	na	na	na	A0A066WZR8	A0A066XEJ5	na	na	na
1173779	1	3	1	1	1	1	A0A8F0CHA2	na	A0A8F0CHJ4	A0A8F0CG46	A0A8E9YAH5	A0A8F0CG41	A0A8E9YCX9	A0A8E9YD73	A0A8F0CFF8	na	A0A8E9YBD0	na	A0A8E9YGK7	na	A0A8E9YDN3
1173947	1	3	1	1	1	1	A0A1J6YLX8	na	A0A2K0JEK5	A0A1J6Y4Z2	A0A1J6Z5Q6	A0A1J6ZL27	A0A2K0JFE2	A0A1J6YDN7	A0A2K0JKA5	na	A0A2K0JA82	na	A0A1J6YMX5	na	A0A1J6Z4S1
1173950	1	3	1	1	1	1	V1H2Z4	na	V1GY18	V1H5Z4	V1HCS0	V1GKS2	V1HC32	V1GWU5	V1H6M7	na	V1GNY1	na	V1H847	na	V1HSM1
1173995	1	3	1	1	1	1	A0A840I0M7	na	A0A840I6T3	A0A840I335	A0A840I3G1	A0A840I0R1	A0A840I531	A0A840I3C5	A0A840I6A0	na	na	na	na	na	na
1174501	1	3	1	1	1	1	A0A1G8SV79	na	A0A1G8GVR1	A0A1G8GVS8	A0A1G8GW32	A0A1G8GWI5	A0A1G8IC21	A0A1G8IC91	A0A1G8SUR0	na	A0A1G8ESL0	na	A0A1G9GHL4	na	A0A1G9ELA5
1174684	1	2	1	1	1	1	N9UQ68	na	na	N9W9G1	N9VYL0	N9WG02	N9WHZ0	N9WHZ5	N9W4D2	na	na	na	na	na	N9VYS4
117506	1	1	1	1	1	1	A0A939GXS8	na	na	na	A0A939H210	A0A939GXI6	A0A939GWL6	A0A939KDT7	A0A939KC70	na	na	na	na	na	A0A939KD85
1175306	2	3	1	1	1	1	I3CM35	I3CVX6	I3CVM5	I3CVM6	I3CNT8	I3CRL7	I3CYC0	I3CYB9	I3CZB8	na	na	na	na	na	I3CPJ3
117539	0	0	0	0	0	0	na	na	na	na	na	na	na	na	na	na	na	A0A4Y7NMA9	na	na	na
117541	1	3	1	1	1	1	A0A3V5VWR8	na	A0A3V5VVP0	A0A3V5VVK6	A0A3V5VRS0	A0A3V5VVN8	A0A3V5VRZ1	A0A3V5VS17	A0A3W0PEI6	na	A0A3V5VRE8	na	A0A3W0PDU8	na	A0A3V5VTM5
1175486	1	0	0	0	1	0	A0A543A1W9	na	na	na	na	na	na	A0A543A7U3	na	na	A0A543A6G9	na	na	na	na
1175631	1	3	1	1	1	2	A0A1D7Z5D0	na	A0A1D7YXE6	A0A1D7YX52	A0A1D7Z3I1	A0A1D7Z3M4	A0A1D7Z3F9	A0A1D7Z3M6	A0A1D7YY58	A0A1D7Z4C1	A0A1D7YZJ5	na	na	na	J8T9F6
1175654	1	3	0	0	0	0	A0A0S0N787	na	A0A0S0MVM4	A0A0S0NAI5	A0A0S0N8S9	na	na	na	na	na	na	na	na	na	na
117567	1	0	0	1	0	0	A0A6H0S539	na	na	na	na	na	A0A6H0S7S1	na	na	na	A0A6H0SFU3	na	na	na	A0A6H0SFU9
1176127	1	0	0	1	0	0	A0A6A6B849	na	na	na	na	na	A0A6A6B2K0	na	na	na	A0A6A6B889	A0A6A6BN82	na	na	na
1176131	1	0	0	1	0	0	A0A6G1GLW0	na	na	na	na	na	A0A6G1GNW6	na	na	na	A0A6G1H0Y9	A0A6G1H8B7	na	na	na
1176176	1	3	1	1	1	1	A0A512IUE7	na	A0A512IJ67	A0A512IR19	A0A512IJF2	A0A512ITN6	A0A512IRC6	A0A512IR97	A0A512IQX7	na	na	na	na	na	na
1176177	1	3	1	1	1	1	A0A7W6AJT6	na	A0A7W6AJX8	A0A7W6AKU4	A0A7W6AI88	A0A7W6AIV5	A0A7W6F9D3	A0A7W6F9Q0	A0A7W6F953	na	na	na	na	na	na
1176198	1	1	0	0	0	0	A0A1I6THU3	na	A0A1I6RYI3	na	na	na	na	na	na	na	na	na	A0A1I6PD85	na	na
1176239	1	3	1	1	1	1	na	A0A917B0T4	A0A917EY92	A0A917EYR3	A0A917EVV4	A0A917EUQ7	A0A917AYH1	A0A917AXK4	A0A917B3S6	na	A0A917EVY8	na	A0A917B0H1	na	A0A917AY74
1176243	1	3	1	1	1	1	A0A2T0V6D2	na	A0A2T0UZU5	A0A2T0V140	A0A2T0V116	A0A2T0V8C2	A0A2T0V4J3	A0A2T0V4L2	A0A2T0V7N4	na	na	na	na	na	A0A2T0V5V4
1176249	1	1	0	1	0	0	A0A917LVF5	na	A0A917GP13	na	na	na	A0A917GL31	na	na	na	na	na	na	na	A0A917GJY9
1176257	1	3	1	1	1	1	A0A365PQW9	na	A0A365PRA9	A0A365PXQ5	A0A365PXP9	A0A365PU08	A0A365PZX3	A0A365Q0D7	A0A365PWT1	na	na	na	na	na	A0A365PNK8
1176259	1	3	1	1	1	1	A0A482U1G9	na	A0A482UDZ8	A0A482UF76	A0A482U5H0	A0A482U4G8	A0A482U809	A0A482UDC4	A0A482UJI8	na	na	na	na	na	na
1176533	1	3	1	1	1	0	A0A518N430	na	A0A518N3F3	A0A518N5J7	A0A518N5K6	A0A518N4D7	A0A518N1J6	A0A518N1J9	na	na	na	na	na	na	na
1176536	1	2	1	1	1	1	A0A5B8S6A7	na	na	A0A5B8S591	A0A5B8S3M9	A0A5B8RZJ2	A0A5B8S6K5	A0A5B8S6H9	A0A5B8S3H2	na	na	na	na	na	A0A5B8S2R5
1176539	1	2	1	1	1	1	A0A5C6TVL1	na	na	A0A5C6TP92	A0A5C6TQL9	A0A5C6TRJ5	A0A5C6TPT0	A0A5C6TQQ4	A0A5C6TS57	na	na	na	na	na	A0A5C6TP72
1176587	1	2	0	1	1	1	A0A1A9HXS0	na	A0A1A9HWW4	A0A1A9I9F3	na	na	A0A1A9I4A1	A0A1A9I3S6	A0A1A9HXN4	na	na	na	na	na	A0A1A9HZD0
1176646	1	1	0	0	0	0	A0A7H0G7R2	na	na	A0A7H0G4W9	na	na	na	na	na	na	na	na	na	na	na
1176648	1	3	1	1	1	1	A0A2P8H710	na	A0A2P8GAQ8	A0A2P8GAQ3	A0A2P8GAP5	A0A2P8H244	A0A2P8GMC3	A0A2P8GMC6	A0A2P8G9D6	na	na	na	A0A2P8H316	na	A0A2P8H6Q2
1176649	1	3	1	1	1	1	A0A2W5H5U1	na	A0A2W5FHG0	A0A2W5HH87	A0A2W5FAL7	A0A2W5GKY9	A0A2W5F0W8	A0A7Z7BI60	A0A2W5FJW8	na	A0A2W5EN47	na	na	na	A0A2W5ET19
117680	2	3	1	1	1	1	A0A7Y8FYL6	A0A7Y8KG87	A0A7Y8G2N3	A0A7Y8G035	A0A7Y8G046	A0A7Y8G167	A0A7Y7ZIE5	A0A7Y8G5I6	A0A7Y8KEP4	na	A0A7Y8G6Y7	na	na	na	na
117681	2	3	1	1	1	2	A0A7Y7WI02	A0A7Y7WWW0	A0A7Y7XLE8	A0A7Y7WDA2	A0A7Y7X9Y5	A0A7Y7X8Q0	A0A7Y7YEF0	A0A7Y7W9T5	A0A7Y7WEV0	A0A7Y7XV56	A0A7Y7WDI2	na	na	na	A0A7Y7WNN7
1177154	1	3	1	1	1	1	na	A0A095SIJ5	A0A095SIZ6	A0A095TSB7	A0A095SL17	A0A095UVV2	A0A095USR6	A0A095SLP0	A0A095SI94	na	na	na	na	na	na
1177157	1	3	1	1	1	1	na	A0A2N8LZY2	A0A2N8LZU2	A0A2N8M5L2	A0A2N8M5N3	A0A2N8LWR7	A0A2N8M2A0	A0A2N8M2A3	A0A2N8M3F1	na	na	na	na	na	na
1177169	1	3	1	1	1	1	na	A0A9Q3UJ64	A0A9Q3UIH0	A0A9Q3UMD7	A0A9Q3ULL0	A0A9Q3YMS2	A0A9Q3UJU5	A0A9Q3UNN6	A0A9Q3UKD9	na	na	na	na	na	na
1177179	1	3	1	1	1	1	na	L0WJ53	L0WG81	L0WAH3	L0WDX4	L0WAM5	L0WDB8	L0WAX8	L0WG25	na	na	na	na	na	na
1177180	0	0	0	1	0	0	na	na	na	na	na	na	A0AA34T4R4	na	na	na	na	na	na	na	na
1177181	1	3	1	1	1	1	na	A0A095SCL2	A0A095TIK2	A0A095S864	A0A095TDG9	A0A095TGV4	A0A095S9G3	A0A095UEP3	A0A095TIV6	na	na	na	na	na	na
1177213	1	0	0	1	1	0	na	A0A916JS73	na	na	na	na	A0A916NLT8	A0A916JSX9	na	na	na	na	na	na	na
1177216	1	3	1	1	1	0	A0A8E4EY83	na	A0A8E4H447	A0A8E4EXX4	A0A8E4F103	A0A8E4GHX4	A0A8E4H2L6	A0A8E4F109	na	na	na	na	na	na	na
1177574	1	1	1	1	1	1	A0A2K9H7G0	na	na	na	A0A2N9Y9K1	A0A2K9H8B9	A0A2K9H7Q7	A0A2K9H9G6	A0A2K9HG21	na	na	na	na	na	A0A2K9HAH9
1177594	1	0	0	0	0	0	W0Z501	na	na	na	na	na	na	na	na	na	W0Z8I4	na	na	na	na
1177712	1	3	1	1	0	1	A0A833JM30	na	A0A833N6A6	A0A833JNK9	A0A833JGV3	A0A833JKQ7	A0A833NA58	na	A0A833JLJ8	na	A0A833JG12	na	na	na	na
1177755	1	2	1	1	1	1	A0A1E2S186	na	na	A0A1E2S1Y2	A0A1E2S1T3	A0A1E2S1T0	A0A1E2S2I8	A0A1E2S2Z2	A0A1E2RZZ0	na	na	na	na	na	na
1177928	1	3	1	1	1	1	K2LZU8	na	K2LEE1	K2LU11	K2KUE3	K2LKH1	K2KV28	K2MBM1	K2KV36	na	na	na	na	na	K2LWY9
1177929	1	3	1	1	1	1	A0A367U9K6	na	A0A367UCH2	A0A367UCG0	A0A367UCH0	A0A367U6W6	A0A367U7C2	A0A367U730	A0A367U697	na	A0A367UAC5	A0A367UHM7	na	na	A0A367U9W5
1177930	1	3	1	1	1	1	A0A853L3U4	na	A0A853KXJ4	A0A853KXY4	A0A853KWJ0	A0A853L3M1	A0A853L356	A0A853L480	A0A853L5M6	na	na	na	na	na	A0A853L339
1177931	1	3	1	1	1	1	J0L8B0	na	J0UWS8	J0L433	J0L4G6	J0UY58	J0LB82	J1F8B7	na	J0L806	na	na	na	na	na
1177982	2	3	1	1	1	2	A0A1I2GDF1	A0A1I2BLL5	A0A1I2BQB1	A0A1I2BQI0	A0A1I2AZE5	A0A1I2CLP6	A0A1I2EWG9	A0A1I2GJX7	A0A1I2EEI7	A0A7V8JS98	na	na	na	na	A0A1I2ERH4
117820	1	1	0	0	0	0	A0A507EWV7	na	A0A507F6G3	na	na	na	na	na	na	na	A0A507EQ25	A0A507EYN2	na	na	na
1178482	2	3	1	1	1	1	W1ND68	W1NA72	W1NB10	W1NCP9	W1NBS2	W1N5J8	W1NAC2	W1NA93	W1N3V4	na	W1NCE7	na	na	na	W1NBX7
1178515	1	3	1	1	1	1	A0A172TPE0	na	A0A172TML4	A0A172TMJ9	A0A172TQ13	A0A172TF24	A0A172TJG6	A0A172TJK4	A0A172TEW0	na	A0A172TNN5	na	na	na	na
1178516	1	2	0	1	1	1	A0A1P9WXD3	na	A0A1P9WT45	A0A1P9WTG6	na	na	A0A1P9WRP7	A0A1P9WRU4	A0A1P9WTS3	na	A0A1P9WTT0	na	na	na	A0A1P9WSZ8
1178537	2	3	1	1	1	1	K2MLT9	K2NC09	K2N7G5	K2N305	K2MEZ1	K2NG36	K2N8M1	K2N402	K2MJ07	na	K2N4F1	na	K2N5X3	na	K2NL67
1178540	2	3	1	1	1	1	A0A081LDI9	A0A081LC87	A0A081L6Z7	A0A081L6Z6	A0A081L6Z8	A0A081L6Z5	A0A081LBB0	A0A081LBA9	A0A081LB08	na	A0A081L8W6	na	A0A081LDG1	na	A0A081LDR5
1178778	1	2	0	1	1	1	A0A223V1K9	na	A0A223V535	A0A223V1T3	na	na	A0A223VAV5	A0A223VBW2	A0A223VBA8	na	na	na	na	na	A0A223V240
1178825	1	2	0	1	1	1	A0A1M6CAY7	na	A0A1M6CJT1	A0A1M6ABH3	na	na	A0A1M6FR85	A0A1M6F923	A0A1M6EZB6	na	na	na	na	na	A0A1M6F2A5
117903	1	0	0	0	0	0	A0A3S5CRZ5	na	na	na	na	na	na	na	na	na	na	na	na	na	na
1179155	1	3	1	1	0	0	A0A084CM93	na	A0A084CMC1	A0A084CM91	A0A084CM90	A0A084CNW2	A0A084CPC9	na	na	na	na	na	na	na	na
1179467	1	0	0	1	1	1	A0A4R3L1H0	na	na	na	na	na	A0A4R3L9W5	A0A4R3L9G4	A0A4R3L9R4	na	na	na	A0A4R3LDK9	A0A4V2UVT0	na
1179667	2	3	1	0	1	1	A0A554T954	A0A554TMU1	A0A554TGX4	A0A554T9U4	A0A554T9B3	A0A554TI82	na	A0A554T9D1	A0A554TLA9	na	A0A554TC88	na	na	na	A0A554T9A1
1179670	1	1	0	1	0	0	A0A229HNW2	na	A0A229HCA6	na	na	na	A0A229HQ40	na	na	na	A0A229HPW2	na	na	na	A0A229HQF0
1179671	1	0	0	0	0	0	A0A554N6H3	na	na	na	na	na	na	na	na	na	A0A554N0G5	na	na	na	na
1179672	1	2	0	1	1	1	A0A1S8ZQU4	na	A0A1S9A076	A0A1S9A0I0	na	na	A0A1S9A4H4	A0A1S9A0G0	A0A1S8ZXH2	na	na	na	na	na	A0A1S8ZXG7
1179674	1	0	0	1	0	0	A0A554QTU6	na	na	na	na	na	A0A554QT22	na	na	na	A0A554QZQ8	na	na	na	A0A554QT21
1179743	1	2	0	1	1	1	A0A2N3UB24	na	A0A2N3U7R6	A0A2N3V2B2	na	na	A0A2N3UAK4	A0A2N3UAD0	A0A2N3UBB0	na	na	na	na	na	A0A2N3U8C3
1179773	1	3	0	0	0	0	K0JR27	na	K0JQ41	K0JXB9	K0JYS9	na	na	na	na	na	K0KD68	na	na	na	na
1179777	0	0	0	0	0	0	na	na	na	na	na	na	na	na	na	na	na	na	L5LAK5	na	na
1179778	1	3	1	1	1	1	I4N1C8	na	I4MXM9	I4N8X2	I4N8X3	I4N5E5	I4N893	I4N892	I4N4Q2	na	I4N6L9	na	na	na	na
118060	0	0	0	1	1	2	na	na	na	na	na	na	A0A0U2XIU3	A0A0U2VV05	A0A0U2VUM9	A0A0U2VRY5	A0A0U2NU35	na	A0A0U2IUB2	A0A0U2LYX1	na
118062	0	3	0	0	0	0	na	na	A0A1D3L4T2	A0A1D3L4Q2	A0A1D3L0J4	na	na	na	na	na	na	na	na	na	na
118079	0	0	0	0	0	0	na	na	na	na	na	na	na	na	na	na	A0A7S1HQ04	A0A7S1HQA2	na	na	na
118101	1	3	1	1	1	0	A0A1B2H8L9	na	A0A1B2H945	A0A1B2H8R8	A0A1B2H913	A0A1B2H8F5	A0A1B2H8F0	A0A1B2H828	na	na	na	na	na	na	na
118109	1	2	1	1	1	0	A0A3G2I6G2	na	A0A3G2I6Q2	A0A3G2I5U7	na	A0A3G2I5X3	A0A3G2I6J3	A0A3G2I672	na	na	na	na	na	na	na
118118	0	0	0	1	0	0	na	na	na	na	na	na	A0A6C1F6Z3	na	na	na	na	na	na	na	na
118126	0	3	0	0	0	0	na	na	A0A1M4MM29	A0A1M4MLZ0	A0A1M4MLU0	na	na	na	na	na	na	na	na	na	na
1181271	1	3	1	1	1	1	A0A839UQY0	na	A0A839UYB4	A0A850NPI9	A0A839UVH3	A0A850NUC0	A0A850NTK1	A0A850NWA4	na	A0A839V0C1	A0A839USN6	na	na	na	na
118154	1	2	0	1	0	0	A0A9Q1ELR0	na	A0A9Q1FQ34	na	A0A9Q1FGH9	na	A0A9Q1EUJ2	na	na	na	na	A0A9Q1GB29	na	na	na
118163	1	3	1	1	1	1	K9T4B9	na	K9T5T3	K9T6E8	K9T7Q9	K9SZE8	K9T9B6	K9T806	K9TB05	na	na	na	na	na	na
1181670	1	3	1	1	1	1	na	A0A482Z201	A0A482YYB3	A0A482Z5T5	A0A482YXS1	A0A483AIB9	A0A482YXZ3	A0A482YYH0	na	A0A482YVW1	na	na	na	na	na
118168	1	3	1	1	1	1	B4VSW2	na	B4VM09	B4VPZ5	B4VPR7	B4VPX3	B4VTJ0	B4VP97	B4VK91	na	B4VXP7	na	na	na	na
1181728	1	3	1	1	1	1	S1P896	na	S1P3U8	S1PDA4	S1PK76	S1PDC1	S1QAP8	S1PJY2	S1PCI7	na	S1PDE1	na	S1P1B4	na	S1NWN4
118183	1	1	0	0	0	0	A0A7L0UFP1	na	A0A7L0U9S0	na	na	na	na	na	na	na	na	A0A7L0UBD3	na	na	na
1181879	1	3	0	0	0	0	A0A840IS99	na	A0A840IRA2	A0A840IPJ3	A0A840ISR4	na	na	na	na	na	A0A840IW60	na	na	na	na
1181884	1	0	0	0	0	0	A0A562IYD6	na	na	na	na	na	na	na	na	na	A0A562IWQ6	na	na	na	na
1181886	1	1	0	0	0	0	A0A561TZ39	na	A0A561V8L2	na	na	na	na	na	na	na	na	na	na	na	na
118200	1	1	0	0	0	0	A0A093GWW4	na	A0A093FT75	na	na	na	na	na	na	na	na	na	na	na	na
1182263	1	3	1	1	1	1	A0A249E422	na	A0A249E3C6	A0A249E499	A0A249E0T2	A0A249E1N2	A0A249E1I5	A0A249E5E4	na	A0A249E2L8	na	na	na	na	na
118246	1	3	1	1	1	1	A0A540V6L2	na	A0A540UX43	A0A540UX12	A0A540UX15	A0A540UYD5	A0A540V044	A0A540V017	A0A540V203	na	na	na	A0A540V5C9	A0A540V249	na
1182541	1	0	0	1	0	0	W9ZHN8	na	na	na	na	na	W9YPN5	na	na	na	W9XZM6	W9YY69	na	na	na
1182542	1	0	0	1	0	0	W9ZCH6	na	na	na	na	na	W9YIY5	na	na	na	W9XLB4	W9XVD5	na	na	na
1182543	1	0	0	1	0	0	W9X8B8	na	na	na	na	na	W9W8S5	na	na	na	W9WTZ4	W9X3N7	na	na	na
1182544	1	0	0	1	0	0	W9VXA4	na	na	na	na	na	W9VZW4	na	na	na	W9W5U8	W9VU05	na	na	na
1182545	1	0	0	0	0	0	A0A072NUG4	na	na	na	na	na	na	na	na	na	A0A072NY70	A0A072NYV4	na	na	na
1182568	1	0	0	1	1	1	A0A172TD95	na	na	na	na	na	A0A172TCC4	A0A172T9P0	A0A172TAY4	na	A0A172T846	na	na	na	A0A172TC76
1182590	2	3	1	1	1	1	W6QUW3	W6R1F2	W6QVF9	W6R051	W6QYS5	W6QX49	W6R0R5	W6RJ66	W6RB94	na	na	na	na	na	W6R9U5
1182671	1	3	1	0	1	1	A0A9P2WUT1	na	A0A9P2WU71	A0A9P2THJ8	A0A9P2TM70	A0A9P2WU69	na	A0A9P2WWL7	A0A9P2TEL5	na	A0A9P2TJ08	na	na	na	A0A9P2TGP3
1182680	1	3	1	1	1	1	S1EV53	na	S1ERE9	S1EZN6	S1FGF0	S1EEZ7	S1FGA7	S1F752	S1EEZ8	na	S1EIY1	na	na	na	S1E903
1182725	1	3	1	0	1	1	L4J6A2	na	L4J1L6	L4J2P0	L4JEJ2	L4J3R5	na	L4JE97	L4JJX8	na	L4J4Y9	na	na	na	L4IXY4
[truncated: 32,663 more rows]
